# Supplementary material for: Vascular plant community composition from the campos rupestres of the Itacolomi State Park, Brazil
Source: Biodivers Data J. 2015 Feb 27;(3):e4507. doi: 10.3897/BDJ.3.e4507 (PMC4355493; doi:10.3897/BDJ.3.e4507)
Supplement: Supplementary material 2 — Calais [file biodiversity_data_journal-3-e4507-s002.zip]

Archive with 8 entries (7 files):
- camporupestre-15plot-survey-sampling-itacolomi-calais107-checklist/
- camporupestre-15plot-survey-sampling-itacolomi-calais107-checklist/distribution.txt
- camporupestre-15plot-survey-sampling-itacolomi-calais107-checklist/eml.xml
- camporupestre-15plot-survey-sampling-itacolomi-calais107-checklist/habit.txt
- camporupestre-15plot-survey-sampling-itacolomi-calais107-checklist/measurementorfactsoil.txt
- camporupestre-15plot-survey-sampling-itacolomi-calais107-checklist/measurementorfactspeciescardinality.txt
- camporupestre-15plot-survey-sampling-itacolomi-calais107-checklist/meta.xml
- camporupestre-15plot-survey-sampling-itacolomi-calais107-checklist/taxon.txt
