# Supplementary material for: Vascular plant community composition from the campos rupestres of the Itacolomi State Park, Brazil
Source: Biodivers Data J. 2015 Feb 27;(3):e4507. doi: 10.3897/BDJ.3.e4507 (PMC4355493; doi:10.3897/BDJ.3.e4507)
Supplement: Supplementary material 2 — Calais [file biodiversity_data_journal-3-e4507-s002.zip › camporupestre-15plot-survey-sampling-itacolomi-calais107-checklist/distribution.txt]

id	locationID	locality	countryCode	occurrenceStatus	establishmentMeans	eventDate	source	occurrenceRemarks
taxonIdCalais007	PlotCalais01_La20La41011Lo43Lo50209	Itacolomi State Park, Calais, MG, Brazil	BR	present	native	2008-10-21T09:26Z	http://dx.doi.org/10.5539/enrr.v2n3p129	taxonIdCalais007_PlotC01/decimalLatitude/-20.41011/decimalLongitude/-43.50209
taxonIdCalais008	PlotCalais01_La20La41011Lo43Lo50209	Itacolomi State Park, Calais, MG, Brazil	BR	present	native	2008-10-21T09:26Z	http://dx.doi.org/10.5539/enrr.v2n3p138	taxonIdCalais008_PlotC01/decimalLatitude/-20.41011/decimalLongitude/-43.50209
taxonIdCalais011	PlotCalais01_La20La41011Lo43Lo50209	Itacolomi State Park, Calais, MG, Brazil	BR	present	native	2008-10-21T09:26Z	http://dx.doi.org/10.5539/enrr.v2n3p157	taxonIdCalais011_PlotC01/decimalLatitude/-20.41011/decimalLongitude/-43.50209
taxonIdCalais014	PlotCalais01_La20La41011Lo43Lo50209	Itacolomi State Park, Calais, MG, Brazil	BR	present	native	2008-10-21T09:26Z	http://dx.doi.org/10.5539/enrr.v2n3p173	taxonIdCalais014_PlotC01/decimalLatitude/-20.41011/decimalLongitude/-43.50209
taxonIdCalais015	PlotCalais01_La20La41011Lo43Lo50209	Itacolomi State Park, Calais, MG, Brazil	BR	present	native	2008-10-21T09:26Z	http://dx.doi.org/10.5539/enrr.v2n3p180	taxonIdCalais015_PlotC01/decimalLatitude/-20.41011/decimalLongitude/-43.50209
taxonIdCalais016	PlotCalais01_La20La41011Lo43Lo50209	Itacolomi State Park, Calais, MG, Brazil	BR	present	native	2008-10-21T09:26Z	http://dx.doi.org/10.5539/enrr.v2n3p188	taxonIdCalais016_PlotC01/decimalLatitude/-20.41011/decimalLongitude/-43.50209
taxonIdCalais020	PlotCalais01_La20La41011Lo43Lo50209	Itacolomi State Park, Calais, MG, Brazil	BR	present	native	2008-10-21T09:26Z	http://dx.doi.org/10.5539/enrr.v2n3p205	taxonIdCalais020_PlotC01/decimalLatitude/-20.41011/decimalLongitude/-43.50209
taxonIdCalais022	PlotCalais01_La20La41011Lo43Lo50209	Itacolomi State Park, Calais, MG, Brazil	BR	present	native	2008-10-21T09:26Z	http://dx.doi.org/10.5539/enrr.v2n3p216	taxonIdCalais022_PlotC01/decimalLatitude/-20.41011/decimalLongitude/-43.50209
taxonIdCalais023	PlotCalais01_La20La41011Lo43Lo50209	Itacolomi State Park, Calais, MG, Brazil	BR	present	native	2008-10-21T09:26Z	http://dx.doi.org/10.5539/enrr.v2n3p227	taxonIdCalais023_PlotC01/decimalLatitude/-20.41011/decimalLongitude/-43.50209
taxonIdCalais026	PlotCalais01_La20La41011Lo43Lo50209	Itacolomi State Park, Calais, MG, Brazil	BR	present	native	2008-10-21T09:26Z	http://dx.doi.org/10.5539/enrr.v2n3p234	taxonIdCalais026_PlotC01/decimalLatitude/-20.41011/decimalLongitude/-43.50209
taxonIdCalais034	PlotCalais01_La20La41011Lo43Lo50209	Itacolomi State Park, Calais, MG, Brazil	BR	present	native	2008-10-21T09:26Z	http://dx.doi.org/10.5539/enrr.v2n3p258	taxonIdCalais034_PlotC01/decimalLatitude/-20.41011/decimalLongitude/-43.50209
taxonIdCalais038	PlotCalais01_La20La41011Lo43Lo50209	Itacolomi State Park, Calais, MG, Brazil	BR	present	native	2008-10-21T09:26Z	http://dx.doi.org/10.5539/enrr.v2n3p273	taxonIdCalais038_PlotC01/decimalLatitude/-20.41011/decimalLongitude/-43.50209
taxonIdCalais040	PlotCalais01_La20La41011Lo43Lo50209	Itacolomi State Park, Calais, MG, Brazil	BR	present	native	2008-10-21T09:26Z	http://dx.doi.org/10.5539/enrr.v2n3p278	taxonIdCalais040_PlotC01/decimalLatitude/-20.41011/decimalLongitude/-43.50209
taxonIdCalais042	PlotCalais01_La20La41011Lo43Lo50209	Itacolomi State Park, Calais, MG, Brazil	BR	present	native	2008-10-21T09:26Z	http://dx.doi.org/10.5539/enrr.v2n3p287	taxonIdCalais042_PlotC01/decimalLatitude/-20.41011/decimalLongitude/-43.50209
taxonIdCalais044	PlotCalais01_La20La41011Lo43Lo50209	Itacolomi State Park, Calais, MG, Brazil	BR	present	native	2008-10-21T09:26Z	http://dx.doi.org/10.5539/enrr.v2n3p292	taxonIdCalais044_PlotC01/decimalLatitude/-20.41011/decimalLongitude/-43.50209
taxonIdCalais049	PlotCalais01_La20La41011Lo43Lo50209	Itacolomi State Park, Calais, MG, Brazil	BR	present	native	2008-10-21T09:26Z	http://dx.doi.org/10.5539/enrr.v2n3p307	taxonIdCalais049_PlotC01/decimalLatitude/-20.41011/decimalLongitude/-43.50209
taxonIdCalais051	PlotCalais01_La20La41011Lo43Lo50209	Itacolomi State Park, Calais, MG, Brazil	BR	present	native	2008-10-21T09:26Z	http://dx.doi.org/10.5539/enrr.v2n3p317	taxonIdCalais051_PlotC01/decimalLatitude/-20.41011/decimalLongitude/-43.50209
taxonIdCalais052	PlotCalais01_La20La41011Lo43Lo50209	Itacolomi State Park, Calais, MG, Brazil	BR	present	native	2008-10-21T09:26Z	http://dx.doi.org/10.5539/enrr.v2n3p324	taxonIdCalais052_PlotC01/decimalLatitude/-20.41011/decimalLongitude/-43.50209
taxonIdCalais056	PlotCalais01_La20La41011Lo43Lo50209	Itacolomi State Park, Calais, MG, Brazil	BR	present	native	2008-10-21T09:26Z	http://dx.doi.org/10.5539/enrr.v2n3p335	taxonIdCalais056_PlotC01/decimalLatitude/-20.41011/decimalLongitude/-43.50209
taxonIdCalais058	PlotCalais01_La20La41011Lo43Lo50209	Itacolomi State Park, Calais, MG, Brazil	BR	present	native	2008-10-21T09:26Z	http://dx.doi.org/10.5539/enrr.v2n3p344	taxonIdCalais058_PlotC01/decimalLatitude/-20.41011/decimalLongitude/-43.50209
taxonIdCalais061	PlotCalais01_La20La41011Lo43Lo50209	Itacolomi State Park, Calais, MG, Brazil	BR	present	native	2008-10-21T09:26Z	http://dx.doi.org/10.5539/enrr.v2n3p353	taxonIdCalais061_PlotC01/decimalLatitude/-20.41011/decimalLongitude/-43.50209
taxonIdCalais063	PlotCalais01_La20La41011Lo43Lo50209	Itacolomi State Park, Calais, MG, Brazil	BR	present	native	2008-10-21T09:26Z	http://dx.doi.org/10.5539/enrr.v2n3p363	taxonIdCalais063_PlotC01/decimalLatitude/-20.41011/decimalLongitude/-43.50209
taxonIdCalais065	PlotCalais01_La20La41011Lo43Lo50209	Itacolomi State Park, Calais, MG, Brazil	BR	present	native	2008-10-21T09:26Z	http://dx.doi.org/10.5539/enrr.v2n3p375	taxonIdCalais065_PlotC01/decimalLatitude/-20.41011/decimalLongitude/-43.50209
taxonIdCalais067	PlotCalais01_La20La41011Lo43Lo50209	Itacolomi State Park, Calais, MG, Brazil	BR	present	native	2008-10-21T09:26Z	http://dx.doi.org/10.5539/enrr.v2n3p386	taxonIdCalais067_PlotC01/decimalLatitude/-20.41011/decimalLongitude/-43.50209
taxonIdCalais068	PlotCalais01_La20La41011Lo43Lo50209	Itacolomi State Park, Calais, MG, Brazil	BR	present	native	2008-10-21T09:26Z	http://dx.doi.org/10.5539/enrr.v2n3p391	taxonIdCalais068_PlotC01/decimalLatitude/-20.41011/decimalLongitude/-43.50209
taxonIdCalais069	PlotCalais01_La20La41011Lo43Lo50209	Itacolomi State Park, Calais, MG, Brazil	BR	present	native	2008-10-21T09:26Z	http://dx.doi.org/10.5539/enrr.v2n3p402	taxonIdCalais069_PlotC01/decimalLatitude/-20.41011/decimalLongitude/-43.50209
taxonIdCalais074	PlotCalais01_La20La41011Lo43Lo50209	Itacolomi State Park, Calais, MG, Brazil	BR	present	native	2008-10-21T09:26Z	http://dx.doi.org/10.5539/enrr.v2n3p416	taxonIdCalais074_PlotC01/decimalLatitude/-20.41011/decimalLongitude/-43.50209
taxonIdCalais076	PlotCalais01_La20La41011Lo43Lo50209	Itacolomi State Park, Calais, MG, Brazil	BR	present	native	2008-10-21T09:26Z	http://dx.doi.org/10.5539/enrr.v2n3p431	taxonIdCalais076_PlotC01/decimalLatitude/-20.41011/decimalLongitude/-43.50209
taxonIdCalais077	PlotCalais01_La20La41011Lo43Lo50209	Itacolomi State Park, Calais, MG, Brazil	BR	present	invasive	2008-10-21T09:26Z	http://dx.doi.org/10.5539/enrr.v2n3p443	taxonIdCalais077_PlotC01/decimalLatitude/-20.41011/decimalLongitude/-43.50209
taxonIdCalais078	PlotCalais01_La20La41011Lo43Lo50209	Itacolomi State Park, Calais, MG, Brazil	BR	present	native	2008-10-21T09:26Z	http://dx.doi.org/10.5539/enrr.v2n3p446	taxonIdCalais078_PlotC01/decimalLatitude/-20.41011/decimalLongitude/-43.50209
taxonIdCalais079	PlotCalais01_La20La41011Lo43Lo50209	Itacolomi State Park, Calais, MG, Brazil	BR	present	native	2008-10-21T09:26Z	http://dx.doi.org/10.5539/enrr.v2n3p458	taxonIdCalais079_PlotC01/decimalLatitude/-20.41011/decimalLongitude/-43.50209
taxonIdCalais081	PlotCalais01_La20La41011Lo43Lo50209	Itacolomi State Park, Calais, MG, Brazil	BR	present	invasive	2008-10-21T09:26Z	http://dx.doi.org/10.5539/enrr.v2n3p463	taxonIdCalais081_PlotC01/decimalLatitude/-20.41011/decimalLongitude/-43.50209
taxonIdCalais083	PlotCalais01_La20La41011Lo43Lo50209	Itacolomi State Park, Calais, MG, Brazil	BR	present	native	2008-10-21T09:26Z	http://dx.doi.org/10.5539/enrr.v2n3p482	taxonIdCalais083_PlotC01/decimalLatitude/-20.41011/decimalLongitude/-43.50209
taxonIdCalais084	PlotCalais01_La20La41011Lo43Lo50209	Itacolomi State Park, Calais, MG, Brazil	BR	present	native	2008-10-21T09:26Z	http://dx.doi.org/10.5539/enrr.v2n3p493	taxonIdCalais084_PlotC01/decimalLatitude/-20.41011/decimalLongitude/-43.50209
taxonIdCalais087	PlotCalais01_La20La41011Lo43Lo50209	Itacolomi State Park, Calais, MG, Brazil	BR	present	native	2008-10-21T09:26Z	http://dx.doi.org/10.5539/enrr.v2n3p504	taxonIdCalais087_PlotC01/decimalLatitude/-20.41011/decimalLongitude/-43.50209
taxonIdCalais089	PlotCalais01_La20La41011Lo43Lo50209	Itacolomi State Park, Calais, MG, Brazil	BR	present	native	2008-10-21T09:26Z	http://dx.doi.org/10.5539/enrr.v2n3p509	taxonIdCalais089_PlotC01/decimalLatitude/-20.41011/decimalLongitude/-43.50209
taxonIdCalais091	PlotCalais01_La20La41011Lo43Lo50209	Itacolomi State Park, Calais, MG, Brazil	BR	present	native	2008-10-21T09:26Z	http://dx.doi.org/10.5539/enrr.v2n3p513	taxonIdCalais091_PlotC01/decimalLatitude/-20.41011/decimalLongitude/-43.50209
taxonIdCalais092	PlotCalais01_La20La41011Lo43Lo50209	Itacolomi State Park, Calais, MG, Brazil	BR	present	native	2008-10-21T09:26Z	http://dx.doi.org/10.5539/enrr.v2n3p518	taxonIdCalais092_PlotC01/decimalLatitude/-20.41011/decimalLongitude/-43.50209
taxonIdCalais093	PlotCalais01_La20La41011Lo43Lo50209	Itacolomi State Park, Calais, MG, Brazil	BR	present	native	2008-10-21T09:26Z	http://dx.doi.org/10.5539/enrr.v2n3p521	taxonIdCalais093_PlotC01/decimalLatitude/-20.41011/decimalLongitude/-43.50209
taxonIdCalais094	PlotCalais01_La20La41011Lo43Lo50209	Itacolomi State Park, Calais, MG, Brazil	BR	present	native	2008-10-21T09:26Z	http://dx.doi.org/10.5539/enrr.v2n3p529	taxonIdCalais094_PlotC01/decimalLatitude/-20.41011/decimalLongitude/-43.50209
taxonIdCalais097	PlotCalais01_La20La41011Lo43Lo50209	Itacolomi State Park, Calais, MG, Brazil	BR	present	native	2008-10-21T09:26Z	http://dx.doi.org/10.5539/enrr.v2n3p534	taxonIdCalais097_PlotC01/decimalLatitude/-20.41011/decimalLongitude/-43.50209
taxonIdCalais100	PlotCalais01_La20La41011Lo43Lo50209	Itacolomi State Park, Calais, MG, Brazil	BR	present	native	2008-10-21T09:26Z	http://dx.doi.org/10.5539/enrr.v2n3p548	taxonIdCalais100_PlotC01/decimalLatitude/-20.41011/decimalLongitude/-43.50209
taxonIdCalais101	PlotCalais01_La20La41011Lo43Lo50209	Itacolomi State Park, Calais, MG, Brazil	BR	present	native	2008-10-21T09:26Z	http://dx.doi.org/10.5539/enrr.v2n3p560	taxonIdCalais101_PlotC01/decimalLatitude/-20.41011/decimalLongitude/-43.50209
taxonIdCalais005	PlotCalais02_La20La40998Lo43Lo50199	Itacolomi State Park, Calais, MG, Brazil	BR	present	native	2008-10-21T09:26Z	http://dx.doi.org/10.5539/enrr.v2n3p122	taxonIdCalais005_PlotC02/decimalLatitude/-20.40998/decimalLongitude/-43.50199
taxonIdCalais007	PlotCalais02_La20La40998Lo43Lo50199	Itacolomi State Park, Calais, MG, Brazil	BR	present	native	2008-10-21T09:26Z	http://dx.doi.org/10.5539/enrr.v2n3p130	taxonIdCalais007_PlotC02/decimalLatitude/-20.40998/decimalLongitude/-43.50199
taxonIdCalais009	PlotCalais02_La20La40998Lo43Lo50199	Itacolomi State Park, Calais, MG, Brazil	BR	present	native	2008-10-21T09:26Z	http://dx.doi.org/10.5539/enrr.v2n3p145	taxonIdCalais009_PlotC02/decimalLatitude/-20.40998/decimalLongitude/-43.50199
taxonIdCalais010	PlotCalais02_La20La40998Lo43Lo50199	Itacolomi State Park, Calais, MG, Brazil	BR	present	native	2008-10-21T09:26Z	http://dx.doi.org/10.5539/enrr.v2n3p146	taxonIdCalais010_PlotC02/decimalLatitude/-20.40998/decimalLongitude/-43.50199
taxonIdCalais011	PlotCalais02_La20La40998Lo43Lo50199	Itacolomi State Park, Calais, MG, Brazil	BR	present	native	2008-10-21T09:26Z	http://dx.doi.org/10.5539/enrr.v2n3p158	taxonIdCalais011_PlotC02/decimalLatitude/-20.40998/decimalLongitude/-43.50199
taxonIdCalais015	PlotCalais02_La20La40998Lo43Lo50199	Itacolomi State Park, Calais, MG, Brazil	BR	present	native	2008-10-21T09:26Z	http://dx.doi.org/10.5539/enrr.v2n3p181	taxonIdCalais015_PlotC02/decimalLatitude/-20.40998/decimalLongitude/-43.50199
taxonIdCalais016	PlotCalais02_La20La40998Lo43Lo50199	Itacolomi State Park, Calais, MG, Brazil	BR	present	native	2008-10-21T09:26Z	http://dx.doi.org/10.5539/enrr.v2n3p189	taxonIdCalais016_PlotC02/decimalLatitude/-20.40998/decimalLongitude/-43.50199
taxonIdCalais017	PlotCalais02_La20La40998Lo43Lo50199	Itacolomi State Park, Calais, MG, Brazil	BR	present	native	2008-10-21T09:26Z	http://dx.doi.org/10.5539/enrr.v2n3p198	taxonIdCalais017_PlotC02/decimalLatitude/-20.40998/decimalLongitude/-43.50199
taxonIdCalais021	PlotCalais02_La20La40998Lo43Lo50199	Itacolomi State Park, Calais, MG, Brazil	BR	present	native	2008-10-21T09:26Z	http://dx.doi.org/10.5539/enrr.v2n3p215	taxonIdCalais021_PlotC02/decimalLatitude/-20.40998/decimalLongitude/-43.50199
taxonIdCalais022	PlotCalais02_La20La40998Lo43Lo50199	Itacolomi State Park, Calais, MG, Brazil	BR	present	native	2008-10-21T09:26Z	http://dx.doi.org/10.5539/enrr.v2n3p217	taxonIdCalais022_PlotC02/decimalLatitude/-20.40998/decimalLongitude/-43.50199
taxonIdCalais023	PlotCalais02_La20La40998Lo43Lo50199	Itacolomi State Park, Calais, MG, Brazil	BR	present	native	2008-10-21T09:26Z	http://dx.doi.org/10.5539/enrr.v2n3p228	taxonIdCalais023_PlotC02/decimalLatitude/-20.40998/decimalLongitude/-43.50199
taxonIdCalais034	PlotCalais02_La20La40998Lo43Lo50199	Itacolomi State Park, Calais, MG, Brazil	BR	present	native	2008-10-21T09:26Z	http://dx.doi.org/10.5539/enrr.v2n3p259	taxonIdCalais034_PlotC02/decimalLatitude/-20.40998/decimalLongitude/-43.50199
taxonIdCalais040	PlotCalais02_La20La40998Lo43Lo50199	Itacolomi State Park, Calais, MG, Brazil	BR	present	native	2008-10-21T09:26Z	http://dx.doi.org/10.5539/enrr.v2n3p279	taxonIdCalais040_PlotC02/decimalLatitude/-20.40998/decimalLongitude/-43.50199
taxonIdCalais042	PlotCalais02_La20La40998Lo43Lo50199	Itacolomi State Park, Calais, MG, Brazil	BR	present	native	2008-10-21T09:26Z	http://dx.doi.org/10.5539/enrr.v2n3p288	taxonIdCalais042_PlotC02/decimalLatitude/-20.40998/decimalLongitude/-43.50199
taxonIdCalais044	PlotCalais02_La20La40998Lo43Lo50199	Itacolomi State Park, Calais, MG, Brazil	BR	present	native	2008-10-21T09:26Z	http://dx.doi.org/10.5539/enrr.v2n3p293	taxonIdCalais044_PlotC02/decimalLatitude/-20.40998/decimalLongitude/-43.50199
taxonIdCalais045	PlotCalais02_La20La40998Lo43Lo50199	Itacolomi State Park, Calais, MG, Brazil	BR	present	native	2008-10-21T09:26Z	http://dx.doi.org/10.5539/enrr.v2n3p301	taxonIdCalais045_PlotC02/decimalLatitude/-20.40998/decimalLongitude/-43.50199
taxonIdCalais051	PlotCalais02_La20La40998Lo43Lo50199	Itacolomi State Park, Calais, MG, Brazil	BR	present	native	2008-10-21T09:26Z	http://dx.doi.org/10.5539/enrr.v2n3p318	taxonIdCalais051_PlotC02/decimalLatitude/-20.40998/decimalLongitude/-43.50199
taxonIdCalais052	PlotCalais02_La20La40998Lo43Lo50199	Itacolomi State Park, Calais, MG, Brazil	BR	present	native	2008-10-21T09:26Z	http://dx.doi.org/10.5539/enrr.v2n3p325	taxonIdCalais052_PlotC02/decimalLatitude/-20.40998/decimalLongitude/-43.50199
taxonIdCalais062	PlotCalais02_La20La40998Lo43Lo50199	Itacolomi State Park, Calais, MG, Brazil	BR	present	native	2008-10-21T09:26Z	http://dx.doi.org/10.5539/enrr.v2n3p354	taxonIdCalais062_PlotC02/decimalLatitude/-20.40998/decimalLongitude/-43.50199
taxonIdCalais063	PlotCalais02_La20La40998Lo43Lo50199	Itacolomi State Park, Calais, MG, Brazil	BR	present	native	2008-10-21T09:26Z	http://dx.doi.org/10.5539/enrr.v2n3p364	taxonIdCalais063_PlotC02/decimalLatitude/-20.40998/decimalLongitude/-43.50199
taxonIdCalais066	PlotCalais02_La20La40998Lo43Lo50199	Itacolomi State Park, Calais, MG, Brazil	BR	present	native	2008-10-21T09:26Z	http://dx.doi.org/10.5539/enrr.v2n3p377	taxonIdCalais066_PlotC02/decimalLatitude/-20.40998/decimalLongitude/-43.50199
taxonIdCalais067	PlotCalais02_La20La40998Lo43Lo50199	Itacolomi State Park, Calais, MG, Brazil	BR	present	native	2008-10-21T09:26Z	http://dx.doi.org/10.5539/enrr.v2n3p387	taxonIdCalais067_PlotC02/decimalLatitude/-20.40998/decimalLongitude/-43.50199
taxonIdCalais068	PlotCalais02_La20La40998Lo43Lo50199	Itacolomi State Park, Calais, MG, Brazil	BR	present	native	2008-10-21T09:26Z	http://dx.doi.org/10.5539/enrr.v2n3p392	taxonIdCalais068_PlotC02/decimalLatitude/-20.40998/decimalLongitude/-43.50199
taxonIdCalais069	PlotCalais02_La20La40998Lo43Lo50199	Itacolomi State Park, Calais, MG, Brazil	BR	present	native	2008-10-21T09:26Z	http://dx.doi.org/10.5539/enrr.v2n3p403	taxonIdCalais069_PlotC02/decimalLatitude/-20.40998/decimalLongitude/-43.50199
taxonIdCalais074	PlotCalais02_La20La40998Lo43Lo50199	Itacolomi State Park, Calais, MG, Brazil	BR	present	native	2008-10-21T09:26Z	http://dx.doi.org/10.5539/enrr.v2n3p417	taxonIdCalais074_PlotC02/decimalLatitude/-20.40998/decimalLongitude/-43.50199
taxonIdCalais076	PlotCalais02_La20La40998Lo43Lo50199	Itacolomi State Park, Calais, MG, Brazil	BR	present	native	2008-10-21T09:26Z	http://dx.doi.org/10.5539/enrr.v2n3p432	taxonIdCalais076_PlotC02/decimalLatitude/-20.40998/decimalLongitude/-43.50199
taxonIdCalais078	PlotCalais02_La20La40998Lo43Lo50199	Itacolomi State Park, Calais, MG, Brazil	BR	present	native	2008-10-21T09:26Z	http://dx.doi.org/10.5539/enrr.v2n3p447	taxonIdCalais078_PlotC02/decimalLatitude/-20.40998/decimalLongitude/-43.50199
taxonIdCalais081	PlotCalais02_La20La40998Lo43Lo50199	Itacolomi State Park, Calais, MG, Brazil	BR	present	invasive	2008-10-21T09:26Z	http://dx.doi.org/10.5539/enrr.v2n3p464	taxonIdCalais081_PlotC02/decimalLatitude/-20.40998/decimalLongitude/-43.50199
taxonIdCalais083	PlotCalais02_La20La40998Lo43Lo50199	Itacolomi State Park, Calais, MG, Brazil	BR	present	native	2008-10-21T09:26Z	http://dx.doi.org/10.5539/enrr.v2n3p483	taxonIdCalais083_PlotC02/decimalLatitude/-20.40998/decimalLongitude/-43.50199
taxonIdCalais084	PlotCalais02_La20La40998Lo43Lo50199	Itacolomi State Park, Calais, MG, Brazil	BR	present	native	2008-10-21T09:26Z	http://dx.doi.org/10.5539/enrr.v2n3p494	taxonIdCalais084_PlotC02/decimalLatitude/-20.40998/decimalLongitude/-43.50199
taxonIdCalais087	PlotCalais02_La20La40998Lo43Lo50199	Itacolomi State Park, Calais, MG, Brazil	BR	present	native	2008-10-21T09:26Z	http://dx.doi.org/10.5539/enrr.v2n3p505	taxonIdCalais087_PlotC02/decimalLatitude/-20.40998/decimalLongitude/-43.50199
taxonIdCalais097	PlotCalais02_La20La40998Lo43Lo50199	Itacolomi State Park, Calais, MG, Brazil	BR	present	native	2008-10-21T09:26Z	http://dx.doi.org/10.5539/enrr.v2n3p535	taxonIdCalais097_PlotC02/decimalLatitude/-20.40998/decimalLongitude/-43.50199
taxonIdCalais101	PlotCalais02_La20La40998Lo43Lo50199	Itacolomi State Park, Calais, MG, Brazil	BR	present	native	2008-10-21T09:26Z	http://dx.doi.org/10.5539/enrr.v2n3p561	taxonIdCalais101_PlotC02/decimalLatitude/-20.40998/decimalLongitude/-43.50199
taxonIdCalais107	PlotCalais02_La20La40998Lo43Lo50199	Itacolomi State Park, Calais, MG, Brazil	BR	present	native	2008-10-21T09:26Z	http://dx.doi.org/10.5539/enrr.v2n3p589	taxonIdCalais107_PlotC02/decimalLatitude/-20.40998/decimalLongitude/-43.50199
taxonIdCalais006	PlotCalais03_La20La40983Lo43Lo50188	Itacolomi State Park, Calais, MG, Brazil	BR	present	native	2008-10-21T09:26Z	http://dx.doi.org/10.5539/enrr.v2n3p125	taxonIdCalais006_PlotC03/decimalLatitude/-20.40983/decimalLongitude/-43.50188
taxonIdCalais007	PlotCalais03_La20La40983Lo43Lo50188	Itacolomi State Park, Calais, MG, Brazil	BR	present	native	2008-10-21T09:26Z	http://dx.doi.org/10.5539/enrr.v2n3p131	taxonIdCalais007_PlotC03/decimalLatitude/-20.40983/decimalLongitude/-43.50188
taxonIdCalais008	PlotCalais03_La20La40983Lo43Lo50188	Itacolomi State Park, Calais, MG, Brazil	BR	present	native	2008-10-21T09:26Z	http://dx.doi.org/10.5539/enrr.v2n3p139	taxonIdCalais008_PlotC03/decimalLatitude/-20.40983/decimalLongitude/-43.50188
taxonIdCalais010	PlotCalais03_La20La40983Lo43Lo50188	Itacolomi State Park, Calais, MG, Brazil	BR	present	native	2008-10-21T09:26Z	http://dx.doi.org/10.5539/enrr.v2n3p147	taxonIdCalais010_PlotC03/decimalLatitude/-20.40983/decimalLongitude/-43.50188
taxonIdCalais011	PlotCalais03_La20La40983Lo43Lo50188	Itacolomi State Park, Calais, MG, Brazil	BR	present	native	2008-10-21T09:26Z	http://dx.doi.org/10.5539/enrr.v2n3p159	taxonIdCalais011_PlotC03/decimalLatitude/-20.40983/decimalLongitude/-43.50188
taxonIdCalais013	PlotCalais03_La20La40983Lo43Lo50188	Itacolomi State Park, Calais, MG, Brazil	BR	present	native	2008-10-21T09:26Z	http://dx.doi.org/10.5539/enrr.v2n3p170	taxonIdCalais013_PlotC03/decimalLatitude/-20.40983/decimalLongitude/-43.50188
taxonIdCalais014	PlotCalais03_La20La40983Lo43Lo50188	Itacolomi State Park, Calais, MG, Brazil	BR	present	native	2008-10-21T09:26Z	http://dx.doi.org/10.5539/enrr.v2n3p174	taxonIdCalais014_PlotC03/decimalLatitude/-20.40983/decimalLongitude/-43.50188
taxonIdCalais015	PlotCalais03_La20La40983Lo43Lo50188	Itacolomi State Park, Calais, MG, Brazil	BR	present	native	2008-10-21T09:26Z	http://dx.doi.org/10.5539/enrr.v2n3p182	taxonIdCalais015_PlotC03/decimalLatitude/-20.40983/decimalLongitude/-43.50188
taxonIdCalais016	PlotCalais03_La20La40983Lo43Lo50188	Itacolomi State Park, Calais, MG, Brazil	BR	present	native	2008-10-21T09:26Z	http://dx.doi.org/10.5539/enrr.v2n3p190	taxonIdCalais016_PlotC03/decimalLatitude/-20.40983/decimalLongitude/-43.50188
taxonIdCalais020	PlotCalais03_La20La40983Lo43Lo50188	Itacolomi State Park, Calais, MG, Brazil	BR	present	native	2008-10-21T09:26Z	http://dx.doi.org/10.5539/enrr.v2n3p206	taxonIdCalais020_PlotC03/decimalLatitude/-20.40983/decimalLongitude/-43.50188
taxonIdCalais022	PlotCalais03_La20La40983Lo43Lo50188	Itacolomi State Park, Calais, MG, Brazil	BR	present	native	2008-10-21T09:26Z	http://dx.doi.org/10.5539/enrr.v2n3p218	taxonIdCalais022_PlotC03/decimalLatitude/-20.40983/decimalLongitude/-43.50188
taxonIdCalais025	PlotCalais03_La20La40983Lo43Lo50188	Itacolomi State Park, Calais, MG, Brazil	BR	present	native	2008-10-21T09:26Z	http://dx.doi.org/10.5539/enrr.v2n3p232	taxonIdCalais025_PlotC03/decimalLatitude/-20.40983/decimalLongitude/-43.50188
taxonIdCalais026	PlotCalais03_La20La40983Lo43Lo50188	Itacolomi State Park, Calais, MG, Brazil	BR	present	native	2008-10-21T09:26Z	http://dx.doi.org/10.5539/enrr.v2n3p235	taxonIdCalais026_PlotC03/decimalLatitude/-20.40983/decimalLongitude/-43.50188
taxonIdCalais028	PlotCalais03_La20La40983Lo43Lo50188	Itacolomi State Park, Calais, MG, Brazil	BR	present	native	2008-10-21T09:26Z	http://dx.doi.org/10.5539/enrr.v2n3p246	taxonIdCalais028_PlotC03/decimalLatitude/-20.40983/decimalLongitude/-43.50188
taxonIdCalais030	PlotCalais03_La20La40983Lo43Lo50188	Itacolomi State Park, Calais, MG, Brazil	BR	present	native	2008-10-21T09:26Z	http://dx.doi.org/10.5539/enrr.v2n3p252	taxonIdCalais030_PlotC03/decimalLatitude/-20.40983/decimalLongitude/-43.50188
taxonIdCalais031	PlotCalais03_La20La40983Lo43Lo50188	Itacolomi State Park, Calais, MG, Brazil	BR	present	native	2008-10-21T09:26Z	http://dx.doi.org/10.5539/enrr.v2n3p253	taxonIdCalais031_PlotC03/decimalLatitude/-20.40983/decimalLongitude/-43.50188
taxonIdCalais039	PlotCalais03_La20La40983Lo43Lo50188	Itacolomi State Park, Calais, MG, Brazil	BR	present	native	2008-10-21T09:26Z	http://dx.doi.org/10.5539/enrr.v2n3p276	taxonIdCalais039_PlotC03/decimalLatitude/-20.40983/decimalLongitude/-43.50188
taxonIdCalais042	PlotCalais03_La20La40983Lo43Lo50188	Itacolomi State Park, Calais, MG, Brazil	BR	present	native	2008-10-21T09:26Z	http://dx.doi.org/10.5539/enrr.v2n3p289	taxonIdCalais042_PlotC03/decimalLatitude/-20.40983/decimalLongitude/-43.50188
taxonIdCalais043	PlotCalais03_La20La40983Lo43Lo50188	Itacolomi State Park, Calais, MG, Brazil	BR	present	native	2008-10-21T09:26Z	http://dx.doi.org/10.5539/enrr.v2n3p291	taxonIdCalais043_PlotC03/decimalLatitude/-20.40983/decimalLongitude/-43.50188
taxonIdCalais044	PlotCalais03_La20La40983Lo43Lo50188	Itacolomi State Park, Calais, MG, Brazil	BR	present	native	2008-10-21T09:26Z	http://dx.doi.org/10.5539/enrr.v2n3p294	taxonIdCalais044_PlotC03/decimalLatitude/-20.40983/decimalLongitude/-43.50188
taxonIdCalais045	PlotCalais03_La20La40983Lo43Lo50188	Itacolomi State Park, Calais, MG, Brazil	BR	present	native	2008-10-21T09:26Z	http://dx.doi.org/10.5539/enrr.v2n3p302	taxonIdCalais045_PlotC03/decimalLatitude/-20.40983/decimalLongitude/-43.50188
taxonIdCalais051	PlotCalais03_La20La40983Lo43Lo50188	Itacolomi State Park, Calais, MG, Brazil	BR	present	native	2008-10-21T09:26Z	http://dx.doi.org/10.5539/enrr.v2n3p319	taxonIdCalais051_PlotC03/decimalLatitude/-20.40983/decimalLongitude/-43.50188
taxonIdCalais052	PlotCalais03_La20La40983Lo43Lo50188	Itacolomi State Park, Calais, MG, Brazil	BR	present	native	2008-10-21T09:26Z	http://dx.doi.org/10.5539/enrr.v2n3p326	taxonIdCalais052_PlotC03/decimalLatitude/-20.40983/decimalLongitude/-43.50188
taxonIdCalais054	PlotCalais03_La20La40983Lo43Lo50188	Itacolomi State Park, Calais, MG, Brazil	BR	present	native	2008-10-21T09:26Z	http://dx.doi.org/10.5539/enrr.v2n3p331	taxonIdCalais054_PlotC03/decimalLatitude/-20.40983/decimalLongitude/-43.50188
taxonIdCalais055	PlotCalais03_La20La40983Lo43Lo50188	Itacolomi State Park, Calais, MG, Brazil	BR	present	native	2008-10-21T09:26Z	http://dx.doi.org/10.5539/enrr.v2n3p334	taxonIdCalais055_PlotC03/decimalLatitude/-20.40983/decimalLongitude/-43.50188
taxonIdCalais056	PlotCalais03_La20La40983Lo43Lo50188	Itacolomi State Park, Calais, MG, Brazil	BR	present	native	2008-10-21T09:26Z	http://dx.doi.org/10.5539/enrr.v2n3p336	taxonIdCalais056_PlotC03/decimalLatitude/-20.40983/decimalLongitude/-43.50188
taxonIdCalais057	PlotCalais03_La20La40983Lo43Lo50188	Itacolomi State Park, Calais, MG, Brazil	BR	present	native	2008-10-21T09:26Z	http://dx.doi.org/10.5539/enrr.v2n3p343	taxonIdCalais057_PlotC03/decimalLatitude/-20.40983/decimalLongitude/-43.50188
taxonIdCalais059	PlotCalais03_La20La40983Lo43Lo50188	Itacolomi State Park, Calais, MG, Brazil	BR	present	native	2008-10-21T09:26Z	http://dx.doi.org/10.5539/enrr.v2n3p346	taxonIdCalais059_PlotC03/decimalLatitude/-20.40983/decimalLongitude/-43.50188
taxonIdCalais062	PlotCalais03_La20La40983Lo43Lo50188	Itacolomi State Park, Calais, MG, Brazil	BR	present	native	2008-10-21T09:26Z	http://dx.doi.org/10.5539/enrr.v2n3p355	taxonIdCalais062_PlotC03/decimalLatitude/-20.40983/decimalLongitude/-43.50188
taxonIdCalais063	PlotCalais03_La20La40983Lo43Lo50188	Itacolomi State Park, Calais, MG, Brazil	BR	present	native	2008-10-21T09:26Z	http://dx.doi.org/10.5539/enrr.v2n3p365	taxonIdCalais063_PlotC03/decimalLatitude/-20.40983/decimalLongitude/-43.50188
taxonIdCalais064	PlotCalais03_La20La40983Lo43Lo50188	Itacolomi State Park, Calais, MG, Brazil	BR	present	native	2008-10-21T09:26Z	http://dx.doi.org/10.5539/enrr.v2n3p369	taxonIdCalais064_PlotC03/decimalLatitude/-20.40983/decimalLongitude/-43.50188
taxonIdCalais067	PlotCalais03_La20La40983Lo43Lo50188	Itacolomi State Park, Calais, MG, Brazil	BR	present	native	2008-10-21T09:26Z	http://dx.doi.org/10.5539/enrr.v2n3p388	taxonIdCalais067_PlotC03/decimalLatitude/-20.40983/decimalLongitude/-43.50188
taxonIdCalais068	PlotCalais03_La20La40983Lo43Lo50188	Itacolomi State Park, Calais, MG, Brazil	BR	present	native	2008-10-21T09:26Z	http://dx.doi.org/10.5539/enrr.v2n3p393	taxonIdCalais068_PlotC03/decimalLatitude/-20.40983/decimalLongitude/-43.50188
taxonIdCalais070	PlotCalais03_La20La40983Lo43Lo50188	Itacolomi State Park, Calais, MG, Brazil	BR	present	native	2008-10-21T09:26Z	http://dx.doi.org/10.5539/enrr.v2n3p408	taxonIdCalais070_PlotC03/decimalLatitude/-20.40983/decimalLongitude/-43.50188
taxonIdCalais071	PlotCalais03_La20La40983Lo43Lo50188	Itacolomi State Park, Calais, MG, Brazil	BR	present	native	2008-10-21T09:26Z	http://dx.doi.org/10.5539/enrr.v2n3p413	taxonIdCalais071_PlotC03/decimalLatitude/-20.40983/decimalLongitude/-43.50188
taxonIdCalais072	PlotCalais03_La20La40983Lo43Lo50188	Itacolomi State Park, Calais, MG, Brazil	BR	present	native	2008-10-21T09:26Z	http://dx.doi.org/10.5539/enrr.v2n3p414	taxonIdCalais072_PlotC03/decimalLatitude/-20.40983/decimalLongitude/-43.50188
taxonIdCalais074	PlotCalais03_La20La40983Lo43Lo50188	Itacolomi State Park, Calais, MG, Brazil	BR	present	native	2008-10-21T09:26Z	http://dx.doi.org/10.5539/enrr.v2n3p418	taxonIdCalais074_PlotC03/decimalLatitude/-20.40983/decimalLongitude/-43.50188
taxonIdCalais076	PlotCalais03_La20La40983Lo43Lo50188	Itacolomi State Park, Calais, MG, Brazil	BR	present	native	2008-10-21T09:26Z	http://dx.doi.org/10.5539/enrr.v2n3p433	taxonIdCalais076_PlotC03/decimalLatitude/-20.40983/decimalLongitude/-43.50188
taxonIdCalais078	PlotCalais03_La20La40983Lo43Lo50188	Itacolomi State Park, Calais, MG, Brazil	BR	present	native	2008-10-21T09:26Z	http://dx.doi.org/10.5539/enrr.v2n3p448	taxonIdCalais078_PlotC03/decimalLatitude/-20.40983/decimalLongitude/-43.50188
taxonIdCalais081	PlotCalais03_La20La40983Lo43Lo50188	Itacolomi State Park, Calais, MG, Brazil	BR	present	invasive	2008-10-21T09:26Z	http://dx.doi.org/10.5539/enrr.v2n3p465	taxonIdCalais081_PlotC03/decimalLatitude/-20.40983/decimalLongitude/-43.50188
taxonIdCalais082	PlotCalais03_La20La40983Lo43Lo50188	Itacolomi State Park, Calais, MG, Brazil	BR	present	native	2008-10-21T09:26Z	http://dx.doi.org/10.5539/enrr.v2n3p476	taxonIdCalais082_PlotC03/decimalLatitude/-20.40983/decimalLongitude/-43.50188
taxonIdCalais083	PlotCalais03_La20La40983Lo43Lo50188	Itacolomi State Park, Calais, MG, Brazil	BR	present	native	2008-10-21T09:26Z	http://dx.doi.org/10.5539/enrr.v2n3p484	taxonIdCalais083_PlotC03/decimalLatitude/-20.40983/decimalLongitude/-43.50188
taxonIdCalais093	PlotCalais03_La20La40983Lo43Lo50188	Itacolomi State Park, Calais, MG, Brazil	BR	present	native	2008-10-21T09:26Z	http://dx.doi.org/10.5539/enrr.v2n3p522	taxonIdCalais093_PlotC03/decimalLatitude/-20.40983/decimalLongitude/-43.50188
taxonIdCalais097	PlotCalais03_La20La40983Lo43Lo50188	Itacolomi State Park, Calais, MG, Brazil	BR	present	native	2008-10-21T09:26Z	http://dx.doi.org/10.5539/enrr.v2n3p536	taxonIdCalais097_PlotC03/decimalLatitude/-20.40983/decimalLongitude/-43.50188
taxonIdCalais099	PlotCalais03_La20La40983Lo43Lo50188	Itacolomi State Park, Calais, MG, Brazil	BR	present	native	2008-10-21T09:26Z	http://dx.doi.org/10.5539/enrr.v2n3p547	taxonIdCalais099_PlotC03/decimalLatitude/-20.40983/decimalLongitude/-43.50188
taxonIdCalais100	PlotCalais03_La20La40983Lo43Lo50188	Itacolomi State Park, Calais, MG, Brazil	BR	present	native	2008-10-21T09:26Z	http://dx.doi.org/10.5539/enrr.v2n3p549	taxonIdCalais100_PlotC03/decimalLatitude/-20.40983/decimalLongitude/-43.50188
taxonIdCalais101	PlotCalais03_La20La40983Lo43Lo50188	Itacolomi State Park, Calais, MG, Brazil	BR	present	native	2008-10-21T09:26Z	http://dx.doi.org/10.5539/enrr.v2n3p562	taxonIdCalais101_PlotC03/decimalLatitude/-20.40983/decimalLongitude/-43.50188
taxonIdCalais102	PlotCalais03_La20La40983Lo43Lo50188	Itacolomi State Park, Calais, MG, Brazil	BR	present	native	2008-10-21T09:26Z	http://dx.doi.org/10.5539/enrr.v2n3p570	taxonIdCalais102_PlotC03/decimalLatitude/-20.40983/decimalLongitude/-43.50188
taxonIdCalais106	PlotCalais03_La20La40983Lo43Lo50188	Itacolomi State Park, Calais, MG, Brazil	BR	present	native	2008-10-21T09:26Z	http://dx.doi.org/10.5539/enrr.v2n3p583	taxonIdCalais106_PlotC03/decimalLatitude/-20.40983/decimalLongitude/-43.50188
taxonIdCalais107	PlotCalais03_La20La40983Lo43Lo50188	Itacolomi State Park, Calais, MG, Brazil	BR	present	native	2008-10-21T09:26Z	http://dx.doi.org/10.5539/enrr.v2n3p590	taxonIdCalais107_PlotC03/decimalLatitude/-20.40983/decimalLongitude/-43.50188
taxonIdCalais001	PlotCalais04_La20La40965Lo43Lo50181	Itacolomi State Park, Calais, MG, Brazil	BR	present	native	2008-10-21T09:26Z	http://dx.doi.org/10.5539/enrr.v2n3p115	taxonIdCalais001_PlotC04/decimalLatitude/-20.40965/decimalLongitude/-43.50181
taxonIdCalais004	PlotCalais04_La20La40965Lo43Lo50181	Itacolomi State Park, Calais, MG, Brazil	BR	present	native	2008-10-21T09:26Z	http://dx.doi.org/10.5539/enrr.v2n3p119	taxonIdCalais004_PlotC04/decimalLatitude/-20.40965/decimalLongitude/-43.50181
taxonIdCalais008	PlotCalais04_La20La40965Lo43Lo50181	Itacolomi State Park, Calais, MG, Brazil	BR	present	native	2008-10-21T09:26Z	http://dx.doi.org/10.5539/enrr.v2n3p140	taxonIdCalais008_PlotC04/decimalLatitude/-20.40965/decimalLongitude/-43.50181
taxonIdCalais011	PlotCalais04_La20La40965Lo43Lo50181	Itacolomi State Park, Calais, MG, Brazil	BR	present	native	2008-10-21T09:26Z	http://dx.doi.org/10.5539/enrr.v2n3p160	taxonIdCalais011_PlotC04/decimalLatitude/-20.40965/decimalLongitude/-43.50181
taxonIdCalais015	PlotCalais04_La20La40965Lo43Lo50181	Itacolomi State Park, Calais, MG, Brazil	BR	present	native	2008-10-21T09:26Z	http://dx.doi.org/10.5539/enrr.v2n3p183	taxonIdCalais015_PlotC04/decimalLatitude/-20.40965/decimalLongitude/-43.50181
taxonIdCalais016	PlotCalais04_La20La40965Lo43Lo50181	Itacolomi State Park, Calais, MG, Brazil	BR	present	native	2008-10-21T09:26Z	http://dx.doi.org/10.5539/enrr.v2n3p191	taxonIdCalais016_PlotC04/decimalLatitude/-20.40965/decimalLongitude/-43.50181
taxonIdCalais018	PlotCalais04_La20La40965Lo43Lo50181	Itacolomi State Park, Calais, MG, Brazil	BR	present	native	2008-10-21T09:26Z	http://dx.doi.org/10.5539/enrr.v2n3p200	taxonIdCalais018_PlotC04/decimalLatitude/-20.40965/decimalLongitude/-43.50181
taxonIdCalais020	PlotCalais04_La20La40965Lo43Lo50181	Itacolomi State Park, Calais, MG, Brazil	BR	present	native	2008-10-21T09:26Z	http://dx.doi.org/10.5539/enrr.v2n3p207	taxonIdCalais020_PlotC04/decimalLatitude/-20.40965/decimalLongitude/-43.50181
taxonIdCalais025	PlotCalais04_La20La40965Lo43Lo50181	Itacolomi State Park, Calais, MG, Brazil	BR	present	native	2008-10-21T09:26Z	http://dx.doi.org/10.5539/enrr.v2n3p233	taxonIdCalais025_PlotC04/decimalLatitude/-20.40965/decimalLongitude/-43.50181
taxonIdCalais026	PlotCalais04_La20La40965Lo43Lo50181	Itacolomi State Park, Calais, MG, Brazil	BR	present	native	2008-10-21T09:26Z	http://dx.doi.org/10.5539/enrr.v2n3p236	taxonIdCalais026_PlotC04/decimalLatitude/-20.40965/decimalLongitude/-43.50181
taxonIdCalais027	PlotCalais04_La20La40965Lo43Lo50181	Itacolomi State Park, Calais, MG, Brazil	BR	present	native	2008-10-21T09:26Z	http://dx.doi.org/10.5539/enrr.v2n3p245	taxonIdCalais027_PlotC04/decimalLatitude/-20.40965/decimalLongitude/-43.50181
taxonIdCalais028	PlotCalais04_La20La40965Lo43Lo50181	Itacolomi State Park, Calais, MG, Brazil	BR	present	native	2008-10-21T09:26Z	http://dx.doi.org/10.5539/enrr.v2n3p247	taxonIdCalais028_PlotC04/decimalLatitude/-20.40965/decimalLongitude/-43.50181
taxonIdCalais029	PlotCalais04_La20La40965Lo43Lo50181	Itacolomi State Park, Calais, MG, Brazil	BR	present	native	2008-10-21T09:26Z	http://dx.doi.org/10.5539/enrr.v2n3p249	taxonIdCalais029_PlotC04/decimalLatitude/-20.40965/decimalLongitude/-43.50181
taxonIdCalais031	PlotCalais04_La20La40965Lo43Lo50181	Itacolomi State Park, Calais, MG, Brazil	BR	present	native	2008-10-21T09:26Z	http://dx.doi.org/10.5539/enrr.v2n3p254	taxonIdCalais031_PlotC04/decimalLatitude/-20.40965/decimalLongitude/-43.50181
taxonIdCalais034	PlotCalais04_La20La40965Lo43Lo50181	Itacolomi State Park, Calais, MG, Brazil	BR	present	native	2008-10-21T09:26Z	http://dx.doi.org/10.5539/enrr.v2n3p260	taxonIdCalais034_PlotC04/decimalLatitude/-20.40965/decimalLongitude/-43.50181
taxonIdCalais035	PlotCalais04_La20La40965Lo43Lo50181	Itacolomi State Park, Calais, MG, Brazil	BR	present	native	2008-10-21T09:26Z	http://dx.doi.org/10.5539/enrr.v2n3p265	taxonIdCalais035_PlotC04/decimalLatitude/-20.40965/decimalLongitude/-43.50181
taxonIdCalais044	PlotCalais04_La20La40965Lo43Lo50181	Itacolomi State Park, Calais, MG, Brazil	BR	present	native	2008-10-21T09:26Z	http://dx.doi.org/10.5539/enrr.v2n3p295	taxonIdCalais044_PlotC04/decimalLatitude/-20.40965/decimalLongitude/-43.50181
taxonIdCalais047	PlotCalais04_La20La40965Lo43Lo50181	Itacolomi State Park, Calais, MG, Brazil	BR	present	native	2008-10-21T09:26Z	http://dx.doi.org/10.5539/enrr.v2n3p305	taxonIdCalais047_PlotC04/decimalLatitude/-20.40965/decimalLongitude/-43.50181
taxonIdCalais052	PlotCalais04_La20La40965Lo43Lo50181	Itacolomi State Park, Calais, MG, Brazil	BR	present	native	2008-10-21T09:26Z	http://dx.doi.org/10.5539/enrr.v2n3p327	taxonIdCalais052_PlotC04/decimalLatitude/-20.40965/decimalLongitude/-43.50181
taxonIdCalais053	PlotCalais04_La20La40965Lo43Lo50181	Itacolomi State Park, Calais, MG, Brazil	BR	present	native	2008-10-21T09:26Z	http://dx.doi.org/10.5539/enrr.v2n3p330	taxonIdCalais053_PlotC04/decimalLatitude/-20.40965/decimalLongitude/-43.50181
taxonIdCalais058	PlotCalais04_La20La40965Lo43Lo50181	Itacolomi State Park, Calais, MG, Brazil	BR	present	native	2008-10-21T09:26Z	http://dx.doi.org/10.5539/enrr.v2n3p345	taxonIdCalais058_PlotC04/decimalLatitude/-20.40965/decimalLongitude/-43.50181
taxonIdCalais063	PlotCalais04_La20La40965Lo43Lo50181	Itacolomi State Park, Calais, MG, Brazil	BR	present	native	2008-10-21T09:26Z	http://dx.doi.org/10.5539/enrr.v2n3p366	taxonIdCalais063_PlotC04/decimalLatitude/-20.40965/decimalLongitude/-43.50181
taxonIdCalais073	PlotCalais04_La20La40965Lo43Lo50181	Itacolomi State Park, Calais, MG, Brazil	BR	present	native	2008-10-21T09:26Z	http://dx.doi.org/10.5539/enrr.v2n3p415	taxonIdCalais073_PlotC04/decimalLatitude/-20.40965/decimalLongitude/-43.50181
taxonIdCalais074	PlotCalais04_La20La40965Lo43Lo50181	Itacolomi State Park, Calais, MG, Brazil	BR	present	native	2008-10-21T09:26Z	http://dx.doi.org/10.5539/enrr.v2n3p419	taxonIdCalais074_PlotC04/decimalLatitude/-20.40965/decimalLongitude/-43.50181
taxonIdCalais076	PlotCalais04_La20La40965Lo43Lo50181	Itacolomi State Park, Calais, MG, Brazil	BR	present	native	2008-10-21T09:26Z	http://dx.doi.org/10.5539/enrr.v2n3p434	taxonIdCalais076_PlotC04/decimalLatitude/-20.40965/decimalLongitude/-43.50181
taxonIdCalais081	PlotCalais04_La20La40965Lo43Lo50181	Itacolomi State Park, Calais, MG, Brazil	BR	present	invasive	2008-10-21T09:26Z	http://dx.doi.org/10.5539/enrr.v2n3p466	taxonIdCalais081_PlotC04/decimalLatitude/-20.40965/decimalLongitude/-43.50181
taxonIdCalais084	PlotCalais04_La20La40965Lo43Lo50181	Itacolomi State Park, Calais, MG, Brazil	BR	present	native	2008-10-21T09:26Z	http://dx.doi.org/10.5539/enrr.v2n3p495	taxonIdCalais084_PlotC04/decimalLatitude/-20.40965/decimalLongitude/-43.50181
taxonIdCalais088	PlotCalais04_La20La40965Lo43Lo50181	Itacolomi State Park, Calais, MG, Brazil	BR	present	invasive	2008-10-21T09:26Z	http://dx.doi.org/10.5539/enrr.v2n3p506	taxonIdCalais088_PlotC04/decimalLatitude/-20.40965/decimalLongitude/-43.50181
taxonIdCalais092	PlotCalais04_La20La40965Lo43Lo50181	Itacolomi State Park, Calais, MG, Brazil	BR	present	native	2008-10-21T09:26Z	http://dx.doi.org/10.5539/enrr.v2n3p519	taxonIdCalais092_PlotC04/decimalLatitude/-20.40965/decimalLongitude/-43.50181
taxonIdCalais093	PlotCalais04_La20La40965Lo43Lo50181	Itacolomi State Park, Calais, MG, Brazil	BR	present	native	2008-10-21T09:26Z	http://dx.doi.org/10.5539/enrr.v2n3p523	taxonIdCalais093_PlotC04/decimalLatitude/-20.40965/decimalLongitude/-43.50181
taxonIdCalais095	PlotCalais04_La20La40965Lo43Lo50181	Itacolomi State Park, Calais, MG, Brazil	BR	present	native	2008-10-21T09:26Z	http://dx.doi.org/10.5539/enrr.v2n3p532	taxonIdCalais095_PlotC04/decimalLatitude/-20.40965/decimalLongitude/-43.50181
taxonIdCalais097	PlotCalais04_La20La40965Lo43Lo50181	Itacolomi State Park, Calais, MG, Brazil	BR	present	native	2008-10-21T09:26Z	http://dx.doi.org/10.5539/enrr.v2n3p537	taxonIdCalais097_PlotC04/decimalLatitude/-20.40965/decimalLongitude/-43.50181
taxonIdCalais098	PlotCalais04_La20La40965Lo43Lo50181	Itacolomi State Park, Calais, MG, Brazil	BR	present	native	2008-10-21T09:26Z	http://dx.doi.org/10.5539/enrr.v2n3p545	taxonIdCalais098_PlotC04/decimalLatitude/-20.40965/decimalLongitude/-43.50181
taxonIdCalais100	PlotCalais04_La20La40965Lo43Lo50181	Itacolomi State Park, Calais, MG, Brazil	BR	present	native	2008-10-21T09:26Z	http://dx.doi.org/10.5539/enrr.v2n3p550	taxonIdCalais100_PlotC04/decimalLatitude/-20.40965/decimalLongitude/-43.50181
taxonIdCalais103	PlotCalais04_La20La40965Lo43Lo50181	Itacolomi State Park, Calais, MG, Brazil	BR	present	native	2008-10-21T09:26Z	http://dx.doi.org/10.5539/enrr.v2n3p572	taxonIdCalais103_PlotC04/decimalLatitude/-20.40965/decimalLongitude/-43.50181
taxonIdCalais104	PlotCalais04_La20La40965Lo43Lo50181	Itacolomi State Park, Calais, MG, Brazil	BR	present	native	2008-10-21T09:26Z	http://dx.doi.org/10.5539/enrr.v2n3p573	taxonIdCalais104_PlotC04/decimalLatitude/-20.40965/decimalLongitude/-43.50181
taxonIdCalais105	PlotCalais04_La20La40965Lo43Lo50181	Itacolomi State Park, Calais, MG, Brazil	BR	present	native	2008-10-21T09:26Z	http://dx.doi.org/10.5539/enrr.v2n3p580	taxonIdCalais105_PlotC04/decimalLatitude/-20.40965/decimalLongitude/-43.50181
taxonIdCalais106	PlotCalais04_La20La40965Lo43Lo50181	Itacolomi State Park, Calais, MG, Brazil	BR	present	native	2008-10-21T09:26Z	http://dx.doi.org/10.5539/enrr.v2n3p584	taxonIdCalais106_PlotC04/decimalLatitude/-20.40965/decimalLongitude/-43.50181
taxonIdCalais107	PlotCalais04_La20La40965Lo43Lo50181	Itacolomi State Park, Calais, MG, Brazil	BR	present	native	2008-10-21T09:26Z	http://dx.doi.org/10.5539/enrr.v2n3p591	taxonIdCalais107_PlotC04/decimalLatitude/-20.40965/decimalLongitude/-43.50181
taxonIdCalais001	PlotCalais05_La20La40948Lo43Lo50174	Itacolomi State Park, Calais, MG, Brazil	BR	present	native	2008-10-21T09:26Z	http://dx.doi.org/10.5539/enrr.v2n3p116	taxonIdCalais001_PlotC05/decimalLatitude/-20.40948/decimalLongitude/-43.50174
taxonIdCalais005	PlotCalais05_La20La40948Lo43Lo50174	Itacolomi State Park, Calais, MG, Brazil	BR	present	native	2008-10-21T09:26Z	http://dx.doi.org/10.5539/enrr.v2n3p123	taxonIdCalais005_PlotC05/decimalLatitude/-20.40948/decimalLongitude/-43.50174
taxonIdCalais010	PlotCalais05_La20La40948Lo43Lo50174	Itacolomi State Park, Calais, MG, Brazil	BR	present	native	2008-10-21T09:26Z	http://dx.doi.org/10.5539/enrr.v2n3p148	taxonIdCalais010_PlotC05/decimalLatitude/-20.40948/decimalLongitude/-43.50174
taxonIdCalais015	PlotCalais05_La20La40948Lo43Lo50174	Itacolomi State Park, Calais, MG, Brazil	BR	present	native	2008-10-21T09:26Z	http://dx.doi.org/10.5539/enrr.v2n3p184	taxonIdCalais015_PlotC05/decimalLatitude/-20.40948/decimalLongitude/-43.50174
taxonIdCalais018	PlotCalais05_La20La40948Lo43Lo50174	Itacolomi State Park, Calais, MG, Brazil	BR	present	native	2008-10-21T09:26Z	http://dx.doi.org/10.5539/enrr.v2n3p201	taxonIdCalais018_PlotC05/decimalLatitude/-20.40948/decimalLongitude/-43.50174
taxonIdCalais022	PlotCalais05_La20La40948Lo43Lo50174	Itacolomi State Park, Calais, MG, Brazil	BR	present	native	2008-10-21T09:26Z	http://dx.doi.org/10.5539/enrr.v2n3p219	taxonIdCalais022_PlotC05/decimalLatitude/-20.40948/decimalLongitude/-43.50174
taxonIdCalais026	PlotCalais05_La20La40948Lo43Lo50174	Itacolomi State Park, Calais, MG, Brazil	BR	present	native	2008-10-21T09:26Z	http://dx.doi.org/10.5539/enrr.v2n3p237	taxonIdCalais026_PlotC05/decimalLatitude/-20.40948/decimalLongitude/-43.50174
taxonIdCalais035	PlotCalais05_La20La40948Lo43Lo50174	Itacolomi State Park, Calais, MG, Brazil	BR	present	native	2008-10-21T09:26Z	http://dx.doi.org/10.5539/enrr.v2n3p266	taxonIdCalais035_PlotC05/decimalLatitude/-20.40948/decimalLongitude/-43.50174
taxonIdCalais039	PlotCalais05_La20La40948Lo43Lo50174	Itacolomi State Park, Calais, MG, Brazil	BR	present	native	2008-10-21T09:26Z	http://dx.doi.org/10.5539/enrr.v2n3p277	taxonIdCalais039_PlotC05/decimalLatitude/-20.40948/decimalLongitude/-43.50174
taxonIdCalais048	PlotCalais05_La20La40948Lo43Lo50174	Itacolomi State Park, Calais, MG, Brazil	BR	present	native	2008-10-21T09:26Z	http://dx.doi.org/10.5539/enrr.v2n3p306	taxonIdCalais048_PlotC05/decimalLatitude/-20.40948/decimalLongitude/-43.50174
taxonIdCalais049	PlotCalais05_La20La40948Lo43Lo50174	Itacolomi State Park, Calais, MG, Brazil	BR	present	native	2008-10-21T09:26Z	http://dx.doi.org/10.5539/enrr.v2n3p308	taxonIdCalais049_PlotC05/decimalLatitude/-20.40948/decimalLongitude/-43.50174
taxonIdCalais063	PlotCalais05_La20La40948Lo43Lo50174	Itacolomi State Park, Calais, MG, Brazil	BR	present	native	2008-10-21T09:26Z	http://dx.doi.org/10.5539/enrr.v2n3p367	taxonIdCalais063_PlotC05/decimalLatitude/-20.40948/decimalLongitude/-43.50174
taxonIdCalais074	PlotCalais05_La20La40948Lo43Lo50174	Itacolomi State Park, Calais, MG, Brazil	BR	present	native	2008-10-21T09:26Z	http://dx.doi.org/10.5539/enrr.v2n3p420	taxonIdCalais074_PlotC05/decimalLatitude/-20.40948/decimalLongitude/-43.50174
taxonIdCalais077	PlotCalais05_La20La40948Lo43Lo50174	Itacolomi State Park, Calais, MG, Brazil	BR	present	invasive	2008-10-21T09:26Z	http://dx.doi.org/10.5539/enrr.v2n3p444	taxonIdCalais077_PlotC05/decimalLatitude/-20.40948/decimalLongitude/-43.50174
taxonIdCalais083	PlotCalais05_La20La40948Lo43Lo50174	Itacolomi State Park, Calais, MG, Brazil	BR	present	native	2008-10-21T09:26Z	http://dx.doi.org/10.5539/enrr.v2n3p485	taxonIdCalais083_PlotC05/decimalLatitude/-20.40948/decimalLongitude/-43.50174
taxonIdCalais086	PlotCalais05_La20La40948Lo43Lo50174	Itacolomi State Park, Calais, MG, Brazil	BR	present	native	2008-10-21T09:26Z	http://dx.doi.org/10.5539/enrr.v2n3p497	taxonIdCalais086_PlotC05/decimalLatitude/-20.40948/decimalLongitude/-43.50174
taxonIdCalais097	PlotCalais05_La20La40948Lo43Lo50174	Itacolomi State Park, Calais, MG, Brazil	BR	present	native	2008-10-21T09:26Z	http://dx.doi.org/10.5539/enrr.v2n3p538	taxonIdCalais097_PlotC05/decimalLatitude/-20.40948/decimalLongitude/-43.50174
taxonIdCalais098	PlotCalais05_La20La40948Lo43Lo50174	Itacolomi State Park, Calais, MG, Brazil	BR	present	native	2008-10-21T09:26Z	http://dx.doi.org/10.5539/enrr.v2n3p546	taxonIdCalais098_PlotC05/decimalLatitude/-20.40948/decimalLongitude/-43.50174
taxonIdCalais100	PlotCalais05_La20La40948Lo43Lo50174	Itacolomi State Park, Calais, MG, Brazil	BR	present	native	2008-10-21T09:26Z	http://dx.doi.org/10.5539/enrr.v2n3p551	taxonIdCalais100_PlotC05/decimalLatitude/-20.40948/decimalLongitude/-43.50174
taxonIdCalais104	PlotCalais05_La20La40948Lo43Lo50174	Itacolomi State Park, Calais, MG, Brazil	BR	present	native	2008-10-21T09:26Z	http://dx.doi.org/10.5539/enrr.v2n3p574	taxonIdCalais104_PlotC05/decimalLatitude/-20.40948/decimalLongitude/-43.50174
taxonIdCalais105	PlotCalais05_La20La40948Lo43Lo50174	Itacolomi State Park, Calais, MG, Brazil	BR	present	native	2008-10-21T09:26Z	http://dx.doi.org/10.5539/enrr.v2n3p581	taxonIdCalais105_PlotC05/decimalLatitude/-20.40948/decimalLongitude/-43.50174
taxonIdCalais007	PlotCalais06_La20La41018Lo43Lo50195	Itacolomi State Park, Calais, MG, Brazil	BR	present	native	2008-10-21T09:26Z	http://dx.doi.org/10.5539/enrr.v2n3p132	taxonIdCalais007_PlotC06/decimalLatitude/-20.41018/decimalLongitude/-43.50195
taxonIdCalais008	PlotCalais06_La20La41018Lo43Lo50195	Itacolomi State Park, Calais, MG, Brazil	BR	present	native	2008-10-21T09:26Z	http://dx.doi.org/10.5539/enrr.v2n3p141	taxonIdCalais008_PlotC06/decimalLatitude/-20.41018/decimalLongitude/-43.50195
taxonIdCalais011	PlotCalais06_La20La41018Lo43Lo50195	Itacolomi State Park, Calais, MG, Brazil	BR	present	native	2008-10-21T09:26Z	http://dx.doi.org/10.5539/enrr.v2n3p161	taxonIdCalais011_PlotC06/decimalLatitude/-20.41018/decimalLongitude/-43.50195
taxonIdCalais014	PlotCalais06_La20La41018Lo43Lo50195	Itacolomi State Park, Calais, MG, Brazil	BR	present	native	2008-10-21T09:26Z	http://dx.doi.org/10.5539/enrr.v2n3p175	taxonIdCalais014_PlotC06/decimalLatitude/-20.41018/decimalLongitude/-43.50195
taxonIdCalais022	PlotCalais06_La20La41018Lo43Lo50195	Itacolomi State Park, Calais, MG, Brazil	BR	present	native	2008-10-21T09:26Z	http://dx.doi.org/10.5539/enrr.v2n3p220	taxonIdCalais022_PlotC06/decimalLatitude/-20.41018/decimalLongitude/-43.50195
taxonIdCalais024	PlotCalais06_La20La41018Lo43Lo50195	Itacolomi State Park, Calais, MG, Brazil	BR	present	native	2008-10-21T09:26Z	http://dx.doi.org/10.5539/enrr.v2n3p230	taxonIdCalais024_PlotC06/decimalLatitude/-20.41018/decimalLongitude/-43.50195
taxonIdCalais028	PlotCalais06_La20La41018Lo43Lo50195	Itacolomi State Park, Calais, MG, Brazil	BR	present	native	2008-10-21T09:26Z	http://dx.doi.org/10.5539/enrr.v2n3p248	taxonIdCalais028_PlotC06/decimalLatitude/-20.41018/decimalLongitude/-43.50195
taxonIdCalais034	PlotCalais06_La20La41018Lo43Lo50195	Itacolomi State Park, Calais, MG, Brazil	BR	present	native	2008-10-21T09:26Z	http://dx.doi.org/10.5539/enrr.v2n3p261	taxonIdCalais034_PlotC06/decimalLatitude/-20.41018/decimalLongitude/-43.50195
taxonIdCalais036	PlotCalais06_La20La41018Lo43Lo50195	Itacolomi State Park, Calais, MG, Brazil	BR	present	native	2008-10-21T09:26Z	http://dx.doi.org/10.5539/enrr.v2n3p267	taxonIdCalais036_PlotC06/decimalLatitude/-20.41018/decimalLongitude/-43.50195
taxonIdCalais040	PlotCalais06_La20La41018Lo43Lo50195	Itacolomi State Park, Calais, MG, Brazil	BR	present	native	2008-10-21T09:26Z	http://dx.doi.org/10.5539/enrr.v2n3p280	taxonIdCalais040_PlotC06/decimalLatitude/-20.41018/decimalLongitude/-43.50195
taxonIdCalais041	PlotCalais06_La20La41018Lo43Lo50195	Itacolomi State Park, Calais, MG, Brazil	BR	present	native	2008-10-21T09:26Z	http://dx.doi.org/10.5539/enrr.v2n3p282	taxonIdCalais041_PlotC06/decimalLatitude/-20.41018/decimalLongitude/-43.50195
taxonIdCalais044	PlotCalais06_La20La41018Lo43Lo50195	Itacolomi State Park, Calais, MG, Brazil	BR	present	native	2008-10-21T09:26Z	http://dx.doi.org/10.5539/enrr.v2n3p296	taxonIdCalais044_PlotC06/decimalLatitude/-20.41018/decimalLongitude/-43.50195
taxonIdCalais049	PlotCalais06_La20La41018Lo43Lo50195	Itacolomi State Park, Calais, MG, Brazil	BR	present	native	2008-10-21T09:26Z	http://dx.doi.org/10.5539/enrr.v2n3p309	taxonIdCalais049_PlotC06/decimalLatitude/-20.41018/decimalLongitude/-43.50195
taxonIdCalais052	PlotCalais06_La20La41018Lo43Lo50195	Itacolomi State Park, Calais, MG, Brazil	BR	present	native	2008-10-21T09:26Z	http://dx.doi.org/10.5539/enrr.v2n3p328	taxonIdCalais052_PlotC06/decimalLatitude/-20.41018/decimalLongitude/-43.50195
taxonIdCalais062	PlotCalais06_La20La41018Lo43Lo50195	Itacolomi State Park, Calais, MG, Brazil	BR	present	native	2008-10-21T09:26Z	http://dx.doi.org/10.5539/enrr.v2n3p356	taxonIdCalais062_PlotC06/decimalLatitude/-20.41018/decimalLongitude/-43.50195
taxonIdCalais066	PlotCalais06_La20La41018Lo43Lo50195	Itacolomi State Park, Calais, MG, Brazil	BR	present	native	2008-10-21T09:26Z	http://dx.doi.org/10.5539/enrr.v2n3p378	taxonIdCalais066_PlotC06/decimalLatitude/-20.41018/decimalLongitude/-43.50195
taxonIdCalais068	PlotCalais06_La20La41018Lo43Lo50195	Itacolomi State Park, Calais, MG, Brazil	BR	present	native	2008-10-21T09:26Z	http://dx.doi.org/10.5539/enrr.v2n3p394	taxonIdCalais068_PlotC06/decimalLatitude/-20.41018/decimalLongitude/-43.50195
taxonIdCalais069	PlotCalais06_La20La41018Lo43Lo50195	Itacolomi State Park, Calais, MG, Brazil	BR	present	native	2008-10-21T09:26Z	http://dx.doi.org/10.5539/enrr.v2n3p404	taxonIdCalais069_PlotC06/decimalLatitude/-20.41018/decimalLongitude/-43.50195
taxonIdCalais074	PlotCalais06_La20La41018Lo43Lo50195	Itacolomi State Park, Calais, MG, Brazil	BR	present	native	2008-10-21T09:26Z	http://dx.doi.org/10.5539/enrr.v2n3p421	taxonIdCalais074_PlotC06/decimalLatitude/-20.41018/decimalLongitude/-43.50195
taxonIdCalais076	PlotCalais06_La20La41018Lo43Lo50195	Itacolomi State Park, Calais, MG, Brazil	BR	present	native	2008-10-21T09:26Z	http://dx.doi.org/10.5539/enrr.v2n3p435	taxonIdCalais076_PlotC06/decimalLatitude/-20.41018/decimalLongitude/-43.50195
taxonIdCalais078	PlotCalais06_La20La41018Lo43Lo50195	Itacolomi State Park, Calais, MG, Brazil	BR	present	native	2008-10-21T09:26Z	http://dx.doi.org/10.5539/enrr.v2n3p449	taxonIdCalais078_PlotC06/decimalLatitude/-20.41018/decimalLongitude/-43.50195
taxonIdCalais079	PlotCalais06_La20La41018Lo43Lo50195	Itacolomi State Park, Calais, MG, Brazil	BR	present	native	2008-10-21T09:26Z	http://dx.doi.org/10.5539/enrr.v2n3p459	taxonIdCalais079_PlotC06/decimalLatitude/-20.41018/decimalLongitude/-43.50195
taxonIdCalais081	PlotCalais06_La20La41018Lo43Lo50195	Itacolomi State Park, Calais, MG, Brazil	BR	present	invasive	2008-10-21T09:26Z	http://dx.doi.org/10.5539/enrr.v2n3p467	taxonIdCalais081_PlotC06/decimalLatitude/-20.41018/decimalLongitude/-43.50195
taxonIdCalais082	PlotCalais06_La20La41018Lo43Lo50195	Itacolomi State Park, Calais, MG, Brazil	BR	present	native	2008-10-21T09:26Z	http://dx.doi.org/10.5539/enrr.v2n3p477	taxonIdCalais082_PlotC06/decimalLatitude/-20.41018/decimalLongitude/-43.50195
taxonIdCalais089	PlotCalais06_La20La41018Lo43Lo50195	Itacolomi State Park, Calais, MG, Brazil	BR	present	native	2008-10-21T09:26Z	http://dx.doi.org/10.5539/enrr.v2n3p510	taxonIdCalais089_PlotC06/decimalLatitude/-20.41018/decimalLongitude/-43.50195
taxonIdCalais091	PlotCalais06_La20La41018Lo43Lo50195	Itacolomi State Park, Calais, MG, Brazil	BR	present	native	2008-10-21T09:26Z	http://dx.doi.org/10.5539/enrr.v2n3p514	taxonIdCalais091_PlotC06/decimalLatitude/-20.41018/decimalLongitude/-43.50195
taxonIdCalais097	PlotCalais06_La20La41018Lo43Lo50195	Itacolomi State Park, Calais, MG, Brazil	BR	present	native	2008-10-21T09:26Z	http://dx.doi.org/10.5539/enrr.v2n3p539	taxonIdCalais097_PlotC06/decimalLatitude/-20.41018/decimalLongitude/-43.50195
taxonIdCalais100	PlotCalais06_La20La41018Lo43Lo50195	Itacolomi State Park, Calais, MG, Brazil	BR	present	native	2008-10-21T09:26Z	http://dx.doi.org/10.5539/enrr.v2n3p552	taxonIdCalais100_PlotC06/decimalLatitude/-20.41018/decimalLongitude/-43.50195
taxonIdCalais007	PlotCalais07_La20La41005Lo43Lo50185	Itacolomi State Park, Calais, MG, Brazil	BR	present	native	2008-10-21T09:26Z	http://dx.doi.org/10.5539/enrr.v2n3p133	taxonIdCalais007_PlotC07/decimalLatitude/-20.41005/decimalLongitude/-43.50185
taxonIdCalais008	PlotCalais07_La20La41005Lo43Lo50185	Itacolomi State Park, Calais, MG, Brazil	BR	present	native	2008-10-21T09:26Z	http://dx.doi.org/10.5539/enrr.v2n3p142	taxonIdCalais008_PlotC07/decimalLatitude/-20.41005/decimalLongitude/-43.50185
taxonIdCalais010	PlotCalais07_La20La41005Lo43Lo50185	Itacolomi State Park, Calais, MG, Brazil	BR	present	native	2008-10-21T09:26Z	http://dx.doi.org/10.5539/enrr.v2n3p149	taxonIdCalais010_PlotC07/decimalLatitude/-20.41005/decimalLongitude/-43.50185
taxonIdCalais011	PlotCalais07_La20La41005Lo43Lo50185	Itacolomi State Park, Calais, MG, Brazil	BR	present	native	2008-10-21T09:26Z	http://dx.doi.org/10.5539/enrr.v2n3p162	taxonIdCalais011_PlotC07/decimalLatitude/-20.41005/decimalLongitude/-43.50185
taxonIdCalais013	PlotCalais07_La20La41005Lo43Lo50185	Itacolomi State Park, Calais, MG, Brazil	BR	present	native	2008-10-21T09:26Z	http://dx.doi.org/10.5539/enrr.v2n3p171	taxonIdCalais013_PlotC07/decimalLatitude/-20.41005/decimalLongitude/-43.50185
taxonIdCalais014	PlotCalais07_La20La41005Lo43Lo50185	Itacolomi State Park, Calais, MG, Brazil	BR	present	native	2008-10-21T09:26Z	http://dx.doi.org/10.5539/enrr.v2n3p176	taxonIdCalais014_PlotC07/decimalLatitude/-20.41005/decimalLongitude/-43.50185
taxonIdCalais016	PlotCalais07_La20La41005Lo43Lo50185	Itacolomi State Park, Calais, MG, Brazil	BR	present	native	2008-10-21T09:26Z	http://dx.doi.org/10.5539/enrr.v2n3p192	taxonIdCalais016_PlotC07/decimalLatitude/-20.41005/decimalLongitude/-43.50185
taxonIdCalais020	PlotCalais07_La20La41005Lo43Lo50185	Itacolomi State Park, Calais, MG, Brazil	BR	present	native	2008-10-21T09:26Z	http://dx.doi.org/10.5539/enrr.v2n3p208	taxonIdCalais020_PlotC07/decimalLatitude/-20.41005/decimalLongitude/-43.50185
taxonIdCalais022	PlotCalais07_La20La41005Lo43Lo50185	Itacolomi State Park, Calais, MG, Brazil	BR	present	native	2008-10-21T09:26Z	http://dx.doi.org/10.5539/enrr.v2n3p221	taxonIdCalais022_PlotC07/decimalLatitude/-20.41005/decimalLongitude/-43.50185
taxonIdCalais026	PlotCalais07_La20La41005Lo43Lo50185	Itacolomi State Park, Calais, MG, Brazil	BR	present	native	2008-10-21T09:26Z	http://dx.doi.org/10.5539/enrr.v2n3p238	taxonIdCalais026_PlotC07/decimalLatitude/-20.41005/decimalLongitude/-43.50185
taxonIdCalais034	PlotCalais07_La20La41005Lo43Lo50185	Itacolomi State Park, Calais, MG, Brazil	BR	present	native	2008-10-21T09:26Z	http://dx.doi.org/10.5539/enrr.v2n3p262	taxonIdCalais034_PlotC07/decimalLatitude/-20.41005/decimalLongitude/-43.50185
taxonIdCalais036	PlotCalais07_La20La41005Lo43Lo50185	Itacolomi State Park, Calais, MG, Brazil	BR	present	native	2008-10-21T09:26Z	http://dx.doi.org/10.5539/enrr.v2n3p268	taxonIdCalais036_PlotC07/decimalLatitude/-20.41005/decimalLongitude/-43.50185
taxonIdCalais038	PlotCalais07_La20La41005Lo43Lo50185	Itacolomi State Park, Calais, MG, Brazil	BR	present	native	2008-10-21T09:26Z	http://dx.doi.org/10.5539/enrr.v2n3p274	taxonIdCalais038_PlotC07/decimalLatitude/-20.41005/decimalLongitude/-43.50185
taxonIdCalais040	PlotCalais07_La20La41005Lo43Lo50185	Itacolomi State Park, Calais, MG, Brazil	BR	present	native	2008-10-21T09:26Z	http://dx.doi.org/10.5539/enrr.v2n3p281	taxonIdCalais040_PlotC07/decimalLatitude/-20.41005/decimalLongitude/-43.50185
taxonIdCalais041	PlotCalais07_La20La41005Lo43Lo50185	Itacolomi State Park, Calais, MG, Brazil	BR	present	native	2008-10-21T09:26Z	http://dx.doi.org/10.5539/enrr.v2n3p283	taxonIdCalais041_PlotC07/decimalLatitude/-20.41005/decimalLongitude/-43.50185
taxonIdCalais049	PlotCalais07_La20La41005Lo43Lo50185	Itacolomi State Park, Calais, MG, Brazil	BR	present	native	2008-10-21T09:26Z	http://dx.doi.org/10.5539/enrr.v2n3p310	taxonIdCalais049_PlotC07/decimalLatitude/-20.41005/decimalLongitude/-43.50185
taxonIdCalais056	PlotCalais07_La20La41005Lo43Lo50185	Itacolomi State Park, Calais, MG, Brazil	BR	present	native	2008-10-21T09:26Z	http://dx.doi.org/10.5539/enrr.v2n3p337	taxonIdCalais056_PlotC07/decimalLatitude/-20.41005/decimalLongitude/-43.50185
taxonIdCalais062	PlotCalais07_La20La41005Lo43Lo50185	Itacolomi State Park, Calais, MG, Brazil	BR	present	native	2008-10-21T09:26Z	http://dx.doi.org/10.5539/enrr.v2n3p357	taxonIdCalais062_PlotC07/decimalLatitude/-20.41005/decimalLongitude/-43.50185
taxonIdCalais066	PlotCalais07_La20La41005Lo43Lo50185	Itacolomi State Park, Calais, MG, Brazil	BR	present	native	2008-10-21T09:26Z	http://dx.doi.org/10.5539/enrr.v2n3p379	taxonIdCalais066_PlotC07/decimalLatitude/-20.41005/decimalLongitude/-43.50185
taxonIdCalais067	PlotCalais07_La20La41005Lo43Lo50185	Itacolomi State Park, Calais, MG, Brazil	BR	present	native	2008-10-21T09:26Z	http://dx.doi.org/10.5539/enrr.v2n3p389	taxonIdCalais067_PlotC07/decimalLatitude/-20.41005/decimalLongitude/-43.50185
taxonIdCalais068	PlotCalais07_La20La41005Lo43Lo50185	Itacolomi State Park, Calais, MG, Brazil	BR	present	native	2008-10-21T09:26Z	http://dx.doi.org/10.5539/enrr.v2n3p395	taxonIdCalais068_PlotC07/decimalLatitude/-20.41005/decimalLongitude/-43.50185
taxonIdCalais069	PlotCalais07_La20La41005Lo43Lo50185	Itacolomi State Park, Calais, MG, Brazil	BR	present	native	2008-10-21T09:26Z	http://dx.doi.org/10.5539/enrr.v2n3p405	taxonIdCalais069_PlotC07/decimalLatitude/-20.41005/decimalLongitude/-43.50185
taxonIdCalais070	PlotCalais07_La20La41005Lo43Lo50185	Itacolomi State Park, Calais, MG, Brazil	BR	present	native	2008-10-21T09:26Z	http://dx.doi.org/10.5539/enrr.v2n3p409	taxonIdCalais070_PlotC07/decimalLatitude/-20.41005/decimalLongitude/-43.50185
taxonIdCalais074	PlotCalais07_La20La41005Lo43Lo50185	Itacolomi State Park, Calais, MG, Brazil	BR	present	native	2008-10-21T09:26Z	http://dx.doi.org/10.5539/enrr.v2n3p422	taxonIdCalais074_PlotC07/decimalLatitude/-20.41005/decimalLongitude/-43.50185
taxonIdCalais076	PlotCalais07_La20La41005Lo43Lo50185	Itacolomi State Park, Calais, MG, Brazil	BR	present	native	2008-10-21T09:26Z	http://dx.doi.org/10.5539/enrr.v2n3p436	taxonIdCalais076_PlotC07/decimalLatitude/-20.41005/decimalLongitude/-43.50185
taxonIdCalais078	PlotCalais07_La20La41005Lo43Lo50185	Itacolomi State Park, Calais, MG, Brazil	BR	present	native	2008-10-21T09:26Z	http://dx.doi.org/10.5539/enrr.v2n3p450	taxonIdCalais078_PlotC07/decimalLatitude/-20.41005/decimalLongitude/-43.50185
taxonIdCalais081	PlotCalais07_La20La41005Lo43Lo50185	Itacolomi State Park, Calais, MG, Brazil	BR	present	invasive	2008-10-21T09:26Z	http://dx.doi.org/10.5539/enrr.v2n3p468	taxonIdCalais081_PlotC07/decimalLatitude/-20.41005/decimalLongitude/-43.50185
taxonIdCalais082	PlotCalais07_La20La41005Lo43Lo50185	Itacolomi State Park, Calais, MG, Brazil	BR	present	native	2008-10-21T09:26Z	http://dx.doi.org/10.5539/enrr.v2n3p478	taxonIdCalais082_PlotC07/decimalLatitude/-20.41005/decimalLongitude/-43.50185
taxonIdCalais083	PlotCalais07_La20La41005Lo43Lo50185	Itacolomi State Park, Calais, MG, Brazil	BR	present	native	2008-10-21T09:26Z	http://dx.doi.org/10.5539/enrr.v2n3p486	taxonIdCalais083_PlotC07/decimalLatitude/-20.41005/decimalLongitude/-43.50185
taxonIdCalais086	PlotCalais07_La20La41005Lo43Lo50185	Itacolomi State Park, Calais, MG, Brazil	BR	present	native	2008-10-21T09:26Z	http://dx.doi.org/10.5539/enrr.v2n3p498	taxonIdCalais086_PlotC07/decimalLatitude/-20.41005/decimalLongitude/-43.50185
taxonIdCalais093	PlotCalais07_La20La41005Lo43Lo50185	Itacolomi State Park, Calais, MG, Brazil	BR	present	native	2008-10-21T09:26Z	http://dx.doi.org/10.5539/enrr.v2n3p524	taxonIdCalais093_PlotC07/decimalLatitude/-20.41005/decimalLongitude/-43.50185
taxonIdCalais100	PlotCalais07_La20La41005Lo43Lo50185	Itacolomi State Park, Calais, MG, Brazil	BR	present	native	2008-10-21T09:26Z	http://dx.doi.org/10.5539/enrr.v2n3p553	taxonIdCalais100_PlotC07/decimalLatitude/-20.41005/decimalLongitude/-43.50185
taxonIdCalais010	PlotCalais08_La20La40990Lo43Lo50172	Itacolomi State Park, Calais, MG, Brazil	BR	present	native	2008-10-21T09:26Z	http://dx.doi.org/10.5539/enrr.v2n3p150	taxonIdCalais010_PlotC08/decimalLatitude/-20.40990/decimalLongitude/-43.50172
taxonIdCalais011	PlotCalais08_La20La40990Lo43Lo50172	Itacolomi State Park, Calais, MG, Brazil	BR	present	native	2008-10-21T09:26Z	http://dx.doi.org/10.5539/enrr.v2n3p163	taxonIdCalais011_PlotC08/decimalLatitude/-20.40990/decimalLongitude/-43.50172
taxonIdCalais020	PlotCalais08_La20La40990Lo43Lo50172	Itacolomi State Park, Calais, MG, Brazil	BR	present	native	2008-10-21T09:26Z	http://dx.doi.org/10.5539/enrr.v2n3p209	taxonIdCalais020_PlotC08/decimalLatitude/-20.40990/decimalLongitude/-43.50172
taxonIdCalais022	PlotCalais08_La20La40990Lo43Lo50172	Itacolomi State Park, Calais, MG, Brazil	BR	present	native	2008-10-21T09:26Z	http://dx.doi.org/10.5539/enrr.v2n3p222	taxonIdCalais022_PlotC08/decimalLatitude/-20.40990/decimalLongitude/-43.50172
taxonIdCalais026	PlotCalais08_La20La40990Lo43Lo50172	Itacolomi State Park, Calais, MG, Brazil	BR	present	native	2008-10-21T09:26Z	http://dx.doi.org/10.5539/enrr.v2n3p239	taxonIdCalais026_PlotC08/decimalLatitude/-20.40990/decimalLongitude/-43.50172
taxonIdCalais033	PlotCalais08_La20La40990Lo43Lo50172	Itacolomi State Park, Calais, MG, Brazil	BR	present	native	2008-10-21T09:26Z	http://dx.doi.org/10.5539/enrr.v2n3p257	taxonIdCalais033_PlotC08/decimalLatitude/-20.40990/decimalLongitude/-43.50172
taxonIdCalais044	PlotCalais08_La20La40990Lo43Lo50172	Itacolomi State Park, Calais, MG, Brazil	BR	present	native	2008-10-21T09:26Z	http://dx.doi.org/10.5539/enrr.v2n3p297	taxonIdCalais044_PlotC08/decimalLatitude/-20.40990/decimalLongitude/-43.50172
taxonIdCalais049	PlotCalais08_La20La40990Lo43Lo50172	Itacolomi State Park, Calais, MG, Brazil	BR	present	native	2008-10-21T09:26Z	http://dx.doi.org/10.5539/enrr.v2n3p311	taxonIdCalais049_PlotC08/decimalLatitude/-20.40990/decimalLongitude/-43.50172
taxonIdCalais056	PlotCalais08_La20La40990Lo43Lo50172	Itacolomi State Park, Calais, MG, Brazil	BR	present	native	2008-10-21T09:26Z	http://dx.doi.org/10.5539/enrr.v2n3p338	taxonIdCalais056_PlotC08/decimalLatitude/-20.40990/decimalLongitude/-43.50172
taxonIdCalais059	PlotCalais08_La20La40990Lo43Lo50172	Itacolomi State Park, Calais, MG, Brazil	BR	present	native	2008-10-21T09:26Z	http://dx.doi.org/10.5539/enrr.v2n3p347	taxonIdCalais059_PlotC08/decimalLatitude/-20.40990/decimalLongitude/-43.50172
taxonIdCalais060	PlotCalais08_La20La40990Lo43Lo50172	Itacolomi State Park, Calais, MG, Brazil	BR	present	native	2008-10-21T09:26Z	http://dx.doi.org/10.5539/enrr.v2n3p350	taxonIdCalais060_PlotC08/decimalLatitude/-20.40990/decimalLongitude/-43.50172
taxonIdCalais065	PlotCalais08_La20La40990Lo43Lo50172	Itacolomi State Park, Calais, MG, Brazil	BR	present	native	2008-10-21T09:26Z	http://dx.doi.org/10.5539/enrr.v2n3p376	taxonIdCalais065_PlotC08/decimalLatitude/-20.40990/decimalLongitude/-43.50172
taxonIdCalais066	PlotCalais08_La20La40990Lo43Lo50172	Itacolomi State Park, Calais, MG, Brazil	BR	present	native	2008-10-21T09:26Z	http://dx.doi.org/10.5539/enrr.v2n3p380	taxonIdCalais066_PlotC08/decimalLatitude/-20.40990/decimalLongitude/-43.50172
taxonIdCalais068	PlotCalais08_La20La40990Lo43Lo50172	Itacolomi State Park, Calais, MG, Brazil	BR	present	native	2008-10-21T09:26Z	http://dx.doi.org/10.5539/enrr.v2n3p396	taxonIdCalais068_PlotC08/decimalLatitude/-20.40990/decimalLongitude/-43.50172
taxonIdCalais069	PlotCalais08_La20La40990Lo43Lo50172	Itacolomi State Park, Calais, MG, Brazil	BR	present	native	2008-10-21T09:26Z	http://dx.doi.org/10.5539/enrr.v2n3p406	taxonIdCalais069_PlotC08/decimalLatitude/-20.40990/decimalLongitude/-43.50172
taxonIdCalais070	PlotCalais08_La20La40990Lo43Lo50172	Itacolomi State Park, Calais, MG, Brazil	BR	present	native	2008-10-21T09:26Z	http://dx.doi.org/10.5539/enrr.v2n3p410	taxonIdCalais070_PlotC08/decimalLatitude/-20.40990/decimalLongitude/-43.50172
taxonIdCalais074	PlotCalais08_La20La40990Lo43Lo50172	Itacolomi State Park, Calais, MG, Brazil	BR	present	native	2008-10-21T09:26Z	http://dx.doi.org/10.5539/enrr.v2n3p423	taxonIdCalais074_PlotC08/decimalLatitude/-20.40990/decimalLongitude/-43.50172
taxonIdCalais076	PlotCalais08_La20La40990Lo43Lo50172	Itacolomi State Park, Calais, MG, Brazil	BR	present	native	2008-10-21T09:26Z	http://dx.doi.org/10.5539/enrr.v2n3p437	taxonIdCalais076_PlotC08/decimalLatitude/-20.40990/decimalLongitude/-43.50172
taxonIdCalais078	PlotCalais08_La20La40990Lo43Lo50172	Itacolomi State Park, Calais, MG, Brazil	BR	present	native	2008-10-21T09:26Z	http://dx.doi.org/10.5539/enrr.v2n3p451	taxonIdCalais078_PlotC08/decimalLatitude/-20.40990/decimalLongitude/-43.50172
taxonIdCalais081	PlotCalais08_La20La40990Lo43Lo50172	Itacolomi State Park, Calais, MG, Brazil	BR	present	invasive	2008-10-21T09:26Z	http://dx.doi.org/10.5539/enrr.v2n3p469	taxonIdCalais081_PlotC08/decimalLatitude/-20.40990/decimalLongitude/-43.50172
taxonIdCalais083	PlotCalais08_La20La40990Lo43Lo50172	Itacolomi State Park, Calais, MG, Brazil	BR	present	native	2008-10-21T09:26Z	http://dx.doi.org/10.5539/enrr.v2n3p487	taxonIdCalais083_PlotC08/decimalLatitude/-20.40990/decimalLongitude/-43.50172
taxonIdCalais086	PlotCalais08_La20La40990Lo43Lo50172	Itacolomi State Park, Calais, MG, Brazil	BR	present	native	2008-10-21T09:26Z	http://dx.doi.org/10.5539/enrr.v2n3p499	taxonIdCalais086_PlotC08/decimalLatitude/-20.40990/decimalLongitude/-43.50172
taxonIdCalais092	PlotCalais08_La20La40990Lo43Lo50172	Itacolomi State Park, Calais, MG, Brazil	BR	present	native	2008-10-21T09:26Z	http://dx.doi.org/10.5539/enrr.v2n3p520	taxonIdCalais092_PlotC08/decimalLatitude/-20.40990/decimalLongitude/-43.50172
taxonIdCalais093	PlotCalais08_La20La40990Lo43Lo50172	Itacolomi State Park, Calais, MG, Brazil	BR	present	native	2008-10-21T09:26Z	http://dx.doi.org/10.5539/enrr.v2n3p525	taxonIdCalais093_PlotC08/decimalLatitude/-20.40990/decimalLongitude/-43.50172
taxonIdCalais100	PlotCalais08_La20La40990Lo43Lo50172	Itacolomi State Park, Calais, MG, Brazil	BR	present	native	2008-10-21T09:26Z	http://dx.doi.org/10.5539/enrr.v2n3p554	taxonIdCalais100_PlotC08/decimalLatitude/-20.40990/decimalLongitude/-43.50172
taxonIdCalais101	PlotCalais08_La20La40990Lo43Lo50172	Itacolomi State Park, Calais, MG, Brazil	BR	present	native	2008-10-21T09:26Z	http://dx.doi.org/10.5539/enrr.v2n3p563	taxonIdCalais101_PlotC08/decimalLatitude/-20.40990/decimalLongitude/-43.50172
taxonIdCalais107	PlotCalais08_La20La40990Lo43Lo50172	Itacolomi State Park, Calais, MG, Brazil	BR	present	native	2008-10-21T09:26Z	http://dx.doi.org/10.5539/enrr.v2n3p592	taxonIdCalais107_PlotC08/decimalLatitude/-20.40990/decimalLongitude/-43.50172
taxonIdCalais002	PlotCalais09_La20La40971Lo43Lo50165	Itacolomi State Park, Calais, MG, Brazil	BR	present	native	2008-10-21T09:26Z	http://dx.doi.org/10.5539/enrr.v2n3p117	taxonIdCalais002_PlotC09/decimalLatitude/-20.40971/decimalLongitude/-43.50165
taxonIdCalais005	PlotCalais09_La20La40971Lo43Lo50165	Itacolomi State Park, Calais, MG, Brazil	BR	present	native	2008-10-21T09:26Z	http://dx.doi.org/10.5539/enrr.v2n3p124	taxonIdCalais005_PlotC09/decimalLatitude/-20.40971/decimalLongitude/-43.50165
taxonIdCalais006	PlotCalais09_La20La40971Lo43Lo50165	Itacolomi State Park, Calais, MG, Brazil	BR	present	native	2008-10-21T09:26Z	http://dx.doi.org/10.5539/enrr.v2n3p126	taxonIdCalais006_PlotC09/decimalLatitude/-20.40971/decimalLongitude/-43.50165
taxonIdCalais008	PlotCalais09_La20La40971Lo43Lo50165	Itacolomi State Park, Calais, MG, Brazil	BR	present	native	2008-10-21T09:26Z	http://dx.doi.org/10.5539/enrr.v2n3p143	taxonIdCalais008_PlotC09/decimalLatitude/-20.40971/decimalLongitude/-43.50165
taxonIdCalais010	PlotCalais09_La20La40971Lo43Lo50165	Itacolomi State Park, Calais, MG, Brazil	BR	present	native	2008-10-21T09:26Z	http://dx.doi.org/10.5539/enrr.v2n3p151	taxonIdCalais010_PlotC09/decimalLatitude/-20.40971/decimalLongitude/-43.50165
taxonIdCalais011	PlotCalais09_La20La40971Lo43Lo50165	Itacolomi State Park, Calais, MG, Brazil	BR	present	native	2008-10-21T09:26Z	http://dx.doi.org/10.5539/enrr.v2n3p164	taxonIdCalais011_PlotC09/decimalLatitude/-20.40971/decimalLongitude/-43.50165
taxonIdCalais016	PlotCalais09_La20La40971Lo43Lo50165	Itacolomi State Park, Calais, MG, Brazil	BR	present	native	2008-10-21T09:26Z	http://dx.doi.org/10.5539/enrr.v2n3p193	taxonIdCalais016_PlotC09/decimalLatitude/-20.40971/decimalLongitude/-43.50165
taxonIdCalais019	PlotCalais09_La20La40971Lo43Lo50165	Itacolomi State Park, Calais, MG, Brazil	BR	present	native	2008-10-21T09:26Z	http://dx.doi.org/10.5539/enrr.v2n3p204	taxonIdCalais019_PlotC09/decimalLatitude/-20.40971/decimalLongitude/-43.50165
taxonIdCalais020	PlotCalais09_La20La40971Lo43Lo50165	Itacolomi State Park, Calais, MG, Brazil	BR	present	native	2008-10-21T09:26Z	http://dx.doi.org/10.5539/enrr.v2n3p210	taxonIdCalais020_PlotC09/decimalLatitude/-20.40971/decimalLongitude/-43.50165
taxonIdCalais022	PlotCalais09_La20La40971Lo43Lo50165	Itacolomi State Park, Calais, MG, Brazil	BR	present	native	2008-10-21T09:26Z	http://dx.doi.org/10.5539/enrr.v2n3p223	taxonIdCalais022_PlotC09/decimalLatitude/-20.40971/decimalLongitude/-43.50165
taxonIdCalais023	PlotCalais09_La20La40971Lo43Lo50165	Itacolomi State Park, Calais, MG, Brazil	BR	present	native	2008-10-21T09:26Z	http://dx.doi.org/10.5539/enrr.v2n3p229	taxonIdCalais023_PlotC09/decimalLatitude/-20.40971/decimalLongitude/-43.50165
taxonIdCalais034	PlotCalais09_La20La40971Lo43Lo50165	Itacolomi State Park, Calais, MG, Brazil	BR	present	native	2008-10-21T09:26Z	http://dx.doi.org/10.5539/enrr.v2n3p263	taxonIdCalais034_PlotC09/decimalLatitude/-20.40971/decimalLongitude/-43.50165
taxonIdCalais041	PlotCalais09_La20La40971Lo43Lo50165	Itacolomi State Park, Calais, MG, Brazil	BR	present	native	2008-10-21T09:26Z	http://dx.doi.org/10.5539/enrr.v2n3p284	taxonIdCalais041_PlotC09/decimalLatitude/-20.40971/decimalLongitude/-43.50165
taxonIdCalais049	PlotCalais09_La20La40971Lo43Lo50165	Itacolomi State Park, Calais, MG, Brazil	BR	present	native	2008-10-21T09:26Z	http://dx.doi.org/10.5539/enrr.v2n3p312	taxonIdCalais049_PlotC09/decimalLatitude/-20.40971/decimalLongitude/-43.50165
taxonIdCalais051	PlotCalais09_La20La40971Lo43Lo50165	Itacolomi State Park, Calais, MG, Brazil	BR	present	native	2008-10-21T09:26Z	http://dx.doi.org/10.5539/enrr.v2n3p320	taxonIdCalais051_PlotC09/decimalLatitude/-20.40971/decimalLongitude/-43.50165
taxonIdCalais054	PlotCalais09_La20La40971Lo43Lo50165	Itacolomi State Park, Calais, MG, Brazil	BR	present	native	2008-10-21T09:26Z	http://dx.doi.org/10.5539/enrr.v2n3p332	taxonIdCalais054_PlotC09/decimalLatitude/-20.40971/decimalLongitude/-43.50165
taxonIdCalais056	PlotCalais09_La20La40971Lo43Lo50165	Itacolomi State Park, Calais, MG, Brazil	BR	present	native	2008-10-21T09:26Z	http://dx.doi.org/10.5539/enrr.v2n3p339	taxonIdCalais056_PlotC09/decimalLatitude/-20.40971/decimalLongitude/-43.50165
taxonIdCalais059	PlotCalais09_La20La40971Lo43Lo50165	Itacolomi State Park, Calais, MG, Brazil	BR	present	native	2008-10-21T09:26Z	http://dx.doi.org/10.5539/enrr.v2n3p348	taxonIdCalais059_PlotC09/decimalLatitude/-20.40971/decimalLongitude/-43.50165
taxonIdCalais062	PlotCalais09_La20La40971Lo43Lo50165	Itacolomi State Park, Calais, MG, Brazil	BR	present	native	2008-10-21T09:26Z	http://dx.doi.org/10.5539/enrr.v2n3p358	taxonIdCalais062_PlotC09/decimalLatitude/-20.40971/decimalLongitude/-43.50165
taxonIdCalais064	PlotCalais09_La20La40971Lo43Lo50165	Itacolomi State Park, Calais, MG, Brazil	BR	present	native	2008-10-21T09:26Z	http://dx.doi.org/10.5539/enrr.v2n3p370	taxonIdCalais064_PlotC09/decimalLatitude/-20.40971/decimalLongitude/-43.50165
taxonIdCalais066	PlotCalais09_La20La40971Lo43Lo50165	Itacolomi State Park, Calais, MG, Brazil	BR	present	native	2008-10-21T09:26Z	http://dx.doi.org/10.5539/enrr.v2n3p381	taxonIdCalais066_PlotC09/decimalLatitude/-20.40971/decimalLongitude/-43.50165
taxonIdCalais067	PlotCalais09_La20La40971Lo43Lo50165	Itacolomi State Park, Calais, MG, Brazil	BR	present	native	2008-10-21T09:26Z	http://dx.doi.org/10.5539/enrr.v2n3p390	taxonIdCalais067_PlotC09/decimalLatitude/-20.40971/decimalLongitude/-43.50165
taxonIdCalais074	PlotCalais09_La20La40971Lo43Lo50165	Itacolomi State Park, Calais, MG, Brazil	BR	present	native	2008-10-21T09:26Z	http://dx.doi.org/10.5539/enrr.v2n3p424	taxonIdCalais074_PlotC09/decimalLatitude/-20.40971/decimalLongitude/-43.50165
taxonIdCalais075	PlotCalais09_La20La40971Lo43Lo50165	Itacolomi State Park, Calais, MG, Brazil	BR	present	native	2008-10-21T09:26Z	http://dx.doi.org/10.5539/enrr.v2n3p430	taxonIdCalais075_PlotC09/decimalLatitude/-20.40971/decimalLongitude/-43.50165
taxonIdCalais078	PlotCalais09_La20La40971Lo43Lo50165	Itacolomi State Park, Calais, MG, Brazil	BR	present	native	2008-10-21T09:26Z	http://dx.doi.org/10.5539/enrr.v2n3p452	taxonIdCalais078_PlotC09/decimalLatitude/-20.40971/decimalLongitude/-43.50165
taxonIdCalais081	PlotCalais09_La20La40971Lo43Lo50165	Itacolomi State Park, Calais, MG, Brazil	BR	present	invasive	2008-10-21T09:26Z	http://dx.doi.org/10.5539/enrr.v2n3p470	taxonIdCalais081_PlotC09/decimalLatitude/-20.40971/decimalLongitude/-43.50165
taxonIdCalais083	PlotCalais09_La20La40971Lo43Lo50165	Itacolomi State Park, Calais, MG, Brazil	BR	present	native	2008-10-21T09:26Z	http://dx.doi.org/10.5539/enrr.v2n3p488	taxonIdCalais083_PlotC09/decimalLatitude/-20.40971/decimalLongitude/-43.50165
taxonIdCalais086	PlotCalais09_La20La40971Lo43Lo50165	Itacolomi State Park, Calais, MG, Brazil	BR	present	native	2008-10-21T09:26Z	http://dx.doi.org/10.5539/enrr.v2n3p500	taxonIdCalais086_PlotC09/decimalLatitude/-20.40971/decimalLongitude/-43.50165
taxonIdCalais088	PlotCalais09_La20La40971Lo43Lo50165	Itacolomi State Park, Calais, MG, Brazil	BR	present	invasive	2008-10-21T09:26Z	http://dx.doi.org/10.5539/enrr.v2n3p507	taxonIdCalais088_PlotC09/decimalLatitude/-20.40971/decimalLongitude/-43.50165
taxonIdCalais089	PlotCalais09_La20La40971Lo43Lo50165	Itacolomi State Park, Calais, MG, Brazil	BR	present	native	2008-10-21T09:26Z	http://dx.doi.org/10.5539/enrr.v2n3p511	taxonIdCalais089_PlotC09/decimalLatitude/-20.40971/decimalLongitude/-43.50165
taxonIdCalais093	PlotCalais09_La20La40971Lo43Lo50165	Itacolomi State Park, Calais, MG, Brazil	BR	present	native	2008-10-21T09:26Z	http://dx.doi.org/10.5539/enrr.v2n3p526	taxonIdCalais093_PlotC09/decimalLatitude/-20.40971/decimalLongitude/-43.50165
taxonIdCalais094	PlotCalais09_La20La40971Lo43Lo50165	Itacolomi State Park, Calais, MG, Brazil	BR	present	native	2008-10-21T09:26Z	http://dx.doi.org/10.5539/enrr.v2n3p530	taxonIdCalais094_PlotC09/decimalLatitude/-20.40971/decimalLongitude/-43.50165
taxonIdCalais097	PlotCalais09_La20La40971Lo43Lo50165	Itacolomi State Park, Calais, MG, Brazil	BR	present	native	2008-10-21T09:26Z	http://dx.doi.org/10.5539/enrr.v2n3p540	taxonIdCalais097_PlotC09/decimalLatitude/-20.40971/decimalLongitude/-43.50165
taxonIdCalais100	PlotCalais09_La20La40971Lo43Lo50165	Itacolomi State Park, Calais, MG, Brazil	BR	present	native	2008-10-21T09:26Z	http://dx.doi.org/10.5539/enrr.v2n3p555	taxonIdCalais100_PlotC09/decimalLatitude/-20.40971/decimalLongitude/-43.50165
taxonIdCalais101	PlotCalais09_La20La40971Lo43Lo50165	Itacolomi State Park, Calais, MG, Brazil	BR	present	native	2008-10-21T09:26Z	http://dx.doi.org/10.5539/enrr.v2n3p564	taxonIdCalais101_PlotC09/decimalLatitude/-20.40971/decimalLongitude/-43.50165
taxonIdCalais104	PlotCalais09_La20La40971Lo43Lo50165	Itacolomi State Park, Calais, MG, Brazil	BR	present	native	2008-10-21T09:26Z	http://dx.doi.org/10.5539/enrr.v2n3p575	taxonIdCalais104_PlotC09/decimalLatitude/-20.40971/decimalLongitude/-43.50165
taxonIdCalais106	PlotCalais09_La20La40971Lo43Lo50165	Itacolomi State Park, Calais, MG, Brazil	BR	present	native	2008-10-21T09:26Z	http://dx.doi.org/10.5539/enrr.v2n3p585	taxonIdCalais106_PlotC09/decimalLatitude/-20.40971/decimalLongitude/-43.50165
taxonIdCalais003	PlotCalais10_La20La40953Lo43Lo50156	Itacolomi State Park, Calais, MG, Brazil	BR	present	native	2008-10-21T09:26Z	http://dx.doi.org/10.5539/enrr.v2n3p118	taxonIdCalais003_PlotC10/decimalLatitude/-20.40953/decimalLongitude/-43.50156
taxonIdCalais006	PlotCalais10_La20La40953Lo43Lo50156	Itacolomi State Park, Calais, MG, Brazil	BR	present	native	2008-10-21T09:26Z	http://dx.doi.org/10.5539/enrr.v2n3p127	taxonIdCalais006_PlotC10/decimalLatitude/-20.40953/decimalLongitude/-43.50156
taxonIdCalais012	PlotCalais10_La20La40953Lo43Lo50156	Itacolomi State Park, Calais, MG, Brazil	BR	present	native	2008-10-21T09:26Z	http://dx.doi.org/10.5539/enrr.v2n3p169	taxonIdCalais012_PlotC10/decimalLatitude/-20.40953/decimalLongitude/-43.50156
taxonIdCalais017	PlotCalais10_La20La40953Lo43Lo50156	Itacolomi State Park, Calais, MG, Brazil	BR	present	native	2008-10-21T09:26Z	http://dx.doi.org/10.5539/enrr.v2n3p199	taxonIdCalais017_PlotC10/decimalLatitude/-20.40953/decimalLongitude/-43.50156
taxonIdCalais018	PlotCalais10_La20La40953Lo43Lo50156	Itacolomi State Park, Calais, MG, Brazil	BR	present	native	2008-10-21T09:26Z	http://dx.doi.org/10.5539/enrr.v2n3p202	taxonIdCalais018_PlotC10/decimalLatitude/-20.40953/decimalLongitude/-43.50156
taxonIdCalais026	PlotCalais10_La20La40953Lo43Lo50156	Itacolomi State Park, Calais, MG, Brazil	BR	present	native	2008-10-21T09:26Z	http://dx.doi.org/10.5539/enrr.v2n3p240	taxonIdCalais026_PlotC10/decimalLatitude/-20.40953/decimalLongitude/-43.50156
taxonIdCalais029	PlotCalais10_La20La40953Lo43Lo50156	Itacolomi State Park, Calais, MG, Brazil	BR	present	native	2008-10-21T09:26Z	http://dx.doi.org/10.5539/enrr.v2n3p250	taxonIdCalais029_PlotC10/decimalLatitude/-20.40953/decimalLongitude/-43.50156
taxonIdCalais032	PlotCalais10_La20La40953Lo43Lo50156	Itacolomi State Park, Calais, MG, Brazil	BR	present	native	2008-10-21T09:26Z	http://dx.doi.org/10.5539/enrr.v2n3p256	taxonIdCalais032_PlotC10/decimalLatitude/-20.40953/decimalLongitude/-43.50156
taxonIdCalais037	PlotCalais10_La20La40953Lo43Lo50156	Itacolomi State Park, Calais, MG, Brazil	BR	present	native	2008-10-21T09:26Z	http://dx.doi.org/10.5539/enrr.v2n3p272	taxonIdCalais037_PlotC10/decimalLatitude/-20.40953/decimalLongitude/-43.50156
taxonIdCalais041	PlotCalais10_La20La40953Lo43Lo50156	Itacolomi State Park, Calais, MG, Brazil	BR	present	native	2008-10-21T09:26Z	http://dx.doi.org/10.5539/enrr.v2n3p285	taxonIdCalais041_PlotC10/decimalLatitude/-20.40953/decimalLongitude/-43.50156
taxonIdCalais045	PlotCalais10_La20La40953Lo43Lo50156	Itacolomi State Park, Calais, MG, Brazil	BR	present	native	2008-10-21T09:26Z	http://dx.doi.org/10.5539/enrr.v2n3p303	taxonIdCalais045_PlotC10/decimalLatitude/-20.40953/decimalLongitude/-43.50156
taxonIdCalais046	PlotCalais10_La20La40953Lo43Lo50156	Itacolomi State Park, Calais, MG, Brazil	BR	present	native	2008-10-21T09:26Z	http://dx.doi.org/10.5539/enrr.v2n3p304	taxonIdCalais046_PlotC10/decimalLatitude/-20.40953/decimalLongitude/-43.50156
taxonIdCalais049	PlotCalais10_La20La40953Lo43Lo50156	Itacolomi State Park, Calais, MG, Brazil	BR	present	native	2008-10-21T09:26Z	http://dx.doi.org/10.5539/enrr.v2n3p313	taxonIdCalais049_PlotC10/decimalLatitude/-20.40953/decimalLongitude/-43.50156
taxonIdCalais052	PlotCalais10_La20La40953Lo43Lo50156	Itacolomi State Park, Calais, MG, Brazil	BR	present	native	2008-10-21T09:26Z	http://dx.doi.org/10.5539/enrr.v2n3p329	taxonIdCalais052_PlotC10/decimalLatitude/-20.40953/decimalLongitude/-43.50156
taxonIdCalais062	PlotCalais10_La20La40953Lo43Lo50156	Itacolomi State Park, Calais, MG, Brazil	BR	present	native	2008-10-21T09:26Z	http://dx.doi.org/10.5539/enrr.v2n3p359	taxonIdCalais062_PlotC10/decimalLatitude/-20.40953/decimalLongitude/-43.50156
taxonIdCalais063	PlotCalais10_La20La40953Lo43Lo50156	Itacolomi State Park, Calais, MG, Brazil	BR	present	native	2008-10-21T09:26Z	http://dx.doi.org/10.5539/enrr.v2n3p368	taxonIdCalais063_PlotC10/decimalLatitude/-20.40953/decimalLongitude/-43.50156
taxonIdCalais066	PlotCalais10_La20La40953Lo43Lo50156	Itacolomi State Park, Calais, MG, Brazil	BR	present	native	2008-10-21T09:26Z	http://dx.doi.org/10.5539/enrr.v2n3p382	taxonIdCalais066_PlotC10/decimalLatitude/-20.40953/decimalLongitude/-43.50156
taxonIdCalais081	PlotCalais10_La20La40953Lo43Lo50156	Itacolomi State Park, Calais, MG, Brazil	BR	present	invasive	2008-10-21T09:26Z	http://dx.doi.org/10.5539/enrr.v2n3p471	taxonIdCalais081_PlotC10/decimalLatitude/-20.40953/decimalLongitude/-43.50156
taxonIdCalais083	PlotCalais10_La20La40953Lo43Lo50156	Itacolomi State Park, Calais, MG, Brazil	BR	present	native	2008-10-21T09:26Z	http://dx.doi.org/10.5539/enrr.v2n3p489	taxonIdCalais083_PlotC10/decimalLatitude/-20.40953/decimalLongitude/-43.50156
taxonIdCalais085	PlotCalais10_La20La40953Lo43Lo50156	Itacolomi State Park, Calais, MG, Brazil	BR	present	native	2008-10-21T09:26Z	http://dx.doi.org/10.5539/enrr.v2n3p496	taxonIdCalais085_PlotC10/decimalLatitude/-20.40953/decimalLongitude/-43.50156
taxonIdCalais086	PlotCalais10_La20La40953Lo43Lo50156	Itacolomi State Park, Calais, MG, Brazil	BR	present	native	2008-10-21T09:26Z	http://dx.doi.org/10.5539/enrr.v2n3p501	taxonIdCalais086_PlotC10/decimalLatitude/-20.40953/decimalLongitude/-43.50156
taxonIdCalais088	PlotCalais10_La20La40953Lo43Lo50156	Itacolomi State Park, Calais, MG, Brazil	BR	present	invasive	2008-10-21T09:26Z	http://dx.doi.org/10.5539/enrr.v2n3p508	taxonIdCalais088_PlotC10/decimalLatitude/-20.40953/decimalLongitude/-43.50156
taxonIdCalais093	PlotCalais10_La20La40953Lo43Lo50156	Itacolomi State Park, Calais, MG, Brazil	BR	present	native	2008-10-21T09:26Z	http://dx.doi.org/10.5539/enrr.v2n3p527	taxonIdCalais093_PlotC10/decimalLatitude/-20.40953/decimalLongitude/-43.50156
taxonIdCalais094	PlotCalais10_La20La40953Lo43Lo50156	Itacolomi State Park, Calais, MG, Brazil	BR	present	native	2008-10-21T09:26Z	http://dx.doi.org/10.5539/enrr.v2n3p531	taxonIdCalais094_PlotC10/decimalLatitude/-20.40953/decimalLongitude/-43.50156
taxonIdCalais097	PlotCalais10_La20La40953Lo43Lo50156	Itacolomi State Park, Calais, MG, Brazil	BR	present	native	2008-10-21T09:26Z	http://dx.doi.org/10.5539/enrr.v2n3p541	taxonIdCalais097_PlotC10/decimalLatitude/-20.40953/decimalLongitude/-43.50156
taxonIdCalais104	PlotCalais10_La20La40953Lo43Lo50156	Itacolomi State Park, Calais, MG, Brazil	BR	present	native	2008-10-21T09:26Z	http://dx.doi.org/10.5539/enrr.v2n3p576	taxonIdCalais104_PlotC10/decimalLatitude/-20.40953/decimalLongitude/-43.50156
taxonIdCalais105	PlotCalais10_La20La40953Lo43Lo50156	Itacolomi State Park, Calais, MG, Brazil	BR	present	native	2008-10-21T09:26Z	http://dx.doi.org/10.5539/enrr.v2n3p582	taxonIdCalais105_PlotC10/decimalLatitude/-20.40953/decimalLongitude/-43.50156
taxonIdCalais106	PlotCalais10_La20La40953Lo43Lo50156	Itacolomi State Park, Calais, MG, Brazil	BR	present	native	2008-10-21T09:26Z	http://dx.doi.org/10.5539/enrr.v2n3p586	taxonIdCalais106_PlotC10/decimalLatitude/-20.40953/decimalLongitude/-43.50156
taxonIdCalais107	PlotCalais10_La20La40953Lo43Lo50156	Itacolomi State Park, Calais, MG, Brazil	BR	present	native	2008-10-21T09:26Z	http://dx.doi.org/10.5539/enrr.v2n3p593	taxonIdCalais107_PlotC10/decimalLatitude/-20.40953/decimalLongitude/-43.50156
taxonIdCalais007	PlotCalais11_La20La41027Lo43Lo50182	Itacolomi State Park, Calais, MG, Brazil	BR	present	native	2008-10-21T09:26Z	http://dx.doi.org/10.5539/enrr.v2n3p134	taxonIdCalais007_PlotC11/decimalLatitude/-20.41027/decimalLongitude/-43.50182
taxonIdCalais010	PlotCalais11_La20La41027Lo43Lo50182	Itacolomi State Park, Calais, MG, Brazil	BR	present	native	2008-10-21T09:26Z	http://dx.doi.org/10.5539/enrr.v2n3p152	taxonIdCalais010_PlotC11/decimalLatitude/-20.41027/decimalLongitude/-43.50182
taxonIdCalais011	PlotCalais11_La20La41027Lo43Lo50182	Itacolomi State Park, Calais, MG, Brazil	BR	present	native	2008-10-21T09:26Z	http://dx.doi.org/10.5539/enrr.v2n3p165	taxonIdCalais011_PlotC11/decimalLatitude/-20.41027/decimalLongitude/-43.50182
taxonIdCalais013	PlotCalais11_La20La41027Lo43Lo50182	Itacolomi State Park, Calais, MG, Brazil	BR	present	native	2008-10-21T09:26Z	http://dx.doi.org/10.5539/enrr.v2n3p172	taxonIdCalais013_PlotC11/decimalLatitude/-20.41027/decimalLongitude/-43.50182
taxonIdCalais014	PlotCalais11_La20La41027Lo43Lo50182	Itacolomi State Park, Calais, MG, Brazil	BR	present	native	2008-10-21T09:26Z	http://dx.doi.org/10.5539/enrr.v2n3p177	taxonIdCalais014_PlotC11/decimalLatitude/-20.41027/decimalLongitude/-43.50182
taxonIdCalais015	PlotCalais11_La20La41027Lo43Lo50182	Itacolomi State Park, Calais, MG, Brazil	BR	present	native	2008-10-21T09:26Z	http://dx.doi.org/10.5539/enrr.v2n3p185	taxonIdCalais015_PlotC11/decimalLatitude/-20.41027/decimalLongitude/-43.50182
taxonIdCalais016	PlotCalais11_La20La41027Lo43Lo50182	Itacolomi State Park, Calais, MG, Brazil	BR	present	native	2008-10-21T09:26Z	http://dx.doi.org/10.5539/enrr.v2n3p195	taxonIdCalais016_PlotC11/decimalLatitude/-20.41027/decimalLongitude/-43.50182
taxonIdCalais020	PlotCalais11_La20La41027Lo43Lo50182	Itacolomi State Park, Calais, MG, Brazil	BR	present	native	2008-10-21T09:26Z	http://dx.doi.org/10.5539/enrr.v2n3p211	taxonIdCalais020_PlotC11/decimalLatitude/-20.41027/decimalLongitude/-43.50182
taxonIdCalais022	PlotCalais11_La20La41027Lo43Lo50182	Itacolomi State Park, Calais, MG, Brazil	BR	present	native	2008-10-21T09:26Z	http://dx.doi.org/10.5539/enrr.v2n3p224	taxonIdCalais022_PlotC11/decimalLatitude/-20.41027/decimalLongitude/-43.50182
taxonIdCalais024	PlotCalais11_La20La41027Lo43Lo50182	Itacolomi State Park, Calais, MG, Brazil	BR	present	native	2008-10-21T09:26Z	http://dx.doi.org/10.5539/enrr.v2n3p231	taxonIdCalais024_PlotC11/decimalLatitude/-20.41027/decimalLongitude/-43.50182
taxonIdCalais026	PlotCalais11_La20La41027Lo43Lo50182	Itacolomi State Park, Calais, MG, Brazil	BR	present	native	2008-10-21T09:26Z	http://dx.doi.org/10.5539/enrr.v2n3p241	taxonIdCalais026_PlotC11/decimalLatitude/-20.41027/decimalLongitude/-43.50182
taxonIdCalais036	PlotCalais11_La20La41027Lo43Lo50182	Itacolomi State Park, Calais, MG, Brazil	BR	present	native	2008-10-21T09:26Z	http://dx.doi.org/10.5539/enrr.v2n3p269	taxonIdCalais036_PlotC11/decimalLatitude/-20.41027/decimalLongitude/-43.50182
taxonIdCalais044	PlotCalais11_La20La41027Lo43Lo50182	Itacolomi State Park, Calais, MG, Brazil	BR	present	native	2008-10-21T09:26Z	http://dx.doi.org/10.5539/enrr.v2n3p298	taxonIdCalais044_PlotC11/decimalLatitude/-20.41027/decimalLongitude/-43.50182
taxonIdCalais056	PlotCalais11_La20La41027Lo43Lo50182	Itacolomi State Park, Calais, MG, Brazil	BR	present	native	2008-10-21T09:26Z	http://dx.doi.org/10.5539/enrr.v2n3p340	taxonIdCalais056_PlotC11/decimalLatitude/-20.41027/decimalLongitude/-43.50182
taxonIdCalais062	PlotCalais11_La20La41027Lo43Lo50182	Itacolomi State Park, Calais, MG, Brazil	BR	present	native	2008-10-21T09:26Z	http://dx.doi.org/10.5539/enrr.v2n3p360	taxonIdCalais062_PlotC11/decimalLatitude/-20.41027/decimalLongitude/-43.50182
taxonIdCalais064	PlotCalais11_La20La41027Lo43Lo50182	Itacolomi State Park, Calais, MG, Brazil	BR	present	native	2008-10-21T09:26Z	http://dx.doi.org/10.5539/enrr.v2n3p371	taxonIdCalais064_PlotC11/decimalLatitude/-20.41027/decimalLongitude/-43.50182
taxonIdCalais066	PlotCalais11_La20La41027Lo43Lo50182	Itacolomi State Park, Calais, MG, Brazil	BR	present	native	2008-10-21T09:26Z	http://dx.doi.org/10.5539/enrr.v2n3p383	taxonIdCalais066_PlotC11/decimalLatitude/-20.41027/decimalLongitude/-43.50182
taxonIdCalais068	PlotCalais11_La20La41027Lo43Lo50182	Itacolomi State Park, Calais, MG, Brazil	BR	present	native	2008-10-21T09:26Z	http://dx.doi.org/10.5539/enrr.v2n3p397	taxonIdCalais068_PlotC11/decimalLatitude/-20.41027/decimalLongitude/-43.50182
taxonIdCalais069	PlotCalais11_La20La41027Lo43Lo50182	Itacolomi State Park, Calais, MG, Brazil	BR	present	native	2008-10-21T09:26Z	http://dx.doi.org/10.5539/enrr.v2n3p407	taxonIdCalais069_PlotC11/decimalLatitude/-20.41027/decimalLongitude/-43.50182
taxonIdCalais070	PlotCalais11_La20La41027Lo43Lo50182	Itacolomi State Park, Calais, MG, Brazil	BR	present	native	2008-10-21T09:26Z	http://dx.doi.org/10.5539/enrr.v2n3p411	taxonIdCalais070_PlotC11/decimalLatitude/-20.41027/decimalLongitude/-43.50182
taxonIdCalais074	PlotCalais11_La20La41027Lo43Lo50182	Itacolomi State Park, Calais, MG, Brazil	BR	present	native	2008-10-21T09:26Z	http://dx.doi.org/10.5539/enrr.v2n3p425	taxonIdCalais074_PlotC11/decimalLatitude/-20.41027/decimalLongitude/-43.50182
taxonIdCalais076	PlotCalais11_La20La41027Lo43Lo50182	Itacolomi State Park, Calais, MG, Brazil	BR	present	native	2008-10-21T09:26Z	http://dx.doi.org/10.5539/enrr.v2n3p438	taxonIdCalais076_PlotC11/decimalLatitude/-20.41027/decimalLongitude/-43.50182
taxonIdCalais078	PlotCalais11_La20La41027Lo43Lo50182	Itacolomi State Park, Calais, MG, Brazil	BR	present	native	2008-10-21T09:26Z	http://dx.doi.org/10.5539/enrr.v2n3p453	taxonIdCalais078_PlotC11/decimalLatitude/-20.41027/decimalLongitude/-43.50182
taxonIdCalais086	PlotCalais11_La20La41027Lo43Lo50182	Itacolomi State Park, Calais, MG, Brazil	BR	present	native	2008-10-21T09:26Z	http://dx.doi.org/10.5539/enrr.v2n3p502	taxonIdCalais086_PlotC11/decimalLatitude/-20.41027/decimalLongitude/-43.50182
taxonIdCalais091	PlotCalais11_La20La41027Lo43Lo50182	Itacolomi State Park, Calais, MG, Brazil	BR	present	native	2008-10-21T09:26Z	http://dx.doi.org/10.5539/enrr.v2n3p515	taxonIdCalais091_PlotC11/decimalLatitude/-20.41027/decimalLongitude/-43.50182
taxonIdCalais097	PlotCalais11_La20La41027Lo43Lo50182	Itacolomi State Park, Calais, MG, Brazil	BR	present	native	2008-10-21T09:26Z	http://dx.doi.org/10.5539/enrr.v2n3p542	taxonIdCalais097_PlotC11/decimalLatitude/-20.41027/decimalLongitude/-43.50182
taxonIdCalais100	PlotCalais11_La20La41027Lo43Lo50182	Itacolomi State Park, Calais, MG, Brazil	BR	present	native	2008-10-21T09:26Z	http://dx.doi.org/10.5539/enrr.v2n3p556	taxonIdCalais100_PlotC11/decimalLatitude/-20.41027/decimalLongitude/-43.50182
taxonIdCalais101	PlotCalais11_La20La41027Lo43Lo50182	Itacolomi State Park, Calais, MG, Brazil	BR	present	native	2008-10-21T09:26Z	http://dx.doi.org/10.5539/enrr.v2n3p565	taxonIdCalais101_PlotC11/decimalLatitude/-20.41027/decimalLongitude/-43.50182
taxonIdCalais106	PlotCalais11_La20La41027Lo43Lo50182	Itacolomi State Park, Calais, MG, Brazil	BR	present	native	2008-10-21T09:26Z	http://dx.doi.org/10.5539/enrr.v2n3p587	taxonIdCalais106_PlotC11/decimalLatitude/-20.41027/decimalLongitude/-43.50182
taxonIdCalais107	PlotCalais11_La20La41027Lo43Lo50182	Itacolomi State Park, Calais, MG, Brazil	BR	present	native	2008-10-21T09:26Z	http://dx.doi.org/10.5539/enrr.v2n3p594	taxonIdCalais107_PlotC11/decimalLatitude/-20.41027/decimalLongitude/-43.50182
taxonIdCalais004	PlotCalais12_La20La41016Lo43Lo50170	Itacolomi State Park, Calais, MG, Brazil	BR	present	native	2008-10-21T09:26Z	http://dx.doi.org/10.5539/enrr.v2n3p120	taxonIdCalais004_PlotC12/decimalLatitude/-20.41016/decimalLongitude/-43.50170
taxonIdCalais007	PlotCalais12_La20La41016Lo43Lo50170	Itacolomi State Park, Calais, MG, Brazil	BR	present	native	2008-10-21T09:26Z	http://dx.doi.org/10.5539/enrr.v2n3p135	taxonIdCalais007_PlotC12/decimalLatitude/-20.41016/decimalLongitude/-43.50170
taxonIdCalais010	PlotCalais12_La20La41016Lo43Lo50170	Itacolomi State Park, Calais, MG, Brazil	BR	present	native	2008-10-21T09:26Z	http://dx.doi.org/10.5539/enrr.v2n3p153	taxonIdCalais010_PlotC12/decimalLatitude/-20.41016/decimalLongitude/-43.50170
taxonIdCalais011	PlotCalais12_La20La41016Lo43Lo50170	Itacolomi State Park, Calais, MG, Brazil	BR	present	native	2008-10-21T09:26Z	http://dx.doi.org/10.5539/enrr.v2n3p166	taxonIdCalais011_PlotC12/decimalLatitude/-20.41016/decimalLongitude/-43.50170
taxonIdCalais016	PlotCalais12_La20La41016Lo43Lo50170	Itacolomi State Park, Calais, MG, Brazil	BR	present	native	2008-10-21T09:26Z	http://dx.doi.org/10.5539/enrr.v2n3p196	taxonIdCalais016_PlotC12/decimalLatitude/-20.41016/decimalLongitude/-43.50170
taxonIdCalais018	PlotCalais12_La20La41016Lo43Lo50170	Itacolomi State Park, Calais, MG, Brazil	BR	present	native	2008-10-21T09:26Z	http://dx.doi.org/10.5539/enrr.v2n3p203	taxonIdCalais018_PlotC12/decimalLatitude/-20.41016/decimalLongitude/-43.50170
taxonIdCalais020	PlotCalais12_La20La41016Lo43Lo50170	Itacolomi State Park, Calais, MG, Brazil	BR	present	native	2008-10-21T09:26Z	http://dx.doi.org/10.5539/enrr.v2n3p212	taxonIdCalais020_PlotC12/decimalLatitude/-20.41016/decimalLongitude/-43.50170
taxonIdCalais022	PlotCalais12_La20La41016Lo43Lo50170	Itacolomi State Park, Calais, MG, Brazil	BR	present	native	2008-10-21T09:26Z	http://dx.doi.org/10.5539/enrr.v2n3p225	taxonIdCalais022_PlotC12/decimalLatitude/-20.41016/decimalLongitude/-43.50170
taxonIdCalais031	PlotCalais12_La20La41016Lo43Lo50170	Itacolomi State Park, Calais, MG, Brazil	BR	present	native	2008-10-21T09:26Z	http://dx.doi.org/10.5539/enrr.v2n3p255	taxonIdCalais031_PlotC12/decimalLatitude/-20.41016/decimalLongitude/-43.50170
taxonIdCalais038	PlotCalais12_La20La41016Lo43Lo50170	Itacolomi State Park, Calais, MG, Brazil	BR	present	native	2008-10-21T09:26Z	http://dx.doi.org/10.5539/enrr.v2n3p275	taxonIdCalais038_PlotC12/decimalLatitude/-20.41016/decimalLongitude/-43.50170
taxonIdCalais044	PlotCalais12_La20La41016Lo43Lo50170	Itacolomi State Park, Calais, MG, Brazil	BR	present	native	2008-10-21T09:26Z	http://dx.doi.org/10.5539/enrr.v2n3p299	taxonIdCalais044_PlotC12/decimalLatitude/-20.41016/decimalLongitude/-43.50170
taxonIdCalais050	PlotCalais12_La20La41016Lo43Lo50170	Itacolomi State Park, Calais, MG, Brazil	BR	present	native	2008-10-21T09:26Z	http://dx.doi.org/10.5539/enrr.v2n3p316	taxonIdCalais050_PlotC12/decimalLatitude/-20.41016/decimalLongitude/-43.50170
taxonIdCalais051	PlotCalais12_La20La41016Lo43Lo50170	Itacolomi State Park, Calais, MG, Brazil	BR	present	native	2008-10-21T09:26Z	http://dx.doi.org/10.5539/enrr.v2n3p321	taxonIdCalais051_PlotC12/decimalLatitude/-20.41016/decimalLongitude/-43.50170
taxonIdCalais056	PlotCalais12_La20La41016Lo43Lo50170	Itacolomi State Park, Calais, MG, Brazil	BR	present	native	2008-10-21T09:26Z	http://dx.doi.org/10.5539/enrr.v2n3p341	taxonIdCalais056_PlotC12/decimalLatitude/-20.41016/decimalLongitude/-43.50170
taxonIdCalais062	PlotCalais12_La20La41016Lo43Lo50170	Itacolomi State Park, Calais, MG, Brazil	BR	present	native	2008-10-21T09:26Z	http://dx.doi.org/10.5539/enrr.v2n3p361	taxonIdCalais062_PlotC12/decimalLatitude/-20.41016/decimalLongitude/-43.50170
taxonIdCalais068	PlotCalais12_La20La41016Lo43Lo50170	Itacolomi State Park, Calais, MG, Brazil	BR	present	native	2008-10-21T09:26Z	http://dx.doi.org/10.5539/enrr.v2n3p398	taxonIdCalais068_PlotC12/decimalLatitude/-20.41016/decimalLongitude/-43.50170
taxonIdCalais074	PlotCalais12_La20La41016Lo43Lo50170	Itacolomi State Park, Calais, MG, Brazil	BR	present	native	2008-10-21T09:26Z	http://dx.doi.org/10.5539/enrr.v2n3p426	taxonIdCalais074_PlotC12/decimalLatitude/-20.41016/decimalLongitude/-43.50170
taxonIdCalais076	PlotCalais12_La20La41016Lo43Lo50170	Itacolomi State Park, Calais, MG, Brazil	BR	present	native	2008-10-21T09:26Z	http://dx.doi.org/10.5539/enrr.v2n3p439	taxonIdCalais076_PlotC12/decimalLatitude/-20.41016/decimalLongitude/-43.50170
taxonIdCalais078	PlotCalais12_La20La41016Lo43Lo50170	Itacolomi State Park, Calais, MG, Brazil	BR	present	native	2008-10-21T09:26Z	http://dx.doi.org/10.5539/enrr.v2n3p454	taxonIdCalais078_PlotC12/decimalLatitude/-20.41016/decimalLongitude/-43.50170
taxonIdCalais081	PlotCalais12_La20La41016Lo43Lo50170	Itacolomi State Park, Calais, MG, Brazil	BR	present	invasive	2008-10-21T09:26Z	http://dx.doi.org/10.5539/enrr.v2n3p472	taxonIdCalais081_PlotC12/decimalLatitude/-20.41016/decimalLongitude/-43.50170
taxonIdCalais100	PlotCalais12_La20La41016Lo43Lo50170	Itacolomi State Park, Calais, MG, Brazil	BR	present	native	2008-10-21T09:26Z	http://dx.doi.org/10.5539/enrr.v2n3p557	taxonIdCalais100_PlotC12/decimalLatitude/-20.41016/decimalLongitude/-43.50170
taxonIdCalais104	PlotCalais12_La20La41016Lo43Lo50170	Itacolomi State Park, Calais, MG, Brazil	BR	present	native	2008-10-21T09:26Z	http://dx.doi.org/10.5539/enrr.v2n3p577	taxonIdCalais104_PlotC12/decimalLatitude/-20.41016/decimalLongitude/-43.50170
taxonIdCalais004	PlotCalais13_La20La41000Lo43Lo50159	Itacolomi State Park, Calais, MG, Brazil	BR	present	native	2008-10-21T09:26Z	http://dx.doi.org/10.5539/enrr.v2n3p121	taxonIdCalais004_PlotC13/decimalLatitude/-20.41000/decimalLongitude/-43.50159
taxonIdCalais007	PlotCalais13_La20La41000Lo43Lo50159	Itacolomi State Park, Calais, MG, Brazil	BR	present	native	2008-10-21T09:26Z	http://dx.doi.org/10.5539/enrr.v2n3p136	taxonIdCalais007_PlotC13/decimalLatitude/-20.41000/decimalLongitude/-43.50159
taxonIdCalais008	PlotCalais13_La20La41000Lo43Lo50159	Itacolomi State Park, Calais, MG, Brazil	BR	present	native	2008-10-21T09:26Z	http://dx.doi.org/10.5539/enrr.v2n3p144	taxonIdCalais008_PlotC13/decimalLatitude/-20.41000/decimalLongitude/-43.50159
taxonIdCalais010	PlotCalais13_La20La41000Lo43Lo50159	Itacolomi State Park, Calais, MG, Brazil	BR	present	native	2008-10-21T09:26Z	http://dx.doi.org/10.5539/enrr.v2n3p154	taxonIdCalais010_PlotC13/decimalLatitude/-20.41000/decimalLongitude/-43.50159
taxonIdCalais014	PlotCalais13_La20La41000Lo43Lo50159	Itacolomi State Park, Calais, MG, Brazil	BR	present	native	2008-10-21T09:26Z	http://dx.doi.org/10.5539/enrr.v2n3p178	taxonIdCalais014_PlotC13/decimalLatitude/-20.41000/decimalLongitude/-43.50159
taxonIdCalais026	PlotCalais13_La20La41000Lo43Lo50159	Itacolomi State Park, Calais, MG, Brazil	BR	present	native	2008-10-21T09:26Z	http://dx.doi.org/10.5539/enrr.v2n3p242	taxonIdCalais026_PlotC13/decimalLatitude/-20.41000/decimalLongitude/-43.50159
taxonIdCalais034	PlotCalais13_La20La41000Lo43Lo50159	Itacolomi State Park, Calais, MG, Brazil	BR	present	native	2008-10-21T09:26Z	http://dx.doi.org/10.5539/enrr.v2n3p264	taxonIdCalais034_PlotC13/decimalLatitude/-20.41000/decimalLongitude/-43.50159
taxonIdCalais036	PlotCalais13_La20La41000Lo43Lo50159	Itacolomi State Park, Calais, MG, Brazil	BR	present	native	2008-10-21T09:26Z	http://dx.doi.org/10.5539/enrr.v2n3p270	taxonIdCalais036_PlotC13/decimalLatitude/-20.41000/decimalLongitude/-43.50159
taxonIdCalais049	PlotCalais13_La20La41000Lo43Lo50159	Itacolomi State Park, Calais, MG, Brazil	BR	present	native	2008-10-21T09:26Z	http://dx.doi.org/10.5539/enrr.v2n3p314	taxonIdCalais049_PlotC13/decimalLatitude/-20.41000/decimalLongitude/-43.50159
taxonIdCalais054	PlotCalais13_La20La41000Lo43Lo50159	Itacolomi State Park, Calais, MG, Brazil	BR	present	native	2008-10-21T09:26Z	http://dx.doi.org/10.5539/enrr.v2n3p333	taxonIdCalais054_PlotC13/decimalLatitude/-20.41000/decimalLongitude/-43.50159
taxonIdCalais059	PlotCalais13_La20La41000Lo43Lo50159	Itacolomi State Park, Calais, MG, Brazil	BR	present	native	2008-10-21T09:26Z	http://dx.doi.org/10.5539/enrr.v2n3p349	taxonIdCalais059_PlotC13/decimalLatitude/-20.41000/decimalLongitude/-43.50159
taxonIdCalais062	PlotCalais13_La20La41000Lo43Lo50159	Itacolomi State Park, Calais, MG, Brazil	BR	present	native	2008-10-21T09:26Z	http://dx.doi.org/10.5539/enrr.v2n3p362	taxonIdCalais062_PlotC13/decimalLatitude/-20.41000/decimalLongitude/-43.50159
taxonIdCalais064	PlotCalais13_La20La41000Lo43Lo50159	Itacolomi State Park, Calais, MG, Brazil	BR	present	native	2008-10-21T09:26Z	http://dx.doi.org/10.5539/enrr.v2n3p372	taxonIdCalais064_PlotC13/decimalLatitude/-20.41000/decimalLongitude/-43.50159
taxonIdCalais068	PlotCalais13_La20La41000Lo43Lo50159	Itacolomi State Park, Calais, MG, Brazil	BR	present	native	2008-10-21T09:26Z	http://dx.doi.org/10.5539/enrr.v2n3p399	taxonIdCalais068_PlotC13/decimalLatitude/-20.41000/decimalLongitude/-43.50159
taxonIdCalais074	PlotCalais13_La20La41000Lo43Lo50159	Itacolomi State Park, Calais, MG, Brazil	BR	present	native	2008-10-21T09:26Z	http://dx.doi.org/10.5539/enrr.v2n3p427	taxonIdCalais074_PlotC13/decimalLatitude/-20.41000/decimalLongitude/-43.50159
taxonIdCalais076	PlotCalais13_La20La41000Lo43Lo50159	Itacolomi State Park, Calais, MG, Brazil	BR	present	native	2008-10-21T09:26Z	http://dx.doi.org/10.5539/enrr.v2n3p440	taxonIdCalais076_PlotC13/decimalLatitude/-20.41000/decimalLongitude/-43.50159
taxonIdCalais077	PlotCalais13_La20La41000Lo43Lo50159	Itacolomi State Park, Calais, MG, Brazil	BR	present	invasive	2008-10-21T09:26Z	http://dx.doi.org/10.5539/enrr.v2n3p445	taxonIdCalais077_PlotC13/decimalLatitude/-20.41000/decimalLongitude/-43.50159
taxonIdCalais078	PlotCalais13_La20La41000Lo43Lo50159	Itacolomi State Park, Calais, MG, Brazil	BR	present	native	2008-10-21T09:26Z	http://dx.doi.org/10.5539/enrr.v2n3p455	taxonIdCalais078_PlotC13/decimalLatitude/-20.41000/decimalLongitude/-43.50159
taxonIdCalais080	PlotCalais13_La20La41000Lo43Lo50159	Itacolomi State Park, Calais, MG, Brazil	BR	present	native	2008-10-21T09:26Z	http://dx.doi.org/10.5539/enrr.v2n3p460	taxonIdCalais080_PlotC13/decimalLatitude/-20.41000/decimalLongitude/-43.50159
taxonIdCalais081	PlotCalais13_La20La41000Lo43Lo50159	Itacolomi State Park, Calais, MG, Brazil	BR	present	invasive	2008-10-21T09:26Z	http://dx.doi.org/10.5539/enrr.v2n3p473	taxonIdCalais081_PlotC13/decimalLatitude/-20.41000/decimalLongitude/-43.50159
taxonIdCalais082	PlotCalais13_La20La41000Lo43Lo50159	Itacolomi State Park, Calais, MG, Brazil	BR	present	native	2008-10-21T09:26Z	http://dx.doi.org/10.5539/enrr.v2n3p479	taxonIdCalais082_PlotC13/decimalLatitude/-20.41000/decimalLongitude/-43.50159
taxonIdCalais083	PlotCalais13_La20La41000Lo43Lo50159	Itacolomi State Park, Calais, MG, Brazil	BR	present	native	2008-10-21T09:26Z	http://dx.doi.org/10.5539/enrr.v2n3p490	taxonIdCalais083_PlotC13/decimalLatitude/-20.41000/decimalLongitude/-43.50159
taxonIdCalais096	PlotCalais13_La20La41000Lo43Lo50159	Itacolomi State Park, Calais, MG, Brazil	BR	present	native	2008-10-21T09:26Z	http://dx.doi.org/10.5539/enrr.v2n3p533	taxonIdCalais096_PlotC13/decimalLatitude/-20.41000/decimalLongitude/-43.50159
taxonIdCalais100	PlotCalais13_La20La41000Lo43Lo50159	Itacolomi State Park, Calais, MG, Brazil	BR	present	native	2008-10-21T09:26Z	http://dx.doi.org/10.5539/enrr.v2n3p558	taxonIdCalais100_PlotC13/decimalLatitude/-20.41000/decimalLongitude/-43.50159
taxonIdCalais101	PlotCalais13_La20La41000Lo43Lo50159	Itacolomi State Park, Calais, MG, Brazil	BR	present	native	2008-10-21T09:26Z	http://dx.doi.org/10.5539/enrr.v2n3p567	taxonIdCalais101_PlotC13/decimalLatitude/-20.41000/decimalLongitude/-43.50159
taxonIdCalais107	PlotCalais13_La20La41000Lo43Lo50159	Itacolomi State Park, Calais, MG, Brazil	BR	present	native	2008-10-21T09:26Z	http://dx.doi.org/10.5539/enrr.v2n3p595	taxonIdCalais107_PlotC13/decimalLatitude/-20.41000/decimalLongitude/-43.50159
taxonIdCalais007	PlotCalais14_La20La40982Lo43Lo50149	Itacolomi State Park, Calais, MG, Brazil	BR	present	native	2008-10-21T09:26Z	http://dx.doi.org/10.5539/enrr.v2n3p137	taxonIdCalais007_PlotC14/decimalLatitude/-20.40982/decimalLongitude/-43.50149
taxonIdCalais010	PlotCalais14_La20La40982Lo43Lo50149	Itacolomi State Park, Calais, MG, Brazil	BR	present	native	2008-10-21T09:26Z	http://dx.doi.org/10.5539/enrr.v2n3p155	taxonIdCalais010_PlotC14/decimalLatitude/-20.40982/decimalLongitude/-43.50149
taxonIdCalais011	PlotCalais14_La20La40982Lo43Lo50149	Itacolomi State Park, Calais, MG, Brazil	BR	present	native	2008-10-21T09:26Z	http://dx.doi.org/10.5539/enrr.v2n3p167	taxonIdCalais011_PlotC14/decimalLatitude/-20.40982/decimalLongitude/-43.50149
taxonIdCalais015	PlotCalais14_La20La40982Lo43Lo50149	Itacolomi State Park, Calais, MG, Brazil	BR	present	native	2008-10-21T09:26Z	http://dx.doi.org/10.5539/enrr.v2n3p186	taxonIdCalais015_PlotC14/decimalLatitude/-20.40982/decimalLongitude/-43.50149
taxonIdCalais016	PlotCalais14_La20La40982Lo43Lo50149	Itacolomi State Park, Calais, MG, Brazil	BR	present	native	2008-10-21T09:26Z	http://dx.doi.org/10.5539/enrr.v2n3p197	taxonIdCalais016_PlotC14/decimalLatitude/-20.40982/decimalLongitude/-43.50149
taxonIdCalais020	PlotCalais14_La20La40982Lo43Lo50149	Itacolomi State Park, Calais, MG, Brazil	BR	present	native	2008-10-21T09:26Z	http://dx.doi.org/10.5539/enrr.v2n3p213	taxonIdCalais020_PlotC14/decimalLatitude/-20.40982/decimalLongitude/-43.50149
taxonIdCalais022	PlotCalais14_La20La40982Lo43Lo50149	Itacolomi State Park, Calais, MG, Brazil	BR	present	native	2008-10-21T09:26Z	http://dx.doi.org/10.5539/enrr.v2n3p226	taxonIdCalais022_PlotC14/decimalLatitude/-20.40982/decimalLongitude/-43.50149
taxonIdCalais026	PlotCalais14_La20La40982Lo43Lo50149	Itacolomi State Park, Calais, MG, Brazil	BR	present	native	2008-10-21T09:26Z	http://dx.doi.org/10.5539/enrr.v2n3p243	taxonIdCalais026_PlotC14/decimalLatitude/-20.40982/decimalLongitude/-43.50149
taxonIdCalais036	PlotCalais14_La20La40982Lo43Lo50149	Itacolomi State Park, Calais, MG, Brazil	BR	present	native	2008-10-21T09:26Z	http://dx.doi.org/10.5539/enrr.v2n3p271	taxonIdCalais036_PlotC14/decimalLatitude/-20.40982/decimalLongitude/-43.50149
taxonIdCalais049	PlotCalais14_La20La40982Lo43Lo50149	Itacolomi State Park, Calais, MG, Brazil	BR	present	native	2008-10-21T09:26Z	http://dx.doi.org/10.5539/enrr.v2n3p315	taxonIdCalais049_PlotC14/decimalLatitude/-20.40982/decimalLongitude/-43.50149
taxonIdCalais051	PlotCalais14_La20La40982Lo43Lo50149	Itacolomi State Park, Calais, MG, Brazil	BR	present	native	2008-10-21T09:26Z	http://dx.doi.org/10.5539/enrr.v2n3p322	taxonIdCalais051_PlotC14/decimalLatitude/-20.40982/decimalLongitude/-43.50149
taxonIdCalais060	PlotCalais14_La20La40982Lo43Lo50149	Itacolomi State Park, Calais, MG, Brazil	BR	present	native	2008-10-21T09:26Z	http://dx.doi.org/10.5539/enrr.v2n3p351	taxonIdCalais060_PlotC14/decimalLatitude/-20.40982/decimalLongitude/-43.50149
taxonIdCalais064	PlotCalais14_La20La40982Lo43Lo50149	Itacolomi State Park, Calais, MG, Brazil	BR	present	native	2008-10-21T09:26Z	http://dx.doi.org/10.5539/enrr.v2n3p373	taxonIdCalais064_PlotC14/decimalLatitude/-20.40982/decimalLongitude/-43.50149
taxonIdCalais066	PlotCalais14_La20La40982Lo43Lo50149	Itacolomi State Park, Calais, MG, Brazil	BR	present	native	2008-10-21T09:26Z	http://dx.doi.org/10.5539/enrr.v2n3p384	taxonIdCalais066_PlotC14/decimalLatitude/-20.40982/decimalLongitude/-43.50149
taxonIdCalais068	PlotCalais14_La20La40982Lo43Lo50149	Itacolomi State Park, Calais, MG, Brazil	BR	present	native	2008-10-21T09:26Z	http://dx.doi.org/10.5539/enrr.v2n3p400	taxonIdCalais068_PlotC14/decimalLatitude/-20.40982/decimalLongitude/-43.50149
taxonIdCalais074	PlotCalais14_La20La40982Lo43Lo50149	Itacolomi State Park, Calais, MG, Brazil	BR	present	native	2008-10-21T09:26Z	http://dx.doi.org/10.5539/enrr.v2n3p428	taxonIdCalais074_PlotC14/decimalLatitude/-20.40982/decimalLongitude/-43.50149
taxonIdCalais076	PlotCalais14_La20La40982Lo43Lo50149	Itacolomi State Park, Calais, MG, Brazil	BR	present	native	2008-10-21T09:26Z	http://dx.doi.org/10.5539/enrr.v2n3p441	taxonIdCalais076_PlotC14/decimalLatitude/-20.40982/decimalLongitude/-43.50149
taxonIdCalais078	PlotCalais14_La20La40982Lo43Lo50149	Itacolomi State Park, Calais, MG, Brazil	BR	present	native	2008-10-21T09:26Z	http://dx.doi.org/10.5539/enrr.v2n3p456	taxonIdCalais078_PlotC14/decimalLatitude/-20.40982/decimalLongitude/-43.50149
taxonIdCalais080	PlotCalais14_La20La40982Lo43Lo50149	Itacolomi State Park, Calais, MG, Brazil	BR	present	native	2008-10-21T09:26Z	http://dx.doi.org/10.5539/enrr.v2n3p461	taxonIdCalais080_PlotC14/decimalLatitude/-20.40982/decimalLongitude/-43.50149
taxonIdCalais081	PlotCalais14_La20La40982Lo43Lo50149	Itacolomi State Park, Calais, MG, Brazil	BR	present	invasive	2008-10-21T09:26Z	http://dx.doi.org/10.5539/enrr.v2n3p474	taxonIdCalais081_PlotC14/decimalLatitude/-20.40982/decimalLongitude/-43.50149
taxonIdCalais082	PlotCalais14_La20La40982Lo43Lo50149	Itacolomi State Park, Calais, MG, Brazil	BR	present	native	2008-10-21T09:26Z	http://dx.doi.org/10.5539/enrr.v2n3p480	taxonIdCalais082_PlotC14/decimalLatitude/-20.40982/decimalLongitude/-43.50149
taxonIdCalais083	PlotCalais14_La20La40982Lo43Lo50149	Itacolomi State Park, Calais, MG, Brazil	BR	present	native	2008-10-21T09:26Z	http://dx.doi.org/10.5539/enrr.v2n3p491	taxonIdCalais083_PlotC14/decimalLatitude/-20.40982/decimalLongitude/-43.50149
taxonIdCalais086	PlotCalais14_La20La40982Lo43Lo50149	Itacolomi State Park, Calais, MG, Brazil	BR	present	native	2008-10-21T09:26Z	http://dx.doi.org/10.5539/enrr.v2n3p503	taxonIdCalais086_PlotC14/decimalLatitude/-20.40982/decimalLongitude/-43.50149
taxonIdCalais090	PlotCalais14_La20La40982Lo43Lo50149	Itacolomi State Park, Calais, MG, Brazil	BR	present	native	2008-10-21T09:26Z	http://dx.doi.org/10.5539/enrr.v2n3p512	taxonIdCalais090_PlotC14/decimalLatitude/-20.40982/decimalLongitude/-43.50149
taxonIdCalais091	PlotCalais14_La20La40982Lo43Lo50149	Itacolomi State Park, Calais, MG, Brazil	BR	present	native	2008-10-21T09:26Z	http://dx.doi.org/10.5539/enrr.v2n3p516	taxonIdCalais091_PlotC14/decimalLatitude/-20.40982/decimalLongitude/-43.50149
taxonIdCalais097	PlotCalais14_La20La40982Lo43Lo50149	Itacolomi State Park, Calais, MG, Brazil	BR	present	native	2008-10-21T09:26Z	http://dx.doi.org/10.5539/enrr.v2n3p543	taxonIdCalais097_PlotC14/decimalLatitude/-20.40982/decimalLongitude/-43.50149
taxonIdCalais100	PlotCalais14_La20La40982Lo43Lo50149	Itacolomi State Park, Calais, MG, Brazil	BR	present	native	2008-10-21T09:26Z	http://dx.doi.org/10.5539/enrr.v2n3p559	taxonIdCalais100_PlotC14/decimalLatitude/-20.40982/decimalLongitude/-43.50149
taxonIdCalais101	PlotCalais14_La20La40982Lo43Lo50149	Itacolomi State Park, Calais, MG, Brazil	BR	present	native	2008-10-21T09:26Z	http://dx.doi.org/10.5539/enrr.v2n3p568	taxonIdCalais101_PlotC14/decimalLatitude/-20.40982/decimalLongitude/-43.50149
taxonIdCalais104	PlotCalais14_La20La40982Lo43Lo50149	Itacolomi State Park, Calais, MG, Brazil	BR	present	native	2008-10-21T09:26Z	http://dx.doi.org/10.5539/enrr.v2n3p578	taxonIdCalais104_PlotC14/decimalLatitude/-20.40982/decimalLongitude/-43.50149
taxonIdCalais107	PlotCalais14_La20La40982Lo43Lo50149	Itacolomi State Park, Calais, MG, Brazil	BR	present	native	2008-10-21T09:26Z	http://dx.doi.org/10.5539/enrr.v2n3p596	taxonIdCalais107_PlotC14/decimalLatitude/-20.40982/decimalLongitude/-43.50149
taxonIdCalais006	PlotCalais15_La20La40964Lo43Lo50138	Itacolomi State Park, Calais, MG, Brazil	BR	present	native	2008-10-21T09:26Z	http://dx.doi.org/10.5539/enrr.v2n3p128	taxonIdCalais006_PlotC15/decimalLatitude/-20.40964/decimalLongitude/-43.50138
taxonIdCalais010	PlotCalais15_La20La40964Lo43Lo50138	Itacolomi State Park, Calais, MG, Brazil	BR	present	native	2008-10-21T09:26Z	http://dx.doi.org/10.5539/enrr.v2n3p156	taxonIdCalais010_PlotC15/decimalLatitude/-20.40964/decimalLongitude/-43.50138
taxonIdCalais011	PlotCalais15_La20La40964Lo43Lo50138	Itacolomi State Park, Calais, MG, Brazil	BR	present	native	2008-10-21T09:26Z	http://dx.doi.org/10.5539/enrr.v2n3p168	taxonIdCalais011_PlotC15/decimalLatitude/-20.40964/decimalLongitude/-43.50138
taxonIdCalais014	PlotCalais15_La20La40964Lo43Lo50138	Itacolomi State Park, Calais, MG, Brazil	BR	present	native	2008-10-21T09:26Z	http://dx.doi.org/10.5539/enrr.v2n3p179	taxonIdCalais014_PlotC15/decimalLatitude/-20.40964/decimalLongitude/-43.50138
taxonIdCalais015	PlotCalais15_La20La40964Lo43Lo50138	Itacolomi State Park, Calais, MG, Brazil	BR	present	native	2008-10-21T09:26Z	http://dx.doi.org/10.5539/enrr.v2n3p187	taxonIdCalais015_PlotC15/decimalLatitude/-20.40964/decimalLongitude/-43.50138
taxonIdCalais020	PlotCalais15_La20La40964Lo43Lo50138	Itacolomi State Park, Calais, MG, Brazil	BR	present	native	2008-10-21T09:26Z	http://dx.doi.org/10.5539/enrr.v2n3p214	taxonIdCalais020_PlotC15/decimalLatitude/-20.40964/decimalLongitude/-43.50138
taxonIdCalais026	PlotCalais15_La20La40964Lo43Lo50138	Itacolomi State Park, Calais, MG, Brazil	BR	present	native	2008-10-21T09:26Z	http://dx.doi.org/10.5539/enrr.v2n3p244	taxonIdCalais026_PlotC15/decimalLatitude/-20.40964/decimalLongitude/-43.50138
taxonIdCalais029	PlotCalais15_La20La40964Lo43Lo50138	Itacolomi State Park, Calais, MG, Brazil	BR	present	native	2008-10-21T09:26Z	http://dx.doi.org/10.5539/enrr.v2n3p251	taxonIdCalais029_PlotC15/decimalLatitude/-20.40964/decimalLongitude/-43.50138
taxonIdCalais041	PlotCalais15_La20La40964Lo43Lo50138	Itacolomi State Park, Calais, MG, Brazil	BR	present	native	2008-10-21T09:26Z	http://dx.doi.org/10.5539/enrr.v2n3p286	taxonIdCalais041_PlotC15/decimalLatitude/-20.40964/decimalLongitude/-43.50138
taxonIdCalais042	PlotCalais15_La20La40964Lo43Lo50138	Itacolomi State Park, Calais, MG, Brazil	BR	present	native	2008-10-21T09:26Z	http://dx.doi.org/10.5539/enrr.v2n3p290	taxonIdCalais042_PlotC15/decimalLatitude/-20.40964/decimalLongitude/-43.50138
taxonIdCalais044	PlotCalais15_La20La40964Lo43Lo50138	Itacolomi State Park, Calais, MG, Brazil	BR	present	native	2008-10-21T09:26Z	http://dx.doi.org/10.5539/enrr.v2n3p300	taxonIdCalais044_PlotC15/decimalLatitude/-20.40964/decimalLongitude/-43.50138
taxonIdCalais051	PlotCalais15_La20La40964Lo43Lo50138	Itacolomi State Park, Calais, MG, Brazil	BR	present	native	2008-10-21T09:26Z	http://dx.doi.org/10.5539/enrr.v2n3p323	taxonIdCalais051_PlotC15/decimalLatitude/-20.40964/decimalLongitude/-43.50138
taxonIdCalais056	PlotCalais15_La20La40964Lo43Lo50138	Itacolomi State Park, Calais, MG, Brazil	BR	present	native	2008-10-21T09:26Z	http://dx.doi.org/10.5539/enrr.v2n3p342	taxonIdCalais056_PlotC15/decimalLatitude/-20.40964/decimalLongitude/-43.50138
taxonIdCalais060	PlotCalais15_La20La40964Lo43Lo50138	Itacolomi State Park, Calais, MG, Brazil	BR	present	native	2008-10-21T09:26Z	http://dx.doi.org/10.5539/enrr.v2n3p352	taxonIdCalais060_PlotC15/decimalLatitude/-20.40964/decimalLongitude/-43.50138
taxonIdCalais064	PlotCalais15_La20La40964Lo43Lo50138	Itacolomi State Park, Calais, MG, Brazil	BR	present	native	2008-10-21T09:26Z	http://dx.doi.org/10.5539/enrr.v2n3p374	taxonIdCalais064_PlotC15/decimalLatitude/-20.40964/decimalLongitude/-43.50138
taxonIdCalais066	PlotCalais15_La20La40964Lo43Lo50138	Itacolomi State Park, Calais, MG, Brazil	BR	present	native	2008-10-21T09:26Z	http://dx.doi.org/10.5539/enrr.v2n3p385	taxonIdCalais066_PlotC15/decimalLatitude/-20.40964/decimalLongitude/-43.50138
taxonIdCalais068	PlotCalais15_La20La40964Lo43Lo50138	Itacolomi State Park, Calais, MG, Brazil	BR	present	native	2008-10-21T09:26Z	http://dx.doi.org/10.5539/enrr.v2n3p401	taxonIdCalais068_PlotC15/decimalLatitude/-20.40964/decimalLongitude/-43.50138
taxonIdCalais070	PlotCalais15_La20La40964Lo43Lo50138	Itacolomi State Park, Calais, MG, Brazil	BR	present	native	2008-10-21T09:26Z	http://dx.doi.org/10.5539/enrr.v2n3p412	taxonIdCalais070_PlotC15/decimalLatitude/-20.40964/decimalLongitude/-43.50138
taxonIdCalais074	PlotCalais15_La20La40964Lo43Lo50138	Itacolomi State Park, Calais, MG, Brazil	BR	present	native	2008-10-21T09:26Z	http://dx.doi.org/10.5539/enrr.v2n3p429	taxonIdCalais074_PlotC15/decimalLatitude/-20.40964/decimalLongitude/-43.50138
taxonIdCalais076	PlotCalais15_La20La40964Lo43Lo50138	Itacolomi State Park, Calais, MG, Brazil	BR	present	native	2008-10-21T09:26Z	http://dx.doi.org/10.5539/enrr.v2n3p442	taxonIdCalais076_PlotC15/decimalLatitude/-20.40964/decimalLongitude/-43.50138
taxonIdCalais078	PlotCalais15_La20La40964Lo43Lo50138	Itacolomi State Park, Calais, MG, Brazil	BR	present	native	2008-10-21T09:26Z	http://dx.doi.org/10.5539/enrr.v2n3p457	taxonIdCalais078_PlotC15/decimalLatitude/-20.40964/decimalLongitude/-43.50138
taxonIdCalais081	PlotCalais15_La20La40964Lo43Lo50138	Itacolomi State Park, Calais, MG, Brazil	BR	present	invasive	2008-10-21T09:26Z	http://dx.doi.org/10.5539/enrr.v2n3p475	taxonIdCalais081_PlotC15/decimalLatitude/-20.40964/decimalLongitude/-43.50138
taxonIdCalais082	PlotCalais15_La20La40964Lo43Lo50138	Itacolomi State Park, Calais, MG, Brazil	BR	present	native	2008-10-21T09:26Z	http://dx.doi.org/10.5539/enrr.v2n3p481	taxonIdCalais082_PlotC15/decimalLatitude/-20.40964/decimalLongitude/-43.50138
taxonIdCalais083	PlotCalais15_La20La40964Lo43Lo50138	Itacolomi State Park, Calais, MG, Brazil	BR	present	native	2008-10-21T09:26Z	http://dx.doi.org/10.5539/enrr.v2n3p492	taxonIdCalais083_PlotC15/decimalLatitude/-20.40964/decimalLongitude/-43.50138
taxonIdCalais091	PlotCalais15_La20La40964Lo43Lo50138	Itacolomi State Park, Calais, MG, Brazil	BR	present	native	2008-10-21T09:26Z	http://dx.doi.org/10.5539/enrr.v2n3p517	taxonIdCalais091_PlotC15/decimalLatitude/-20.40964/decimalLongitude/-43.50138
taxonIdCalais093	PlotCalais15_La20La40964Lo43Lo50138	Itacolomi State Park, Calais, MG, Brazil	BR	present	native	2008-10-21T09:26Z	http://dx.doi.org/10.5539/enrr.v2n3p528	taxonIdCalais093_PlotC15/decimalLatitude/-20.40964/decimalLongitude/-43.50138
taxonIdCalais097	PlotCalais15_La20La40964Lo43Lo50138	Itacolomi State Park, Calais, MG, Brazil	BR	present	native	2008-10-21T09:26Z	http://dx.doi.org/10.5539/enrr.v2n3p544	taxonIdCalais097_PlotC15/decimalLatitude/-20.40964/decimalLongitude/-43.50138
taxonIdCalais101	PlotCalais15_La20La40964Lo43Lo50138	Itacolomi State Park, Calais, MG, Brazil	BR	present	native	2008-10-21T09:26Z	http://dx.doi.org/10.5539/enrr.v2n3p569	taxonIdCalais101_PlotC15/decimalLatitude/-20.40964/decimalLongitude/-43.50138
taxonIdCalais102	PlotCalais15_La20La40964Lo43Lo50138	Itacolomi State Park, Calais, MG, Brazil	BR	present	native	2008-10-21T09:26Z	http://dx.doi.org/10.5539/enrr.v2n3p571	taxonIdCalais102_PlotC15/decimalLatitude/-20.40964/decimalLongitude/-43.50138
taxonIdCalais104	PlotCalais15_La20La40964Lo43Lo50138	Itacolomi State Park, Calais, MG, Brazil	BR	present	native	2008-10-21T09:26Z	http://dx.doi.org/10.5539/enrr.v2n3p579	taxonIdCalais104_PlotC15/decimalLatitude/-20.40964/decimalLongitude/-43.50138
taxonIdCalais106	PlotCalais15_La20La40964Lo43Lo50138	Itacolomi State Park, Calais, MG, Brazil	BR	present	native	2008-10-21T09:26Z	http://dx.doi.org/10.5539/enrr.v2n3p588	taxonIdCalais106_PlotC15/decimalLatitude/-20.40964/decimalLongitude/-43.50138
