# Supplementary material for: Vascular plant community composition from the campos rupestres of the Itacolomi State Park, Brazil
Source: Biodivers Data J. 2015 Feb 27;(3):e4507. doi: 10.3897/BDJ.3.e4507 (PMC4355493; doi:10.3897/BDJ.3.e4507)
Supplement: Supplementary material 2 — Calais [file biodiversity_data_journal-3-e4507-s002.zip › camporupestre-15plot-survey-sampling-itacolomi-calais107-checklist/eml.xml]

<eml:eml xmlns:eml="eml://ecoinformatics.org/eml-2.1.1"
         xmlns:dc="http://purl.org/dc/terms/"
         xmlns:xsi="http://www.w3.org/2001/XMLSchema-instance"
         xsi:schemaLocation="eml://ecoinformatics.org/eml-2.1.1 http://rs.gbif.org/schema/eml-gbif-profile/1.0.2/eml.xsd"
         packageId="98c6646f-c415-4501-9f99-d1404cd54a55/v4" system="http://gbif.org" scope="system"
         xml:lang="eng">

<dataset>
  <alternateIdentifier>98c6646f-c415-4501-9f99-d1404cd54a55</alternateIdentifier>
  <alternateIdentifier>http://187.32.44.123/ipt/archive.do?r=camporupestre-15plot-survey-sampling-itacolomi-calais107-checklist</alternateIdentifier>
  <alternateIdentifier>ba86a7a6-6c36-4dc3-a2a5-0cf7f484c583</alternateIdentifier>
  <alternateIdentifier>http://187.32.44.123/ipt/resource.do?r=camporupestre-15plot-survey-sampling-itacolomi-calais107-checklist</alternateIdentifier>
  <title xml:lang="eng">Composition of two campo rupestre communities from the Itacolomi State Park, Calais (present dataset), (related dataset: Lagoa Seca), MG, Brazil</title>
<creator>
    <individualName>
        <givenName>Markus</givenName>
      <surName>Gastauer</surName>
    </individualName>
    <organizationName>UFV/LEEP</organizationName>
    <address>
        <deliveryPoint>UFV/LEEP</deliveryPoint>
        <city>Vicosa</city>
        <administrativeArea>MG</administrativeArea>
        <postalCode>36570000</postalCode>
    </address>
    <phone>55-31-38991955</phone>
    <electronicMailAddress>mgasti@hotmail.com</electronicMailAddress>
    <onlineUrl>http://lattes.cnpq.br/3843526011662634</onlineUrl>
</creator>
<metadataProvider>
    <individualName>
        <givenName>Werner</givenName>
      <surName>Leyh</surName>
    </individualName>
    <organizationName>UFV/LEEP</organizationName>
    <address>
        <deliveryPoint>UFV/LEEP</deliveryPoint>
        <city>Frutal</city>
        <administrativeArea>MG</administrativeArea>
        <postalCode>38200000</postalCode>
    </address>
    <phone>55-34-34299533</phone>
    <electronicMailAddress>WernerLeyh@yahoo.com</electronicMailAddress>
    <onlineUrl>http://lattes.cnpq.br/3680164374350008</onlineUrl>
</metadataProvider>
    <associatedParty>
    <individualName>
        <givenName>Markus</givenName>
      <surName>Gastauer</surName>
    </individualName>
    <organizationName>UFV/LEEP</organizationName>
    <address>
        <deliveryPoint>UFV/LEEP</deliveryPoint>
        <city>Frutal</city>
        <administrativeArea>MG</administrativeArea>
        <postalCode>38200000</postalCode>
    </address>
    <phone>55-34-34299533</phone>
    <electronicMailAddress>mgasti@hotmail.com</electronicMailAddress>
    <onlineUrl>http://lattes.cnpq.br/3843526011662634</onlineUrl>
    <role></role>
    </associatedParty>
    <associatedParty>
    <organizationName>UFV/LEEP</organizationName>
    <role>distributor</role>
    </associatedParty>
<pubDate>
      	2014-12-27
</pubDate>
<language>eng</language>
<abstract>
  <para>We compared floristic composition, species richness and diversity from two sites, Lagoa Seca and Calais. Both surveys contained 15 plots of 10 x 10 m, cardinality of each species was estimated.</para>
</abstract>
      <keywordSet>
            <keyword>endemic species</keyword>
            <keyword>endangered ecosystems</keyword>
            <keyword>anthropogenic impacts</keyword>
            <keyword>Braun-Blanquet</keyword>
            <keyword>soil properties</keyword>
            <keyword>Espinhaço Mountain Range</keyword>
            <keyword>Wilmanns cover-abundance scale</keyword>
            <keyword>species cardinality
richness</keyword>
        <keywordThesaurus>N/A</keywordThesaurus>
      </keywordSet>
      <keywordSet>
            <keyword>Checklist</keyword>
        <keywordThesaurus>GBIF Dataset Type Vocabulary: http://rs.gbif.org/vocabulary/gbif/dataset_type.xml</keywordThesaurus>
      </keywordSet>
  <additionalInfo>
    <para>ISSN 1927-0488 E-ISSN 1927-0496</para>
  </additionalInfo>
  <intellectualRights>
    <para>This work is licensed under a Creative Commons CCZero 1.0 License http://creativecommons.org/publicdomain/zero/1.0/legalcode.</para>
  </intellectualRights>
  <distribution scope="document">
    <online>
      <url function="information">http://dx.doi.org/10.5539/enrr.v2n3p115</url>
    </online>
  </distribution>
  <coverage>
      <geographicCoverage>
          <geographicDescription>Itacolomi State Park (Park limits: E: 43º24.136&apos;W, S: 20º28.485&apos;S, N: 20º24.385&apos;S, W: 43º31.405&apos;W), Calais (present dataset), (related dataset: Lagoa Seca), MG, Brazil</geographicDescription>
        <boundingCoordinates>
          <westBoundingCoordinate>-43.52</westBoundingCoordinate>
          <eastBoundingCoordinate>-43.4</eastBoundingCoordinate>
          <northBoundingCoordinate>-20.4</northBoundingCoordinate>
          <southBoundingCoordinate>-20.48</southBoundingCoordinate>
        </boundingCoordinates>
      </geographicCoverage>
          <temporalCoverage>
              <rangeOfDates>
                  <beginDate>
                    <calendarDate>2008-10-20</calendarDate>
                  </beginDate>
                <endDate>
                  <calendarDate>2008-10-20</calendarDate>
                </endDate>
              </rangeOfDates>
          </temporalCoverage>
          <temporalCoverage>
              <rangeOfDates>
                  <beginDate>
                    <calendarDate>2008-10-20</calendarDate>
                  </beginDate>
                <endDate>
                  <calendarDate>2009-01-01</calendarDate>
                </endDate>
              </rangeOfDates>
          </temporalCoverage>
          <taxonomicCoverage>
              <generalTaxonomicCoverage>Altogether, we registered occurrences from 167 different taxa from 114 genera and 47 families. Families with most species are Poaceae and Asteraceae, followed by Cyperaceae.</generalTaxonomicCoverage>
              <taxonomicClassification>
                  <taxonRankName>family</taxonRankName>
                <taxonRankValue>Poaceae</taxonRankValue>
              </taxonomicClassification>
              <taxonomicClassification>
                  <taxonRankName>family</taxonRankName>
                <taxonRankValue>Asteraceae</taxonRankValue>
              </taxonomicClassification>
              <taxonomicClassification>
                  <taxonRankName>family</taxonRankName>
                <taxonRankValue>Cyperaceae</taxonRankValue>
              </taxonomicClassification>
          </taxonomicCoverage>
  </coverage>
  <purpose>
    <para>Campos rupestres are rare and endangered ecosystem accommodating a species rich flora with a degree of endemism. Here we make available a dataset from phytosociological surveys carried out in the Itacolomi State Park, Minas Gerais, Southeastern Brazil.</para>
  </purpose>
  <contact>
    <individualName>
        <givenName>João</givenName>
      <surName>Meira Neto</surName>
    </individualName>
    <organizationName>UFV/LEEP</organizationName>
    <address>
        <deliveryPoint>UFV/LEEP</deliveryPoint>
        <city>Vicosa</city>
        <administrativeArea>MG</administrativeArea>
        <postalCode>36570000</postalCode>
    </address>
    <phone>55-31-38991955</phone>
    <electronicMailAddress>j.meira@ufv.br</electronicMailAddress>
    <onlineUrl>http://lattes.cnpq.br/9700813002549585</onlineUrl>
  </contact>
  <methods>
        <methodStep>
          <description>
            <para>We compared floristic composition, species richness and diversity from two sites, Lagoa Seca and Calais. Both surveys contained 15 plots of 10 x 10 m, cardinality of each species was estimated.</para>
          </description>
        </methodStep>
      <sampling>
        <studyExtent>
          <description>
            <para>15 plots of 10 x 10 m</para>
          </description>
        </studyExtent>
        <samplingDescription>
          <para>We compared floristic composition, species richness and diversity from two sites, Lagoa Seca and Calais. Both surveys contained 15 plots of 10 x 10 m, cardinality of each species was estimated.</para>
        </samplingDescription>
      </sampling>
  </methods>
  <project>
      <title>Composition of two campo rupestre communities from the Itacolomi State Park, Brazil</title>
    <personnel>
      <individualName>
          <givenName>João</givenName>
        <surName>Meira Neto</surName>
      </individualName>
      <role>pointOfContact</role>
    </personnel>
    <funding>
      <para>Minas Gerais State</para>
    </funding>
    <studyAreaDescription>
      <descriptor name="generic"
                  citableClassificationSystem="false">
        <descriptorValue></descriptorValue>
      </descriptor>
    </studyAreaDescription>
    <designDescription>
      <description>
          <para>Composition of two campo rupestre  communities from the Itacolomi State Park, (Lagoa Seca and Calais), MG, Brazil  Brazil, 12/16/2012, Gastauer, M.. Leyh, W., Meira-Neto, J., Biodiversity Data Journal. 2014</para>
      </description>
    </designDescription>
  </project>
</dataset>
  <additionalMetadata>
    <metadata>
      <gbif>
          <dateStamp>2014-11-06T01:53:15.000-02:00</dateStamp>
          <hierarchyLevel>dataset</hierarchyLevel>
            <citation identifier="http://dx.doi.org/10.5539/enrr.v2n3p115">Composition of two campo rupestre  communities from the Itacolomi State Park, (Lagoa Seca and Calais), MG, Brazil  Brazil, Gastauer, M.. Leyh, W., Meira-Neto, J., Biodiversity Data Journal. 2014.</citation>
          <bibliography>
                <citation identifier="http://dx.doi.org/10.5539/enrr.v2n3p115">Gastauer, M., Messias, M.C.T.B., Meira Neto, J.A.A.,  Floristic Composition, Species Richness and Diversity of Campo RupestreVegetation from the Itacolomi State Park, Minas Gerais, Brazil. Environment and Natural Resources Research; Vol. 2, No. 3; 2012, ISSN 1927-0488 E-ISSN 1927-0496, http://dx.doi.org/10.5539/enrr.v2n3p115</citation>
          </bibliography>
          <resourceLogoUrl>http://www.leep.ufv.br/Recursos/Paginas/Fotos/media_leep.jpg</resourceLogoUrl>
          <collection>
            <parentCollectionIdentifier>http://187.32.44.123/ipt/</parentCollectionIdentifier>
            <collectionIdentifier>http://187.32.44.123/ipt/resource.do?r=camporupestre-15plot-survey-sampling-itacolomi-calais107-checklist</collectionIdentifier>
            <collectionName>Composition of two campo rupestre communities from the Itacolomi State Park, Calais (present dataset), (related dataset: Lagoa Seca), MG, Brazil</collectionName>
          </collection>
          <specimenPreservationMethod>noTreatment</specimenPreservationMethod>
          <dc:replaces>98c6646f-c415-4501-9f99-d1404cd54a55/v3.xml</dc:replaces>
      </gbif>
    </metadata>
  </additionalMetadata>
</eml:eml>
