# Supplementary material for: Vascular plant community composition from the campos rupestres of the Itacolomi State Park, Brazil
Source: Biodivers Data J. 2015 Feb 27;(3):e4507. doi: 10.3897/BDJ.3.e4507 (PMC4355493; doi:10.3897/BDJ.3.e4507)
Supplement: Supplementary material 2 — Calais [file biodiversity_data_journal-3-e4507-s002.zip › camporupestre-15plot-survey-sampling-itacolomi-calais107-checklist/habit.txt]

id	description
taxonIdCalais001	campo rupestre vegetation
taxonIdCalais002	campo rupestre vegetation
taxonIdCalais003	campo rupestre vegetation
taxonIdCalais004	campo rupestre vegetation
taxonIdCalais005	campo rupestre vegetation
taxonIdCalais006	campo rupestre vegetation
taxonIdCalais007	campo rupestre vegetation
taxonIdCalais008	campo rupestre vegetation
taxonIdCalais009	campo rupestre vegetation
taxonIdCalais010	campo rupestre vegetation
taxonIdCalais011	campo rupestre vegetation
taxonIdCalais012	campo rupestre vegetation
taxonIdCalais013	campo rupestre vegetation
taxonIdCalais014	campo rupestre vegetation
taxonIdCalais015	campo rupestre vegetation
taxonIdCalais016	campo rupestre vegetation
taxonIdCalais017	campo rupestre vegetation
taxonIdCalais018	campo rupestre vegetation
taxonIdCalais019	campo rupestre vegetation
taxonIdCalais020	campo rupestre vegetation
taxonIdCalais021	campo rupestre vegetation
taxonIdCalais022	campo rupestre vegetation
taxonIdCalais023	campo rupestre vegetation
taxonIdCalais024	campo rupestre vegetation
taxonIdCalais025	campo rupestre vegetation
taxonIdCalais026	campo rupestre vegetation
taxonIdCalais027	campo rupestre vegetation
taxonIdCalais028	campo rupestre vegetation
taxonIdCalais029	campo rupestre vegetation
taxonIdCalais030	campo rupestre vegetation
taxonIdCalais031	campo rupestre vegetation
taxonIdCalais032	campo rupestre vegetation
taxonIdCalais033	campo rupestre vegetation
taxonIdCalais034	campo rupestre vegetation
taxonIdCalais035	campo rupestre vegetation
taxonIdCalais036	campo rupestre vegetation
taxonIdCalais037	campo rupestre vegetation
taxonIdCalais038	campo rupestre vegetation
taxonIdCalais039	campo rupestre vegetation
taxonIdCalais040	campo rupestre vegetation
taxonIdCalais041	campo rupestre vegetation
taxonIdCalais042	campo rupestre vegetation
taxonIdCalais043	campo rupestre vegetation
taxonIdCalais044	campo rupestre vegetation
taxonIdCalais045	campo rupestre vegetation
taxonIdCalais046	campo rupestre vegetation
taxonIdCalais047	campo rupestre vegetation
taxonIdCalais048	campo rupestre vegetation
taxonIdCalais049	campo rupestre vegetation
taxonIdCalais050	campo rupestre vegetation
taxonIdCalais051	campo rupestre vegetation
taxonIdCalais052	campo rupestre vegetation
taxonIdCalais053	campo rupestre vegetation
taxonIdCalais054	campo rupestre vegetation
taxonIdCalais055	campo rupestre vegetation
taxonIdCalais056	campo rupestre vegetation
taxonIdCalais057	campo rupestre vegetation
taxonIdCalais058	campo rupestre vegetation
taxonIdCalais059	campo rupestre vegetation
taxonIdCalais060	campo rupestre vegetation
taxonIdCalais061	campo rupestre vegetation
taxonIdCalais062	campo rupestre vegetation
taxonIdCalais063	campo rupestre vegetation
taxonIdCalais064	campo rupestre vegetation
taxonIdCalais065	campo rupestre vegetation
taxonIdCalais066	campo rupestre vegetation
taxonIdCalais067	campo rupestre vegetation
taxonIdCalais068	campo rupestre vegetation
taxonIdCalais069	campo rupestre vegetation
taxonIdCalais070	campo rupestre vegetation
taxonIdCalais071	campo rupestre vegetation
taxonIdCalais072	campo rupestre vegetation
taxonIdCalais073	campo rupestre vegetation
taxonIdCalais074	campo rupestre vegetation
taxonIdCalais075	campo rupestre vegetation
taxonIdCalais076	campo rupestre vegetation
taxonIdCalais077	campo rupestre vegetation
taxonIdCalais078	campo rupestre vegetation
taxonIdCalais079	campo rupestre vegetation
taxonIdCalais080	campo rupestre vegetation
taxonIdCalais081	campo rupestre vegetation
taxonIdCalais082	campo rupestre vegetation
taxonIdCalais083	campo rupestre vegetation
taxonIdCalais084	campo rupestre vegetation
taxonIdCalais085	campo rupestre vegetation
taxonIdCalais086	campo rupestre vegetation
taxonIdCalais087	campo rupestre vegetation
taxonIdCalais088	campo rupestre vegetation
taxonIdCalais089	campo rupestre vegetation
taxonIdCalais090	campo rupestre vegetation
taxonIdCalais091	campo rupestre vegetation
taxonIdCalais092	campo rupestre vegetation
taxonIdCalais093	campo rupestre vegetation
taxonIdCalais094	campo rupestre vegetation
taxonIdCalais095	campo rupestre vegetation
taxonIdCalais096	campo rupestre vegetation
taxonIdCalais097	campo rupestre vegetation
taxonIdCalais098	campo rupestre vegetation
taxonIdCalais099	campo rupestre vegetation
taxonIdCalais100	campo rupestre vegetation
taxonIdCalais101	campo rupestre vegetation
taxonIdCalais102	campo rupestre vegetation
taxonIdCalais103	campo rupestre vegetation
taxonIdCalais104	campo rupestre vegetation
taxonIdCalais105	campo rupestre vegetation
taxonIdCalais106	campo rupestre vegetation
taxonIdCalais107	campo rupestre vegetation
