# Supplementary material for: Vascular plant community composition from the campos rupestres of the Itacolomi State Park, Brazil
Source: Biodivers Data J. 2015 Feb 27;(3):e4507. doi: 10.3897/BDJ.3.e4507 (PMC4355493; doi:10.3897/BDJ.3.e4507)
Supplement: Supplementary material 2 — Calais [file biodiversity_data_journal-3-e4507-s002.zip › camporupestre-15plot-survey-sampling-itacolomi-calais107-checklist/measurementorfactsoil.txt]

id	measurementType	measurementValue	measurementUnit	measurementDeterminedDate	measurementMethod	measurementRemarks
taxonIdCalais007	Coarse sand content	39	Percentage	2008-10-21T09:26Z	sieving	PlotCalais01_/_Coarse sand content - Percentage - sieving - Coarse sand content
taxonIdCalais007	Fine sand content	34	Percentage	2008-10-21T09:26Z	sieving	PlotCalais01_/_Fine sand content - Percentage - sieving - Fine sand content
taxonIdCalais007	Silt content	15	Percentage	2008-10-21T09:26Z	sieving	PlotCalais01_/_Silt content - Percentage - sieving - Silt content
taxonIdCalais007	Clay content	12	Percentage	2008-10-21T09:26Z	sieving	PlotCalais01_/_Clay content - Percentage - sieving - Clay content
taxonIdCalais007	Soil acidity (pH)	5.12	nondimensional	2008-10-21T09:26Z	pH in water	PlotCalais01_/_Soil acidity (pH) - nondimensional - pH in water - Soil acidity (pH)
taxonIdCalais007	Availability of phosphorus	1.4	mg/dm3	2008-10-21T09:26Z	Extrator Mehlich 1	PlotCalais01_/_Availability of phosphorus - mg/dm3 - Extrator Mehlich 1 - Availability of phosphorus
taxonIdCalais007	Potassium availability	30	mg/dm3	2008-10-21T09:26Z	Extrator Mehlich 1	PlotCalais01_/_Potassium availability - mg/dm3 - Extrator Mehlich 1 - Potassium availability
taxonIdCalais007	Calcium availability	0.36	cmolc/dm3	2008-10-21T09:26Z	Extractor KCl 1mol/L	PlotCalais01_/_Calcium availability - cmolc/dm3 - Extractor KCl 1mol/L - Calcium availability
taxonIdCalais007	Magnesium availability	0.09	cmolc/dm3	2008-10-21T09:26Z	Extractor KCl 1mol/L	PlotCalais01_/_Magnesium availability - cmolc/dm3 - Extractor KCl 1mol/L - Magnesium availability
taxonIdCalais007	Aluminium avalaibility	1.18	cmolc/dm3	2008-10-21T09:26Z	Extractor KCl 1mol/L	PlotCalais01_/_Aluminium avalaibility - cmolc/dm3 - Extractor KCl 1mol/L - Aluminium avalaibility
taxonIdCalais007	Potential Acidity (H+AL)	4.6	cmolc/dm3	2008-10-21T09:26Z	Extractor Ca(CH3COO)2, 0.5mol/L, pH 7.0	PlotCalais01_/_Potential acidity (H+Al) - cmolc/dm3 - Extractor Ca(CH3COO)2, 0.5mol/L, pH 7.0 - Potential acidity (H+Al)
taxonIdCalais007	Interchangeable Bases	0.53	cmolc/dm3	2008-10-21T09:26Z	Interchangeable bases	PlotCalais01_/_Interchangeable bases - cmolc/dm3 - Interchangeable bases - Sum of Interchangeable bases
taxonIdCalais007	Effective cation exchange capacity	1.71	cmolc/dm3	2008-10-21T09:26Z	Effective cation exchange capacity	PlotCalais01_/_Effective cation exchange capacity - cmolc/dm3 - Effective cation exchange capacity - Effective cation exchange capacity
taxonIdCalais007	Cation exchange capacity at pH 7.0	5.13	cmolc/dm3	2008-10-21T09:26Z	Cation exchange capacity at pH 7.0	PlotCalais01_/_Cation exchange capacity at pH 7.0 - cmolc/dm3 - Cation exchange capacity at pH 7.0 - Cation exchange capacity at pH 7.0
taxonIdCalais007	Saturation of bases	10.3	Percentage	2008-10-21T09:26Z	Saturation of bases	PlotCalais01_/_Saturation of bases - Percentage - Saturation of bases - Saturation of bases
taxonIdCalais007	Saturation of aluminium	69	Percentage	2008-10-21T09:26Z	Saturation of aluminium	PlotCalais01_/_Saturation of aluminium - Percentage - Saturation of aluminium - Saturation of aluminium
taxonIdCalais007	Remaining phosphorus	37.8	mg/L	2008-10-21T09:26Z	Extraction with 0.01 mol/L CaCl2	PlotCalais01_/_Remaining phosphorus - mg/L - Remaining phosphorus - Remaining phosphorus
taxonIdCalais007	Rocky outcrops	10	Percentage	2008-10-21T09:26Z	Estimation	PlotCalais01_/_Rocky outcrops - Percentage - Estimation - Rocky outcrops
taxonIdCalais007	Inclination	3	Percentage	2008-10-21T09:26Z	Estimation	PlotCalais01_/_Inclination - Percentage - Estimation - Inclination
taxonIdCalais008	Coarse sand content	39	Percentage	2008-10-21T09:26Z	sieving	PlotCalais01_/_Coarse sand content - Percentage - sieving - Coarse sand content
taxonIdCalais008	Fine sand content	34	Percentage	2008-10-21T09:26Z	sieving	PlotCalais01_/_Fine sand content - Percentage - sieving - Fine sand content
taxonIdCalais008	Silt content	15	Percentage	2008-10-21T09:26Z	sieving	PlotCalais01_/_Silt content - Percentage - sieving - Silt content
taxonIdCalais008	Clay content	12	Percentage	2008-10-21T09:26Z	sieving	PlotCalais01_/_Clay content - Percentage - sieving - Clay content
taxonIdCalais008	Soil acidity (pH)	5.12	nondimensional	2008-10-21T09:26Z	pH in water	PlotCalais01_/_Soil acidity (pH) - nondimensional - pH in water - Soil acidity (pH)
taxonIdCalais008	Availability of phosphorus	1.4	mg/dm3	2008-10-21T09:26Z	Extrator Mehlich 1	PlotCalais01_/_Availability of phosphorus - mg/dm3 - Extrator Mehlich 1 - Availability of phosphorus
taxonIdCalais008	Potassium availability	30	mg/dm3	2008-10-21T09:26Z	Extrator Mehlich 1	PlotCalais01_/_Potassium availability - mg/dm3 - Extrator Mehlich 1 - Potassium availability
taxonIdCalais008	Calcium availability	0.36	cmolc/dm3	2008-10-21T09:26Z	Extractor KCl 1mol/L	PlotCalais01_/_Calcium availability - cmolc/dm3 - Extractor KCl 1mol/L - Calcium availability
taxonIdCalais008	Magnesium availability	0.09	cmolc/dm3	2008-10-21T09:26Z	Extractor KCl 1mol/L	PlotCalais01_/_Magnesium availability - cmolc/dm3 - Extractor KCl 1mol/L - Magnesium availability
taxonIdCalais008	Aluminium avalaibility	1.18	cmolc/dm3	2008-10-21T09:26Z	Extractor KCl 1mol/L	PlotCalais01_/_Aluminium avalaibility - cmolc/dm3 - Extractor KCl 1mol/L - Aluminium avalaibility
taxonIdCalais008	Potential Acidity (H+AL)	4.6	cmolc/dm3	2008-10-21T09:26Z	Extractor Ca(CH3COO)2, 0.5mol/L, pH 7.0	PlotCalais01_/_Potential acidity (H+Al) - cmolc/dm3 - Extractor Ca(CH3COO)2, 0.5mol/L, pH 7.0 - Potential acidity (H+Al)
taxonIdCalais008	Interchangeable Bases	0.53	cmolc/dm3	2008-10-21T09:26Z	Interchangeable bases	PlotCalais01_/_Interchangeable bases - cmolc/dm3 - Interchangeable bases - Sum of Interchangeable bases
taxonIdCalais008	Effective cation exchange capacity	1.71	cmolc/dm3	2008-10-21T09:26Z	Effective cation exchange capacity	PlotCalais01_/_Effective cation exchange capacity - cmolc/dm3 - Effective cation exchange capacity - Effective cation exchange capacity
taxonIdCalais008	Cation exchange capacity at pH 7.0	5.13	cmolc/dm3	2008-10-21T09:26Z	Cation exchange capacity at pH 7.0	PlotCalais01_/_Cation exchange capacity at pH 7.0 - cmolc/dm3 - Cation exchange capacity at pH 7.0 - Cation exchange capacity at pH 7.0
taxonIdCalais008	Saturation of bases	10.3	Percentage	2008-10-21T09:26Z	Saturation of bases	PlotCalais01_/_Saturation of bases - Percentage - Saturation of bases - Saturation of bases
taxonIdCalais008	Saturation of aluminium	69	Percentage	2008-10-21T09:26Z	Saturation of aluminium	PlotCalais01_/_Saturation of aluminium - Percentage - Saturation of aluminium - Saturation of aluminium
taxonIdCalais008	Remaining phosphorus	37.8	mg/L	2008-10-21T09:26Z	Extraction with 0.01 mol/L CaCl2	PlotCalais01_/_Remaining phosphorus - mg/L - Remaining phosphorus - Remaining phosphorus
taxonIdCalais008	Rocky outcrops	10	Percentage	2008-10-21T09:26Z	Estimation	PlotCalais01_/_Rocky outcrops - Percentage - Estimation - Rocky outcrops
taxonIdCalais008	Inclination	3	Percentage	2008-10-21T09:26Z	Estimation	PlotCalais01_/_Inclination - Percentage - Estimation - Inclination
taxonIdCalais011	Coarse sand content	39	Percentage	2008-10-21T09:26Z	sieving	PlotCalais01_/_Coarse sand content - Percentage - sieving - Coarse sand content
taxonIdCalais011	Fine sand content	34	Percentage	2008-10-21T09:26Z	sieving	PlotCalais01_/_Fine sand content - Percentage - sieving - Fine sand content
taxonIdCalais011	Silt content	15	Percentage	2008-10-21T09:26Z	sieving	PlotCalais01_/_Silt content - Percentage - sieving - Silt content
taxonIdCalais011	Clay content	12	Percentage	2008-10-21T09:26Z	sieving	PlotCalais01_/_Clay content - Percentage - sieving - Clay content
taxonIdCalais011	Soil acidity (pH)	5.12	nondimensional	2008-10-21T09:26Z	pH in water	PlotCalais01_/_Soil acidity (pH) - nondimensional - pH in water - Soil acidity (pH)
taxonIdCalais011	Availability of phosphorus	1.4	mg/dm3	2008-10-21T09:26Z	Extrator Mehlich 1	PlotCalais01_/_Availability of phosphorus - mg/dm3 - Extrator Mehlich 1 - Availability of phosphorus
taxonIdCalais011	Potassium availability	30	mg/dm3	2008-10-21T09:26Z	Extrator Mehlich 1	PlotCalais01_/_Potassium availability - mg/dm3 - Extrator Mehlich 1 - Potassium availability
taxonIdCalais011	Calcium availability	0.36	cmolc/dm3	2008-10-21T09:26Z	Extractor KCl 1mol/L	PlotCalais01_/_Calcium availability - cmolc/dm3 - Extractor KCl 1mol/L - Calcium availability
taxonIdCalais011	Magnesium availability	0.09	cmolc/dm3	2008-10-21T09:26Z	Extractor KCl 1mol/L	PlotCalais01_/_Magnesium availability - cmolc/dm3 - Extractor KCl 1mol/L - Magnesium availability
taxonIdCalais011	Aluminium avalaibility	1.18	cmolc/dm3	2008-10-21T09:26Z	Extractor KCl 1mol/L	PlotCalais01_/_Aluminium avalaibility - cmolc/dm3 - Extractor KCl 1mol/L - Aluminium avalaibility
taxonIdCalais011	Potential Acidity (H+AL)	4.6	cmolc/dm3	2008-10-21T09:26Z	Extractor Ca(CH3COO)2, 0.5mol/L, pH 7.0	PlotCalais01_/_Potential acidity (H+Al) - cmolc/dm3 - Extractor Ca(CH3COO)2, 0.5mol/L, pH 7.0 - Potential acidity (H+Al)
taxonIdCalais011	Interchangeable Bases	0.53	cmolc/dm3	2008-10-21T09:26Z	Interchangeable bases	PlotCalais01_/_Interchangeable bases - cmolc/dm3 - Interchangeable bases - Sum of Interchangeable bases
taxonIdCalais011	Effective cation exchange capacity	1.71	cmolc/dm3	2008-10-21T09:26Z	Effective cation exchange capacity	PlotCalais01_/_Effective cation exchange capacity - cmolc/dm3 - Effective cation exchange capacity - Effective cation exchange capacity
taxonIdCalais011	Cation exchange capacity at pH 7.0	5.13	cmolc/dm3	2008-10-21T09:26Z	Cation exchange capacity at pH 7.0	PlotCalais01_/_Cation exchange capacity at pH 7.0 - cmolc/dm3 - Cation exchange capacity at pH 7.0 - Cation exchange capacity at pH 7.0
taxonIdCalais011	Saturation of bases	10.3	Percentage	2008-10-21T09:26Z	Saturation of bases	PlotCalais01_/_Saturation of bases - Percentage - Saturation of bases - Saturation of bases
taxonIdCalais011	Saturation of aluminium	69	Percentage	2008-10-21T09:26Z	Saturation of aluminium	PlotCalais01_/_Saturation of aluminium - Percentage - Saturation of aluminium - Saturation of aluminium
taxonIdCalais011	Remaining phosphorus	37.8	mg/L	2008-10-21T09:26Z	Extraction with 0.01 mol/L CaCl2	PlotCalais01_/_Remaining phosphorus - mg/L - Remaining phosphorus - Remaining phosphorus
taxonIdCalais011	Rocky outcrops	10	Percentage	2008-10-21T09:26Z	Estimation	PlotCalais01_/_Rocky outcrops - Percentage - Estimation - Rocky outcrops
taxonIdCalais011	Inclination	3	Percentage	2008-10-21T09:26Z	Estimation	PlotCalais01_/_Inclination - Percentage - Estimation - Inclination
taxonIdCalais014	Coarse sand content	39	Percentage	2008-10-21T09:26Z	sieving	PlotCalais01_/_Coarse sand content - Percentage - sieving - Coarse sand content
taxonIdCalais014	Fine sand content	34	Percentage	2008-10-21T09:26Z	sieving	PlotCalais01_/_Fine sand content - Percentage - sieving - Fine sand content
taxonIdCalais014	Silt content	15	Percentage	2008-10-21T09:26Z	sieving	PlotCalais01_/_Silt content - Percentage - sieving - Silt content
taxonIdCalais014	Clay content	12	Percentage	2008-10-21T09:26Z	sieving	PlotCalais01_/_Clay content - Percentage - sieving - Clay content
taxonIdCalais014	Soil acidity (pH)	5.12	nondimensional	2008-10-21T09:26Z	pH in water	PlotCalais01_/_Soil acidity (pH) - nondimensional - pH in water - Soil acidity (pH)
taxonIdCalais014	Availability of phosphorus	1.4	mg/dm3	2008-10-21T09:26Z	Extrator Mehlich 1	PlotCalais01_/_Availability of phosphorus - mg/dm3 - Extrator Mehlich 1 - Availability of phosphorus
taxonIdCalais014	Potassium availability	30	mg/dm3	2008-10-21T09:26Z	Extrator Mehlich 1	PlotCalais01_/_Potassium availability - mg/dm3 - Extrator Mehlich 1 - Potassium availability
taxonIdCalais014	Calcium availability	0.36	cmolc/dm3	2008-10-21T09:26Z	Extractor KCl 1mol/L	PlotCalais01_/_Calcium availability - cmolc/dm3 - Extractor KCl 1mol/L - Calcium availability
taxonIdCalais014	Magnesium availability	0.09	cmolc/dm3	2008-10-21T09:26Z	Extractor KCl 1mol/L	PlotCalais01_/_Magnesium availability - cmolc/dm3 - Extractor KCl 1mol/L - Magnesium availability
taxonIdCalais014	Aluminium avalaibility	1.18	cmolc/dm3	2008-10-21T09:26Z	Extractor KCl 1mol/L	PlotCalais01_/_Aluminium avalaibility - cmolc/dm3 - Extractor KCl 1mol/L - Aluminium avalaibility
taxonIdCalais014	Potential Acidity (H+AL)	4.6	cmolc/dm3	2008-10-21T09:26Z	Extractor Ca(CH3COO)2, 0.5mol/L, pH 7.0	PlotCalais01_/_Potential acidity (H+Al) - cmolc/dm3 - Extractor Ca(CH3COO)2, 0.5mol/L, pH 7.0 - Potential acidity (H+Al)
taxonIdCalais014	Interchangeable Bases	0.53	cmolc/dm3	2008-10-21T09:26Z	Interchangeable bases	PlotCalais01_/_Interchangeable bases - cmolc/dm3 - Interchangeable bases - Sum of Interchangeable bases
taxonIdCalais014	Effective cation exchange capacity	1.71	cmolc/dm3	2008-10-21T09:26Z	Effective cation exchange capacity	PlotCalais01_/_Effective cation exchange capacity - cmolc/dm3 - Effective cation exchange capacity - Effective cation exchange capacity
taxonIdCalais014	Cation exchange capacity at pH 7.0	5.13	cmolc/dm3	2008-10-21T09:26Z	Cation exchange capacity at pH 7.0	PlotCalais01_/_Cation exchange capacity at pH 7.0 - cmolc/dm3 - Cation exchange capacity at pH 7.0 - Cation exchange capacity at pH 7.0
taxonIdCalais014	Saturation of bases	10.3	Percentage	2008-10-21T09:26Z	Saturation of bases	PlotCalais01_/_Saturation of bases - Percentage - Saturation of bases - Saturation of bases
taxonIdCalais014	Saturation of aluminium	69	Percentage	2008-10-21T09:26Z	Saturation of aluminium	PlotCalais01_/_Saturation of aluminium - Percentage - Saturation of aluminium - Saturation of aluminium
taxonIdCalais014	Remaining phosphorus	37.8	mg/L	2008-10-21T09:26Z	Extraction with 0.01 mol/L CaCl2	PlotCalais01_/_Remaining phosphorus - mg/L - Remaining phosphorus - Remaining phosphorus
taxonIdCalais014	Rocky outcrops	10	Percentage	2008-10-21T09:26Z	Estimation	PlotCalais01_/_Rocky outcrops - Percentage - Estimation - Rocky outcrops
taxonIdCalais014	Inclination	3	Percentage	2008-10-21T09:26Z	Estimation	PlotCalais01_/_Inclination - Percentage - Estimation - Inclination
taxonIdCalais015	Coarse sand content	39	Percentage	2008-10-21T09:26Z	sieving	PlotCalais01_/_Coarse sand content - Percentage - sieving - Coarse sand content
taxonIdCalais015	Fine sand content	34	Percentage	2008-10-21T09:26Z	sieving	PlotCalais01_/_Fine sand content - Percentage - sieving - Fine sand content
taxonIdCalais015	Silt content	15	Percentage	2008-10-21T09:26Z	sieving	PlotCalais01_/_Silt content - Percentage - sieving - Silt content
taxonIdCalais015	Clay content	12	Percentage	2008-10-21T09:26Z	sieving	PlotCalais01_/_Clay content - Percentage - sieving - Clay content
taxonIdCalais015	Soil acidity (pH)	5.12	nondimensional	2008-10-21T09:26Z	pH in water	PlotCalais01_/_Soil acidity (pH) - nondimensional - pH in water - Soil acidity (pH)
taxonIdCalais015	Availability of phosphorus	1.4	mg/dm3	2008-10-21T09:26Z	Extrator Mehlich 1	PlotCalais01_/_Availability of phosphorus - mg/dm3 - Extrator Mehlich 1 - Availability of phosphorus
taxonIdCalais015	Potassium availability	30	mg/dm3	2008-10-21T09:26Z	Extrator Mehlich 1	PlotCalais01_/_Potassium availability - mg/dm3 - Extrator Mehlich 1 - Potassium availability
taxonIdCalais015	Calcium availability	0.36	cmolc/dm3	2008-10-21T09:26Z	Extractor KCl 1mol/L	PlotCalais01_/_Calcium availability - cmolc/dm3 - Extractor KCl 1mol/L - Calcium availability
taxonIdCalais015	Magnesium availability	0.09	cmolc/dm3	2008-10-21T09:26Z	Extractor KCl 1mol/L	PlotCalais01_/_Magnesium availability - cmolc/dm3 - Extractor KCl 1mol/L - Magnesium availability
taxonIdCalais015	Aluminium avalaibility	1.18	cmolc/dm3	2008-10-21T09:26Z	Extractor KCl 1mol/L	PlotCalais01_/_Aluminium avalaibility - cmolc/dm3 - Extractor KCl 1mol/L - Aluminium avalaibility
taxonIdCalais015	Potential Acidity (H+AL)	4.6	cmolc/dm3	2008-10-21T09:26Z	Extractor Ca(CH3COO)2, 0.5mol/L, pH 7.0	PlotCalais01_/_Potential acidity (H+Al) - cmolc/dm3 - Extractor Ca(CH3COO)2, 0.5mol/L, pH 7.0 - Potential acidity (H+Al)
taxonIdCalais015	Interchangeable Bases	0.53	cmolc/dm3	2008-10-21T09:26Z	Interchangeable bases	PlotCalais01_/_Interchangeable bases - cmolc/dm3 - Interchangeable bases - Sum of Interchangeable bases
taxonIdCalais015	Effective cation exchange capacity	1.71	cmolc/dm3	2008-10-21T09:26Z	Effective cation exchange capacity	PlotCalais01_/_Effective cation exchange capacity - cmolc/dm3 - Effective cation exchange capacity - Effective cation exchange capacity
taxonIdCalais015	Cation exchange capacity at pH 7.0	5.13	cmolc/dm3	2008-10-21T09:26Z	Cation exchange capacity at pH 7.0	PlotCalais01_/_Cation exchange capacity at pH 7.0 - cmolc/dm3 - Cation exchange capacity at pH 7.0 - Cation exchange capacity at pH 7.0
taxonIdCalais015	Saturation of bases	10.3	Percentage	2008-10-21T09:26Z	Saturation of bases	PlotCalais01_/_Saturation of bases - Percentage - Saturation of bases - Saturation of bases
taxonIdCalais015	Saturation of aluminium	69	Percentage	2008-10-21T09:26Z	Saturation of aluminium	PlotCalais01_/_Saturation of aluminium - Percentage - Saturation of aluminium - Saturation of aluminium
taxonIdCalais015	Remaining phosphorus	37.8	mg/L	2008-10-21T09:26Z	Extraction with 0.01 mol/L CaCl2	PlotCalais01_/_Remaining phosphorus - mg/L - Remaining phosphorus - Remaining phosphorus
taxonIdCalais015	Rocky outcrops	10	Percentage	2008-10-21T09:26Z	Estimation	PlotCalais01_/_Rocky outcrops - Percentage - Estimation - Rocky outcrops
taxonIdCalais015	Inclination	3	Percentage	2008-10-21T09:26Z	Estimation	PlotCalais01_/_Inclination - Percentage - Estimation - Inclination
taxonIdCalais016	Coarse sand content	39	Percentage	2008-10-21T09:26Z	sieving	PlotCalais01_/_Coarse sand content - Percentage - sieving - Coarse sand content
taxonIdCalais016	Fine sand content	34	Percentage	2008-10-21T09:26Z	sieving	PlotCalais01_/_Fine sand content - Percentage - sieving - Fine sand content
taxonIdCalais016	Silt content	15	Percentage	2008-10-21T09:26Z	sieving	PlotCalais01_/_Silt content - Percentage - sieving - Silt content
taxonIdCalais016	Clay content	12	Percentage	2008-10-21T09:26Z	sieving	PlotCalais01_/_Clay content - Percentage - sieving - Clay content
taxonIdCalais016	Soil acidity (pH)	5.12	nondimensional	2008-10-21T09:26Z	pH in water	PlotCalais01_/_Soil acidity (pH) - nondimensional - pH in water - Soil acidity (pH)
taxonIdCalais016	Availability of phosphorus	1.4	mg/dm3	2008-10-21T09:26Z	Extrator Mehlich 1	PlotCalais01_/_Availability of phosphorus - mg/dm3 - Extrator Mehlich 1 - Availability of phosphorus
taxonIdCalais016	Potassium availability	30	mg/dm3	2008-10-21T09:26Z	Extrator Mehlich 1	PlotCalais01_/_Potassium availability - mg/dm3 - Extrator Mehlich 1 - Potassium availability
taxonIdCalais016	Calcium availability	0.36	cmolc/dm3	2008-10-21T09:26Z	Extractor KCl 1mol/L	PlotCalais01_/_Calcium availability - cmolc/dm3 - Extractor KCl 1mol/L - Calcium availability
taxonIdCalais016	Magnesium availability	0.09	cmolc/dm3	2008-10-21T09:26Z	Extractor KCl 1mol/L	PlotCalais01_/_Magnesium availability - cmolc/dm3 - Extractor KCl 1mol/L - Magnesium availability
taxonIdCalais016	Aluminium avalaibility	1.18	cmolc/dm3	2008-10-21T09:26Z	Extractor KCl 1mol/L	PlotCalais01_/_Aluminium avalaibility - cmolc/dm3 - Extractor KCl 1mol/L - Aluminium avalaibility
taxonIdCalais016	Potential Acidity (H+AL)	4.6	cmolc/dm3	2008-10-21T09:26Z	Extractor Ca(CH3COO)2, 0.5mol/L, pH 7.0	PlotCalais01_/_Potential acidity (H+Al) - cmolc/dm3 - Extractor Ca(CH3COO)2, 0.5mol/L, pH 7.0 - Potential acidity (H+Al)
taxonIdCalais016	Interchangeable Bases	0.53	cmolc/dm3	2008-10-21T09:26Z	Interchangeable bases	PlotCalais01_/_Interchangeable bases - cmolc/dm3 - Interchangeable bases - Sum of Interchangeable bases
taxonIdCalais016	Effective cation exchange capacity	1.71	cmolc/dm3	2008-10-21T09:26Z	Effective cation exchange capacity	PlotCalais01_/_Effective cation exchange capacity - cmolc/dm3 - Effective cation exchange capacity - Effective cation exchange capacity
taxonIdCalais016	Cation exchange capacity at pH 7.0	5.13	cmolc/dm3	2008-10-21T09:26Z	Cation exchange capacity at pH 7.0	PlotCalais01_/_Cation exchange capacity at pH 7.0 - cmolc/dm3 - Cation exchange capacity at pH 7.0 - Cation exchange capacity at pH 7.0
taxonIdCalais016	Saturation of bases	10.3	Percentage	2008-10-21T09:26Z	Saturation of bases	PlotCalais01_/_Saturation of bases - Percentage - Saturation of bases - Saturation of bases
taxonIdCalais016	Saturation of aluminium	69	Percentage	2008-10-21T09:26Z	Saturation of aluminium	PlotCalais01_/_Saturation of aluminium - Percentage - Saturation of aluminium - Saturation of aluminium
taxonIdCalais016	Remaining phosphorus	37.8	mg/L	2008-10-21T09:26Z	Extraction with 0.01 mol/L CaCl2	PlotCalais01_/_Remaining phosphorus - mg/L - Remaining phosphorus - Remaining phosphorus
taxonIdCalais016	Rocky outcrops	10	Percentage	2008-10-21T09:26Z	Estimation	PlotCalais01_/_Rocky outcrops - Percentage - Estimation - Rocky outcrops
taxonIdCalais016	Inclination	3	Percentage	2008-10-21T09:26Z	Estimation	PlotCalais01_/_Inclination - Percentage - Estimation - Inclination
taxonIdCalais020	Coarse sand content	39	Percentage	2008-10-21T09:26Z	sieving	PlotCalais01_/_Coarse sand content - Percentage - sieving - Coarse sand content
taxonIdCalais020	Fine sand content	34	Percentage	2008-10-21T09:26Z	sieving	PlotCalais01_/_Fine sand content - Percentage - sieving - Fine sand content
taxonIdCalais020	Silt content	15	Percentage	2008-10-21T09:26Z	sieving	PlotCalais01_/_Silt content - Percentage - sieving - Silt content
taxonIdCalais020	Clay content	12	Percentage	2008-10-21T09:26Z	sieving	PlotCalais01_/_Clay content - Percentage - sieving - Clay content
taxonIdCalais020	Soil acidity (pH)	5.12	nondimensional	2008-10-21T09:26Z	pH in water	PlotCalais01_/_Soil acidity (pH) - nondimensional - pH in water - Soil acidity (pH)
taxonIdCalais020	Availability of phosphorus	1.4	mg/dm3	2008-10-21T09:26Z	Extrator Mehlich 1	PlotCalais01_/_Availability of phosphorus - mg/dm3 - Extrator Mehlich 1 - Availability of phosphorus
taxonIdCalais020	Potassium availability	30	mg/dm3	2008-10-21T09:26Z	Extrator Mehlich 1	PlotCalais01_/_Potassium availability - mg/dm3 - Extrator Mehlich 1 - Potassium availability
taxonIdCalais020	Calcium availability	0.36	cmolc/dm3	2008-10-21T09:26Z	Extractor KCl 1mol/L	PlotCalais01_/_Calcium availability - cmolc/dm3 - Extractor KCl 1mol/L - Calcium availability
taxonIdCalais020	Magnesium availability	0.09	cmolc/dm3	2008-10-21T09:26Z	Extractor KCl 1mol/L	PlotCalais01_/_Magnesium availability - cmolc/dm3 - Extractor KCl 1mol/L - Magnesium availability
taxonIdCalais020	Aluminium avalaibility	1.18	cmolc/dm3	2008-10-21T09:26Z	Extractor KCl 1mol/L	PlotCalais01_/_Aluminium avalaibility - cmolc/dm3 - Extractor KCl 1mol/L - Aluminium avalaibility
taxonIdCalais020	Potential Acidity (H+AL)	4.6	cmolc/dm3	2008-10-21T09:26Z	Extractor Ca(CH3COO)2, 0.5mol/L, pH 7.0	PlotCalais01_/_Potential acidity (H+Al) - cmolc/dm3 - Extractor Ca(CH3COO)2, 0.5mol/L, pH 7.0 - Potential acidity (H+Al)
taxonIdCalais020	Interchangeable Bases	0.53	cmolc/dm3	2008-10-21T09:26Z	Interchangeable bases	PlotCalais01_/_Interchangeable bases - cmolc/dm3 - Interchangeable bases - Sum of Interchangeable bases
taxonIdCalais020	Effective cation exchange capacity	1.71	cmolc/dm3	2008-10-21T09:26Z	Effective cation exchange capacity	PlotCalais01_/_Effective cation exchange capacity - cmolc/dm3 - Effective cation exchange capacity - Effective cation exchange capacity
taxonIdCalais020	Cation exchange capacity at pH 7.0	5.13	cmolc/dm3	2008-10-21T09:26Z	Cation exchange capacity at pH 7.0	PlotCalais01_/_Cation exchange capacity at pH 7.0 - cmolc/dm3 - Cation exchange capacity at pH 7.0 - Cation exchange capacity at pH 7.0
taxonIdCalais020	Saturation of bases	10.3	Percentage	2008-10-21T09:26Z	Saturation of bases	PlotCalais01_/_Saturation of bases - Percentage - Saturation of bases - Saturation of bases
taxonIdCalais020	Saturation of aluminium	69	Percentage	2008-10-21T09:26Z	Saturation of aluminium	PlotCalais01_/_Saturation of aluminium - Percentage - Saturation of aluminium - Saturation of aluminium
taxonIdCalais020	Remaining phosphorus	37.8	mg/L	2008-10-21T09:26Z	Extraction with 0.01 mol/L CaCl2	PlotCalais01_/_Remaining phosphorus - mg/L - Remaining phosphorus - Remaining phosphorus
taxonIdCalais020	Rocky outcrops	10	Percentage	2008-10-21T09:26Z	Estimation	PlotCalais01_/_Rocky outcrops - Percentage - Estimation - Rocky outcrops
taxonIdCalais020	Inclination	3	Percentage	2008-10-21T09:26Z	Estimation	PlotCalais01_/_Inclination - Percentage - Estimation - Inclination
taxonIdCalais022	Coarse sand content	39	Percentage	2008-10-21T09:26Z	sieving	PlotCalais01_/_Coarse sand content - Percentage - sieving - Coarse sand content
taxonIdCalais022	Fine sand content	34	Percentage	2008-10-21T09:26Z	sieving	PlotCalais01_/_Fine sand content - Percentage - sieving - Fine sand content
taxonIdCalais022	Silt content	15	Percentage	2008-10-21T09:26Z	sieving	PlotCalais01_/_Silt content - Percentage - sieving - Silt content
taxonIdCalais022	Clay content	12	Percentage	2008-10-21T09:26Z	sieving	PlotCalais01_/_Clay content - Percentage - sieving - Clay content
taxonIdCalais022	Soil acidity (pH)	5.12	nondimensional	2008-10-21T09:26Z	pH in water	PlotCalais01_/_Soil acidity (pH) - nondimensional - pH in water - Soil acidity (pH)
taxonIdCalais022	Availability of phosphorus	1.4	mg/dm3	2008-10-21T09:26Z	Extrator Mehlich 1	PlotCalais01_/_Availability of phosphorus - mg/dm3 - Extrator Mehlich 1 - Availability of phosphorus
taxonIdCalais022	Potassium availability	30	mg/dm3	2008-10-21T09:26Z	Extrator Mehlich 1	PlotCalais01_/_Potassium availability - mg/dm3 - Extrator Mehlich 1 - Potassium availability
taxonIdCalais022	Calcium availability	0.36	cmolc/dm3	2008-10-21T09:26Z	Extractor KCl 1mol/L	PlotCalais01_/_Calcium availability - cmolc/dm3 - Extractor KCl 1mol/L - Calcium availability
taxonIdCalais022	Magnesium availability	0.09	cmolc/dm3	2008-10-21T09:26Z	Extractor KCl 1mol/L	PlotCalais01_/_Magnesium availability - cmolc/dm3 - Extractor KCl 1mol/L - Magnesium availability
taxonIdCalais022	Aluminium avalaibility	1.18	cmolc/dm3	2008-10-21T09:26Z	Extractor KCl 1mol/L	PlotCalais01_/_Aluminium avalaibility - cmolc/dm3 - Extractor KCl 1mol/L - Aluminium avalaibility
taxonIdCalais022	Potential Acidity (H+AL)	4.6	cmolc/dm3	2008-10-21T09:26Z	Extractor Ca(CH3COO)2, 0.5mol/L, pH 7.0	PlotCalais01_/_Potential acidity (H+Al) - cmolc/dm3 - Extractor Ca(CH3COO)2, 0.5mol/L, pH 7.0 - Potential acidity (H+Al)
taxonIdCalais022	Interchangeable Bases	0.53	cmolc/dm3	2008-10-21T09:26Z	Interchangeable bases	PlotCalais01_/_Interchangeable bases - cmolc/dm3 - Interchangeable bases - Sum of Interchangeable bases
taxonIdCalais022	Effective cation exchange capacity	1.71	cmolc/dm3	2008-10-21T09:26Z	Effective cation exchange capacity	PlotCalais01_/_Effective cation exchange capacity - cmolc/dm3 - Effective cation exchange capacity - Effective cation exchange capacity
taxonIdCalais022	Cation exchange capacity at pH 7.0	5.13	cmolc/dm3	2008-10-21T09:26Z	Cation exchange capacity at pH 7.0	PlotCalais01_/_Cation exchange capacity at pH 7.0 - cmolc/dm3 - Cation exchange capacity at pH 7.0 - Cation exchange capacity at pH 7.0
taxonIdCalais022	Saturation of bases	10.3	Percentage	2008-10-21T09:26Z	Saturation of bases	PlotCalais01_/_Saturation of bases - Percentage - Saturation of bases - Saturation of bases
taxonIdCalais022	Saturation of aluminium	69	Percentage	2008-10-21T09:26Z	Saturation of aluminium	PlotCalais01_/_Saturation of aluminium - Percentage - Saturation of aluminium - Saturation of aluminium
taxonIdCalais022	Remaining phosphorus	37.8	mg/L	2008-10-21T09:26Z	Extraction with 0.01 mol/L CaCl2	PlotCalais01_/_Remaining phosphorus - mg/L - Remaining phosphorus - Remaining phosphorus
taxonIdCalais022	Rocky outcrops	10	Percentage	2008-10-21T09:26Z	Estimation	PlotCalais01_/_Rocky outcrops - Percentage - Estimation - Rocky outcrops
taxonIdCalais022	Inclination	3	Percentage	2008-10-21T09:26Z	Estimation	PlotCalais01_/_Inclination - Percentage - Estimation - Inclination
taxonIdCalais023	Coarse sand content	39	Percentage	2008-10-21T09:26Z	sieving	PlotCalais01_/_Coarse sand content - Percentage - sieving - Coarse sand content
taxonIdCalais023	Fine sand content	34	Percentage	2008-10-21T09:26Z	sieving	PlotCalais01_/_Fine sand content - Percentage - sieving - Fine sand content
taxonIdCalais023	Silt content	15	Percentage	2008-10-21T09:26Z	sieving	PlotCalais01_/_Silt content - Percentage - sieving - Silt content
taxonIdCalais023	Clay content	12	Percentage	2008-10-21T09:26Z	sieving	PlotCalais01_/_Clay content - Percentage - sieving - Clay content
taxonIdCalais023	Soil acidity (pH)	5.12	nondimensional	2008-10-21T09:26Z	pH in water	PlotCalais01_/_Soil acidity (pH) - nondimensional - pH in water - Soil acidity (pH)
taxonIdCalais023	Availability of phosphorus	1.4	mg/dm3	2008-10-21T09:26Z	Extrator Mehlich 1	PlotCalais01_/_Availability of phosphorus - mg/dm3 - Extrator Mehlich 1 - Availability of phosphorus
taxonIdCalais023	Potassium availability	30	mg/dm3	2008-10-21T09:26Z	Extrator Mehlich 1	PlotCalais01_/_Potassium availability - mg/dm3 - Extrator Mehlich 1 - Potassium availability
taxonIdCalais023	Calcium availability	0.36	cmolc/dm3	2008-10-21T09:26Z	Extractor KCl 1mol/L	PlotCalais01_/_Calcium availability - cmolc/dm3 - Extractor KCl 1mol/L - Calcium availability
taxonIdCalais023	Magnesium availability	0.09	cmolc/dm3	2008-10-21T09:26Z	Extractor KCl 1mol/L	PlotCalais01_/_Magnesium availability - cmolc/dm3 - Extractor KCl 1mol/L - Magnesium availability
taxonIdCalais023	Aluminium avalaibility	1.18	cmolc/dm3	2008-10-21T09:26Z	Extractor KCl 1mol/L	PlotCalais01_/_Aluminium avalaibility - cmolc/dm3 - Extractor KCl 1mol/L - Aluminium avalaibility
taxonIdCalais023	Potential Acidity (H+AL)	4.6	cmolc/dm3	2008-10-21T09:26Z	Extractor Ca(CH3COO)2, 0.5mol/L, pH 7.0	PlotCalais01_/_Potential acidity (H+Al) - cmolc/dm3 - Extractor Ca(CH3COO)2, 0.5mol/L, pH 7.0 - Potential acidity (H+Al)
taxonIdCalais023	Interchangeable Bases	0.53	cmolc/dm3	2008-10-21T09:26Z	Interchangeable bases	PlotCalais01_/_Interchangeable bases - cmolc/dm3 - Interchangeable bases - Sum of Interchangeable bases
taxonIdCalais023	Effective cation exchange capacity	1.71	cmolc/dm3	2008-10-21T09:26Z	Effective cation exchange capacity	PlotCalais01_/_Effective cation exchange capacity - cmolc/dm3 - Effective cation exchange capacity - Effective cation exchange capacity
taxonIdCalais023	Cation exchange capacity at pH 7.0	5.13	cmolc/dm3	2008-10-21T09:26Z	Cation exchange capacity at pH 7.0	PlotCalais01_/_Cation exchange capacity at pH 7.0 - cmolc/dm3 - Cation exchange capacity at pH 7.0 - Cation exchange capacity at pH 7.0
taxonIdCalais023	Saturation of bases	10.3	Percentage	2008-10-21T09:26Z	Saturation of bases	PlotCalais01_/_Saturation of bases - Percentage - Saturation of bases - Saturation of bases
taxonIdCalais023	Saturation of aluminium	69	Percentage	2008-10-21T09:26Z	Saturation of aluminium	PlotCalais01_/_Saturation of aluminium - Percentage - Saturation of aluminium - Saturation of aluminium
taxonIdCalais023	Remaining phosphorus	37.8	mg/L	2008-10-21T09:26Z	Extraction with 0.01 mol/L CaCl2	PlotCalais01_/_Remaining phosphorus - mg/L - Remaining phosphorus - Remaining phosphorus
taxonIdCalais023	Rocky outcrops	10	Percentage	2008-10-21T09:26Z	Estimation	PlotCalais01_/_Rocky outcrops - Percentage - Estimation - Rocky outcrops
taxonIdCalais023	Inclination	3	Percentage	2008-10-21T09:26Z	Estimation	PlotCalais01_/_Inclination - Percentage - Estimation - Inclination
taxonIdCalais026	Coarse sand content	39	Percentage	2008-10-21T09:26Z	sieving	PlotCalais01_/_Coarse sand content - Percentage - sieving - Coarse sand content
taxonIdCalais026	Fine sand content	34	Percentage	2008-10-21T09:26Z	sieving	PlotCalais01_/_Fine sand content - Percentage - sieving - Fine sand content
taxonIdCalais026	Silt content	15	Percentage	2008-10-21T09:26Z	sieving	PlotCalais01_/_Silt content - Percentage - sieving - Silt content
taxonIdCalais026	Clay content	12	Percentage	2008-10-21T09:26Z	sieving	PlotCalais01_/_Clay content - Percentage - sieving - Clay content
taxonIdCalais026	Soil acidity (pH)	5.12	nondimensional	2008-10-21T09:26Z	pH in water	PlotCalais01_/_Soil acidity (pH) - nondimensional - pH in water - Soil acidity (pH)
taxonIdCalais026	Availability of phosphorus	1.4	mg/dm3	2008-10-21T09:26Z	Extrator Mehlich 1	PlotCalais01_/_Availability of phosphorus - mg/dm3 - Extrator Mehlich 1 - Availability of phosphorus
taxonIdCalais026	Potassium availability	30	mg/dm3	2008-10-21T09:26Z	Extrator Mehlich 1	PlotCalais01_/_Potassium availability - mg/dm3 - Extrator Mehlich 1 - Potassium availability
taxonIdCalais026	Calcium availability	0.36	cmolc/dm3	2008-10-21T09:26Z	Extractor KCl 1mol/L	PlotCalais01_/_Calcium availability - cmolc/dm3 - Extractor KCl 1mol/L - Calcium availability
taxonIdCalais026	Magnesium availability	0.09	cmolc/dm3	2008-10-21T09:26Z	Extractor KCl 1mol/L	PlotCalais01_/_Magnesium availability - cmolc/dm3 - Extractor KCl 1mol/L - Magnesium availability
taxonIdCalais026	Aluminium avalaibility	1.18	cmolc/dm3	2008-10-21T09:26Z	Extractor KCl 1mol/L	PlotCalais01_/_Aluminium avalaibility - cmolc/dm3 - Extractor KCl 1mol/L - Aluminium avalaibility
taxonIdCalais026	Potential Acidity (H+AL)	4.6	cmolc/dm3	2008-10-21T09:26Z	Extractor Ca(CH3COO)2, 0.5mol/L, pH 7.0	PlotCalais01_/_Potential acidity (H+Al) - cmolc/dm3 - Extractor Ca(CH3COO)2, 0.5mol/L, pH 7.0 - Potential acidity (H+Al)
taxonIdCalais026	Interchangeable Bases	0.53	cmolc/dm3	2008-10-21T09:26Z	Interchangeable bases	PlotCalais01_/_Interchangeable bases - cmolc/dm3 - Interchangeable bases - Sum of Interchangeable bases
taxonIdCalais026	Effective cation exchange capacity	1.71	cmolc/dm3	2008-10-21T09:26Z	Effective cation exchange capacity	PlotCalais01_/_Effective cation exchange capacity - cmolc/dm3 - Effective cation exchange capacity - Effective cation exchange capacity
taxonIdCalais026	Cation exchange capacity at pH 7.0	5.13	cmolc/dm3	2008-10-21T09:26Z	Cation exchange capacity at pH 7.0	PlotCalais01_/_Cation exchange capacity at pH 7.0 - cmolc/dm3 - Cation exchange capacity at pH 7.0 - Cation exchange capacity at pH 7.0
taxonIdCalais026	Saturation of bases	10.3	Percentage	2008-10-21T09:26Z	Saturation of bases	PlotCalais01_/_Saturation of bases - Percentage - Saturation of bases - Saturation of bases
taxonIdCalais026	Saturation of aluminium	69	Percentage	2008-10-21T09:26Z	Saturation of aluminium	PlotCalais01_/_Saturation of aluminium - Percentage - Saturation of aluminium - Saturation of aluminium
taxonIdCalais026	Remaining phosphorus	37.8	mg/L	2008-10-21T09:26Z	Extraction with 0.01 mol/L CaCl2	PlotCalais01_/_Remaining phosphorus - mg/L - Remaining phosphorus - Remaining phosphorus
taxonIdCalais026	Rocky outcrops	10	Percentage	2008-10-21T09:26Z	Estimation	PlotCalais01_/_Rocky outcrops - Percentage - Estimation - Rocky outcrops
taxonIdCalais026	Inclination	3	Percentage	2008-10-21T09:26Z	Estimation	PlotCalais01_/_Inclination - Percentage - Estimation - Inclination
taxonIdCalais034	Coarse sand content	39	Percentage	2008-10-21T09:26Z	sieving	PlotCalais01_/_Coarse sand content - Percentage - sieving - Coarse sand content
taxonIdCalais034	Fine sand content	34	Percentage	2008-10-21T09:26Z	sieving	PlotCalais01_/_Fine sand content - Percentage - sieving - Fine sand content
taxonIdCalais034	Silt content	15	Percentage	2008-10-21T09:26Z	sieving	PlotCalais01_/_Silt content - Percentage - sieving - Silt content
taxonIdCalais034	Clay content	12	Percentage	2008-10-21T09:26Z	sieving	PlotCalais01_/_Clay content - Percentage - sieving - Clay content
taxonIdCalais034	Soil acidity (pH)	5.12	nondimensional	2008-10-21T09:26Z	pH in water	PlotCalais01_/_Soil acidity (pH) - nondimensional - pH in water - Soil acidity (pH)
taxonIdCalais034	Availability of phosphorus	1.4	mg/dm3	2008-10-21T09:26Z	Extrator Mehlich 1	PlotCalais01_/_Availability of phosphorus - mg/dm3 - Extrator Mehlich 1 - Availability of phosphorus
taxonIdCalais034	Potassium availability	30	mg/dm3	2008-10-21T09:26Z	Extrator Mehlich 1	PlotCalais01_/_Potassium availability - mg/dm3 - Extrator Mehlich 1 - Potassium availability
taxonIdCalais034	Calcium availability	0.36	cmolc/dm3	2008-10-21T09:26Z	Extractor KCl 1mol/L	PlotCalais01_/_Calcium availability - cmolc/dm3 - Extractor KCl 1mol/L - Calcium availability
taxonIdCalais034	Magnesium availability	0.09	cmolc/dm3	2008-10-21T09:26Z	Extractor KCl 1mol/L	PlotCalais01_/_Magnesium availability - cmolc/dm3 - Extractor KCl 1mol/L - Magnesium availability
taxonIdCalais034	Aluminium avalaibility	1.18	cmolc/dm3	2008-10-21T09:26Z	Extractor KCl 1mol/L	PlotCalais01_/_Aluminium avalaibility - cmolc/dm3 - Extractor KCl 1mol/L - Aluminium avalaibility
taxonIdCalais034	Potential Acidity (H+AL)	4.6	cmolc/dm3	2008-10-21T09:26Z	Extractor Ca(CH3COO)2, 0.5mol/L, pH 7.0	PlotCalais01_/_Potential acidity (H+Al) - cmolc/dm3 - Extractor Ca(CH3COO)2, 0.5mol/L, pH 7.0 - Potential acidity (H+Al)
taxonIdCalais034	Interchangeable Bases	0.53	cmolc/dm3	2008-10-21T09:26Z	Interchangeable bases	PlotCalais01_/_Interchangeable bases - cmolc/dm3 - Interchangeable bases - Sum of Interchangeable bases
taxonIdCalais034	Effective cation exchange capacity	1.71	cmolc/dm3	2008-10-21T09:26Z	Effective cation exchange capacity	PlotCalais01_/_Effective cation exchange capacity - cmolc/dm3 - Effective cation exchange capacity - Effective cation exchange capacity
taxonIdCalais034	Cation exchange capacity at pH 7.0	5.13	cmolc/dm3	2008-10-21T09:26Z	Cation exchange capacity at pH 7.0	PlotCalais01_/_Cation exchange capacity at pH 7.0 - cmolc/dm3 - Cation exchange capacity at pH 7.0 - Cation exchange capacity at pH 7.0
taxonIdCalais034	Saturation of bases	10.3	Percentage	2008-10-21T09:26Z	Saturation of bases	PlotCalais01_/_Saturation of bases - Percentage - Saturation of bases - Saturation of bases
taxonIdCalais034	Saturation of aluminium	69	Percentage	2008-10-21T09:26Z	Saturation of aluminium	PlotCalais01_/_Saturation of aluminium - Percentage - Saturation of aluminium - Saturation of aluminium
taxonIdCalais034	Remaining phosphorus	37.8	mg/L	2008-10-21T09:26Z	Extraction with 0.01 mol/L CaCl2	PlotCalais01_/_Remaining phosphorus - mg/L - Remaining phosphorus - Remaining phosphorus
taxonIdCalais034	Rocky outcrops	10	Percentage	2008-10-21T09:26Z	Estimation	PlotCalais01_/_Rocky outcrops - Percentage - Estimation - Rocky outcrops
taxonIdCalais034	Inclination	3	Percentage	2008-10-21T09:26Z	Estimation	PlotCalais01_/_Inclination - Percentage - Estimation - Inclination
taxonIdCalais038	Coarse sand content	39	Percentage	2008-10-21T09:26Z	sieving	PlotCalais01_/_Coarse sand content - Percentage - sieving - Coarse sand content
taxonIdCalais038	Fine sand content	34	Percentage	2008-10-21T09:26Z	sieving	PlotCalais01_/_Fine sand content - Percentage - sieving - Fine sand content
taxonIdCalais038	Silt content	15	Percentage	2008-10-21T09:26Z	sieving	PlotCalais01_/_Silt content - Percentage - sieving - Silt content
taxonIdCalais038	Clay content	12	Percentage	2008-10-21T09:26Z	sieving	PlotCalais01_/_Clay content - Percentage - sieving - Clay content
taxonIdCalais038	Soil acidity (pH)	5.12	nondimensional	2008-10-21T09:26Z	pH in water	PlotCalais01_/_Soil acidity (pH) - nondimensional - pH in water - Soil acidity (pH)
taxonIdCalais038	Availability of phosphorus	1.4	mg/dm3	2008-10-21T09:26Z	Extrator Mehlich 1	PlotCalais01_/_Availability of phosphorus - mg/dm3 - Extrator Mehlich 1 - Availability of phosphorus
taxonIdCalais038	Potassium availability	30	mg/dm3	2008-10-21T09:26Z	Extrator Mehlich 1	PlotCalais01_/_Potassium availability - mg/dm3 - Extrator Mehlich 1 - Potassium availability
taxonIdCalais038	Calcium availability	0.36	cmolc/dm3	2008-10-21T09:26Z	Extractor KCl 1mol/L	PlotCalais01_/_Calcium availability - cmolc/dm3 - Extractor KCl 1mol/L - Calcium availability
taxonIdCalais038	Magnesium availability	0.09	cmolc/dm3	2008-10-21T09:26Z	Extractor KCl 1mol/L	PlotCalais01_/_Magnesium availability - cmolc/dm3 - Extractor KCl 1mol/L - Magnesium availability
taxonIdCalais038	Aluminium avalaibility	1.18	cmolc/dm3	2008-10-21T09:26Z	Extractor KCl 1mol/L	PlotCalais01_/_Aluminium avalaibility - cmolc/dm3 - Extractor KCl 1mol/L - Aluminium avalaibility
taxonIdCalais038	Potential Acidity (H+AL)	4.6	cmolc/dm3	2008-10-21T09:26Z	Extractor Ca(CH3COO)2, 0.5mol/L, pH 7.0	PlotCalais01_/_Potential acidity (H+Al) - cmolc/dm3 - Extractor Ca(CH3COO)2, 0.5mol/L, pH 7.0 - Potential acidity (H+Al)
taxonIdCalais038	Interchangeable Bases	0.53	cmolc/dm3	2008-10-21T09:26Z	Interchangeable bases	PlotCalais01_/_Interchangeable bases - cmolc/dm3 - Interchangeable bases - Sum of Interchangeable bases
taxonIdCalais038	Effective cation exchange capacity	1.71	cmolc/dm3	2008-10-21T09:26Z	Effective cation exchange capacity	PlotCalais01_/_Effective cation exchange capacity - cmolc/dm3 - Effective cation exchange capacity - Effective cation exchange capacity
taxonIdCalais038	Cation exchange capacity at pH 7.0	5.13	cmolc/dm3	2008-10-21T09:26Z	Cation exchange capacity at pH 7.0	PlotCalais01_/_Cation exchange capacity at pH 7.0 - cmolc/dm3 - Cation exchange capacity at pH 7.0 - Cation exchange capacity at pH 7.0
taxonIdCalais038	Saturation of bases	10.3	Percentage	2008-10-21T09:26Z	Saturation of bases	PlotCalais01_/_Saturation of bases - Percentage - Saturation of bases - Saturation of bases
taxonIdCalais038	Saturation of aluminium	69	Percentage	2008-10-21T09:26Z	Saturation of aluminium	PlotCalais01_/_Saturation of aluminium - Percentage - Saturation of aluminium - Saturation of aluminium
taxonIdCalais038	Remaining phosphorus	37.8	mg/L	2008-10-21T09:26Z	Extraction with 0.01 mol/L CaCl2	PlotCalais01_/_Remaining phosphorus - mg/L - Remaining phosphorus - Remaining phosphorus
taxonIdCalais038	Rocky outcrops	10	Percentage	2008-10-21T09:26Z	Estimation	PlotCalais01_/_Rocky outcrops - Percentage - Estimation - Rocky outcrops
taxonIdCalais038	Inclination	3	Percentage	2008-10-21T09:26Z	Estimation	PlotCalais01_/_Inclination - Percentage - Estimation - Inclination
taxonIdCalais040	Coarse sand content	39	Percentage	2008-10-21T09:26Z	sieving	PlotCalais01_/_Coarse sand content - Percentage - sieving - Coarse sand content
taxonIdCalais040	Fine sand content	34	Percentage	2008-10-21T09:26Z	sieving	PlotCalais01_/_Fine sand content - Percentage - sieving - Fine sand content
taxonIdCalais040	Silt content	15	Percentage	2008-10-21T09:26Z	sieving	PlotCalais01_/_Silt content - Percentage - sieving - Silt content
taxonIdCalais040	Clay content	12	Percentage	2008-10-21T09:26Z	sieving	PlotCalais01_/_Clay content - Percentage - sieving - Clay content
taxonIdCalais040	Soil acidity (pH)	5.12	nondimensional	2008-10-21T09:26Z	pH in water	PlotCalais01_/_Soil acidity (pH) - nondimensional - pH in water - Soil acidity (pH)
taxonIdCalais040	Availability of phosphorus	1.4	mg/dm3	2008-10-21T09:26Z	Extrator Mehlich 1	PlotCalais01_/_Availability of phosphorus - mg/dm3 - Extrator Mehlich 1 - Availability of phosphorus
taxonIdCalais040	Potassium availability	30	mg/dm3	2008-10-21T09:26Z	Extrator Mehlich 1	PlotCalais01_/_Potassium availability - mg/dm3 - Extrator Mehlich 1 - Potassium availability
taxonIdCalais040	Calcium availability	0.36	cmolc/dm3	2008-10-21T09:26Z	Extractor KCl 1mol/L	PlotCalais01_/_Calcium availability - cmolc/dm3 - Extractor KCl 1mol/L - Calcium availability
taxonIdCalais040	Magnesium availability	0.09	cmolc/dm3	2008-10-21T09:26Z	Extractor KCl 1mol/L	PlotCalais01_/_Magnesium availability - cmolc/dm3 - Extractor KCl 1mol/L - Magnesium availability
taxonIdCalais040	Aluminium avalaibility	1.18	cmolc/dm3	2008-10-21T09:26Z	Extractor KCl 1mol/L	PlotCalais01_/_Aluminium avalaibility - cmolc/dm3 - Extractor KCl 1mol/L - Aluminium avalaibility
taxonIdCalais040	Potential Acidity (H+AL)	4.6	cmolc/dm3	2008-10-21T09:26Z	Extractor Ca(CH3COO)2, 0.5mol/L, pH 7.0	PlotCalais01_/_Potential acidity (H+Al) - cmolc/dm3 - Extractor Ca(CH3COO)2, 0.5mol/L, pH 7.0 - Potential acidity (H+Al)
taxonIdCalais040	Interchangeable Bases	0.53	cmolc/dm3	2008-10-21T09:26Z	Interchangeable bases	PlotCalais01_/_Interchangeable bases - cmolc/dm3 - Interchangeable bases - Sum of Interchangeable bases
taxonIdCalais040	Effective cation exchange capacity	1.71	cmolc/dm3	2008-10-21T09:26Z	Effective cation exchange capacity	PlotCalais01_/_Effective cation exchange capacity - cmolc/dm3 - Effective cation exchange capacity - Effective cation exchange capacity
taxonIdCalais040	Cation exchange capacity at pH 7.0	5.13	cmolc/dm3	2008-10-21T09:26Z	Cation exchange capacity at pH 7.0	PlotCalais01_/_Cation exchange capacity at pH 7.0 - cmolc/dm3 - Cation exchange capacity at pH 7.0 - Cation exchange capacity at pH 7.0
taxonIdCalais040	Saturation of bases	10.3	Percentage	2008-10-21T09:26Z	Saturation of bases	PlotCalais01_/_Saturation of bases - Percentage - Saturation of bases - Saturation of bases
taxonIdCalais040	Saturation of aluminium	69	Percentage	2008-10-21T09:26Z	Saturation of aluminium	PlotCalais01_/_Saturation of aluminium - Percentage - Saturation of aluminium - Saturation of aluminium
taxonIdCalais040	Remaining phosphorus	37.8	mg/L	2008-10-21T09:26Z	Extraction with 0.01 mol/L CaCl2	PlotCalais01_/_Remaining phosphorus - mg/L - Remaining phosphorus - Remaining phosphorus
taxonIdCalais040	Rocky outcrops	10	Percentage	2008-10-21T09:26Z	Estimation	PlotCalais01_/_Rocky outcrops - Percentage - Estimation - Rocky outcrops
taxonIdCalais040	Inclination	3	Percentage	2008-10-21T09:26Z	Estimation	PlotCalais01_/_Inclination - Percentage - Estimation - Inclination
taxonIdCalais042	Coarse sand content	39	Percentage	2008-10-21T09:26Z	sieving	PlotCalais01_/_Coarse sand content - Percentage - sieving - Coarse sand content
taxonIdCalais042	Fine sand content	34	Percentage	2008-10-21T09:26Z	sieving	PlotCalais01_/_Fine sand content - Percentage - sieving - Fine sand content
taxonIdCalais042	Silt content	15	Percentage	2008-10-21T09:26Z	sieving	PlotCalais01_/_Silt content - Percentage - sieving - Silt content
taxonIdCalais042	Clay content	12	Percentage	2008-10-21T09:26Z	sieving	PlotCalais01_/_Clay content - Percentage - sieving - Clay content
taxonIdCalais042	Soil acidity (pH)	5.12	nondimensional	2008-10-21T09:26Z	pH in water	PlotCalais01_/_Soil acidity (pH) - nondimensional - pH in water - Soil acidity (pH)
taxonIdCalais042	Availability of phosphorus	1.4	mg/dm3	2008-10-21T09:26Z	Extrator Mehlich 1	PlotCalais01_/_Availability of phosphorus - mg/dm3 - Extrator Mehlich 1 - Availability of phosphorus
taxonIdCalais042	Potassium availability	30	mg/dm3	2008-10-21T09:26Z	Extrator Mehlich 1	PlotCalais01_/_Potassium availability - mg/dm3 - Extrator Mehlich 1 - Potassium availability
taxonIdCalais042	Calcium availability	0.36	cmolc/dm3	2008-10-21T09:26Z	Extractor KCl 1mol/L	PlotCalais01_/_Calcium availability - cmolc/dm3 - Extractor KCl 1mol/L - Calcium availability
taxonIdCalais042	Magnesium availability	0.09	cmolc/dm3	2008-10-21T09:26Z	Extractor KCl 1mol/L	PlotCalais01_/_Magnesium availability - cmolc/dm3 - Extractor KCl 1mol/L - Magnesium availability
taxonIdCalais042	Aluminium avalaibility	1.18	cmolc/dm3	2008-10-21T09:26Z	Extractor KCl 1mol/L	PlotCalais01_/_Aluminium avalaibility - cmolc/dm3 - Extractor KCl 1mol/L - Aluminium avalaibility
taxonIdCalais042	Potential Acidity (H+AL)	4.6	cmolc/dm3	2008-10-21T09:26Z	Extractor Ca(CH3COO)2, 0.5mol/L, pH 7.0	PlotCalais01_/_Potential acidity (H+Al) - cmolc/dm3 - Extractor Ca(CH3COO)2, 0.5mol/L, pH 7.0 - Potential acidity (H+Al)
taxonIdCalais042	Interchangeable Bases	0.53	cmolc/dm3	2008-10-21T09:26Z	Interchangeable bases	PlotCalais01_/_Interchangeable bases - cmolc/dm3 - Interchangeable bases - Sum of Interchangeable bases
taxonIdCalais042	Effective cation exchange capacity	1.71	cmolc/dm3	2008-10-21T09:26Z	Effective cation exchange capacity	PlotCalais01_/_Effective cation exchange capacity - cmolc/dm3 - Effective cation exchange capacity - Effective cation exchange capacity
taxonIdCalais042	Cation exchange capacity at pH 7.0	5.13	cmolc/dm3	2008-10-21T09:26Z	Cation exchange capacity at pH 7.0	PlotCalais01_/_Cation exchange capacity at pH 7.0 - cmolc/dm3 - Cation exchange capacity at pH 7.0 - Cation exchange capacity at pH 7.0
taxonIdCalais042	Saturation of bases	10.3	Percentage	2008-10-21T09:26Z	Saturation of bases	PlotCalais01_/_Saturation of bases - Percentage - Saturation of bases - Saturation of bases
taxonIdCalais042	Saturation of aluminium	69	Percentage	2008-10-21T09:26Z	Saturation of aluminium	PlotCalais01_/_Saturation of aluminium - Percentage - Saturation of aluminium - Saturation of aluminium
taxonIdCalais042	Remaining phosphorus	37.8	mg/L	2008-10-21T09:26Z	Extraction with 0.01 mol/L CaCl2	PlotCalais01_/_Remaining phosphorus - mg/L - Remaining phosphorus - Remaining phosphorus
taxonIdCalais042	Rocky outcrops	10	Percentage	2008-10-21T09:26Z	Estimation	PlotCalais01_/_Rocky outcrops - Percentage - Estimation - Rocky outcrops
taxonIdCalais042	Inclination	3	Percentage	2008-10-21T09:26Z	Estimation	PlotCalais01_/_Inclination - Percentage - Estimation - Inclination
taxonIdCalais044	Coarse sand content	39	Percentage	2008-10-21T09:26Z	sieving	PlotCalais01_/_Coarse sand content - Percentage - sieving - Coarse sand content
taxonIdCalais044	Fine sand content	34	Percentage	2008-10-21T09:26Z	sieving	PlotCalais01_/_Fine sand content - Percentage - sieving - Fine sand content
taxonIdCalais044	Silt content	15	Percentage	2008-10-21T09:26Z	sieving	PlotCalais01_/_Silt content - Percentage - sieving - Silt content
taxonIdCalais044	Clay content	12	Percentage	2008-10-21T09:26Z	sieving	PlotCalais01_/_Clay content - Percentage - sieving - Clay content
taxonIdCalais044	Soil acidity (pH)	5.12	nondimensional	2008-10-21T09:26Z	pH in water	PlotCalais01_/_Soil acidity (pH) - nondimensional - pH in water - Soil acidity (pH)
taxonIdCalais044	Availability of phosphorus	1.4	mg/dm3	2008-10-21T09:26Z	Extrator Mehlich 1	PlotCalais01_/_Availability of phosphorus - mg/dm3 - Extrator Mehlich 1 - Availability of phosphorus
taxonIdCalais044	Potassium availability	30	mg/dm3	2008-10-21T09:26Z	Extrator Mehlich 1	PlotCalais01_/_Potassium availability - mg/dm3 - Extrator Mehlich 1 - Potassium availability
taxonIdCalais044	Calcium availability	0.36	cmolc/dm3	2008-10-21T09:26Z	Extractor KCl 1mol/L	PlotCalais01_/_Calcium availability - cmolc/dm3 - Extractor KCl 1mol/L - Calcium availability
taxonIdCalais044	Magnesium availability	0.09	cmolc/dm3	2008-10-21T09:26Z	Extractor KCl 1mol/L	PlotCalais01_/_Magnesium availability - cmolc/dm3 - Extractor KCl 1mol/L - Magnesium availability
taxonIdCalais044	Aluminium avalaibility	1.18	cmolc/dm3	2008-10-21T09:26Z	Extractor KCl 1mol/L	PlotCalais01_/_Aluminium avalaibility - cmolc/dm3 - Extractor KCl 1mol/L - Aluminium avalaibility
taxonIdCalais044	Potential Acidity (H+AL)	4.6	cmolc/dm3	2008-10-21T09:26Z	Extractor Ca(CH3COO)2, 0.5mol/L, pH 7.0	PlotCalais01_/_Potential acidity (H+Al) - cmolc/dm3 - Extractor Ca(CH3COO)2, 0.5mol/L, pH 7.0 - Potential acidity (H+Al)
taxonIdCalais044	Interchangeable Bases	0.53	cmolc/dm3	2008-10-21T09:26Z	Interchangeable bases	PlotCalais01_/_Interchangeable bases - cmolc/dm3 - Interchangeable bases - Sum of Interchangeable bases
taxonIdCalais044	Effective cation exchange capacity	1.71	cmolc/dm3	2008-10-21T09:26Z	Effective cation exchange capacity	PlotCalais01_/_Effective cation exchange capacity - cmolc/dm3 - Effective cation exchange capacity - Effective cation exchange capacity
taxonIdCalais044	Cation exchange capacity at pH 7.0	5.13	cmolc/dm3	2008-10-21T09:26Z	Cation exchange capacity at pH 7.0	PlotCalais01_/_Cation exchange capacity at pH 7.0 - cmolc/dm3 - Cation exchange capacity at pH 7.0 - Cation exchange capacity at pH 7.0
taxonIdCalais044	Saturation of bases	10.3	Percentage	2008-10-21T09:26Z	Saturation of bases	PlotCalais01_/_Saturation of bases - Percentage - Saturation of bases - Saturation of bases
taxonIdCalais044	Saturation of aluminium	69	Percentage	2008-10-21T09:26Z	Saturation of aluminium	PlotCalais01_/_Saturation of aluminium - Percentage - Saturation of aluminium - Saturation of aluminium
taxonIdCalais044	Remaining phosphorus	37.8	mg/L	2008-10-21T09:26Z	Extraction with 0.01 mol/L CaCl2	PlotCalais01_/_Remaining phosphorus - mg/L - Remaining phosphorus - Remaining phosphorus
taxonIdCalais044	Rocky outcrops	10	Percentage	2008-10-21T09:26Z	Estimation	PlotCalais01_/_Rocky outcrops - Percentage - Estimation - Rocky outcrops
taxonIdCalais044	Inclination	3	Percentage	2008-10-21T09:26Z	Estimation	PlotCalais01_/_Inclination - Percentage - Estimation - Inclination
taxonIdCalais049	Coarse sand content	39	Percentage	2008-10-21T09:26Z	sieving	PlotCalais01_/_Coarse sand content - Percentage - sieving - Coarse sand content
taxonIdCalais049	Fine sand content	34	Percentage	2008-10-21T09:26Z	sieving	PlotCalais01_/_Fine sand content - Percentage - sieving - Fine sand content
taxonIdCalais049	Silt content	15	Percentage	2008-10-21T09:26Z	sieving	PlotCalais01_/_Silt content - Percentage - sieving - Silt content
taxonIdCalais049	Clay content	12	Percentage	2008-10-21T09:26Z	sieving	PlotCalais01_/_Clay content - Percentage - sieving - Clay content
taxonIdCalais049	Soil acidity (pH)	5.12	nondimensional	2008-10-21T09:26Z	pH in water	PlotCalais01_/_Soil acidity (pH) - nondimensional - pH in water - Soil acidity (pH)
taxonIdCalais049	Availability of phosphorus	1.4	mg/dm3	2008-10-21T09:26Z	Extrator Mehlich 1	PlotCalais01_/_Availability of phosphorus - mg/dm3 - Extrator Mehlich 1 - Availability of phosphorus
taxonIdCalais049	Potassium availability	30	mg/dm3	2008-10-21T09:26Z	Extrator Mehlich 1	PlotCalais01_/_Potassium availability - mg/dm3 - Extrator Mehlich 1 - Potassium availability
taxonIdCalais049	Calcium availability	0.36	cmolc/dm3	2008-10-21T09:26Z	Extractor KCl 1mol/L	PlotCalais01_/_Calcium availability - cmolc/dm3 - Extractor KCl 1mol/L - Calcium availability
taxonIdCalais049	Magnesium availability	0.09	cmolc/dm3	2008-10-21T09:26Z	Extractor KCl 1mol/L	PlotCalais01_/_Magnesium availability - cmolc/dm3 - Extractor KCl 1mol/L - Magnesium availability
taxonIdCalais049	Aluminium avalaibility	1.18	cmolc/dm3	2008-10-21T09:26Z	Extractor KCl 1mol/L	PlotCalais01_/_Aluminium avalaibility - cmolc/dm3 - Extractor KCl 1mol/L - Aluminium avalaibility
taxonIdCalais049	Potential Acidity (H+AL)	4.6	cmolc/dm3	2008-10-21T09:26Z	Extractor Ca(CH3COO)2, 0.5mol/L, pH 7.0	PlotCalais01_/_Potential acidity (H+Al) - cmolc/dm3 - Extractor Ca(CH3COO)2, 0.5mol/L, pH 7.0 - Potential acidity (H+Al)
taxonIdCalais049	Interchangeable Bases	0.53	cmolc/dm3	2008-10-21T09:26Z	Interchangeable bases	PlotCalais01_/_Interchangeable bases - cmolc/dm3 - Interchangeable bases - Sum of Interchangeable bases
taxonIdCalais049	Effective cation exchange capacity	1.71	cmolc/dm3	2008-10-21T09:26Z	Effective cation exchange capacity	PlotCalais01_/_Effective cation exchange capacity - cmolc/dm3 - Effective cation exchange capacity - Effective cation exchange capacity
taxonIdCalais049	Cation exchange capacity at pH 7.0	5.13	cmolc/dm3	2008-10-21T09:26Z	Cation exchange capacity at pH 7.0	PlotCalais01_/_Cation exchange capacity at pH 7.0 - cmolc/dm3 - Cation exchange capacity at pH 7.0 - Cation exchange capacity at pH 7.0
taxonIdCalais049	Saturation of bases	10.3	Percentage	2008-10-21T09:26Z	Saturation of bases	PlotCalais01_/_Saturation of bases - Percentage - Saturation of bases - Saturation of bases
taxonIdCalais049	Saturation of aluminium	69	Percentage	2008-10-21T09:26Z	Saturation of aluminium	PlotCalais01_/_Saturation of aluminium - Percentage - Saturation of aluminium - Saturation of aluminium
taxonIdCalais049	Remaining phosphorus	37.8	mg/L	2008-10-21T09:26Z	Extraction with 0.01 mol/L CaCl2	PlotCalais01_/_Remaining phosphorus - mg/L - Remaining phosphorus - Remaining phosphorus
taxonIdCalais049	Rocky outcrops	10	Percentage	2008-10-21T09:26Z	Estimation	PlotCalais01_/_Rocky outcrops - Percentage - Estimation - Rocky outcrops
taxonIdCalais049	Inclination	3	Percentage	2008-10-21T09:26Z	Estimation	PlotCalais01_/_Inclination - Percentage - Estimation - Inclination
taxonIdCalais051	Coarse sand content	39	Percentage	2008-10-21T09:26Z	sieving	PlotCalais01_/_Coarse sand content - Percentage - sieving - Coarse sand content
taxonIdCalais051	Fine sand content	34	Percentage	2008-10-21T09:26Z	sieving	PlotCalais01_/_Fine sand content - Percentage - sieving - Fine sand content
taxonIdCalais051	Silt content	15	Percentage	2008-10-21T09:26Z	sieving	PlotCalais01_/_Silt content - Percentage - sieving - Silt content
taxonIdCalais051	Clay content	12	Percentage	2008-10-21T09:26Z	sieving	PlotCalais01_/_Clay content - Percentage - sieving - Clay content
taxonIdCalais051	Soil acidity (pH)	5.12	nondimensional	2008-10-21T09:26Z	pH in water	PlotCalais01_/_Soil acidity (pH) - nondimensional - pH in water - Soil acidity (pH)
taxonIdCalais051	Availability of phosphorus	1.4	mg/dm3	2008-10-21T09:26Z	Extrator Mehlich 1	PlotCalais01_/_Availability of phosphorus - mg/dm3 - Extrator Mehlich 1 - Availability of phosphorus
taxonIdCalais051	Potassium availability	30	mg/dm3	2008-10-21T09:26Z	Extrator Mehlich 1	PlotCalais01_/_Potassium availability - mg/dm3 - Extrator Mehlich 1 - Potassium availability
taxonIdCalais051	Calcium availability	0.36	cmolc/dm3	2008-10-21T09:26Z	Extractor KCl 1mol/L	PlotCalais01_/_Calcium availability - cmolc/dm3 - Extractor KCl 1mol/L - Calcium availability
taxonIdCalais051	Magnesium availability	0.09	cmolc/dm3	2008-10-21T09:26Z	Extractor KCl 1mol/L	PlotCalais01_/_Magnesium availability - cmolc/dm3 - Extractor KCl 1mol/L - Magnesium availability
taxonIdCalais051	Aluminium avalaibility	1.18	cmolc/dm3	2008-10-21T09:26Z	Extractor KCl 1mol/L	PlotCalais01_/_Aluminium avalaibility - cmolc/dm3 - Extractor KCl 1mol/L - Aluminium avalaibility
taxonIdCalais051	Potential Acidity (H+AL)	4.6	cmolc/dm3	2008-10-21T09:26Z	Extractor Ca(CH3COO)2, 0.5mol/L, pH 7.0	PlotCalais01_/_Potential acidity (H+Al) - cmolc/dm3 - Extractor Ca(CH3COO)2, 0.5mol/L, pH 7.0 - Potential acidity (H+Al)
taxonIdCalais051	Interchangeable Bases	0.53	cmolc/dm3	2008-10-21T09:26Z	Interchangeable bases	PlotCalais01_/_Interchangeable bases - cmolc/dm3 - Interchangeable bases - Sum of Interchangeable bases
taxonIdCalais051	Effective cation exchange capacity	1.71	cmolc/dm3	2008-10-21T09:26Z	Effective cation exchange capacity	PlotCalais01_/_Effective cation exchange capacity - cmolc/dm3 - Effective cation exchange capacity - Effective cation exchange capacity
taxonIdCalais051	Cation exchange capacity at pH 7.0	5.13	cmolc/dm3	2008-10-21T09:26Z	Cation exchange capacity at pH 7.0	PlotCalais01_/_Cation exchange capacity at pH 7.0 - cmolc/dm3 - Cation exchange capacity at pH 7.0 - Cation exchange capacity at pH 7.0
taxonIdCalais051	Saturation of bases	10.3	Percentage	2008-10-21T09:26Z	Saturation of bases	PlotCalais01_/_Saturation of bases - Percentage - Saturation of bases - Saturation of bases
taxonIdCalais051	Saturation of aluminium	69	Percentage	2008-10-21T09:26Z	Saturation of aluminium	PlotCalais01_/_Saturation of aluminium - Percentage - Saturation of aluminium - Saturation of aluminium
taxonIdCalais051	Remaining phosphorus	37.8	mg/L	2008-10-21T09:26Z	Extraction with 0.01 mol/L CaCl2	PlotCalais01_/_Remaining phosphorus - mg/L - Remaining phosphorus - Remaining phosphorus
taxonIdCalais051	Rocky outcrops	10	Percentage	2008-10-21T09:26Z	Estimation	PlotCalais01_/_Rocky outcrops - Percentage - Estimation - Rocky outcrops
taxonIdCalais051	Inclination	3	Percentage	2008-10-21T09:26Z	Estimation	PlotCalais01_/_Inclination - Percentage - Estimation - Inclination
taxonIdCalais052	Coarse sand content	39	Percentage	2008-10-21T09:26Z	sieving	PlotCalais01_/_Coarse sand content - Percentage - sieving - Coarse sand content
taxonIdCalais052	Fine sand content	34	Percentage	2008-10-21T09:26Z	sieving	PlotCalais01_/_Fine sand content - Percentage - sieving - Fine sand content
taxonIdCalais052	Silt content	15	Percentage	2008-10-21T09:26Z	sieving	PlotCalais01_/_Silt content - Percentage - sieving - Silt content
taxonIdCalais052	Clay content	12	Percentage	2008-10-21T09:26Z	sieving	PlotCalais01_/_Clay content - Percentage - sieving - Clay content
taxonIdCalais052	Soil acidity (pH)	5.12	nondimensional	2008-10-21T09:26Z	pH in water	PlotCalais01_/_Soil acidity (pH) - nondimensional - pH in water - Soil acidity (pH)
taxonIdCalais052	Availability of phosphorus	1.4	mg/dm3	2008-10-21T09:26Z	Extrator Mehlich 1	PlotCalais01_/_Availability of phosphorus - mg/dm3 - Extrator Mehlich 1 - Availability of phosphorus
taxonIdCalais052	Potassium availability	30	mg/dm3	2008-10-21T09:26Z	Extrator Mehlich 1	PlotCalais01_/_Potassium availability - mg/dm3 - Extrator Mehlich 1 - Potassium availability
taxonIdCalais052	Calcium availability	0.36	cmolc/dm3	2008-10-21T09:26Z	Extractor KCl 1mol/L	PlotCalais01_/_Calcium availability - cmolc/dm3 - Extractor KCl 1mol/L - Calcium availability
taxonIdCalais052	Magnesium availability	0.09	cmolc/dm3	2008-10-21T09:26Z	Extractor KCl 1mol/L	PlotCalais01_/_Magnesium availability - cmolc/dm3 - Extractor KCl 1mol/L - Magnesium availability
taxonIdCalais052	Aluminium avalaibility	1.18	cmolc/dm3	2008-10-21T09:26Z	Extractor KCl 1mol/L	PlotCalais01_/_Aluminium avalaibility - cmolc/dm3 - Extractor KCl 1mol/L - Aluminium avalaibility
taxonIdCalais052	Potential Acidity (H+AL)	4.6	cmolc/dm3	2008-10-21T09:26Z	Extractor Ca(CH3COO)2, 0.5mol/L, pH 7.0	PlotCalais01_/_Potential acidity (H+Al) - cmolc/dm3 - Extractor Ca(CH3COO)2, 0.5mol/L, pH 7.0 - Potential acidity (H+Al)
taxonIdCalais052	Interchangeable Bases	0.53	cmolc/dm3	2008-10-21T09:26Z	Interchangeable bases	PlotCalais01_/_Interchangeable bases - cmolc/dm3 - Interchangeable bases - Sum of Interchangeable bases
taxonIdCalais052	Effective cation exchange capacity	1.71	cmolc/dm3	2008-10-21T09:26Z	Effective cation exchange capacity	PlotCalais01_/_Effective cation exchange capacity - cmolc/dm3 - Effective cation exchange capacity - Effective cation exchange capacity
taxonIdCalais052	Cation exchange capacity at pH 7.0	5.13	cmolc/dm3	2008-10-21T09:26Z	Cation exchange capacity at pH 7.0	PlotCalais01_/_Cation exchange capacity at pH 7.0 - cmolc/dm3 - Cation exchange capacity at pH 7.0 - Cation exchange capacity at pH 7.0
taxonIdCalais052	Saturation of bases	10.3	Percentage	2008-10-21T09:26Z	Saturation of bases	PlotCalais01_/_Saturation of bases - Percentage - Saturation of bases - Saturation of bases
taxonIdCalais052	Saturation of aluminium	69	Percentage	2008-10-21T09:26Z	Saturation of aluminium	PlotCalais01_/_Saturation of aluminium - Percentage - Saturation of aluminium - Saturation of aluminium
taxonIdCalais052	Remaining phosphorus	37.8	mg/L	2008-10-21T09:26Z	Extraction with 0.01 mol/L CaCl2	PlotCalais01_/_Remaining phosphorus - mg/L - Remaining phosphorus - Remaining phosphorus
taxonIdCalais052	Rocky outcrops	10	Percentage	2008-10-21T09:26Z	Estimation	PlotCalais01_/_Rocky outcrops - Percentage - Estimation - Rocky outcrops
taxonIdCalais052	Inclination	3	Percentage	2008-10-21T09:26Z	Estimation	PlotCalais01_/_Inclination - Percentage - Estimation - Inclination
taxonIdCalais056	Coarse sand content	39	Percentage	2008-10-21T09:26Z	sieving	PlotCalais01_/_Coarse sand content - Percentage - sieving - Coarse sand content
taxonIdCalais056	Fine sand content	34	Percentage	2008-10-21T09:26Z	sieving	PlotCalais01_/_Fine sand content - Percentage - sieving - Fine sand content
taxonIdCalais056	Silt content	15	Percentage	2008-10-21T09:26Z	sieving	PlotCalais01_/_Silt content - Percentage - sieving - Silt content
taxonIdCalais056	Clay content	12	Percentage	2008-10-21T09:26Z	sieving	PlotCalais01_/_Clay content - Percentage - sieving - Clay content
taxonIdCalais056	Soil acidity (pH)	5.12	nondimensional	2008-10-21T09:26Z	pH in water	PlotCalais01_/_Soil acidity (pH) - nondimensional - pH in water - Soil acidity (pH)
taxonIdCalais056	Availability of phosphorus	1.4	mg/dm3	2008-10-21T09:26Z	Extrator Mehlich 1	PlotCalais01_/_Availability of phosphorus - mg/dm3 - Extrator Mehlich 1 - Availability of phosphorus
taxonIdCalais056	Potassium availability	30	mg/dm3	2008-10-21T09:26Z	Extrator Mehlich 1	PlotCalais01_/_Potassium availability - mg/dm3 - Extrator Mehlich 1 - Potassium availability
taxonIdCalais056	Calcium availability	0.36	cmolc/dm3	2008-10-21T09:26Z	Extractor KCl 1mol/L	PlotCalais01_/_Calcium availability - cmolc/dm3 - Extractor KCl 1mol/L - Calcium availability
taxonIdCalais056	Magnesium availability	0.09	cmolc/dm3	2008-10-21T09:26Z	Extractor KCl 1mol/L	PlotCalais01_/_Magnesium availability - cmolc/dm3 - Extractor KCl 1mol/L - Magnesium availability
taxonIdCalais056	Aluminium avalaibility	1.18	cmolc/dm3	2008-10-21T09:26Z	Extractor KCl 1mol/L	PlotCalais01_/_Aluminium avalaibility - cmolc/dm3 - Extractor KCl 1mol/L - Aluminium avalaibility
taxonIdCalais056	Potential Acidity (H+AL)	4.6	cmolc/dm3	2008-10-21T09:26Z	Extractor Ca(CH3COO)2, 0.5mol/L, pH 7.0	PlotCalais01_/_Potential acidity (H+Al) - cmolc/dm3 - Extractor Ca(CH3COO)2, 0.5mol/L, pH 7.0 - Potential acidity (H+Al)
taxonIdCalais056	Interchangeable Bases	0.53	cmolc/dm3	2008-10-21T09:26Z	Interchangeable bases	PlotCalais01_/_Interchangeable bases - cmolc/dm3 - Interchangeable bases - Sum of Interchangeable bases
taxonIdCalais056	Effective cation exchange capacity	1.71	cmolc/dm3	2008-10-21T09:26Z	Effective cation exchange capacity	PlotCalais01_/_Effective cation exchange capacity - cmolc/dm3 - Effective cation exchange capacity - Effective cation exchange capacity
taxonIdCalais056	Cation exchange capacity at pH 7.0	5.13	cmolc/dm3	2008-10-21T09:26Z	Cation exchange capacity at pH 7.0	PlotCalais01_/_Cation exchange capacity at pH 7.0 - cmolc/dm3 - Cation exchange capacity at pH 7.0 - Cation exchange capacity at pH 7.0
taxonIdCalais056	Saturation of bases	10.3	Percentage	2008-10-21T09:26Z	Saturation of bases	PlotCalais01_/_Saturation of bases - Percentage - Saturation of bases - Saturation of bases
taxonIdCalais056	Saturation of aluminium	69	Percentage	2008-10-21T09:26Z	Saturation of aluminium	PlotCalais01_/_Saturation of aluminium - Percentage - Saturation of aluminium - Saturation of aluminium
taxonIdCalais056	Remaining phosphorus	37.8	mg/L	2008-10-21T09:26Z	Extraction with 0.01 mol/L CaCl2	PlotCalais01_/_Remaining phosphorus - mg/L - Remaining phosphorus - Remaining phosphorus
taxonIdCalais056	Rocky outcrops	10	Percentage	2008-10-21T09:26Z	Estimation	PlotCalais01_/_Rocky outcrops - Percentage - Estimation - Rocky outcrops
taxonIdCalais056	Inclination	3	Percentage	2008-10-21T09:26Z	Estimation	PlotCalais01_/_Inclination - Percentage - Estimation - Inclination
taxonIdCalais058	Coarse sand content	39	Percentage	2008-10-21T09:26Z	sieving	PlotCalais01_/_Coarse sand content - Percentage - sieving - Coarse sand content
taxonIdCalais058	Fine sand content	34	Percentage	2008-10-21T09:26Z	sieving	PlotCalais01_/_Fine sand content - Percentage - sieving - Fine sand content
taxonIdCalais058	Silt content	15	Percentage	2008-10-21T09:26Z	sieving	PlotCalais01_/_Silt content - Percentage - sieving - Silt content
taxonIdCalais058	Clay content	12	Percentage	2008-10-21T09:26Z	sieving	PlotCalais01_/_Clay content - Percentage - sieving - Clay content
taxonIdCalais058	Soil acidity (pH)	5.12	nondimensional	2008-10-21T09:26Z	pH in water	PlotCalais01_/_Soil acidity (pH) - nondimensional - pH in water - Soil acidity (pH)
taxonIdCalais058	Availability of phosphorus	1.4	mg/dm3	2008-10-21T09:26Z	Extrator Mehlich 1	PlotCalais01_/_Availability of phosphorus - mg/dm3 - Extrator Mehlich 1 - Availability of phosphorus
taxonIdCalais058	Potassium availability	30	mg/dm3	2008-10-21T09:26Z	Extrator Mehlich 1	PlotCalais01_/_Potassium availability - mg/dm3 - Extrator Mehlich 1 - Potassium availability
taxonIdCalais058	Calcium availability	0.36	cmolc/dm3	2008-10-21T09:26Z	Extractor KCl 1mol/L	PlotCalais01_/_Calcium availability - cmolc/dm3 - Extractor KCl 1mol/L - Calcium availability
taxonIdCalais058	Magnesium availability	0.09	cmolc/dm3	2008-10-21T09:26Z	Extractor KCl 1mol/L	PlotCalais01_/_Magnesium availability - cmolc/dm3 - Extractor KCl 1mol/L - Magnesium availability
taxonIdCalais058	Aluminium avalaibility	1.18	cmolc/dm3	2008-10-21T09:26Z	Extractor KCl 1mol/L	PlotCalais01_/_Aluminium avalaibility - cmolc/dm3 - Extractor KCl 1mol/L - Aluminium avalaibility
taxonIdCalais058	Potential Acidity (H+AL)	4.6	cmolc/dm3	2008-10-21T09:26Z	Extractor Ca(CH3COO)2, 0.5mol/L, pH 7.0	PlotCalais01_/_Potential acidity (H+Al) - cmolc/dm3 - Extractor Ca(CH3COO)2, 0.5mol/L, pH 7.0 - Potential acidity (H+Al)
taxonIdCalais058	Interchangeable Bases	0.53	cmolc/dm3	2008-10-21T09:26Z	Interchangeable bases	PlotCalais01_/_Interchangeable bases - cmolc/dm3 - Interchangeable bases - Sum of Interchangeable bases
taxonIdCalais058	Effective cation exchange capacity	1.71	cmolc/dm3	2008-10-21T09:26Z	Effective cation exchange capacity	PlotCalais01_/_Effective cation exchange capacity - cmolc/dm3 - Effective cation exchange capacity - Effective cation exchange capacity
taxonIdCalais058	Cation exchange capacity at pH 7.0	5.13	cmolc/dm3	2008-10-21T09:26Z	Cation exchange capacity at pH 7.0	PlotCalais01_/_Cation exchange capacity at pH 7.0 - cmolc/dm3 - Cation exchange capacity at pH 7.0 - Cation exchange capacity at pH 7.0
taxonIdCalais058	Saturation of bases	10.3	Percentage	2008-10-21T09:26Z	Saturation of bases	PlotCalais01_/_Saturation of bases - Percentage - Saturation of bases - Saturation of bases
taxonIdCalais058	Saturation of aluminium	69	Percentage	2008-10-21T09:26Z	Saturation of aluminium	PlotCalais01_/_Saturation of aluminium - Percentage - Saturation of aluminium - Saturation of aluminium
taxonIdCalais058	Remaining phosphorus	37.8	mg/L	2008-10-21T09:26Z	Extraction with 0.01 mol/L CaCl2	PlotCalais01_/_Remaining phosphorus - mg/L - Remaining phosphorus - Remaining phosphorus
taxonIdCalais058	Rocky outcrops	10	Percentage	2008-10-21T09:26Z	Estimation	PlotCalais01_/_Rocky outcrops - Percentage - Estimation - Rocky outcrops
taxonIdCalais058	Inclination	3	Percentage	2008-10-21T09:26Z	Estimation	PlotCalais01_/_Inclination - Percentage - Estimation - Inclination
taxonIdCalais061	Coarse sand content	39	Percentage	2008-10-21T09:26Z	sieving	PlotCalais01_/_Coarse sand content - Percentage - sieving - Coarse sand content
taxonIdCalais061	Fine sand content	34	Percentage	2008-10-21T09:26Z	sieving	PlotCalais01_/_Fine sand content - Percentage - sieving - Fine sand content
taxonIdCalais061	Silt content	15	Percentage	2008-10-21T09:26Z	sieving	PlotCalais01_/_Silt content - Percentage - sieving - Silt content
taxonIdCalais061	Clay content	12	Percentage	2008-10-21T09:26Z	sieving	PlotCalais01_/_Clay content - Percentage - sieving - Clay content
taxonIdCalais061	Soil acidity (pH)	5.12	nondimensional	2008-10-21T09:26Z	pH in water	PlotCalais01_/_Soil acidity (pH) - nondimensional - pH in water - Soil acidity (pH)
taxonIdCalais061	Availability of phosphorus	1.4	mg/dm3	2008-10-21T09:26Z	Extrator Mehlich 1	PlotCalais01_/_Availability of phosphorus - mg/dm3 - Extrator Mehlich 1 - Availability of phosphorus
taxonIdCalais061	Potassium availability	30	mg/dm3	2008-10-21T09:26Z	Extrator Mehlich 1	PlotCalais01_/_Potassium availability - mg/dm3 - Extrator Mehlich 1 - Potassium availability
taxonIdCalais061	Calcium availability	0.36	cmolc/dm3	2008-10-21T09:26Z	Extractor KCl 1mol/L	PlotCalais01_/_Calcium availability - cmolc/dm3 - Extractor KCl 1mol/L - Calcium availability
taxonIdCalais061	Magnesium availability	0.09	cmolc/dm3	2008-10-21T09:26Z	Extractor KCl 1mol/L	PlotCalais01_/_Magnesium availability - cmolc/dm3 - Extractor KCl 1mol/L - Magnesium availability
taxonIdCalais061	Aluminium avalaibility	1.18	cmolc/dm3	2008-10-21T09:26Z	Extractor KCl 1mol/L	PlotCalais01_/_Aluminium avalaibility - cmolc/dm3 - Extractor KCl 1mol/L - Aluminium avalaibility
taxonIdCalais061	Potential Acidity (H+AL)	4.6	cmolc/dm3	2008-10-21T09:26Z	Extractor Ca(CH3COO)2, 0.5mol/L, pH 7.0	PlotCalais01_/_Potential acidity (H+Al) - cmolc/dm3 - Extractor Ca(CH3COO)2, 0.5mol/L, pH 7.0 - Potential acidity (H+Al)
taxonIdCalais061	Interchangeable Bases	0.53	cmolc/dm3	2008-10-21T09:26Z	Interchangeable bases	PlotCalais01_/_Interchangeable bases - cmolc/dm3 - Interchangeable bases - Sum of Interchangeable bases
taxonIdCalais061	Effective cation exchange capacity	1.71	cmolc/dm3	2008-10-21T09:26Z	Effective cation exchange capacity	PlotCalais01_/_Effective cation exchange capacity - cmolc/dm3 - Effective cation exchange capacity - Effective cation exchange capacity
taxonIdCalais061	Cation exchange capacity at pH 7.0	5.13	cmolc/dm3	2008-10-21T09:26Z	Cation exchange capacity at pH 7.0	PlotCalais01_/_Cation exchange capacity at pH 7.0 - cmolc/dm3 - Cation exchange capacity at pH 7.0 - Cation exchange capacity at pH 7.0
taxonIdCalais061	Saturation of bases	10.3	Percentage	2008-10-21T09:26Z	Saturation of bases	PlotCalais01_/_Saturation of bases - Percentage - Saturation of bases - Saturation of bases
taxonIdCalais061	Saturation of aluminium	69	Percentage	2008-10-21T09:26Z	Saturation of aluminium	PlotCalais01_/_Saturation of aluminium - Percentage - Saturation of aluminium - Saturation of aluminium
taxonIdCalais061	Remaining phosphorus	37.8	mg/L	2008-10-21T09:26Z	Extraction with 0.01 mol/L CaCl2	PlotCalais01_/_Remaining phosphorus - mg/L - Remaining phosphorus - Remaining phosphorus
taxonIdCalais061	Rocky outcrops	10	Percentage	2008-10-21T09:26Z	Estimation	PlotCalais01_/_Rocky outcrops - Percentage - Estimation - Rocky outcrops
taxonIdCalais061	Inclination	3	Percentage	2008-10-21T09:26Z	Estimation	PlotCalais01_/_Inclination - Percentage - Estimation - Inclination
taxonIdCalais063	Coarse sand content	39	Percentage	2008-10-21T09:26Z	sieving	PlotCalais01_/_Coarse sand content - Percentage - sieving - Coarse sand content
taxonIdCalais063	Fine sand content	34	Percentage	2008-10-21T09:26Z	sieving	PlotCalais01_/_Fine sand content - Percentage - sieving - Fine sand content
taxonIdCalais063	Silt content	15	Percentage	2008-10-21T09:26Z	sieving	PlotCalais01_/_Silt content - Percentage - sieving - Silt content
taxonIdCalais063	Clay content	12	Percentage	2008-10-21T09:26Z	sieving	PlotCalais01_/_Clay content - Percentage - sieving - Clay content
taxonIdCalais063	Soil acidity (pH)	5.12	nondimensional	2008-10-21T09:26Z	pH in water	PlotCalais01_/_Soil acidity (pH) - nondimensional - pH in water - Soil acidity (pH)
taxonIdCalais063	Availability of phosphorus	1.4	mg/dm3	2008-10-21T09:26Z	Extrator Mehlich 1	PlotCalais01_/_Availability of phosphorus - mg/dm3 - Extrator Mehlich 1 - Availability of phosphorus
taxonIdCalais063	Potassium availability	30	mg/dm3	2008-10-21T09:26Z	Extrator Mehlich 1	PlotCalais01_/_Potassium availability - mg/dm3 - Extrator Mehlich 1 - Potassium availability
taxonIdCalais063	Calcium availability	0.36	cmolc/dm3	2008-10-21T09:26Z	Extractor KCl 1mol/L	PlotCalais01_/_Calcium availability - cmolc/dm3 - Extractor KCl 1mol/L - Calcium availability
taxonIdCalais063	Magnesium availability	0.09	cmolc/dm3	2008-10-21T09:26Z	Extractor KCl 1mol/L	PlotCalais01_/_Magnesium availability - cmolc/dm3 - Extractor KCl 1mol/L - Magnesium availability
taxonIdCalais063	Aluminium avalaibility	1.18	cmolc/dm3	2008-10-21T09:26Z	Extractor KCl 1mol/L	PlotCalais01_/_Aluminium avalaibility - cmolc/dm3 - Extractor KCl 1mol/L - Aluminium avalaibility
taxonIdCalais063	Potential Acidity (H+AL)	4.6	cmolc/dm3	2008-10-21T09:26Z	Extractor Ca(CH3COO)2, 0.5mol/L, pH 7.0	PlotCalais01_/_Potential acidity (H+Al) - cmolc/dm3 - Extractor Ca(CH3COO)2, 0.5mol/L, pH 7.0 - Potential acidity (H+Al)
taxonIdCalais063	Interchangeable Bases	0.53	cmolc/dm3	2008-10-21T09:26Z	Interchangeable bases	PlotCalais01_/_Interchangeable bases - cmolc/dm3 - Interchangeable bases - Sum of Interchangeable bases
taxonIdCalais063	Effective cation exchange capacity	1.71	cmolc/dm3	2008-10-21T09:26Z	Effective cation exchange capacity	PlotCalais01_/_Effective cation exchange capacity - cmolc/dm3 - Effective cation exchange capacity - Effective cation exchange capacity
taxonIdCalais063	Cation exchange capacity at pH 7.0	5.13	cmolc/dm3	2008-10-21T09:26Z	Cation exchange capacity at pH 7.0	PlotCalais01_/_Cation exchange capacity at pH 7.0 - cmolc/dm3 - Cation exchange capacity at pH 7.0 - Cation exchange capacity at pH 7.0
taxonIdCalais063	Saturation of bases	10.3	Percentage	2008-10-21T09:26Z	Saturation of bases	PlotCalais01_/_Saturation of bases - Percentage - Saturation of bases - Saturation of bases
taxonIdCalais063	Saturation of aluminium	69	Percentage	2008-10-21T09:26Z	Saturation of aluminium	PlotCalais01_/_Saturation of aluminium - Percentage - Saturation of aluminium - Saturation of aluminium
taxonIdCalais063	Remaining phosphorus	37.8	mg/L	2008-10-21T09:26Z	Extraction with 0.01 mol/L CaCl2	PlotCalais01_/_Remaining phosphorus - mg/L - Remaining phosphorus - Remaining phosphorus
taxonIdCalais063	Rocky outcrops	10	Percentage	2008-10-21T09:26Z	Estimation	PlotCalais01_/_Rocky outcrops - Percentage - Estimation - Rocky outcrops
taxonIdCalais063	Inclination	3	Percentage	2008-10-21T09:26Z	Estimation	PlotCalais01_/_Inclination - Percentage - Estimation - Inclination
taxonIdCalais065	Coarse sand content	39	Percentage	2008-10-21T09:26Z	sieving	PlotCalais01_/_Coarse sand content - Percentage - sieving - Coarse sand content
taxonIdCalais065	Fine sand content	34	Percentage	2008-10-21T09:26Z	sieving	PlotCalais01_/_Fine sand content - Percentage - sieving - Fine sand content
taxonIdCalais065	Silt content	15	Percentage	2008-10-21T09:26Z	sieving	PlotCalais01_/_Silt content - Percentage - sieving - Silt content
taxonIdCalais065	Clay content	12	Percentage	2008-10-21T09:26Z	sieving	PlotCalais01_/_Clay content - Percentage - sieving - Clay content
taxonIdCalais065	Soil acidity (pH)	5.12	nondimensional	2008-10-21T09:26Z	pH in water	PlotCalais01_/_Soil acidity (pH) - nondimensional - pH in water - Soil acidity (pH)
taxonIdCalais065	Availability of phosphorus	1.4	mg/dm3	2008-10-21T09:26Z	Extrator Mehlich 1	PlotCalais01_/_Availability of phosphorus - mg/dm3 - Extrator Mehlich 1 - Availability of phosphorus
taxonIdCalais065	Potassium availability	30	mg/dm3	2008-10-21T09:26Z	Extrator Mehlich 1	PlotCalais01_/_Potassium availability - mg/dm3 - Extrator Mehlich 1 - Potassium availability
taxonIdCalais065	Calcium availability	0.36	cmolc/dm3	2008-10-21T09:26Z	Extractor KCl 1mol/L	PlotCalais01_/_Calcium availability - cmolc/dm3 - Extractor KCl 1mol/L - Calcium availability
taxonIdCalais065	Magnesium availability	0.09	cmolc/dm3	2008-10-21T09:26Z	Extractor KCl 1mol/L	PlotCalais01_/_Magnesium availability - cmolc/dm3 - Extractor KCl 1mol/L - Magnesium availability
taxonIdCalais065	Aluminium avalaibility	1.18	cmolc/dm3	2008-10-21T09:26Z	Extractor KCl 1mol/L	PlotCalais01_/_Aluminium avalaibility - cmolc/dm3 - Extractor KCl 1mol/L - Aluminium avalaibility
taxonIdCalais065	Potential Acidity (H+AL)	4.6	cmolc/dm3	2008-10-21T09:26Z	Extractor Ca(CH3COO)2, 0.5mol/L, pH 7.0	PlotCalais01_/_Potential acidity (H+Al) - cmolc/dm3 - Extractor Ca(CH3COO)2, 0.5mol/L, pH 7.0 - Potential acidity (H+Al)
taxonIdCalais065	Interchangeable Bases	0.53	cmolc/dm3	2008-10-21T09:26Z	Interchangeable bases	PlotCalais01_/_Interchangeable bases - cmolc/dm3 - Interchangeable bases - Sum of Interchangeable bases
taxonIdCalais065	Effective cation exchange capacity	1.71	cmolc/dm3	2008-10-21T09:26Z	Effective cation exchange capacity	PlotCalais01_/_Effective cation exchange capacity - cmolc/dm3 - Effective cation exchange capacity - Effective cation exchange capacity
taxonIdCalais065	Cation exchange capacity at pH 7.0	5.13	cmolc/dm3	2008-10-21T09:26Z	Cation exchange capacity at pH 7.0	PlotCalais01_/_Cation exchange capacity at pH 7.0 - cmolc/dm3 - Cation exchange capacity at pH 7.0 - Cation exchange capacity at pH 7.0
taxonIdCalais065	Saturation of bases	10.3	Percentage	2008-10-21T09:26Z	Saturation of bases	PlotCalais01_/_Saturation of bases - Percentage - Saturation of bases - Saturation of bases
taxonIdCalais065	Saturation of aluminium	69	Percentage	2008-10-21T09:26Z	Saturation of aluminium	PlotCalais01_/_Saturation of aluminium - Percentage - Saturation of aluminium - Saturation of aluminium
taxonIdCalais065	Remaining phosphorus	37.8	mg/L	2008-10-21T09:26Z	Extraction with 0.01 mol/L CaCl2	PlotCalais01_/_Remaining phosphorus - mg/L - Remaining phosphorus - Remaining phosphorus
taxonIdCalais065	Rocky outcrops	10	Percentage	2008-10-21T09:26Z	Estimation	PlotCalais01_/_Rocky outcrops - Percentage - Estimation - Rocky outcrops
taxonIdCalais065	Inclination	3	Percentage	2008-10-21T09:26Z	Estimation	PlotCalais01_/_Inclination - Percentage - Estimation - Inclination
taxonIdCalais067	Coarse sand content	39	Percentage	2008-10-21T09:26Z	sieving	PlotCalais01_/_Coarse sand content - Percentage - sieving - Coarse sand content
taxonIdCalais067	Fine sand content	34	Percentage	2008-10-21T09:26Z	sieving	PlotCalais01_/_Fine sand content - Percentage - sieving - Fine sand content
taxonIdCalais067	Silt content	15	Percentage	2008-10-21T09:26Z	sieving	PlotCalais01_/_Silt content - Percentage - sieving - Silt content
taxonIdCalais067	Clay content	12	Percentage	2008-10-21T09:26Z	sieving	PlotCalais01_/_Clay content - Percentage - sieving - Clay content
taxonIdCalais067	Soil acidity (pH)	5.12	nondimensional	2008-10-21T09:26Z	pH in water	PlotCalais01_/_Soil acidity (pH) - nondimensional - pH in water - Soil acidity (pH)
taxonIdCalais067	Availability of phosphorus	1.4	mg/dm3	2008-10-21T09:26Z	Extrator Mehlich 1	PlotCalais01_/_Availability of phosphorus - mg/dm3 - Extrator Mehlich 1 - Availability of phosphorus
taxonIdCalais067	Potassium availability	30	mg/dm3	2008-10-21T09:26Z	Extrator Mehlich 1	PlotCalais01_/_Potassium availability - mg/dm3 - Extrator Mehlich 1 - Potassium availability
taxonIdCalais067	Calcium availability	0.36	cmolc/dm3	2008-10-21T09:26Z	Extractor KCl 1mol/L	PlotCalais01_/_Calcium availability - cmolc/dm3 - Extractor KCl 1mol/L - Calcium availability
taxonIdCalais067	Magnesium availability	0.09	cmolc/dm3	2008-10-21T09:26Z	Extractor KCl 1mol/L	PlotCalais01_/_Magnesium availability - cmolc/dm3 - Extractor KCl 1mol/L - Magnesium availability
taxonIdCalais067	Aluminium avalaibility	1.18	cmolc/dm3	2008-10-21T09:26Z	Extractor KCl 1mol/L	PlotCalais01_/_Aluminium avalaibility - cmolc/dm3 - Extractor KCl 1mol/L - Aluminium avalaibility
taxonIdCalais067	Potential Acidity (H+AL)	4.6	cmolc/dm3	2008-10-21T09:26Z	Extractor Ca(CH3COO)2, 0.5mol/L, pH 7.0	PlotCalais01_/_Potential acidity (H+Al) - cmolc/dm3 - Extractor Ca(CH3COO)2, 0.5mol/L, pH 7.0 - Potential acidity (H+Al)
taxonIdCalais067	Interchangeable Bases	0.53	cmolc/dm3	2008-10-21T09:26Z	Interchangeable bases	PlotCalais01_/_Interchangeable bases - cmolc/dm3 - Interchangeable bases - Sum of Interchangeable bases
taxonIdCalais067	Effective cation exchange capacity	1.71	cmolc/dm3	2008-10-21T09:26Z	Effective cation exchange capacity	PlotCalais01_/_Effective cation exchange capacity - cmolc/dm3 - Effective cation exchange capacity - Effective cation exchange capacity
taxonIdCalais067	Cation exchange capacity at pH 7.0	5.13	cmolc/dm3	2008-10-21T09:26Z	Cation exchange capacity at pH 7.0	PlotCalais01_/_Cation exchange capacity at pH 7.0 - cmolc/dm3 - Cation exchange capacity at pH 7.0 - Cation exchange capacity at pH 7.0
taxonIdCalais067	Saturation of bases	10.3	Percentage	2008-10-21T09:26Z	Saturation of bases	PlotCalais01_/_Saturation of bases - Percentage - Saturation of bases - Saturation of bases
taxonIdCalais067	Saturation of aluminium	69	Percentage	2008-10-21T09:26Z	Saturation of aluminium	PlotCalais01_/_Saturation of aluminium - Percentage - Saturation of aluminium - Saturation of aluminium
taxonIdCalais067	Remaining phosphorus	37.8	mg/L	2008-10-21T09:26Z	Extraction with 0.01 mol/L CaCl2	PlotCalais01_/_Remaining phosphorus - mg/L - Remaining phosphorus - Remaining phosphorus
taxonIdCalais067	Rocky outcrops	10	Percentage	2008-10-21T09:26Z	Estimation	PlotCalais01_/_Rocky outcrops - Percentage - Estimation - Rocky outcrops
taxonIdCalais067	Inclination	3	Percentage	2008-10-21T09:26Z	Estimation	PlotCalais01_/_Inclination - Percentage - Estimation - Inclination
taxonIdCalais068	Coarse sand content	39	Percentage	2008-10-21T09:26Z	sieving	PlotCalais01_/_Coarse sand content - Percentage - sieving - Coarse sand content
taxonIdCalais068	Fine sand content	34	Percentage	2008-10-21T09:26Z	sieving	PlotCalais01_/_Fine sand content - Percentage - sieving - Fine sand content
taxonIdCalais068	Silt content	15	Percentage	2008-10-21T09:26Z	sieving	PlotCalais01_/_Silt content - Percentage - sieving - Silt content
taxonIdCalais068	Clay content	12	Percentage	2008-10-21T09:26Z	sieving	PlotCalais01_/_Clay content - Percentage - sieving - Clay content
taxonIdCalais068	Soil acidity (pH)	5.12	nondimensional	2008-10-21T09:26Z	pH in water	PlotCalais01_/_Soil acidity (pH) - nondimensional - pH in water - Soil acidity (pH)
taxonIdCalais068	Availability of phosphorus	1.4	mg/dm3	2008-10-21T09:26Z	Extrator Mehlich 1	PlotCalais01_/_Availability of phosphorus - mg/dm3 - Extrator Mehlich 1 - Availability of phosphorus
taxonIdCalais068	Potassium availability	30	mg/dm3	2008-10-21T09:26Z	Extrator Mehlich 1	PlotCalais01_/_Potassium availability - mg/dm3 - Extrator Mehlich 1 - Potassium availability
taxonIdCalais068	Calcium availability	0.36	cmolc/dm3	2008-10-21T09:26Z	Extractor KCl 1mol/L	PlotCalais01_/_Calcium availability - cmolc/dm3 - Extractor KCl 1mol/L - Calcium availability
taxonIdCalais068	Magnesium availability	0.09	cmolc/dm3	2008-10-21T09:26Z	Extractor KCl 1mol/L	PlotCalais01_/_Magnesium availability - cmolc/dm3 - Extractor KCl 1mol/L - Magnesium availability
taxonIdCalais068	Aluminium avalaibility	1.18	cmolc/dm3	2008-10-21T09:26Z	Extractor KCl 1mol/L	PlotCalais01_/_Aluminium avalaibility - cmolc/dm3 - Extractor KCl 1mol/L - Aluminium avalaibility
taxonIdCalais068	Potential Acidity (H+AL)	4.6	cmolc/dm3	2008-10-21T09:26Z	Extractor Ca(CH3COO)2, 0.5mol/L, pH 7.0	PlotCalais01_/_Potential acidity (H+Al) - cmolc/dm3 - Extractor Ca(CH3COO)2, 0.5mol/L, pH 7.0 - Potential acidity (H+Al)
taxonIdCalais068	Interchangeable Bases	0.53	cmolc/dm3	2008-10-21T09:26Z	Interchangeable bases	PlotCalais01_/_Interchangeable bases - cmolc/dm3 - Interchangeable bases - Sum of Interchangeable bases
taxonIdCalais068	Effective cation exchange capacity	1.71	cmolc/dm3	2008-10-21T09:26Z	Effective cation exchange capacity	PlotCalais01_/_Effective cation exchange capacity - cmolc/dm3 - Effective cation exchange capacity - Effective cation exchange capacity
taxonIdCalais068	Cation exchange capacity at pH 7.0	5.13	cmolc/dm3	2008-10-21T09:26Z	Cation exchange capacity at pH 7.0	PlotCalais01_/_Cation exchange capacity at pH 7.0 - cmolc/dm3 - Cation exchange capacity at pH 7.0 - Cation exchange capacity at pH 7.0
taxonIdCalais068	Saturation of bases	10.3	Percentage	2008-10-21T09:26Z	Saturation of bases	PlotCalais01_/_Saturation of bases - Percentage - Saturation of bases - Saturation of bases
taxonIdCalais068	Saturation of aluminium	69	Percentage	2008-10-21T09:26Z	Saturation of aluminium	PlotCalais01_/_Saturation of aluminium - Percentage - Saturation of aluminium - Saturation of aluminium
taxonIdCalais068	Remaining phosphorus	37.8	mg/L	2008-10-21T09:26Z	Extraction with 0.01 mol/L CaCl2	PlotCalais01_/_Remaining phosphorus - mg/L - Remaining phosphorus - Remaining phosphorus
taxonIdCalais068	Rocky outcrops	10	Percentage	2008-10-21T09:26Z	Estimation	PlotCalais01_/_Rocky outcrops - Percentage - Estimation - Rocky outcrops
taxonIdCalais068	Inclination	3	Percentage	2008-10-21T09:26Z	Estimation	PlotCalais01_/_Inclination - Percentage - Estimation - Inclination
taxonIdCalais069	Coarse sand content	39	Percentage	2008-10-21T09:26Z	sieving	PlotCalais01_/_Coarse sand content - Percentage - sieving - Coarse sand content
taxonIdCalais069	Fine sand content	34	Percentage	2008-10-21T09:26Z	sieving	PlotCalais01_/_Fine sand content - Percentage - sieving - Fine sand content
taxonIdCalais069	Silt content	15	Percentage	2008-10-21T09:26Z	sieving	PlotCalais01_/_Silt content - Percentage - sieving - Silt content
taxonIdCalais069	Clay content	12	Percentage	2008-10-21T09:26Z	sieving	PlotCalais01_/_Clay content - Percentage - sieving - Clay content
taxonIdCalais069	Soil acidity (pH)	5.12	nondimensional	2008-10-21T09:26Z	pH in water	PlotCalais01_/_Soil acidity (pH) - nondimensional - pH in water - Soil acidity (pH)
taxonIdCalais069	Availability of phosphorus	1.4	mg/dm3	2008-10-21T09:26Z	Extrator Mehlich 1	PlotCalais01_/_Availability of phosphorus - mg/dm3 - Extrator Mehlich 1 - Availability of phosphorus
taxonIdCalais069	Potassium availability	30	mg/dm3	2008-10-21T09:26Z	Extrator Mehlich 1	PlotCalais01_/_Potassium availability - mg/dm3 - Extrator Mehlich 1 - Potassium availability
taxonIdCalais069	Calcium availability	0.36	cmolc/dm3	2008-10-21T09:26Z	Extractor KCl 1mol/L	PlotCalais01_/_Calcium availability - cmolc/dm3 - Extractor KCl 1mol/L - Calcium availability
taxonIdCalais069	Magnesium availability	0.09	cmolc/dm3	2008-10-21T09:26Z	Extractor KCl 1mol/L	PlotCalais01_/_Magnesium availability - cmolc/dm3 - Extractor KCl 1mol/L - Magnesium availability
taxonIdCalais069	Aluminium avalaibility	1.18	cmolc/dm3	2008-10-21T09:26Z	Extractor KCl 1mol/L	PlotCalais01_/_Aluminium avalaibility - cmolc/dm3 - Extractor KCl 1mol/L - Aluminium avalaibility
taxonIdCalais069	Potential Acidity (H+AL)	4.6	cmolc/dm3	2008-10-21T09:26Z	Extractor Ca(CH3COO)2, 0.5mol/L, pH 7.0	PlotCalais01_/_Potential acidity (H+Al) - cmolc/dm3 - Extractor Ca(CH3COO)2, 0.5mol/L, pH 7.0 - Potential acidity (H+Al)
taxonIdCalais069	Interchangeable Bases	0.53	cmolc/dm3	2008-10-21T09:26Z	Interchangeable bases	PlotCalais01_/_Interchangeable bases - cmolc/dm3 - Interchangeable bases - Sum of Interchangeable bases
taxonIdCalais069	Effective cation exchange capacity	1.71	cmolc/dm3	2008-10-21T09:26Z	Effective cation exchange capacity	PlotCalais01_/_Effective cation exchange capacity - cmolc/dm3 - Effective cation exchange capacity - Effective cation exchange capacity
taxonIdCalais069	Cation exchange capacity at pH 7.0	5.13	cmolc/dm3	2008-10-21T09:26Z	Cation exchange capacity at pH 7.0	PlotCalais01_/_Cation exchange capacity at pH 7.0 - cmolc/dm3 - Cation exchange capacity at pH 7.0 - Cation exchange capacity at pH 7.0
taxonIdCalais069	Saturation of bases	10.3	Percentage	2008-10-21T09:26Z	Saturation of bases	PlotCalais01_/_Saturation of bases - Percentage - Saturation of bases - Saturation of bases
taxonIdCalais069	Saturation of aluminium	69	Percentage	2008-10-21T09:26Z	Saturation of aluminium	PlotCalais01_/_Saturation of aluminium - Percentage - Saturation of aluminium - Saturation of aluminium
taxonIdCalais069	Remaining phosphorus	37.8	mg/L	2008-10-21T09:26Z	Extraction with 0.01 mol/L CaCl2	PlotCalais01_/_Remaining phosphorus - mg/L - Remaining phosphorus - Remaining phosphorus
taxonIdCalais069	Rocky outcrops	10	Percentage	2008-10-21T09:26Z	Estimation	PlotCalais01_/_Rocky outcrops - Percentage - Estimation - Rocky outcrops
taxonIdCalais069	Inclination	3	Percentage	2008-10-21T09:26Z	Estimation	PlotCalais01_/_Inclination - Percentage - Estimation - Inclination
taxonIdCalais074	Coarse sand content	39	Percentage	2008-10-21T09:26Z	sieving	PlotCalais01_/_Coarse sand content - Percentage - sieving - Coarse sand content
taxonIdCalais074	Fine sand content	34	Percentage	2008-10-21T09:26Z	sieving	PlotCalais01_/_Fine sand content - Percentage - sieving - Fine sand content
taxonIdCalais074	Silt content	15	Percentage	2008-10-21T09:26Z	sieving	PlotCalais01_/_Silt content - Percentage - sieving - Silt content
taxonIdCalais074	Clay content	12	Percentage	2008-10-21T09:26Z	sieving	PlotCalais01_/_Clay content - Percentage - sieving - Clay content
taxonIdCalais074	Soil acidity (pH)	5.12	nondimensional	2008-10-21T09:26Z	pH in water	PlotCalais01_/_Soil acidity (pH) - nondimensional - pH in water - Soil acidity (pH)
taxonIdCalais074	Availability of phosphorus	1.4	mg/dm3	2008-10-21T09:26Z	Extrator Mehlich 1	PlotCalais01_/_Availability of phosphorus - mg/dm3 - Extrator Mehlich 1 - Availability of phosphorus
taxonIdCalais074	Potassium availability	30	mg/dm3	2008-10-21T09:26Z	Extrator Mehlich 1	PlotCalais01_/_Potassium availability - mg/dm3 - Extrator Mehlich 1 - Potassium availability
taxonIdCalais074	Calcium availability	0.36	cmolc/dm3	2008-10-21T09:26Z	Extractor KCl 1mol/L	PlotCalais01_/_Calcium availability - cmolc/dm3 - Extractor KCl 1mol/L - Calcium availability
taxonIdCalais074	Magnesium availability	0.09	cmolc/dm3	2008-10-21T09:26Z	Extractor KCl 1mol/L	PlotCalais01_/_Magnesium availability - cmolc/dm3 - Extractor KCl 1mol/L - Magnesium availability
taxonIdCalais074	Aluminium avalaibility	1.18	cmolc/dm3	2008-10-21T09:26Z	Extractor KCl 1mol/L	PlotCalais01_/_Aluminium avalaibility - cmolc/dm3 - Extractor KCl 1mol/L - Aluminium avalaibility
taxonIdCalais074	Potential Acidity (H+AL)	4.6	cmolc/dm3	2008-10-21T09:26Z	Extractor Ca(CH3COO)2, 0.5mol/L, pH 7.0	PlotCalais01_/_Potential acidity (H+Al) - cmolc/dm3 - Extractor Ca(CH3COO)2, 0.5mol/L, pH 7.0 - Potential acidity (H+Al)
taxonIdCalais074	Interchangeable Bases	0.53	cmolc/dm3	2008-10-21T09:26Z	Interchangeable bases	PlotCalais01_/_Interchangeable bases - cmolc/dm3 - Interchangeable bases - Sum of Interchangeable bases
taxonIdCalais074	Effective cation exchange capacity	1.71	cmolc/dm3	2008-10-21T09:26Z	Effective cation exchange capacity	PlotCalais01_/_Effective cation exchange capacity - cmolc/dm3 - Effective cation exchange capacity - Effective cation exchange capacity
taxonIdCalais074	Cation exchange capacity at pH 7.0	5.13	cmolc/dm3	2008-10-21T09:26Z	Cation exchange capacity at pH 7.0	PlotCalais01_/_Cation exchange capacity at pH 7.0 - cmolc/dm3 - Cation exchange capacity at pH 7.0 - Cation exchange capacity at pH 7.0
taxonIdCalais074	Saturation of bases	10.3	Percentage	2008-10-21T09:26Z	Saturation of bases	PlotCalais01_/_Saturation of bases - Percentage - Saturation of bases - Saturation of bases
taxonIdCalais074	Saturation of aluminium	69	Percentage	2008-10-21T09:26Z	Saturation of aluminium	PlotCalais01_/_Saturation of aluminium - Percentage - Saturation of aluminium - Saturation of aluminium
taxonIdCalais074	Remaining phosphorus	37.8	mg/L	2008-10-21T09:26Z	Extraction with 0.01 mol/L CaCl2	PlotCalais01_/_Remaining phosphorus - mg/L - Remaining phosphorus - Remaining phosphorus
taxonIdCalais074	Rocky outcrops	10	Percentage	2008-10-21T09:26Z	Estimation	PlotCalais01_/_Rocky outcrops - Percentage - Estimation - Rocky outcrops
taxonIdCalais074	Inclination	3	Percentage	2008-10-21T09:26Z	Estimation	PlotCalais01_/_Inclination - Percentage - Estimation - Inclination
taxonIdCalais076	Coarse sand content	39	Percentage	2008-10-21T09:26Z	sieving	PlotCalais01_/_Coarse sand content - Percentage - sieving - Coarse sand content
taxonIdCalais076	Fine sand content	34	Percentage	2008-10-21T09:26Z	sieving	PlotCalais01_/_Fine sand content - Percentage - sieving - Fine sand content
taxonIdCalais076	Silt content	15	Percentage	2008-10-21T09:26Z	sieving	PlotCalais01_/_Silt content - Percentage - sieving - Silt content
taxonIdCalais076	Clay content	12	Percentage	2008-10-21T09:26Z	sieving	PlotCalais01_/_Clay content - Percentage - sieving - Clay content
taxonIdCalais076	Soil acidity (pH)	5.12	nondimensional	2008-10-21T09:26Z	pH in water	PlotCalais01_/_Soil acidity (pH) - nondimensional - pH in water - Soil acidity (pH)
taxonIdCalais076	Availability of phosphorus	1.4	mg/dm3	2008-10-21T09:26Z	Extrator Mehlich 1	PlotCalais01_/_Availability of phosphorus - mg/dm3 - Extrator Mehlich 1 - Availability of phosphorus
taxonIdCalais076	Potassium availability	30	mg/dm3	2008-10-21T09:26Z	Extrator Mehlich 1	PlotCalais01_/_Potassium availability - mg/dm3 - Extrator Mehlich 1 - Potassium availability
taxonIdCalais076	Calcium availability	0.36	cmolc/dm3	2008-10-21T09:26Z	Extractor KCl 1mol/L	PlotCalais01_/_Calcium availability - cmolc/dm3 - Extractor KCl 1mol/L - Calcium availability
taxonIdCalais076	Magnesium availability	0.09	cmolc/dm3	2008-10-21T09:26Z	Extractor KCl 1mol/L	PlotCalais01_/_Magnesium availability - cmolc/dm3 - Extractor KCl 1mol/L - Magnesium availability
taxonIdCalais076	Aluminium avalaibility	1.18	cmolc/dm3	2008-10-21T09:26Z	Extractor KCl 1mol/L	PlotCalais01_/_Aluminium avalaibility - cmolc/dm3 - Extractor KCl 1mol/L - Aluminium avalaibility
taxonIdCalais076	Potential Acidity (H+AL)	4.6	cmolc/dm3	2008-10-21T09:26Z	Extractor Ca(CH3COO)2, 0.5mol/L, pH 7.0	PlotCalais01_/_Potential acidity (H+Al) - cmolc/dm3 - Extractor Ca(CH3COO)2, 0.5mol/L, pH 7.0 - Potential acidity (H+Al)
taxonIdCalais076	Interchangeable Bases	0.53	cmolc/dm3	2008-10-21T09:26Z	Interchangeable bases	PlotCalais01_/_Interchangeable bases - cmolc/dm3 - Interchangeable bases - Sum of Interchangeable bases
taxonIdCalais076	Effective cation exchange capacity	1.71	cmolc/dm3	2008-10-21T09:26Z	Effective cation exchange capacity	PlotCalais01_/_Effective cation exchange capacity - cmolc/dm3 - Effective cation exchange capacity - Effective cation exchange capacity
taxonIdCalais076	Cation exchange capacity at pH 7.0	5.13	cmolc/dm3	2008-10-21T09:26Z	Cation exchange capacity at pH 7.0	PlotCalais01_/_Cation exchange capacity at pH 7.0 - cmolc/dm3 - Cation exchange capacity at pH 7.0 - Cation exchange capacity at pH 7.0
taxonIdCalais076	Saturation of bases	10.3	Percentage	2008-10-21T09:26Z	Saturation of bases	PlotCalais01_/_Saturation of bases - Percentage - Saturation of bases - Saturation of bases
taxonIdCalais076	Saturation of aluminium	69	Percentage	2008-10-21T09:26Z	Saturation of aluminium	PlotCalais01_/_Saturation of aluminium - Percentage - Saturation of aluminium - Saturation of aluminium
taxonIdCalais076	Remaining phosphorus	37.8	mg/L	2008-10-21T09:26Z	Extraction with 0.01 mol/L CaCl2	PlotCalais01_/_Remaining phosphorus - mg/L - Remaining phosphorus - Remaining phosphorus
taxonIdCalais076	Rocky outcrops	10	Percentage	2008-10-21T09:26Z	Estimation	PlotCalais01_/_Rocky outcrops - Percentage - Estimation - Rocky outcrops
taxonIdCalais076	Inclination	3	Percentage	2008-10-21T09:26Z	Estimation	PlotCalais01_/_Inclination - Percentage - Estimation - Inclination
taxonIdCalais077	Coarse sand content	39	Percentage	2008-10-21T09:26Z	sieving	PlotCalais01_/_Coarse sand content - Percentage - sieving - Coarse sand content
taxonIdCalais077	Fine sand content	34	Percentage	2008-10-21T09:26Z	sieving	PlotCalais01_/_Fine sand content - Percentage - sieving - Fine sand content
taxonIdCalais077	Silt content	15	Percentage	2008-10-21T09:26Z	sieving	PlotCalais01_/_Silt content - Percentage - sieving - Silt content
taxonIdCalais077	Clay content	12	Percentage	2008-10-21T09:26Z	sieving	PlotCalais01_/_Clay content - Percentage - sieving - Clay content
taxonIdCalais077	Soil acidity (pH)	5.12	nondimensional	2008-10-21T09:26Z	pH in water	PlotCalais01_/_Soil acidity (pH) - nondimensional - pH in water - Soil acidity (pH)
taxonIdCalais077	Availability of phosphorus	1.4	mg/dm3	2008-10-21T09:26Z	Extrator Mehlich 1	PlotCalais01_/_Availability of phosphorus - mg/dm3 - Extrator Mehlich 1 - Availability of phosphorus
taxonIdCalais077	Potassium availability	30	mg/dm3	2008-10-21T09:26Z	Extrator Mehlich 1	PlotCalais01_/_Potassium availability - mg/dm3 - Extrator Mehlich 1 - Potassium availability
taxonIdCalais077	Calcium availability	0.36	cmolc/dm3	2008-10-21T09:26Z	Extractor KCl 1mol/L	PlotCalais01_/_Calcium availability - cmolc/dm3 - Extractor KCl 1mol/L - Calcium availability
taxonIdCalais077	Magnesium availability	0.09	cmolc/dm3	2008-10-21T09:26Z	Extractor KCl 1mol/L	PlotCalais01_/_Magnesium availability - cmolc/dm3 - Extractor KCl 1mol/L - Magnesium availability
taxonIdCalais077	Aluminium avalaibility	1.18	cmolc/dm3	2008-10-21T09:26Z	Extractor KCl 1mol/L	PlotCalais01_/_Aluminium avalaibility - cmolc/dm3 - Extractor KCl 1mol/L - Aluminium avalaibility
taxonIdCalais077	Potential Acidity (H+AL)	4.6	cmolc/dm3	2008-10-21T09:26Z	Extractor Ca(CH3COO)2, 0.5mol/L, pH 7.0	PlotCalais01_/_Potential acidity (H+Al) - cmolc/dm3 - Extractor Ca(CH3COO)2, 0.5mol/L, pH 7.0 - Potential acidity (H+Al)
taxonIdCalais077	Interchangeable Bases	0.53	cmolc/dm3	2008-10-21T09:26Z	Interchangeable bases	PlotCalais01_/_Interchangeable bases - cmolc/dm3 - Interchangeable bases - Sum of Interchangeable bases
taxonIdCalais077	Effective cation exchange capacity	1.71	cmolc/dm3	2008-10-21T09:26Z	Effective cation exchange capacity	PlotCalais01_/_Effective cation exchange capacity - cmolc/dm3 - Effective cation exchange capacity - Effective cation exchange capacity
taxonIdCalais077	Cation exchange capacity at pH 7.0	5.13	cmolc/dm3	2008-10-21T09:26Z	Cation exchange capacity at pH 7.0	PlotCalais01_/_Cation exchange capacity at pH 7.0 - cmolc/dm3 - Cation exchange capacity at pH 7.0 - Cation exchange capacity at pH 7.0
taxonIdCalais077	Saturation of bases	10.3	Percentage	2008-10-21T09:26Z	Saturation of bases	PlotCalais01_/_Saturation of bases - Percentage - Saturation of bases - Saturation of bases
taxonIdCalais077	Saturation of aluminium	69	Percentage	2008-10-21T09:26Z	Saturation of aluminium	PlotCalais01_/_Saturation of aluminium - Percentage - Saturation of aluminium - Saturation of aluminium
taxonIdCalais077	Remaining phosphorus	37.8	mg/L	2008-10-21T09:26Z	Extraction with 0.01 mol/L CaCl2	PlotCalais01_/_Remaining phosphorus - mg/L - Remaining phosphorus - Remaining phosphorus
taxonIdCalais077	Rocky outcrops	10	Percentage	2008-10-21T09:26Z	Estimation	PlotCalais01_/_Rocky outcrops - Percentage - Estimation - Rocky outcrops
taxonIdCalais077	Inclination	3	Percentage	2008-10-21T09:26Z	Estimation	PlotCalais01_/_Inclination - Percentage - Estimation - Inclination
taxonIdCalais078	Coarse sand content	39	Percentage	2008-10-21T09:26Z	sieving	PlotCalais01_/_Coarse sand content - Percentage - sieving - Coarse sand content
taxonIdCalais078	Fine sand content	34	Percentage	2008-10-21T09:26Z	sieving	PlotCalais01_/_Fine sand content - Percentage - sieving - Fine sand content
taxonIdCalais078	Silt content	15	Percentage	2008-10-21T09:26Z	sieving	PlotCalais01_/_Silt content - Percentage - sieving - Silt content
taxonIdCalais078	Clay content	12	Percentage	2008-10-21T09:26Z	sieving	PlotCalais01_/_Clay content - Percentage - sieving - Clay content
taxonIdCalais078	Soil acidity (pH)	5.12	nondimensional	2008-10-21T09:26Z	pH in water	PlotCalais01_/_Soil acidity (pH) - nondimensional - pH in water - Soil acidity (pH)
taxonIdCalais078	Availability of phosphorus	1.4	mg/dm3	2008-10-21T09:26Z	Extrator Mehlich 1	PlotCalais01_/_Availability of phosphorus - mg/dm3 - Extrator Mehlich 1 - Availability of phosphorus
taxonIdCalais078	Potassium availability	30	mg/dm3	2008-10-21T09:26Z	Extrator Mehlich 1	PlotCalais01_/_Potassium availability - mg/dm3 - Extrator Mehlich 1 - Potassium availability
taxonIdCalais078	Calcium availability	0.36	cmolc/dm3	2008-10-21T09:26Z	Extractor KCl 1mol/L	PlotCalais01_/_Calcium availability - cmolc/dm3 - Extractor KCl 1mol/L - Calcium availability
taxonIdCalais078	Magnesium availability	0.09	cmolc/dm3	2008-10-21T09:26Z	Extractor KCl 1mol/L	PlotCalais01_/_Magnesium availability - cmolc/dm3 - Extractor KCl 1mol/L - Magnesium availability
taxonIdCalais078	Aluminium avalaibility	1.18	cmolc/dm3	2008-10-21T09:26Z	Extractor KCl 1mol/L	PlotCalais01_/_Aluminium avalaibility - cmolc/dm3 - Extractor KCl 1mol/L - Aluminium avalaibility
taxonIdCalais078	Potential Acidity (H+AL)	4.6	cmolc/dm3	2008-10-21T09:26Z	Extractor Ca(CH3COO)2, 0.5mol/L, pH 7.0	PlotCalais01_/_Potential acidity (H+Al) - cmolc/dm3 - Extractor Ca(CH3COO)2, 0.5mol/L, pH 7.0 - Potential acidity (H+Al)
taxonIdCalais078	Interchangeable Bases	0.53	cmolc/dm3	2008-10-21T09:26Z	Interchangeable bases	PlotCalais01_/_Interchangeable bases - cmolc/dm3 - Interchangeable bases - Sum of Interchangeable bases
taxonIdCalais078	Effective cation exchange capacity	1.71	cmolc/dm3	2008-10-21T09:26Z	Effective cation exchange capacity	PlotCalais01_/_Effective cation exchange capacity - cmolc/dm3 - Effective cation exchange capacity - Effective cation exchange capacity
taxonIdCalais078	Cation exchange capacity at pH 7.0	5.13	cmolc/dm3	2008-10-21T09:26Z	Cation exchange capacity at pH 7.0	PlotCalais01_/_Cation exchange capacity at pH 7.0 - cmolc/dm3 - Cation exchange capacity at pH 7.0 - Cation exchange capacity at pH 7.0
taxonIdCalais078	Saturation of bases	10.3	Percentage	2008-10-21T09:26Z	Saturation of bases	PlotCalais01_/_Saturation of bases - Percentage - Saturation of bases - Saturation of bases
taxonIdCalais078	Saturation of aluminium	69	Percentage	2008-10-21T09:26Z	Saturation of aluminium	PlotCalais01_/_Saturation of aluminium - Percentage - Saturation of aluminium - Saturation of aluminium
taxonIdCalais078	Remaining phosphorus	37.8	mg/L	2008-10-21T09:26Z	Extraction with 0.01 mol/L CaCl2	PlotCalais01_/_Remaining phosphorus - mg/L - Remaining phosphorus - Remaining phosphorus
taxonIdCalais078	Rocky outcrops	10	Percentage	2008-10-21T09:26Z	Estimation	PlotCalais01_/_Rocky outcrops - Percentage - Estimation - Rocky outcrops
taxonIdCalais078	Inclination	3	Percentage	2008-10-21T09:26Z	Estimation	PlotCalais01_/_Inclination - Percentage - Estimation - Inclination
taxonIdCalais079	Coarse sand content	39	Percentage	2008-10-21T09:26Z	sieving	PlotCalais01_/_Coarse sand content - Percentage - sieving - Coarse sand content
taxonIdCalais079	Fine sand content	34	Percentage	2008-10-21T09:26Z	sieving	PlotCalais01_/_Fine sand content - Percentage - sieving - Fine sand content
taxonIdCalais079	Silt content	15	Percentage	2008-10-21T09:26Z	sieving	PlotCalais01_/_Silt content - Percentage - sieving - Silt content
taxonIdCalais079	Clay content	12	Percentage	2008-10-21T09:26Z	sieving	PlotCalais01_/_Clay content - Percentage - sieving - Clay content
taxonIdCalais079	Soil acidity (pH)	5.12	nondimensional	2008-10-21T09:26Z	pH in water	PlotCalais01_/_Soil acidity (pH) - nondimensional - pH in water - Soil acidity (pH)
taxonIdCalais079	Availability of phosphorus	1.4	mg/dm3	2008-10-21T09:26Z	Extrator Mehlich 1	PlotCalais01_/_Availability of phosphorus - mg/dm3 - Extrator Mehlich 1 - Availability of phosphorus
taxonIdCalais079	Potassium availability	30	mg/dm3	2008-10-21T09:26Z	Extrator Mehlich 1	PlotCalais01_/_Potassium availability - mg/dm3 - Extrator Mehlich 1 - Potassium availability
taxonIdCalais079	Calcium availability	0.36	cmolc/dm3	2008-10-21T09:26Z	Extractor KCl 1mol/L	PlotCalais01_/_Calcium availability - cmolc/dm3 - Extractor KCl 1mol/L - Calcium availability
taxonIdCalais079	Magnesium availability	0.09	cmolc/dm3	2008-10-21T09:26Z	Extractor KCl 1mol/L	PlotCalais01_/_Magnesium availability - cmolc/dm3 - Extractor KCl 1mol/L - Magnesium availability
taxonIdCalais079	Aluminium avalaibility	1.18	cmolc/dm3	2008-10-21T09:26Z	Extractor KCl 1mol/L	PlotCalais01_/_Aluminium avalaibility - cmolc/dm3 - Extractor KCl 1mol/L - Aluminium avalaibility
taxonIdCalais079	Potential Acidity (H+AL)	4.6	cmolc/dm3	2008-10-21T09:26Z	Extractor Ca(CH3COO)2, 0.5mol/L, pH 7.0	PlotCalais01_/_Potential acidity (H+Al) - cmolc/dm3 - Extractor Ca(CH3COO)2, 0.5mol/L, pH 7.0 - Potential acidity (H+Al)
taxonIdCalais079	Interchangeable Bases	0.53	cmolc/dm3	2008-10-21T09:26Z	Interchangeable bases	PlotCalais01_/_Interchangeable bases - cmolc/dm3 - Interchangeable bases - Sum of Interchangeable bases
taxonIdCalais079	Effective cation exchange capacity	1.71	cmolc/dm3	2008-10-21T09:26Z	Effective cation exchange capacity	PlotCalais01_/_Effective cation exchange capacity - cmolc/dm3 - Effective cation exchange capacity - Effective cation exchange capacity
taxonIdCalais079	Cation exchange capacity at pH 7.0	5.13	cmolc/dm3	2008-10-21T09:26Z	Cation exchange capacity at pH 7.0	PlotCalais01_/_Cation exchange capacity at pH 7.0 - cmolc/dm3 - Cation exchange capacity at pH 7.0 - Cation exchange capacity at pH 7.0
taxonIdCalais079	Saturation of bases	10.3	Percentage	2008-10-21T09:26Z	Saturation of bases	PlotCalais01_/_Saturation of bases - Percentage - Saturation of bases - Saturation of bases
taxonIdCalais079	Saturation of aluminium	69	Percentage	2008-10-21T09:26Z	Saturation of aluminium	PlotCalais01_/_Saturation of aluminium - Percentage - Saturation of aluminium - Saturation of aluminium
taxonIdCalais079	Remaining phosphorus	37.8	mg/L	2008-10-21T09:26Z	Extraction with 0.01 mol/L CaCl2	PlotCalais01_/_Remaining phosphorus - mg/L - Remaining phosphorus - Remaining phosphorus
taxonIdCalais079	Rocky outcrops	10	Percentage	2008-10-21T09:26Z	Estimation	PlotCalais01_/_Rocky outcrops - Percentage - Estimation - Rocky outcrops
taxonIdCalais079	Inclination	3	Percentage	2008-10-21T09:26Z	Estimation	PlotCalais01_/_Inclination - Percentage - Estimation - Inclination
taxonIdCalais081	Coarse sand content	39	Percentage	2008-10-21T09:26Z	sieving	PlotCalais01_/_Coarse sand content - Percentage - sieving - Coarse sand content
taxonIdCalais081	Fine sand content	34	Percentage	2008-10-21T09:26Z	sieving	PlotCalais01_/_Fine sand content - Percentage - sieving - Fine sand content
taxonIdCalais081	Silt content	15	Percentage	2008-10-21T09:26Z	sieving	PlotCalais01_/_Silt content - Percentage - sieving - Silt content
taxonIdCalais081	Clay content	12	Percentage	2008-10-21T09:26Z	sieving	PlotCalais01_/_Clay content - Percentage - sieving - Clay content
taxonIdCalais081	Soil acidity (pH)	5.12	nondimensional	2008-10-21T09:26Z	pH in water	PlotCalais01_/_Soil acidity (pH) - nondimensional - pH in water - Soil acidity (pH)
taxonIdCalais081	Availability of phosphorus	1.4	mg/dm3	2008-10-21T09:26Z	Extrator Mehlich 1	PlotCalais01_/_Availability of phosphorus - mg/dm3 - Extrator Mehlich 1 - Availability of phosphorus
taxonIdCalais081	Potassium availability	30	mg/dm3	2008-10-21T09:26Z	Extrator Mehlich 1	PlotCalais01_/_Potassium availability - mg/dm3 - Extrator Mehlich 1 - Potassium availability
taxonIdCalais081	Calcium availability	0.36	cmolc/dm3	2008-10-21T09:26Z	Extractor KCl 1mol/L	PlotCalais01_/_Calcium availability - cmolc/dm3 - Extractor KCl 1mol/L - Calcium availability
taxonIdCalais081	Magnesium availability	0.09	cmolc/dm3	2008-10-21T09:26Z	Extractor KCl 1mol/L	PlotCalais01_/_Magnesium availability - cmolc/dm3 - Extractor KCl 1mol/L - Magnesium availability
taxonIdCalais081	Aluminium avalaibility	1.18	cmolc/dm3	2008-10-21T09:26Z	Extractor KCl 1mol/L	PlotCalais01_/_Aluminium avalaibility - cmolc/dm3 - Extractor KCl 1mol/L - Aluminium avalaibility
taxonIdCalais081	Potential Acidity (H+AL)	4.6	cmolc/dm3	2008-10-21T09:26Z	Extractor Ca(CH3COO)2, 0.5mol/L, pH 7.0	PlotCalais01_/_Potential acidity (H+Al) - cmolc/dm3 - Extractor Ca(CH3COO)2, 0.5mol/L, pH 7.0 - Potential acidity (H+Al)
taxonIdCalais081	Interchangeable Bases	0.53	cmolc/dm3	2008-10-21T09:26Z	Interchangeable bases	PlotCalais01_/_Interchangeable bases - cmolc/dm3 - Interchangeable bases - Sum of Interchangeable bases
taxonIdCalais081	Effective cation exchange capacity	1.71	cmolc/dm3	2008-10-21T09:26Z	Effective cation exchange capacity	PlotCalais01_/_Effective cation exchange capacity - cmolc/dm3 - Effective cation exchange capacity - Effective cation exchange capacity
taxonIdCalais081	Cation exchange capacity at pH 7.0	5.13	cmolc/dm3	2008-10-21T09:26Z	Cation exchange capacity at pH 7.0	PlotCalais01_/_Cation exchange capacity at pH 7.0 - cmolc/dm3 - Cation exchange capacity at pH 7.0 - Cation exchange capacity at pH 7.0
taxonIdCalais081	Saturation of bases	10.3	Percentage	2008-10-21T09:26Z	Saturation of bases	PlotCalais01_/_Saturation of bases - Percentage - Saturation of bases - Saturation of bases
taxonIdCalais081	Saturation of aluminium	69	Percentage	2008-10-21T09:26Z	Saturation of aluminium	PlotCalais01_/_Saturation of aluminium - Percentage - Saturation of aluminium - Saturation of aluminium
taxonIdCalais081	Remaining phosphorus	37.8	mg/L	2008-10-21T09:26Z	Extraction with 0.01 mol/L CaCl2	PlotCalais01_/_Remaining phosphorus - mg/L - Remaining phosphorus - Remaining phosphorus
taxonIdCalais081	Rocky outcrops	10	Percentage	2008-10-21T09:26Z	Estimation	PlotCalais01_/_Rocky outcrops - Percentage - Estimation - Rocky outcrops
taxonIdCalais081	Inclination	3	Percentage	2008-10-21T09:26Z	Estimation	PlotCalais01_/_Inclination - Percentage - Estimation - Inclination
taxonIdCalais083	Coarse sand content	39	Percentage	2008-10-21T09:26Z	sieving	PlotCalais01_/_Coarse sand content - Percentage - sieving - Coarse sand content
taxonIdCalais083	Fine sand content	34	Percentage	2008-10-21T09:26Z	sieving	PlotCalais01_/_Fine sand content - Percentage - sieving - Fine sand content
taxonIdCalais083	Silt content	15	Percentage	2008-10-21T09:26Z	sieving	PlotCalais01_/_Silt content - Percentage - sieving - Silt content
taxonIdCalais083	Clay content	12	Percentage	2008-10-21T09:26Z	sieving	PlotCalais01_/_Clay content - Percentage - sieving - Clay content
taxonIdCalais083	Soil acidity (pH)	5.12	nondimensional	2008-10-21T09:26Z	pH in water	PlotCalais01_/_Soil acidity (pH) - nondimensional - pH in water - Soil acidity (pH)
taxonIdCalais083	Availability of phosphorus	1.4	mg/dm3	2008-10-21T09:26Z	Extrator Mehlich 1	PlotCalais01_/_Availability of phosphorus - mg/dm3 - Extrator Mehlich 1 - Availability of phosphorus
taxonIdCalais083	Potassium availability	30	mg/dm3	2008-10-21T09:26Z	Extrator Mehlich 1	PlotCalais01_/_Potassium availability - mg/dm3 - Extrator Mehlich 1 - Potassium availability
taxonIdCalais083	Calcium availability	0.36	cmolc/dm3	2008-10-21T09:26Z	Extractor KCl 1mol/L	PlotCalais01_/_Calcium availability - cmolc/dm3 - Extractor KCl 1mol/L - Calcium availability
taxonIdCalais083	Magnesium availability	0.09	cmolc/dm3	2008-10-21T09:26Z	Extractor KCl 1mol/L	PlotCalais01_/_Magnesium availability - cmolc/dm3 - Extractor KCl 1mol/L - Magnesium availability
taxonIdCalais083	Aluminium avalaibility	1.18	cmolc/dm3	2008-10-21T09:26Z	Extractor KCl 1mol/L	PlotCalais01_/_Aluminium avalaibility - cmolc/dm3 - Extractor KCl 1mol/L - Aluminium avalaibility
taxonIdCalais083	Potential Acidity (H+AL)	4.6	cmolc/dm3	2008-10-21T09:26Z	Extractor Ca(CH3COO)2, 0.5mol/L, pH 7.0	PlotCalais01_/_Potential acidity (H+Al) - cmolc/dm3 - Extractor Ca(CH3COO)2, 0.5mol/L, pH 7.0 - Potential acidity (H+Al)
taxonIdCalais083	Interchangeable Bases	0.53	cmolc/dm3	2008-10-21T09:26Z	Interchangeable bases	PlotCalais01_/_Interchangeable bases - cmolc/dm3 - Interchangeable bases - Sum of Interchangeable bases
taxonIdCalais083	Effective cation exchange capacity	1.71	cmolc/dm3	2008-10-21T09:26Z	Effective cation exchange capacity	PlotCalais01_/_Effective cation exchange capacity - cmolc/dm3 - Effective cation exchange capacity - Effective cation exchange capacity
taxonIdCalais083	Cation exchange capacity at pH 7.0	5.13	cmolc/dm3	2008-10-21T09:26Z	Cation exchange capacity at pH 7.0	PlotCalais01_/_Cation exchange capacity at pH 7.0 - cmolc/dm3 - Cation exchange capacity at pH 7.0 - Cation exchange capacity at pH 7.0
taxonIdCalais083	Saturation of bases	10.3	Percentage	2008-10-21T09:26Z	Saturation of bases	PlotCalais01_/_Saturation of bases - Percentage - Saturation of bases - Saturation of bases
taxonIdCalais083	Saturation of aluminium	69	Percentage	2008-10-21T09:26Z	Saturation of aluminium	PlotCalais01_/_Saturation of aluminium - Percentage - Saturation of aluminium - Saturation of aluminium
taxonIdCalais083	Remaining phosphorus	37.8	mg/L	2008-10-21T09:26Z	Extraction with 0.01 mol/L CaCl2	PlotCalais01_/_Remaining phosphorus - mg/L - Remaining phosphorus - Remaining phosphorus
taxonIdCalais083	Rocky outcrops	10	Percentage	2008-10-21T09:26Z	Estimation	PlotCalais01_/_Rocky outcrops - Percentage - Estimation - Rocky outcrops
taxonIdCalais083	Inclination	3	Percentage	2008-10-21T09:26Z	Estimation	PlotCalais01_/_Inclination - Percentage - Estimation - Inclination
taxonIdCalais084	Coarse sand content	39	Percentage	2008-10-21T09:26Z	sieving	PlotCalais01_/_Coarse sand content - Percentage - sieving - Coarse sand content
taxonIdCalais084	Fine sand content	34	Percentage	2008-10-21T09:26Z	sieving	PlotCalais01_/_Fine sand content - Percentage - sieving - Fine sand content
taxonIdCalais084	Silt content	15	Percentage	2008-10-21T09:26Z	sieving	PlotCalais01_/_Silt content - Percentage - sieving - Silt content
taxonIdCalais084	Clay content	12	Percentage	2008-10-21T09:26Z	sieving	PlotCalais01_/_Clay content - Percentage - sieving - Clay content
taxonIdCalais084	Soil acidity (pH)	5.12	nondimensional	2008-10-21T09:26Z	pH in water	PlotCalais01_/_Soil acidity (pH) - nondimensional - pH in water - Soil acidity (pH)
taxonIdCalais084	Availability of phosphorus	1.4	mg/dm3	2008-10-21T09:26Z	Extrator Mehlich 1	PlotCalais01_/_Availability of phosphorus - mg/dm3 - Extrator Mehlich 1 - Availability of phosphorus
taxonIdCalais084	Potassium availability	30	mg/dm3	2008-10-21T09:26Z	Extrator Mehlich 1	PlotCalais01_/_Potassium availability - mg/dm3 - Extrator Mehlich 1 - Potassium availability
taxonIdCalais084	Calcium availability	0.36	cmolc/dm3	2008-10-21T09:26Z	Extractor KCl 1mol/L	PlotCalais01_/_Calcium availability - cmolc/dm3 - Extractor KCl 1mol/L - Calcium availability
taxonIdCalais084	Magnesium availability	0.09	cmolc/dm3	2008-10-21T09:26Z	Extractor KCl 1mol/L	PlotCalais01_/_Magnesium availability - cmolc/dm3 - Extractor KCl 1mol/L - Magnesium availability
taxonIdCalais084	Aluminium avalaibility	1.18	cmolc/dm3	2008-10-21T09:26Z	Extractor KCl 1mol/L	PlotCalais01_/_Aluminium avalaibility - cmolc/dm3 - Extractor KCl 1mol/L - Aluminium avalaibility
taxonIdCalais084	Potential Acidity (H+AL)	4.6	cmolc/dm3	2008-10-21T09:26Z	Extractor Ca(CH3COO)2, 0.5mol/L, pH 7.0	PlotCalais01_/_Potential acidity (H+Al) - cmolc/dm3 - Extractor Ca(CH3COO)2, 0.5mol/L, pH 7.0 - Potential acidity (H+Al)
taxonIdCalais084	Interchangeable Bases	0.53	cmolc/dm3	2008-10-21T09:26Z	Interchangeable bases	PlotCalais01_/_Interchangeable bases - cmolc/dm3 - Interchangeable bases - Sum of Interchangeable bases
taxonIdCalais084	Effective cation exchange capacity	1.71	cmolc/dm3	2008-10-21T09:26Z	Effective cation exchange capacity	PlotCalais01_/_Effective cation exchange capacity - cmolc/dm3 - Effective cation exchange capacity - Effective cation exchange capacity
taxonIdCalais084	Cation exchange capacity at pH 7.0	5.13	cmolc/dm3	2008-10-21T09:26Z	Cation exchange capacity at pH 7.0	PlotCalais01_/_Cation exchange capacity at pH 7.0 - cmolc/dm3 - Cation exchange capacity at pH 7.0 - Cation exchange capacity at pH 7.0
taxonIdCalais084	Saturation of bases	10.3	Percentage	2008-10-21T09:26Z	Saturation of bases	PlotCalais01_/_Saturation of bases - Percentage - Saturation of bases - Saturation of bases
taxonIdCalais084	Saturation of aluminium	69	Percentage	2008-10-21T09:26Z	Saturation of aluminium	PlotCalais01_/_Saturation of aluminium - Percentage - Saturation of aluminium - Saturation of aluminium
taxonIdCalais084	Remaining phosphorus	37.8	mg/L	2008-10-21T09:26Z	Extraction with 0.01 mol/L CaCl2	PlotCalais01_/_Remaining phosphorus - mg/L - Remaining phosphorus - Remaining phosphorus
taxonIdCalais084	Rocky outcrops	10	Percentage	2008-10-21T09:26Z	Estimation	PlotCalais01_/_Rocky outcrops - Percentage - Estimation - Rocky outcrops
taxonIdCalais084	Inclination	3	Percentage	2008-10-21T09:26Z	Estimation	PlotCalais01_/_Inclination - Percentage - Estimation - Inclination
taxonIdCalais087	Coarse sand content	39	Percentage	2008-10-21T09:26Z	sieving	PlotCalais01_/_Coarse sand content - Percentage - sieving - Coarse sand content
taxonIdCalais087	Fine sand content	34	Percentage	2008-10-21T09:26Z	sieving	PlotCalais01_/_Fine sand content - Percentage - sieving - Fine sand content
taxonIdCalais087	Silt content	15	Percentage	2008-10-21T09:26Z	sieving	PlotCalais01_/_Silt content - Percentage - sieving - Silt content
taxonIdCalais087	Clay content	12	Percentage	2008-10-21T09:26Z	sieving	PlotCalais01_/_Clay content - Percentage - sieving - Clay content
taxonIdCalais087	Soil acidity (pH)	5.12	nondimensional	2008-10-21T09:26Z	pH in water	PlotCalais01_/_Soil acidity (pH) - nondimensional - pH in water - Soil acidity (pH)
taxonIdCalais087	Availability of phosphorus	1.4	mg/dm3	2008-10-21T09:26Z	Extrator Mehlich 1	PlotCalais01_/_Availability of phosphorus - mg/dm3 - Extrator Mehlich 1 - Availability of phosphorus
taxonIdCalais087	Potassium availability	30	mg/dm3	2008-10-21T09:26Z	Extrator Mehlich 1	PlotCalais01_/_Potassium availability - mg/dm3 - Extrator Mehlich 1 - Potassium availability
taxonIdCalais087	Calcium availability	0.36	cmolc/dm3	2008-10-21T09:26Z	Extractor KCl 1mol/L	PlotCalais01_/_Calcium availability - cmolc/dm3 - Extractor KCl 1mol/L - Calcium availability
taxonIdCalais087	Magnesium availability	0.09	cmolc/dm3	2008-10-21T09:26Z	Extractor KCl 1mol/L	PlotCalais01_/_Magnesium availability - cmolc/dm3 - Extractor KCl 1mol/L - Magnesium availability
taxonIdCalais087	Aluminium avalaibility	1.18	cmolc/dm3	2008-10-21T09:26Z	Extractor KCl 1mol/L	PlotCalais01_/_Aluminium avalaibility - cmolc/dm3 - Extractor KCl 1mol/L - Aluminium avalaibility
taxonIdCalais087	Potential Acidity (H+AL)	4.6	cmolc/dm3	2008-10-21T09:26Z	Extractor Ca(CH3COO)2, 0.5mol/L, pH 7.0	PlotCalais01_/_Potential acidity (H+Al) - cmolc/dm3 - Extractor Ca(CH3COO)2, 0.5mol/L, pH 7.0 - Potential acidity (H+Al)
taxonIdCalais087	Interchangeable Bases	0.53	cmolc/dm3	2008-10-21T09:26Z	Interchangeable bases	PlotCalais01_/_Interchangeable bases - cmolc/dm3 - Interchangeable bases - Sum of Interchangeable bases
taxonIdCalais087	Effective cation exchange capacity	1.71	cmolc/dm3	2008-10-21T09:26Z	Effective cation exchange capacity	PlotCalais01_/_Effective cation exchange capacity - cmolc/dm3 - Effective cation exchange capacity - Effective cation exchange capacity
taxonIdCalais087	Cation exchange capacity at pH 7.0	5.13	cmolc/dm3	2008-10-21T09:26Z	Cation exchange capacity at pH 7.0	PlotCalais01_/_Cation exchange capacity at pH 7.0 - cmolc/dm3 - Cation exchange capacity at pH 7.0 - Cation exchange capacity at pH 7.0
taxonIdCalais087	Saturation of bases	10.3	Percentage	2008-10-21T09:26Z	Saturation of bases	PlotCalais01_/_Saturation of bases - Percentage - Saturation of bases - Saturation of bases
taxonIdCalais087	Saturation of aluminium	69	Percentage	2008-10-21T09:26Z	Saturation of aluminium	PlotCalais01_/_Saturation of aluminium - Percentage - Saturation of aluminium - Saturation of aluminium
taxonIdCalais087	Remaining phosphorus	37.8	mg/L	2008-10-21T09:26Z	Extraction with 0.01 mol/L CaCl2	PlotCalais01_/_Remaining phosphorus - mg/L - Remaining phosphorus - Remaining phosphorus
taxonIdCalais087	Rocky outcrops	10	Percentage	2008-10-21T09:26Z	Estimation	PlotCalais01_/_Rocky outcrops - Percentage - Estimation - Rocky outcrops
taxonIdCalais087	Inclination	3	Percentage	2008-10-21T09:26Z	Estimation	PlotCalais01_/_Inclination - Percentage - Estimation - Inclination
taxonIdCalais089	Coarse sand content	39	Percentage	2008-10-21T09:26Z	sieving	PlotCalais01_/_Coarse sand content - Percentage - sieving - Coarse sand content
taxonIdCalais089	Fine sand content	34	Percentage	2008-10-21T09:26Z	sieving	PlotCalais01_/_Fine sand content - Percentage - sieving - Fine sand content
taxonIdCalais089	Silt content	15	Percentage	2008-10-21T09:26Z	sieving	PlotCalais01_/_Silt content - Percentage - sieving - Silt content
taxonIdCalais089	Clay content	12	Percentage	2008-10-21T09:26Z	sieving	PlotCalais01_/_Clay content - Percentage - sieving - Clay content
taxonIdCalais089	Soil acidity (pH)	5.12	nondimensional	2008-10-21T09:26Z	pH in water	PlotCalais01_/_Soil acidity (pH) - nondimensional - pH in water - Soil acidity (pH)
taxonIdCalais089	Availability of phosphorus	1.4	mg/dm3	2008-10-21T09:26Z	Extrator Mehlich 1	PlotCalais01_/_Availability of phosphorus - mg/dm3 - Extrator Mehlich 1 - Availability of phosphorus
taxonIdCalais089	Potassium availability	30	mg/dm3	2008-10-21T09:26Z	Extrator Mehlich 1	PlotCalais01_/_Potassium availability - mg/dm3 - Extrator Mehlich 1 - Potassium availability
taxonIdCalais089	Calcium availability	0.36	cmolc/dm3	2008-10-21T09:26Z	Extractor KCl 1mol/L	PlotCalais01_/_Calcium availability - cmolc/dm3 - Extractor KCl 1mol/L - Calcium availability
taxonIdCalais089	Magnesium availability	0.09	cmolc/dm3	2008-10-21T09:26Z	Extractor KCl 1mol/L	PlotCalais01_/_Magnesium availability - cmolc/dm3 - Extractor KCl 1mol/L - Magnesium availability
taxonIdCalais089	Aluminium avalaibility	1.18	cmolc/dm3	2008-10-21T09:26Z	Extractor KCl 1mol/L	PlotCalais01_/_Aluminium avalaibility - cmolc/dm3 - Extractor KCl 1mol/L - Aluminium avalaibility
taxonIdCalais089	Potential Acidity (H+AL)	4.6	cmolc/dm3	2008-10-21T09:26Z	Extractor Ca(CH3COO)2, 0.5mol/L, pH 7.0	PlotCalais01_/_Potential acidity (H+Al) - cmolc/dm3 - Extractor Ca(CH3COO)2, 0.5mol/L, pH 7.0 - Potential acidity (H+Al)
taxonIdCalais089	Interchangeable Bases	0.53	cmolc/dm3	2008-10-21T09:26Z	Interchangeable bases	PlotCalais01_/_Interchangeable bases - cmolc/dm3 - Interchangeable bases - Sum of Interchangeable bases
taxonIdCalais089	Effective cation exchange capacity	1.71	cmolc/dm3	2008-10-21T09:26Z	Effective cation exchange capacity	PlotCalais01_/_Effective cation exchange capacity - cmolc/dm3 - Effective cation exchange capacity - Effective cation exchange capacity
taxonIdCalais089	Cation exchange capacity at pH 7.0	5.13	cmolc/dm3	2008-10-21T09:26Z	Cation exchange capacity at pH 7.0	PlotCalais01_/_Cation exchange capacity at pH 7.0 - cmolc/dm3 - Cation exchange capacity at pH 7.0 - Cation exchange capacity at pH 7.0
taxonIdCalais089	Saturation of bases	10.3	Percentage	2008-10-21T09:26Z	Saturation of bases	PlotCalais01_/_Saturation of bases - Percentage - Saturation of bases - Saturation of bases
taxonIdCalais089	Saturation of aluminium	69	Percentage	2008-10-21T09:26Z	Saturation of aluminium	PlotCalais01_/_Saturation of aluminium - Percentage - Saturation of aluminium - Saturation of aluminium
taxonIdCalais089	Remaining phosphorus	37.8	mg/L	2008-10-21T09:26Z	Extraction with 0.01 mol/L CaCl2	PlotCalais01_/_Remaining phosphorus - mg/L - Remaining phosphorus - Remaining phosphorus
taxonIdCalais089	Rocky outcrops	10	Percentage	2008-10-21T09:26Z	Estimation	PlotCalais01_/_Rocky outcrops - Percentage - Estimation - Rocky outcrops
taxonIdCalais089	Inclination	3	Percentage	2008-10-21T09:26Z	Estimation	PlotCalais01_/_Inclination - Percentage - Estimation - Inclination
taxonIdCalais091	Coarse sand content	39	Percentage	2008-10-21T09:26Z	sieving	PlotCalais01_/_Coarse sand content - Percentage - sieving - Coarse sand content
taxonIdCalais091	Fine sand content	34	Percentage	2008-10-21T09:26Z	sieving	PlotCalais01_/_Fine sand content - Percentage - sieving - Fine sand content
taxonIdCalais091	Silt content	15	Percentage	2008-10-21T09:26Z	sieving	PlotCalais01_/_Silt content - Percentage - sieving - Silt content
taxonIdCalais091	Clay content	12	Percentage	2008-10-21T09:26Z	sieving	PlotCalais01_/_Clay content - Percentage - sieving - Clay content
taxonIdCalais091	Soil acidity (pH)	5.12	nondimensional	2008-10-21T09:26Z	pH in water	PlotCalais01_/_Soil acidity (pH) - nondimensional - pH in water - Soil acidity (pH)
taxonIdCalais091	Availability of phosphorus	1.4	mg/dm3	2008-10-21T09:26Z	Extrator Mehlich 1	PlotCalais01_/_Availability of phosphorus - mg/dm3 - Extrator Mehlich 1 - Availability of phosphorus
taxonIdCalais091	Potassium availability	30	mg/dm3	2008-10-21T09:26Z	Extrator Mehlich 1	PlotCalais01_/_Potassium availability - mg/dm3 - Extrator Mehlich 1 - Potassium availability
taxonIdCalais091	Calcium availability	0.36	cmolc/dm3	2008-10-21T09:26Z	Extractor KCl 1mol/L	PlotCalais01_/_Calcium availability - cmolc/dm3 - Extractor KCl 1mol/L - Calcium availability
taxonIdCalais091	Magnesium availability	0.09	cmolc/dm3	2008-10-21T09:26Z	Extractor KCl 1mol/L	PlotCalais01_/_Magnesium availability - cmolc/dm3 - Extractor KCl 1mol/L - Magnesium availability
taxonIdCalais091	Aluminium avalaibility	1.18	cmolc/dm3	2008-10-21T09:26Z	Extractor KCl 1mol/L	PlotCalais01_/_Aluminium avalaibility - cmolc/dm3 - Extractor KCl 1mol/L - Aluminium avalaibility
taxonIdCalais091	Potential Acidity (H+AL)	4.6	cmolc/dm3	2008-10-21T09:26Z	Extractor Ca(CH3COO)2, 0.5mol/L, pH 7.0	PlotCalais01_/_Potential acidity (H+Al) - cmolc/dm3 - Extractor Ca(CH3COO)2, 0.5mol/L, pH 7.0 - Potential acidity (H+Al)
taxonIdCalais091	Interchangeable Bases	0.53	cmolc/dm3	2008-10-21T09:26Z	Interchangeable bases	PlotCalais01_/_Interchangeable bases - cmolc/dm3 - Interchangeable bases - Sum of Interchangeable bases
taxonIdCalais091	Effective cation exchange capacity	1.71	cmolc/dm3	2008-10-21T09:26Z	Effective cation exchange capacity	PlotCalais01_/_Effective cation exchange capacity - cmolc/dm3 - Effective cation exchange capacity - Effective cation exchange capacity
taxonIdCalais091	Cation exchange capacity at pH 7.0	5.13	cmolc/dm3	2008-10-21T09:26Z	Cation exchange capacity at pH 7.0	PlotCalais01_/_Cation exchange capacity at pH 7.0 - cmolc/dm3 - Cation exchange capacity at pH 7.0 - Cation exchange capacity at pH 7.0
taxonIdCalais091	Saturation of bases	10.3	Percentage	2008-10-21T09:26Z	Saturation of bases	PlotCalais01_/_Saturation of bases - Percentage - Saturation of bases - Saturation of bases
taxonIdCalais091	Saturation of aluminium	69	Percentage	2008-10-21T09:26Z	Saturation of aluminium	PlotCalais01_/_Saturation of aluminium - Percentage - Saturation of aluminium - Saturation of aluminium
taxonIdCalais091	Remaining phosphorus	37.8	mg/L	2008-10-21T09:26Z	Extraction with 0.01 mol/L CaCl2	PlotCalais01_/_Remaining phosphorus - mg/L - Remaining phosphorus - Remaining phosphorus
taxonIdCalais091	Rocky outcrops	10	Percentage	2008-10-21T09:26Z	Estimation	PlotCalais01_/_Rocky outcrops - Percentage - Estimation - Rocky outcrops
taxonIdCalais091	Inclination	3	Percentage	2008-10-21T09:26Z	Estimation	PlotCalais01_/_Inclination - Percentage - Estimation - Inclination
taxonIdCalais092	Coarse sand content	39	Percentage	2008-10-21T09:26Z	sieving	PlotCalais01_/_Coarse sand content - Percentage - sieving - Coarse sand content
taxonIdCalais092	Fine sand content	34	Percentage	2008-10-21T09:26Z	sieving	PlotCalais01_/_Fine sand content - Percentage - sieving - Fine sand content
taxonIdCalais092	Silt content	15	Percentage	2008-10-21T09:26Z	sieving	PlotCalais01_/_Silt content - Percentage - sieving - Silt content
taxonIdCalais092	Clay content	12	Percentage	2008-10-21T09:26Z	sieving	PlotCalais01_/_Clay content - Percentage - sieving - Clay content
taxonIdCalais092	Soil acidity (pH)	5.12	nondimensional	2008-10-21T09:26Z	pH in water	PlotCalais01_/_Soil acidity (pH) - nondimensional - pH in water - Soil acidity (pH)
taxonIdCalais092	Availability of phosphorus	1.4	mg/dm3	2008-10-21T09:26Z	Extrator Mehlich 1	PlotCalais01_/_Availability of phosphorus - mg/dm3 - Extrator Mehlich 1 - Availability of phosphorus
taxonIdCalais092	Potassium availability	30	mg/dm3	2008-10-21T09:26Z	Extrator Mehlich 1	PlotCalais01_/_Potassium availability - mg/dm3 - Extrator Mehlich 1 - Potassium availability
taxonIdCalais092	Calcium availability	0.36	cmolc/dm3	2008-10-21T09:26Z	Extractor KCl 1mol/L	PlotCalais01_/_Calcium availability - cmolc/dm3 - Extractor KCl 1mol/L - Calcium availability
taxonIdCalais092	Magnesium availability	0.09	cmolc/dm3	2008-10-21T09:26Z	Extractor KCl 1mol/L	PlotCalais01_/_Magnesium availability - cmolc/dm3 - Extractor KCl 1mol/L - Magnesium availability
taxonIdCalais092	Aluminium avalaibility	1.18	cmolc/dm3	2008-10-21T09:26Z	Extractor KCl 1mol/L	PlotCalais01_/_Aluminium avalaibility - cmolc/dm3 - Extractor KCl 1mol/L - Aluminium avalaibility
taxonIdCalais092	Potential Acidity (H+AL)	4.6	cmolc/dm3	2008-10-21T09:26Z	Extractor Ca(CH3COO)2, 0.5mol/L, pH 7.0	PlotCalais01_/_Potential acidity (H+Al) - cmolc/dm3 - Extractor Ca(CH3COO)2, 0.5mol/L, pH 7.0 - Potential acidity (H+Al)
taxonIdCalais092	Interchangeable Bases	0.53	cmolc/dm3	2008-10-21T09:26Z	Interchangeable bases	PlotCalais01_/_Interchangeable bases - cmolc/dm3 - Interchangeable bases - Sum of Interchangeable bases
taxonIdCalais092	Effective cation exchange capacity	1.71	cmolc/dm3	2008-10-21T09:26Z	Effective cation exchange capacity	PlotCalais01_/_Effective cation exchange capacity - cmolc/dm3 - Effective cation exchange capacity - Effective cation exchange capacity
taxonIdCalais092	Cation exchange capacity at pH 7.0	5.13	cmolc/dm3	2008-10-21T09:26Z	Cation exchange capacity at pH 7.0	PlotCalais01_/_Cation exchange capacity at pH 7.0 - cmolc/dm3 - Cation exchange capacity at pH 7.0 - Cation exchange capacity at pH 7.0
taxonIdCalais092	Saturation of bases	10.3	Percentage	2008-10-21T09:26Z	Saturation of bases	PlotCalais01_/_Saturation of bases - Percentage - Saturation of bases - Saturation of bases
taxonIdCalais092	Saturation of aluminium	69	Percentage	2008-10-21T09:26Z	Saturation of aluminium	PlotCalais01_/_Saturation of aluminium - Percentage - Saturation of aluminium - Saturation of aluminium
taxonIdCalais092	Remaining phosphorus	37.8	mg/L	2008-10-21T09:26Z	Extraction with 0.01 mol/L CaCl2	PlotCalais01_/_Remaining phosphorus - mg/L - Remaining phosphorus - Remaining phosphorus
taxonIdCalais092	Rocky outcrops	10	Percentage	2008-10-21T09:26Z	Estimation	PlotCalais01_/_Rocky outcrops - Percentage - Estimation - Rocky outcrops
taxonIdCalais092	Inclination	3	Percentage	2008-10-21T09:26Z	Estimation	PlotCalais01_/_Inclination - Percentage - Estimation - Inclination
taxonIdCalais093	Coarse sand content	39	Percentage	2008-10-21T09:26Z	sieving	PlotCalais01_/_Coarse sand content - Percentage - sieving - Coarse sand content
taxonIdCalais093	Fine sand content	34	Percentage	2008-10-21T09:26Z	sieving	PlotCalais01_/_Fine sand content - Percentage - sieving - Fine sand content
taxonIdCalais093	Silt content	15	Percentage	2008-10-21T09:26Z	sieving	PlotCalais01_/_Silt content - Percentage - sieving - Silt content
taxonIdCalais093	Clay content	12	Percentage	2008-10-21T09:26Z	sieving	PlotCalais01_/_Clay content - Percentage - sieving - Clay content
taxonIdCalais093	Soil acidity (pH)	5.12	nondimensional	2008-10-21T09:26Z	pH in water	PlotCalais01_/_Soil acidity (pH) - nondimensional - pH in water - Soil acidity (pH)
taxonIdCalais093	Availability of phosphorus	1.4	mg/dm3	2008-10-21T09:26Z	Extrator Mehlich 1	PlotCalais01_/_Availability of phosphorus - mg/dm3 - Extrator Mehlich 1 - Availability of phosphorus
taxonIdCalais093	Potassium availability	30	mg/dm3	2008-10-21T09:26Z	Extrator Mehlich 1	PlotCalais01_/_Potassium availability - mg/dm3 - Extrator Mehlich 1 - Potassium availability
taxonIdCalais093	Calcium availability	0.36	cmolc/dm3	2008-10-21T09:26Z	Extractor KCl 1mol/L	PlotCalais01_/_Calcium availability - cmolc/dm3 - Extractor KCl 1mol/L - Calcium availability
taxonIdCalais093	Magnesium availability	0.09	cmolc/dm3	2008-10-21T09:26Z	Extractor KCl 1mol/L	PlotCalais01_/_Magnesium availability - cmolc/dm3 - Extractor KCl 1mol/L - Magnesium availability
taxonIdCalais093	Aluminium avalaibility	1.18	cmolc/dm3	2008-10-21T09:26Z	Extractor KCl 1mol/L	PlotCalais01_/_Aluminium avalaibility - cmolc/dm3 - Extractor KCl 1mol/L - Aluminium avalaibility
taxonIdCalais093	Potential Acidity (H+AL)	4.6	cmolc/dm3	2008-10-21T09:26Z	Extractor Ca(CH3COO)2, 0.5mol/L, pH 7.0	PlotCalais01_/_Potential acidity (H+Al) - cmolc/dm3 - Extractor Ca(CH3COO)2, 0.5mol/L, pH 7.0 - Potential acidity (H+Al)
taxonIdCalais093	Interchangeable Bases	0.53	cmolc/dm3	2008-10-21T09:26Z	Interchangeable bases	PlotCalais01_/_Interchangeable bases - cmolc/dm3 - Interchangeable bases - Sum of Interchangeable bases
taxonIdCalais093	Effective cation exchange capacity	1.71	cmolc/dm3	2008-10-21T09:26Z	Effective cation exchange capacity	PlotCalais01_/_Effective cation exchange capacity - cmolc/dm3 - Effective cation exchange capacity - Effective cation exchange capacity
taxonIdCalais093	Cation exchange capacity at pH 7.0	5.13	cmolc/dm3	2008-10-21T09:26Z	Cation exchange capacity at pH 7.0	PlotCalais01_/_Cation exchange capacity at pH 7.0 - cmolc/dm3 - Cation exchange capacity at pH 7.0 - Cation exchange capacity at pH 7.0
taxonIdCalais093	Saturation of bases	10.3	Percentage	2008-10-21T09:26Z	Saturation of bases	PlotCalais01_/_Saturation of bases - Percentage - Saturation of bases - Saturation of bases
taxonIdCalais093	Saturation of aluminium	69	Percentage	2008-10-21T09:26Z	Saturation of aluminium	PlotCalais01_/_Saturation of aluminium - Percentage - Saturation of aluminium - Saturation of aluminium
taxonIdCalais093	Remaining phosphorus	37.8	mg/L	2008-10-21T09:26Z	Extraction with 0.01 mol/L CaCl2	PlotCalais01_/_Remaining phosphorus - mg/L - Remaining phosphorus - Remaining phosphorus
taxonIdCalais093	Rocky outcrops	10	Percentage	2008-10-21T09:26Z	Estimation	PlotCalais01_/_Rocky outcrops - Percentage - Estimation - Rocky outcrops
taxonIdCalais093	Inclination	3	Percentage	2008-10-21T09:26Z	Estimation	PlotCalais01_/_Inclination - Percentage - Estimation - Inclination
taxonIdCalais094	Coarse sand content	39	Percentage	2008-10-21T09:26Z	sieving	PlotCalais01_/_Coarse sand content - Percentage - sieving - Coarse sand content
taxonIdCalais094	Fine sand content	34	Percentage	2008-10-21T09:26Z	sieving	PlotCalais01_/_Fine sand content - Percentage - sieving - Fine sand content
taxonIdCalais094	Silt content	15	Percentage	2008-10-21T09:26Z	sieving	PlotCalais01_/_Silt content - Percentage - sieving - Silt content
taxonIdCalais094	Clay content	12	Percentage	2008-10-21T09:26Z	sieving	PlotCalais01_/_Clay content - Percentage - sieving - Clay content
taxonIdCalais094	Soil acidity (pH)	5.12	nondimensional	2008-10-21T09:26Z	pH in water	PlotCalais01_/_Soil acidity (pH) - nondimensional - pH in water - Soil acidity (pH)
taxonIdCalais094	Availability of phosphorus	1.4	mg/dm3	2008-10-21T09:26Z	Extrator Mehlich 1	PlotCalais01_/_Availability of phosphorus - mg/dm3 - Extrator Mehlich 1 - Availability of phosphorus
taxonIdCalais094	Potassium availability	30	mg/dm3	2008-10-21T09:26Z	Extrator Mehlich 1	PlotCalais01_/_Potassium availability - mg/dm3 - Extrator Mehlich 1 - Potassium availability
taxonIdCalais094	Calcium availability	0.36	cmolc/dm3	2008-10-21T09:26Z	Extractor KCl 1mol/L	PlotCalais01_/_Calcium availability - cmolc/dm3 - Extractor KCl 1mol/L - Calcium availability
taxonIdCalais094	Magnesium availability	0.09	cmolc/dm3	2008-10-21T09:26Z	Extractor KCl 1mol/L	PlotCalais01_/_Magnesium availability - cmolc/dm3 - Extractor KCl 1mol/L - Magnesium availability
taxonIdCalais094	Aluminium avalaibility	1.18	cmolc/dm3	2008-10-21T09:26Z	Extractor KCl 1mol/L	PlotCalais01_/_Aluminium avalaibility - cmolc/dm3 - Extractor KCl 1mol/L - Aluminium avalaibility
taxonIdCalais094	Potential Acidity (H+AL)	4.6	cmolc/dm3	2008-10-21T09:26Z	Extractor Ca(CH3COO)2, 0.5mol/L, pH 7.0	PlotCalais01_/_Potential acidity (H+Al) - cmolc/dm3 - Extractor Ca(CH3COO)2, 0.5mol/L, pH 7.0 - Potential acidity (H+Al)
taxonIdCalais094	Interchangeable Bases	0.53	cmolc/dm3	2008-10-21T09:26Z	Interchangeable bases	PlotCalais01_/_Interchangeable bases - cmolc/dm3 - Interchangeable bases - Sum of Interchangeable bases
taxonIdCalais094	Effective cation exchange capacity	1.71	cmolc/dm3	2008-10-21T09:26Z	Effective cation exchange capacity	PlotCalais01_/_Effective cation exchange capacity - cmolc/dm3 - Effective cation exchange capacity - Effective cation exchange capacity
taxonIdCalais094	Cation exchange capacity at pH 7.0	5.13	cmolc/dm3	2008-10-21T09:26Z	Cation exchange capacity at pH 7.0	PlotCalais01_/_Cation exchange capacity at pH 7.0 - cmolc/dm3 - Cation exchange capacity at pH 7.0 - Cation exchange capacity at pH 7.0
taxonIdCalais094	Saturation of bases	10.3	Percentage	2008-10-21T09:26Z	Saturation of bases	PlotCalais01_/_Saturation of bases - Percentage - Saturation of bases - Saturation of bases
taxonIdCalais094	Saturation of aluminium	69	Percentage	2008-10-21T09:26Z	Saturation of aluminium	PlotCalais01_/_Saturation of aluminium - Percentage - Saturation of aluminium - Saturation of aluminium
taxonIdCalais094	Remaining phosphorus	37.8	mg/L	2008-10-21T09:26Z	Extraction with 0.01 mol/L CaCl2	PlotCalais01_/_Remaining phosphorus - mg/L - Remaining phosphorus - Remaining phosphorus
taxonIdCalais094	Rocky outcrops	10	Percentage	2008-10-21T09:26Z	Estimation	PlotCalais01_/_Rocky outcrops - Percentage - Estimation - Rocky outcrops
taxonIdCalais094	Inclination	3	Percentage	2008-10-21T09:26Z	Estimation	PlotCalais01_/_Inclination - Percentage - Estimation - Inclination
taxonIdCalais097	Coarse sand content	39	Percentage	2008-10-21T09:26Z	sieving	PlotCalais01_/_Coarse sand content - Percentage - sieving - Coarse sand content
taxonIdCalais097	Fine sand content	34	Percentage	2008-10-21T09:26Z	sieving	PlotCalais01_/_Fine sand content - Percentage - sieving - Fine sand content
taxonIdCalais097	Silt content	15	Percentage	2008-10-21T09:26Z	sieving	PlotCalais01_/_Silt content - Percentage - sieving - Silt content
taxonIdCalais097	Clay content	12	Percentage	2008-10-21T09:26Z	sieving	PlotCalais01_/_Clay content - Percentage - sieving - Clay content
taxonIdCalais097	Soil acidity (pH)	5.12	nondimensional	2008-10-21T09:26Z	pH in water	PlotCalais01_/_Soil acidity (pH) - nondimensional - pH in water - Soil acidity (pH)
taxonIdCalais097	Availability of phosphorus	1.4	mg/dm3	2008-10-21T09:26Z	Extrator Mehlich 1	PlotCalais01_/_Availability of phosphorus - mg/dm3 - Extrator Mehlich 1 - Availability of phosphorus
taxonIdCalais097	Potassium availability	30	mg/dm3	2008-10-21T09:26Z	Extrator Mehlich 1	PlotCalais01_/_Potassium availability - mg/dm3 - Extrator Mehlich 1 - Potassium availability
taxonIdCalais097	Calcium availability	0.36	cmolc/dm3	2008-10-21T09:26Z	Extractor KCl 1mol/L	PlotCalais01_/_Calcium availability - cmolc/dm3 - Extractor KCl 1mol/L - Calcium availability
taxonIdCalais097	Magnesium availability	0.09	cmolc/dm3	2008-10-21T09:26Z	Extractor KCl 1mol/L	PlotCalais01_/_Magnesium availability - cmolc/dm3 - Extractor KCl 1mol/L - Magnesium availability
taxonIdCalais097	Aluminium avalaibility	1.18	cmolc/dm3	2008-10-21T09:26Z	Extractor KCl 1mol/L	PlotCalais01_/_Aluminium avalaibility - cmolc/dm3 - Extractor KCl 1mol/L - Aluminium avalaibility
taxonIdCalais097	Potential Acidity (H+AL)	4.6	cmolc/dm3	2008-10-21T09:26Z	Extractor Ca(CH3COO)2, 0.5mol/L, pH 7.0	PlotCalais01_/_Potential acidity (H+Al) - cmolc/dm3 - Extractor Ca(CH3COO)2, 0.5mol/L, pH 7.0 - Potential acidity (H+Al)
taxonIdCalais097	Interchangeable Bases	0.53	cmolc/dm3	2008-10-21T09:26Z	Interchangeable bases	PlotCalais01_/_Interchangeable bases - cmolc/dm3 - Interchangeable bases - Sum of Interchangeable bases
taxonIdCalais097	Effective cation exchange capacity	1.71	cmolc/dm3	2008-10-21T09:26Z	Effective cation exchange capacity	PlotCalais01_/_Effective cation exchange capacity - cmolc/dm3 - Effective cation exchange capacity - Effective cation exchange capacity
taxonIdCalais097	Cation exchange capacity at pH 7.0	5.13	cmolc/dm3	2008-10-21T09:26Z	Cation exchange capacity at pH 7.0	PlotCalais01_/_Cation exchange capacity at pH 7.0 - cmolc/dm3 - Cation exchange capacity at pH 7.0 - Cation exchange capacity at pH 7.0
taxonIdCalais097	Saturation of bases	10.3	Percentage	2008-10-21T09:26Z	Saturation of bases	PlotCalais01_/_Saturation of bases - Percentage - Saturation of bases - Saturation of bases
taxonIdCalais097	Saturation of aluminium	69	Percentage	2008-10-21T09:26Z	Saturation of aluminium	PlotCalais01_/_Saturation of aluminium - Percentage - Saturation of aluminium - Saturation of aluminium
taxonIdCalais097	Remaining phosphorus	37.8	mg/L	2008-10-21T09:26Z	Extraction with 0.01 mol/L CaCl2	PlotCalais01_/_Remaining phosphorus - mg/L - Remaining phosphorus - Remaining phosphorus
taxonIdCalais097	Rocky outcrops	10	Percentage	2008-10-21T09:26Z	Estimation	PlotCalais01_/_Rocky outcrops - Percentage - Estimation - Rocky outcrops
taxonIdCalais097	Inclination	3	Percentage	2008-10-21T09:26Z	Estimation	PlotCalais01_/_Inclination - Percentage - Estimation - Inclination
taxonIdCalais100	Coarse sand content	39	Percentage	2008-10-21T09:26Z	sieving	PlotCalais01_/_Coarse sand content - Percentage - sieving - Coarse sand content
taxonIdCalais100	Fine sand content	34	Percentage	2008-10-21T09:26Z	sieving	PlotCalais01_/_Fine sand content - Percentage - sieving - Fine sand content
taxonIdCalais100	Silt content	15	Percentage	2008-10-21T09:26Z	sieving	PlotCalais01_/_Silt content - Percentage - sieving - Silt content
taxonIdCalais100	Clay content	12	Percentage	2008-10-21T09:26Z	sieving	PlotCalais01_/_Clay content - Percentage - sieving - Clay content
taxonIdCalais100	Soil acidity (pH)	5.12	nondimensional	2008-10-21T09:26Z	pH in water	PlotCalais01_/_Soil acidity (pH) - nondimensional - pH in water - Soil acidity (pH)
taxonIdCalais100	Availability of phosphorus	1.4	mg/dm3	2008-10-21T09:26Z	Extrator Mehlich 1	PlotCalais01_/_Availability of phosphorus - mg/dm3 - Extrator Mehlich 1 - Availability of phosphorus
taxonIdCalais100	Potassium availability	30	mg/dm3	2008-10-21T09:26Z	Extrator Mehlich 1	PlotCalais01_/_Potassium availability - mg/dm3 - Extrator Mehlich 1 - Potassium availability
taxonIdCalais100	Calcium availability	0.36	cmolc/dm3	2008-10-21T09:26Z	Extractor KCl 1mol/L	PlotCalais01_/_Calcium availability - cmolc/dm3 - Extractor KCl 1mol/L - Calcium availability
taxonIdCalais100	Magnesium availability	0.09	cmolc/dm3	2008-10-21T09:26Z	Extractor KCl 1mol/L	PlotCalais01_/_Magnesium availability - cmolc/dm3 - Extractor KCl 1mol/L - Magnesium availability
taxonIdCalais100	Aluminium avalaibility	1.18	cmolc/dm3	2008-10-21T09:26Z	Extractor KCl 1mol/L	PlotCalais01_/_Aluminium avalaibility - cmolc/dm3 - Extractor KCl 1mol/L - Aluminium avalaibility
taxonIdCalais100	Potential Acidity (H+AL)	4.6	cmolc/dm3	2008-10-21T09:26Z	Extractor Ca(CH3COO)2, 0.5mol/L, pH 7.0	PlotCalais01_/_Potential acidity (H+Al) - cmolc/dm3 - Extractor Ca(CH3COO)2, 0.5mol/L, pH 7.0 - Potential acidity (H+Al)
taxonIdCalais100	Interchangeable Bases	0.53	cmolc/dm3	2008-10-21T09:26Z	Interchangeable bases	PlotCalais01_/_Interchangeable bases - cmolc/dm3 - Interchangeable bases - Sum of Interchangeable bases
taxonIdCalais100	Effective cation exchange capacity	1.71	cmolc/dm3	2008-10-21T09:26Z	Effective cation exchange capacity	PlotCalais01_/_Effective cation exchange capacity - cmolc/dm3 - Effective cation exchange capacity - Effective cation exchange capacity
taxonIdCalais100	Cation exchange capacity at pH 7.0	5.13	cmolc/dm3	2008-10-21T09:26Z	Cation exchange capacity at pH 7.0	PlotCalais01_/_Cation exchange capacity at pH 7.0 - cmolc/dm3 - Cation exchange capacity at pH 7.0 - Cation exchange capacity at pH 7.0
taxonIdCalais100	Saturation of bases	10.3	Percentage	2008-10-21T09:26Z	Saturation of bases	PlotCalais01_/_Saturation of bases - Percentage - Saturation of bases - Saturation of bases
taxonIdCalais100	Saturation of aluminium	69	Percentage	2008-10-21T09:26Z	Saturation of aluminium	PlotCalais01_/_Saturation of aluminium - Percentage - Saturation of aluminium - Saturation of aluminium
taxonIdCalais100	Remaining phosphorus	37.8	mg/L	2008-10-21T09:26Z	Extraction with 0.01 mol/L CaCl2	PlotCalais01_/_Remaining phosphorus - mg/L - Remaining phosphorus - Remaining phosphorus
taxonIdCalais100	Rocky outcrops	10	Percentage	2008-10-21T09:26Z	Estimation	PlotCalais01_/_Rocky outcrops - Percentage - Estimation - Rocky outcrops
taxonIdCalais100	Inclination	3	Percentage	2008-10-21T09:26Z	Estimation	PlotCalais01_/_Inclination - Percentage - Estimation - Inclination
taxonIdCalais101	Coarse sand content	39	Percentage	2008-10-21T09:26Z	sieving	PlotCalais01_/_Coarse sand content - Percentage - sieving - Coarse sand content
taxonIdCalais101	Fine sand content	34	Percentage	2008-10-21T09:26Z	sieving	PlotCalais01_/_Fine sand content - Percentage - sieving - Fine sand content
taxonIdCalais101	Silt content	15	Percentage	2008-10-21T09:26Z	sieving	PlotCalais01_/_Silt content - Percentage - sieving - Silt content
taxonIdCalais101	Clay content	12	Percentage	2008-10-21T09:26Z	sieving	PlotCalais01_/_Clay content - Percentage - sieving - Clay content
taxonIdCalais101	Soil acidity (pH)	5.12	nondimensional	2008-10-21T09:26Z	pH in water	PlotCalais01_/_Soil acidity (pH) - nondimensional - pH in water - Soil acidity (pH)
taxonIdCalais101	Availability of phosphorus	1.4	mg/dm3	2008-10-21T09:26Z	Extrator Mehlich 1	PlotCalais01_/_Availability of phosphorus - mg/dm3 - Extrator Mehlich 1 - Availability of phosphorus
taxonIdCalais101	Potassium availability	30	mg/dm3	2008-10-21T09:26Z	Extrator Mehlich 1	PlotCalais01_/_Potassium availability - mg/dm3 - Extrator Mehlich 1 - Potassium availability
taxonIdCalais101	Calcium availability	0.36	cmolc/dm3	2008-10-21T09:26Z	Extractor KCl 1mol/L	PlotCalais01_/_Calcium availability - cmolc/dm3 - Extractor KCl 1mol/L - Calcium availability
taxonIdCalais101	Magnesium availability	0.09	cmolc/dm3	2008-10-21T09:26Z	Extractor KCl 1mol/L	PlotCalais01_/_Magnesium availability - cmolc/dm3 - Extractor KCl 1mol/L - Magnesium availability
taxonIdCalais101	Aluminium avalaibility	1.18	cmolc/dm3	2008-10-21T09:26Z	Extractor KCl 1mol/L	PlotCalais01_/_Aluminium avalaibility - cmolc/dm3 - Extractor KCl 1mol/L - Aluminium avalaibility
taxonIdCalais101	Potential Acidity (H+AL)	4.6	cmolc/dm3	2008-10-21T09:26Z	Extractor Ca(CH3COO)2, 0.5mol/L, pH 7.0	PlotCalais01_/_Potential acidity (H+Al) - cmolc/dm3 - Extractor Ca(CH3COO)2, 0.5mol/L, pH 7.0 - Potential acidity (H+Al)
taxonIdCalais101	Interchangeable Bases	0.53	cmolc/dm3	2008-10-21T09:26Z	Interchangeable bases	PlotCalais01_/_Interchangeable bases - cmolc/dm3 - Interchangeable bases - Sum of Interchangeable bases
taxonIdCalais101	Effective cation exchange capacity	1.71	cmolc/dm3	2008-10-21T09:26Z	Effective cation exchange capacity	PlotCalais01_/_Effective cation exchange capacity - cmolc/dm3 - Effective cation exchange capacity - Effective cation exchange capacity
taxonIdCalais101	Cation exchange capacity at pH 7.0	5.13	cmolc/dm3	2008-10-21T09:26Z	Cation exchange capacity at pH 7.0	PlotCalais01_/_Cation exchange capacity at pH 7.0 - cmolc/dm3 - Cation exchange capacity at pH 7.0 - Cation exchange capacity at pH 7.0
taxonIdCalais101	Saturation of bases	10.3	Percentage	2008-10-21T09:26Z	Saturation of bases	PlotCalais01_/_Saturation of bases - Percentage - Saturation of bases - Saturation of bases
taxonIdCalais101	Saturation of aluminium	69	Percentage	2008-10-21T09:26Z	Saturation of aluminium	PlotCalais01_/_Saturation of aluminium - Percentage - Saturation of aluminium - Saturation of aluminium
taxonIdCalais101	Remaining phosphorus	37.8	mg/L	2008-10-21T09:26Z	Extraction with 0.01 mol/L CaCl2	PlotCalais01_/_Remaining phosphorus - mg/L - Remaining phosphorus - Remaining phosphorus
taxonIdCalais101	Rocky outcrops	10	Percentage	2008-10-21T09:26Z	Estimation	PlotCalais01_/_Rocky outcrops - Percentage - Estimation - Rocky outcrops
taxonIdCalais101	Inclination	3	Percentage	2008-10-21T09:26Z	Estimation	PlotCalais01_/_Inclination - Percentage - Estimation - Inclination
taxonIdCalais005	Coarse sand content	33	Percentage	2008-10-21T09:26Z	sieving	PlotCalais02_/_Coarse sand content - Percentage - sieving - Coarse sand content
taxonIdCalais005	Fine sand content	37	Percentage	2008-10-21T09:26Z	sieving	PlotCalais02_/_Fine sand content - Percentage - sieving - Fine sand content
taxonIdCalais005	Silt content	18	Percentage	2008-10-21T09:26Z	sieving	PlotCalais02_/_Silt content - Percentage - sieving - Silt content
taxonIdCalais005	Clay content	12	Percentage	2008-10-21T09:26Z	sieving	PlotCalais02_/_Clay content - Percentage - sieving - Clay content
taxonIdCalais005	Soil acidity (pH)	5.05	nondimensional	2008-10-21T09:26Z	pH in water	PlotCalais02_/_Soil acidity (pH) - nondimensional - pH in water - Soil acidity (pH)
taxonIdCalais005	Availability of phosphorus	1.7	mg/dm3	2008-10-21T09:26Z	Extrator Mehlich 1	PlotCalais02_/_Availability of phosphorus - mg/dm3 - Extrator Mehlich 1 - Availability of phosphorus
taxonIdCalais005	Potassium availability	33	mg/dm3	2008-10-21T09:26Z	Extrator Mehlich 1	PlotCalais02_/_Potassium availability - mg/dm3 - Extrator Mehlich 1 - Potassium availability
taxonIdCalais005	Calcium availability	0.33	cmolc/dm3	2008-10-21T09:26Z	Extractor KCl 1mol/L	PlotCalais02_/_Calcium availability - cmolc/dm3 - Extractor KCl 1mol/L - Calcium availability
taxonIdCalais005	Magnesium availability	0.12	cmolc/dm3	2008-10-21T09:26Z	Extractor KCl 1mol/L	PlotCalais02_/_Magnesium availability - cmolc/dm3 - Extractor KCl 1mol/L - Magnesium availability
taxonIdCalais005	Aluminium avalaibility	1.18	cmolc/dm3	2008-10-21T09:26Z	Extractor KCl 1mol/L	PlotCalais02_/_Aluminium avalaibility - cmolc/dm3 - Extractor KCl 1mol/L - Aluminium avalaibility
taxonIdCalais005	Potential Acidity (H+AL)	4.9	cmolc/dm3	2008-10-21T09:26Z	Extractor Ca(CH3COO)2, 0.5mol/L, pH 7.0	PlotCalais02_/_Potential acidity (H+Al) - cmolc/dm3 - Extractor Ca(CH3COO)2, 0.5mol/L, pH 7.0 - Potential acidity (H+Al)
taxonIdCalais005	Interchangeable Bases	0.53	cmolc/dm3	2008-10-21T09:26Z	Interchangeable bases	PlotCalais02_/_Interchangeable bases - cmolc/dm3 - Interchangeable bases - Sum of Interchangeable bases
taxonIdCalais005	Effective cation exchange capacity	1.71	cmolc/dm3	2008-10-21T09:26Z	Effective cation exchange capacity	PlotCalais02_/_Effective cation exchange capacity - cmolc/dm3 - Effective cation exchange capacity - Effective cation exchange capacity
taxonIdCalais005	Cation exchange capacity at pH 7.0	5.43	cmolc/dm3	2008-10-21T09:26Z	Cation exchange capacity at pH 7.0	PlotCalais02_/_Cation exchange capacity at pH 7.0 - cmolc/dm3 - Cation exchange capacity at pH 7.0 - Cation exchange capacity at pH 7.0
taxonIdCalais005	Saturation of bases	9.8	Percentage	2008-10-21T09:26Z	Saturation of bases	PlotCalais02_/_Saturation of bases - Percentage - Saturation of bases - Saturation of bases
taxonIdCalais005	Saturation of aluminium	69	Percentage	2008-10-21T09:26Z	Saturation of aluminium	PlotCalais02_/_Saturation of aluminium - Percentage - Saturation of aluminium - Saturation of aluminium
taxonIdCalais005	Remaining phosphorus	38	mg/L	2008-10-21T09:26Z	Extraction with 0.01 mol/L CaCl2	PlotCalais02_/_Remaining phosphorus - mg/L - Remaining phosphorus - Remaining phosphorus
taxonIdCalais005	Rocky outcrops	5	Percentage	2008-10-21T09:26Z	Estimation	PlotCalais02_/_Rocky outcrops - Percentage - Estimation - Rocky outcrops
taxonIdCalais005	Inclination	5	Percentage	2008-10-21T09:26Z	Estimation	PlotCalais02_/_Inclination - Percentage - Estimation - Inclination
taxonIdCalais007	Coarse sand content	33	Percentage	2008-10-21T09:26Z	sieving	PlotCalais02_/_Coarse sand content - Percentage - sieving - Coarse sand content
taxonIdCalais007	Fine sand content	37	Percentage	2008-10-21T09:26Z	sieving	PlotCalais02_/_Fine sand content - Percentage - sieving - Fine sand content
taxonIdCalais007	Silt content	18	Percentage	2008-10-21T09:26Z	sieving	PlotCalais02_/_Silt content - Percentage - sieving - Silt content
taxonIdCalais007	Clay content	12	Percentage	2008-10-21T09:26Z	sieving	PlotCalais02_/_Clay content - Percentage - sieving - Clay content
taxonIdCalais007	Soil acidity (pH)	5.05	nondimensional	2008-10-21T09:26Z	pH in water	PlotCalais02_/_Soil acidity (pH) - nondimensional - pH in water - Soil acidity (pH)
taxonIdCalais007	Availability of phosphorus	1.7	mg/dm3	2008-10-21T09:26Z	Extrator Mehlich 1	PlotCalais02_/_Availability of phosphorus - mg/dm3 - Extrator Mehlich 1 - Availability of phosphorus
taxonIdCalais007	Potassium availability	33	mg/dm3	2008-10-21T09:26Z	Extrator Mehlich 1	PlotCalais02_/_Potassium availability - mg/dm3 - Extrator Mehlich 1 - Potassium availability
taxonIdCalais007	Calcium availability	0.33	cmolc/dm3	2008-10-21T09:26Z	Extractor KCl 1mol/L	PlotCalais02_/_Calcium availability - cmolc/dm3 - Extractor KCl 1mol/L - Calcium availability
taxonIdCalais007	Magnesium availability	0.12	cmolc/dm3	2008-10-21T09:26Z	Extractor KCl 1mol/L	PlotCalais02_/_Magnesium availability - cmolc/dm3 - Extractor KCl 1mol/L - Magnesium availability
taxonIdCalais007	Aluminium avalaibility	1.18	cmolc/dm3	2008-10-21T09:26Z	Extractor KCl 1mol/L	PlotCalais02_/_Aluminium avalaibility - cmolc/dm3 - Extractor KCl 1mol/L - Aluminium avalaibility
taxonIdCalais007	Potential Acidity (H+AL)	4.9	cmolc/dm3	2008-10-21T09:26Z	Extractor Ca(CH3COO)2, 0.5mol/L, pH 7.0	PlotCalais02_/_Potential acidity (H+Al) - cmolc/dm3 - Extractor Ca(CH3COO)2, 0.5mol/L, pH 7.0 - Potential acidity (H+Al)
taxonIdCalais007	Interchangeable Bases	0.53	cmolc/dm3	2008-10-21T09:26Z	Interchangeable bases	PlotCalais02_/_Interchangeable bases - cmolc/dm3 - Interchangeable bases - Sum of Interchangeable bases
taxonIdCalais007	Effective cation exchange capacity	1.71	cmolc/dm3	2008-10-21T09:26Z	Effective cation exchange capacity	PlotCalais02_/_Effective cation exchange capacity - cmolc/dm3 - Effective cation exchange capacity - Effective cation exchange capacity
taxonIdCalais007	Cation exchange capacity at pH 7.0	5.43	cmolc/dm3	2008-10-21T09:26Z	Cation exchange capacity at pH 7.0	PlotCalais02_/_Cation exchange capacity at pH 7.0 - cmolc/dm3 - Cation exchange capacity at pH 7.0 - Cation exchange capacity at pH 7.0
taxonIdCalais007	Saturation of bases	9.8	Percentage	2008-10-21T09:26Z	Saturation of bases	PlotCalais02_/_Saturation of bases - Percentage - Saturation of bases - Saturation of bases
taxonIdCalais007	Saturation of aluminium	69	Percentage	2008-10-21T09:26Z	Saturation of aluminium	PlotCalais02_/_Saturation of aluminium - Percentage - Saturation of aluminium - Saturation of aluminium
taxonIdCalais007	Remaining phosphorus	38	mg/L	2008-10-21T09:26Z	Extraction with 0.01 mol/L CaCl2	PlotCalais02_/_Remaining phosphorus - mg/L - Remaining phosphorus - Remaining phosphorus
taxonIdCalais007	Rocky outcrops	5	Percentage	2008-10-21T09:26Z	Estimation	PlotCalais02_/_Rocky outcrops - Percentage - Estimation - Rocky outcrops
taxonIdCalais007	Inclination	5	Percentage	2008-10-21T09:26Z	Estimation	PlotCalais02_/_Inclination - Percentage - Estimation - Inclination
taxonIdCalais009	Coarse sand content	33	Percentage	2008-10-21T09:26Z	sieving	PlotCalais02_/_Coarse sand content - Percentage - sieving - Coarse sand content
taxonIdCalais009	Fine sand content	37	Percentage	2008-10-21T09:26Z	sieving	PlotCalais02_/_Fine sand content - Percentage - sieving - Fine sand content
taxonIdCalais009	Silt content	18	Percentage	2008-10-21T09:26Z	sieving	PlotCalais02_/_Silt content - Percentage - sieving - Silt content
taxonIdCalais009	Clay content	12	Percentage	2008-10-21T09:26Z	sieving	PlotCalais02_/_Clay content - Percentage - sieving - Clay content
taxonIdCalais009	Soil acidity (pH)	5.05	nondimensional	2008-10-21T09:26Z	pH in water	PlotCalais02_/_Soil acidity (pH) - nondimensional - pH in water - Soil acidity (pH)
taxonIdCalais009	Availability of phosphorus	1.7	mg/dm3	2008-10-21T09:26Z	Extrator Mehlich 1	PlotCalais02_/_Availability of phosphorus - mg/dm3 - Extrator Mehlich 1 - Availability of phosphorus
taxonIdCalais009	Potassium availability	33	mg/dm3	2008-10-21T09:26Z	Extrator Mehlich 1	PlotCalais02_/_Potassium availability - mg/dm3 - Extrator Mehlich 1 - Potassium availability
taxonIdCalais009	Calcium availability	0.33	cmolc/dm3	2008-10-21T09:26Z	Extractor KCl 1mol/L	PlotCalais02_/_Calcium availability - cmolc/dm3 - Extractor KCl 1mol/L - Calcium availability
taxonIdCalais009	Magnesium availability	0.12	cmolc/dm3	2008-10-21T09:26Z	Extractor KCl 1mol/L	PlotCalais02_/_Magnesium availability - cmolc/dm3 - Extractor KCl 1mol/L - Magnesium availability
taxonIdCalais009	Aluminium avalaibility	1.18	cmolc/dm3	2008-10-21T09:26Z	Extractor KCl 1mol/L	PlotCalais02_/_Aluminium avalaibility - cmolc/dm3 - Extractor KCl 1mol/L - Aluminium avalaibility
taxonIdCalais009	Potential Acidity (H+AL)	4.9	cmolc/dm3	2008-10-21T09:26Z	Extractor Ca(CH3COO)2, 0.5mol/L, pH 7.0	PlotCalais02_/_Potential acidity (H+Al) - cmolc/dm3 - Extractor Ca(CH3COO)2, 0.5mol/L, pH 7.0 - Potential acidity (H+Al)
taxonIdCalais009	Interchangeable Bases	0.53	cmolc/dm3	2008-10-21T09:26Z	Interchangeable bases	PlotCalais02_/_Interchangeable bases - cmolc/dm3 - Interchangeable bases - Sum of Interchangeable bases
taxonIdCalais009	Effective cation exchange capacity	1.71	cmolc/dm3	2008-10-21T09:26Z	Effective cation exchange capacity	PlotCalais02_/_Effective cation exchange capacity - cmolc/dm3 - Effective cation exchange capacity - Effective cation exchange capacity
taxonIdCalais009	Cation exchange capacity at pH 7.0	5.43	cmolc/dm3	2008-10-21T09:26Z	Cation exchange capacity at pH 7.0	PlotCalais02_/_Cation exchange capacity at pH 7.0 - cmolc/dm3 - Cation exchange capacity at pH 7.0 - Cation exchange capacity at pH 7.0
taxonIdCalais009	Saturation of bases	9.8	Percentage	2008-10-21T09:26Z	Saturation of bases	PlotCalais02_/_Saturation of bases - Percentage - Saturation of bases - Saturation of bases
taxonIdCalais009	Saturation of aluminium	69	Percentage	2008-10-21T09:26Z	Saturation of aluminium	PlotCalais02_/_Saturation of aluminium - Percentage - Saturation of aluminium - Saturation of aluminium
taxonIdCalais009	Remaining phosphorus	38	mg/L	2008-10-21T09:26Z	Extraction with 0.01 mol/L CaCl2	PlotCalais02_/_Remaining phosphorus - mg/L - Remaining phosphorus - Remaining phosphorus
taxonIdCalais009	Rocky outcrops	5	Percentage	2008-10-21T09:26Z	Estimation	PlotCalais02_/_Rocky outcrops - Percentage - Estimation - Rocky outcrops
taxonIdCalais009	Inclination	5	Percentage	2008-10-21T09:26Z	Estimation	PlotCalais02_/_Inclination - Percentage - Estimation - Inclination
taxonIdCalais010	Coarse sand content	33	Percentage	2008-10-21T09:26Z	sieving	PlotCalais02_/_Coarse sand content - Percentage - sieving - Coarse sand content
taxonIdCalais010	Fine sand content	37	Percentage	2008-10-21T09:26Z	sieving	PlotCalais02_/_Fine sand content - Percentage - sieving - Fine sand content
taxonIdCalais010	Silt content	18	Percentage	2008-10-21T09:26Z	sieving	PlotCalais02_/_Silt content - Percentage - sieving - Silt content
taxonIdCalais010	Clay content	12	Percentage	2008-10-21T09:26Z	sieving	PlotCalais02_/_Clay content - Percentage - sieving - Clay content
taxonIdCalais010	Soil acidity (pH)	5.05	nondimensional	2008-10-21T09:26Z	pH in water	PlotCalais02_/_Soil acidity (pH) - nondimensional - pH in water - Soil acidity (pH)
taxonIdCalais010	Availability of phosphorus	1.7	mg/dm3	2008-10-21T09:26Z	Extrator Mehlich 1	PlotCalais02_/_Availability of phosphorus - mg/dm3 - Extrator Mehlich 1 - Availability of phosphorus
taxonIdCalais010	Potassium availability	33	mg/dm3	2008-10-21T09:26Z	Extrator Mehlich 1	PlotCalais02_/_Potassium availability - mg/dm3 - Extrator Mehlich 1 - Potassium availability
taxonIdCalais010	Calcium availability	0.33	cmolc/dm3	2008-10-21T09:26Z	Extractor KCl 1mol/L	PlotCalais02_/_Calcium availability - cmolc/dm3 - Extractor KCl 1mol/L - Calcium availability
taxonIdCalais010	Magnesium availability	0.12	cmolc/dm3	2008-10-21T09:26Z	Extractor KCl 1mol/L	PlotCalais02_/_Magnesium availability - cmolc/dm3 - Extractor KCl 1mol/L - Magnesium availability
taxonIdCalais010	Aluminium avalaibility	1.18	cmolc/dm3	2008-10-21T09:26Z	Extractor KCl 1mol/L	PlotCalais02_/_Aluminium avalaibility - cmolc/dm3 - Extractor KCl 1mol/L - Aluminium avalaibility
taxonIdCalais010	Potential Acidity (H+AL)	4.9	cmolc/dm3	2008-10-21T09:26Z	Extractor Ca(CH3COO)2, 0.5mol/L, pH 7.0	PlotCalais02_/_Potential acidity (H+Al) - cmolc/dm3 - Extractor Ca(CH3COO)2, 0.5mol/L, pH 7.0 - Potential acidity (H+Al)
taxonIdCalais010	Interchangeable Bases	0.53	cmolc/dm3	2008-10-21T09:26Z	Interchangeable bases	PlotCalais02_/_Interchangeable bases - cmolc/dm3 - Interchangeable bases - Sum of Interchangeable bases
taxonIdCalais010	Effective cation exchange capacity	1.71	cmolc/dm3	2008-10-21T09:26Z	Effective cation exchange capacity	PlotCalais02_/_Effective cation exchange capacity - cmolc/dm3 - Effective cation exchange capacity - Effective cation exchange capacity
taxonIdCalais010	Cation exchange capacity at pH 7.0	5.43	cmolc/dm3	2008-10-21T09:26Z	Cation exchange capacity at pH 7.0	PlotCalais02_/_Cation exchange capacity at pH 7.0 - cmolc/dm3 - Cation exchange capacity at pH 7.0 - Cation exchange capacity at pH 7.0
taxonIdCalais010	Saturation of bases	9.8	Percentage	2008-10-21T09:26Z	Saturation of bases	PlotCalais02_/_Saturation of bases - Percentage - Saturation of bases - Saturation of bases
taxonIdCalais010	Saturation of aluminium	69	Percentage	2008-10-21T09:26Z	Saturation of aluminium	PlotCalais02_/_Saturation of aluminium - Percentage - Saturation of aluminium - Saturation of aluminium
taxonIdCalais010	Remaining phosphorus	38	mg/L	2008-10-21T09:26Z	Extraction with 0.01 mol/L CaCl2	PlotCalais02_/_Remaining phosphorus - mg/L - Remaining phosphorus - Remaining phosphorus
taxonIdCalais010	Rocky outcrops	5	Percentage	2008-10-21T09:26Z	Estimation	PlotCalais02_/_Rocky outcrops - Percentage - Estimation - Rocky outcrops
taxonIdCalais010	Inclination	5	Percentage	2008-10-21T09:26Z	Estimation	PlotCalais02_/_Inclination - Percentage - Estimation - Inclination
taxonIdCalais011	Coarse sand content	33	Percentage	2008-10-21T09:26Z	sieving	PlotCalais02_/_Coarse sand content - Percentage - sieving - Coarse sand content
taxonIdCalais011	Fine sand content	37	Percentage	2008-10-21T09:26Z	sieving	PlotCalais02_/_Fine sand content - Percentage - sieving - Fine sand content
taxonIdCalais011	Silt content	18	Percentage	2008-10-21T09:26Z	sieving	PlotCalais02_/_Silt content - Percentage - sieving - Silt content
taxonIdCalais011	Clay content	12	Percentage	2008-10-21T09:26Z	sieving	PlotCalais02_/_Clay content - Percentage - sieving - Clay content
taxonIdCalais011	Soil acidity (pH)	5.05	nondimensional	2008-10-21T09:26Z	pH in water	PlotCalais02_/_Soil acidity (pH) - nondimensional - pH in water - Soil acidity (pH)
taxonIdCalais011	Availability of phosphorus	1.7	mg/dm3	2008-10-21T09:26Z	Extrator Mehlich 1	PlotCalais02_/_Availability of phosphorus - mg/dm3 - Extrator Mehlich 1 - Availability of phosphorus
taxonIdCalais011	Potassium availability	33	mg/dm3	2008-10-21T09:26Z	Extrator Mehlich 1	PlotCalais02_/_Potassium availability - mg/dm3 - Extrator Mehlich 1 - Potassium availability
taxonIdCalais011	Calcium availability	0.33	cmolc/dm3	2008-10-21T09:26Z	Extractor KCl 1mol/L	PlotCalais02_/_Calcium availability - cmolc/dm3 - Extractor KCl 1mol/L - Calcium availability
taxonIdCalais011	Magnesium availability	0.12	cmolc/dm3	2008-10-21T09:26Z	Extractor KCl 1mol/L	PlotCalais02_/_Magnesium availability - cmolc/dm3 - Extractor KCl 1mol/L - Magnesium availability
taxonIdCalais011	Aluminium avalaibility	1.18	cmolc/dm3	2008-10-21T09:26Z	Extractor KCl 1mol/L	PlotCalais02_/_Aluminium avalaibility - cmolc/dm3 - Extractor KCl 1mol/L - Aluminium avalaibility
taxonIdCalais011	Potential Acidity (H+AL)	4.9	cmolc/dm3	2008-10-21T09:26Z	Extractor Ca(CH3COO)2, 0.5mol/L, pH 7.0	PlotCalais02_/_Potential acidity (H+Al) - cmolc/dm3 - Extractor Ca(CH3COO)2, 0.5mol/L, pH 7.0 - Potential acidity (H+Al)
taxonIdCalais011	Interchangeable Bases	0.53	cmolc/dm3	2008-10-21T09:26Z	Interchangeable bases	PlotCalais02_/_Interchangeable bases - cmolc/dm3 - Interchangeable bases - Sum of Interchangeable bases
taxonIdCalais011	Effective cation exchange capacity	1.71	cmolc/dm3	2008-10-21T09:26Z	Effective cation exchange capacity	PlotCalais02_/_Effective cation exchange capacity - cmolc/dm3 - Effective cation exchange capacity - Effective cation exchange capacity
taxonIdCalais011	Cation exchange capacity at pH 7.0	5.43	cmolc/dm3	2008-10-21T09:26Z	Cation exchange capacity at pH 7.0	PlotCalais02_/_Cation exchange capacity at pH 7.0 - cmolc/dm3 - Cation exchange capacity at pH 7.0 - Cation exchange capacity at pH 7.0
taxonIdCalais011	Saturation of bases	9.8	Percentage	2008-10-21T09:26Z	Saturation of bases	PlotCalais02_/_Saturation of bases - Percentage - Saturation of bases - Saturation of bases
taxonIdCalais011	Saturation of aluminium	69	Percentage	2008-10-21T09:26Z	Saturation of aluminium	PlotCalais02_/_Saturation of aluminium - Percentage - Saturation of aluminium - Saturation of aluminium
taxonIdCalais011	Remaining phosphorus	38	mg/L	2008-10-21T09:26Z	Extraction with 0.01 mol/L CaCl2	PlotCalais02_/_Remaining phosphorus - mg/L - Remaining phosphorus - Remaining phosphorus
taxonIdCalais011	Rocky outcrops	5	Percentage	2008-10-21T09:26Z	Estimation	PlotCalais02_/_Rocky outcrops - Percentage - Estimation - Rocky outcrops
taxonIdCalais011	Inclination	5	Percentage	2008-10-21T09:26Z	Estimation	PlotCalais02_/_Inclination - Percentage - Estimation - Inclination
taxonIdCalais015	Coarse sand content	33	Percentage	2008-10-21T09:26Z	sieving	PlotCalais02_/_Coarse sand content - Percentage - sieving - Coarse sand content
taxonIdCalais015	Fine sand content	37	Percentage	2008-10-21T09:26Z	sieving	PlotCalais02_/_Fine sand content - Percentage - sieving - Fine sand content
taxonIdCalais015	Silt content	18	Percentage	2008-10-21T09:26Z	sieving	PlotCalais02_/_Silt content - Percentage - sieving - Silt content
taxonIdCalais015	Clay content	12	Percentage	2008-10-21T09:26Z	sieving	PlotCalais02_/_Clay content - Percentage - sieving - Clay content
taxonIdCalais015	Soil acidity (pH)	5.05	nondimensional	2008-10-21T09:26Z	pH in water	PlotCalais02_/_Soil acidity (pH) - nondimensional - pH in water - Soil acidity (pH)
taxonIdCalais015	Availability of phosphorus	1.7	mg/dm3	2008-10-21T09:26Z	Extrator Mehlich 1	PlotCalais02_/_Availability of phosphorus - mg/dm3 - Extrator Mehlich 1 - Availability of phosphorus
taxonIdCalais015	Potassium availability	33	mg/dm3	2008-10-21T09:26Z	Extrator Mehlich 1	PlotCalais02_/_Potassium availability - mg/dm3 - Extrator Mehlich 1 - Potassium availability
taxonIdCalais015	Calcium availability	0.33	cmolc/dm3	2008-10-21T09:26Z	Extractor KCl 1mol/L	PlotCalais02_/_Calcium availability - cmolc/dm3 - Extractor KCl 1mol/L - Calcium availability
taxonIdCalais015	Magnesium availability	0.12	cmolc/dm3	2008-10-21T09:26Z	Extractor KCl 1mol/L	PlotCalais02_/_Magnesium availability - cmolc/dm3 - Extractor KCl 1mol/L - Magnesium availability
taxonIdCalais015	Aluminium avalaibility	1.18	cmolc/dm3	2008-10-21T09:26Z	Extractor KCl 1mol/L	PlotCalais02_/_Aluminium avalaibility - cmolc/dm3 - Extractor KCl 1mol/L - Aluminium avalaibility
taxonIdCalais015	Potential Acidity (H+AL)	4.9	cmolc/dm3	2008-10-21T09:26Z	Extractor Ca(CH3COO)2, 0.5mol/L, pH 7.0	PlotCalais02_/_Potential acidity (H+Al) - cmolc/dm3 - Extractor Ca(CH3COO)2, 0.5mol/L, pH 7.0 - Potential acidity (H+Al)
taxonIdCalais015	Interchangeable Bases	0.53	cmolc/dm3	2008-10-21T09:26Z	Interchangeable bases	PlotCalais02_/_Interchangeable bases - cmolc/dm3 - Interchangeable bases - Sum of Interchangeable bases
taxonIdCalais015	Effective cation exchange capacity	1.71	cmolc/dm3	2008-10-21T09:26Z	Effective cation exchange capacity	PlotCalais02_/_Effective cation exchange capacity - cmolc/dm3 - Effective cation exchange capacity - Effective cation exchange capacity
taxonIdCalais015	Cation exchange capacity at pH 7.0	5.43	cmolc/dm3	2008-10-21T09:26Z	Cation exchange capacity at pH 7.0	PlotCalais02_/_Cation exchange capacity at pH 7.0 - cmolc/dm3 - Cation exchange capacity at pH 7.0 - Cation exchange capacity at pH 7.0
taxonIdCalais015	Saturation of bases	9.8	Percentage	2008-10-21T09:26Z	Saturation of bases	PlotCalais02_/_Saturation of bases - Percentage - Saturation of bases - Saturation of bases
taxonIdCalais015	Saturation of aluminium	69	Percentage	2008-10-21T09:26Z	Saturation of aluminium	PlotCalais02_/_Saturation of aluminium - Percentage - Saturation of aluminium - Saturation of aluminium
taxonIdCalais015	Remaining phosphorus	38	mg/L	2008-10-21T09:26Z	Extraction with 0.01 mol/L CaCl2	PlotCalais02_/_Remaining phosphorus - mg/L - Remaining phosphorus - Remaining phosphorus
taxonIdCalais015	Rocky outcrops	5	Percentage	2008-10-21T09:26Z	Estimation	PlotCalais02_/_Rocky outcrops - Percentage - Estimation - Rocky outcrops
taxonIdCalais015	Inclination	5	Percentage	2008-10-21T09:26Z	Estimation	PlotCalais02_/_Inclination - Percentage - Estimation - Inclination
taxonIdCalais016	Coarse sand content	33	Percentage	2008-10-21T09:26Z	sieving	PlotCalais02_/_Coarse sand content - Percentage - sieving - Coarse sand content
taxonIdCalais016	Fine sand content	37	Percentage	2008-10-21T09:26Z	sieving	PlotCalais02_/_Fine sand content - Percentage - sieving - Fine sand content
taxonIdCalais016	Silt content	18	Percentage	2008-10-21T09:26Z	sieving	PlotCalais02_/_Silt content - Percentage - sieving - Silt content
taxonIdCalais016	Clay content	12	Percentage	2008-10-21T09:26Z	sieving	PlotCalais02_/_Clay content - Percentage - sieving - Clay content
taxonIdCalais016	Soil acidity (pH)	5.05	nondimensional	2008-10-21T09:26Z	pH in water	PlotCalais02_/_Soil acidity (pH) - nondimensional - pH in water - Soil acidity (pH)
taxonIdCalais016	Availability of phosphorus	1.7	mg/dm3	2008-10-21T09:26Z	Extrator Mehlich 1	PlotCalais02_/_Availability of phosphorus - mg/dm3 - Extrator Mehlich 1 - Availability of phosphorus
taxonIdCalais016	Potassium availability	33	mg/dm3	2008-10-21T09:26Z	Extrator Mehlich 1	PlotCalais02_/_Potassium availability - mg/dm3 - Extrator Mehlich 1 - Potassium availability
taxonIdCalais016	Calcium availability	0.33	cmolc/dm3	2008-10-21T09:26Z	Extractor KCl 1mol/L	PlotCalais02_/_Calcium availability - cmolc/dm3 - Extractor KCl 1mol/L - Calcium availability
taxonIdCalais016	Magnesium availability	0.12	cmolc/dm3	2008-10-21T09:26Z	Extractor KCl 1mol/L	PlotCalais02_/_Magnesium availability - cmolc/dm3 - Extractor KCl 1mol/L - Magnesium availability
taxonIdCalais016	Aluminium avalaibility	1.18	cmolc/dm3	2008-10-21T09:26Z	Extractor KCl 1mol/L	PlotCalais02_/_Aluminium avalaibility - cmolc/dm3 - Extractor KCl 1mol/L - Aluminium avalaibility
taxonIdCalais016	Potential Acidity (H+AL)	4.9	cmolc/dm3	2008-10-21T09:26Z	Extractor Ca(CH3COO)2, 0.5mol/L, pH 7.0	PlotCalais02_/_Potential acidity (H+Al) - cmolc/dm3 - Extractor Ca(CH3COO)2, 0.5mol/L, pH 7.0 - Potential acidity (H+Al)
taxonIdCalais016	Interchangeable Bases	0.53	cmolc/dm3	2008-10-21T09:26Z	Interchangeable bases	PlotCalais02_/_Interchangeable bases - cmolc/dm3 - Interchangeable bases - Sum of Interchangeable bases
taxonIdCalais016	Effective cation exchange capacity	1.71	cmolc/dm3	2008-10-21T09:26Z	Effective cation exchange capacity	PlotCalais02_/_Effective cation exchange capacity - cmolc/dm3 - Effective cation exchange capacity - Effective cation exchange capacity
taxonIdCalais016	Cation exchange capacity at pH 7.0	5.43	cmolc/dm3	2008-10-21T09:26Z	Cation exchange capacity at pH 7.0	PlotCalais02_/_Cation exchange capacity at pH 7.0 - cmolc/dm3 - Cation exchange capacity at pH 7.0 - Cation exchange capacity at pH 7.0
taxonIdCalais016	Saturation of bases	9.8	Percentage	2008-10-21T09:26Z	Saturation of bases	PlotCalais02_/_Saturation of bases - Percentage - Saturation of bases - Saturation of bases
taxonIdCalais016	Saturation of aluminium	69	Percentage	2008-10-21T09:26Z	Saturation of aluminium	PlotCalais02_/_Saturation of aluminium - Percentage - Saturation of aluminium - Saturation of aluminium
taxonIdCalais016	Remaining phosphorus	38	mg/L	2008-10-21T09:26Z	Extraction with 0.01 mol/L CaCl2	PlotCalais02_/_Remaining phosphorus - mg/L - Remaining phosphorus - Remaining phosphorus
taxonIdCalais016	Rocky outcrops	5	Percentage	2008-10-21T09:26Z	Estimation	PlotCalais02_/_Rocky outcrops - Percentage - Estimation - Rocky outcrops
taxonIdCalais016	Inclination	5	Percentage	2008-10-21T09:26Z	Estimation	PlotCalais02_/_Inclination - Percentage - Estimation - Inclination
taxonIdCalais017	Coarse sand content	33	Percentage	2008-10-21T09:26Z	sieving	PlotCalais02_/_Coarse sand content - Percentage - sieving - Coarse sand content
taxonIdCalais017	Fine sand content	37	Percentage	2008-10-21T09:26Z	sieving	PlotCalais02_/_Fine sand content - Percentage - sieving - Fine sand content
taxonIdCalais017	Silt content	18	Percentage	2008-10-21T09:26Z	sieving	PlotCalais02_/_Silt content - Percentage - sieving - Silt content
taxonIdCalais017	Clay content	12	Percentage	2008-10-21T09:26Z	sieving	PlotCalais02_/_Clay content - Percentage - sieving - Clay content
taxonIdCalais017	Soil acidity (pH)	5.05	nondimensional	2008-10-21T09:26Z	pH in water	PlotCalais02_/_Soil acidity (pH) - nondimensional - pH in water - Soil acidity (pH)
taxonIdCalais017	Availability of phosphorus	1.7	mg/dm3	2008-10-21T09:26Z	Extrator Mehlich 1	PlotCalais02_/_Availability of phosphorus - mg/dm3 - Extrator Mehlich 1 - Availability of phosphorus
taxonIdCalais017	Potassium availability	33	mg/dm3	2008-10-21T09:26Z	Extrator Mehlich 1	PlotCalais02_/_Potassium availability - mg/dm3 - Extrator Mehlich 1 - Potassium availability
taxonIdCalais017	Calcium availability	0.33	cmolc/dm3	2008-10-21T09:26Z	Extractor KCl 1mol/L	PlotCalais02_/_Calcium availability - cmolc/dm3 - Extractor KCl 1mol/L - Calcium availability
taxonIdCalais017	Magnesium availability	0.12	cmolc/dm3	2008-10-21T09:26Z	Extractor KCl 1mol/L	PlotCalais02_/_Magnesium availability - cmolc/dm3 - Extractor KCl 1mol/L - Magnesium availability
taxonIdCalais017	Aluminium avalaibility	1.18	cmolc/dm3	2008-10-21T09:26Z	Extractor KCl 1mol/L	PlotCalais02_/_Aluminium avalaibility - cmolc/dm3 - Extractor KCl 1mol/L - Aluminium avalaibility
taxonIdCalais017	Potential Acidity (H+AL)	4.9	cmolc/dm3	2008-10-21T09:26Z	Extractor Ca(CH3COO)2, 0.5mol/L, pH 7.0	PlotCalais02_/_Potential acidity (H+Al) - cmolc/dm3 - Extractor Ca(CH3COO)2, 0.5mol/L, pH 7.0 - Potential acidity (H+Al)
taxonIdCalais017	Interchangeable Bases	0.53	cmolc/dm3	2008-10-21T09:26Z	Interchangeable bases	PlotCalais02_/_Interchangeable bases - cmolc/dm3 - Interchangeable bases - Sum of Interchangeable bases
taxonIdCalais017	Effective cation exchange capacity	1.71	cmolc/dm3	2008-10-21T09:26Z	Effective cation exchange capacity	PlotCalais02_/_Effective cation exchange capacity - cmolc/dm3 - Effective cation exchange capacity - Effective cation exchange capacity
taxonIdCalais017	Cation exchange capacity at pH 7.0	5.43	cmolc/dm3	2008-10-21T09:26Z	Cation exchange capacity at pH 7.0	PlotCalais02_/_Cation exchange capacity at pH 7.0 - cmolc/dm3 - Cation exchange capacity at pH 7.0 - Cation exchange capacity at pH 7.0
taxonIdCalais017	Saturation of bases	9.8	Percentage	2008-10-21T09:26Z	Saturation of bases	PlotCalais02_/_Saturation of bases - Percentage - Saturation of bases - Saturation of bases
taxonIdCalais017	Saturation of aluminium	69	Percentage	2008-10-21T09:26Z	Saturation of aluminium	PlotCalais02_/_Saturation of aluminium - Percentage - Saturation of aluminium - Saturation of aluminium
taxonIdCalais017	Remaining phosphorus	38	mg/L	2008-10-21T09:26Z	Extraction with 0.01 mol/L CaCl2	PlotCalais02_/_Remaining phosphorus - mg/L - Remaining phosphorus - Remaining phosphorus
taxonIdCalais017	Rocky outcrops	5	Percentage	2008-10-21T09:26Z	Estimation	PlotCalais02_/_Rocky outcrops - Percentage - Estimation - Rocky outcrops
taxonIdCalais017	Inclination	5	Percentage	2008-10-21T09:26Z	Estimation	PlotCalais02_/_Inclination - Percentage - Estimation - Inclination
taxonIdCalais021	Coarse sand content	33	Percentage	2008-10-21T09:26Z	sieving	PlotCalais02_/_Coarse sand content - Percentage - sieving - Coarse sand content
taxonIdCalais021	Fine sand content	37	Percentage	2008-10-21T09:26Z	sieving	PlotCalais02_/_Fine sand content - Percentage - sieving - Fine sand content
taxonIdCalais021	Silt content	18	Percentage	2008-10-21T09:26Z	sieving	PlotCalais02_/_Silt content - Percentage - sieving - Silt content
taxonIdCalais021	Clay content	12	Percentage	2008-10-21T09:26Z	sieving	PlotCalais02_/_Clay content - Percentage - sieving - Clay content
taxonIdCalais021	Soil acidity (pH)	5.05	nondimensional	2008-10-21T09:26Z	pH in water	PlotCalais02_/_Soil acidity (pH) - nondimensional - pH in water - Soil acidity (pH)
taxonIdCalais021	Availability of phosphorus	1.7	mg/dm3	2008-10-21T09:26Z	Extrator Mehlich 1	PlotCalais02_/_Availability of phosphorus - mg/dm3 - Extrator Mehlich 1 - Availability of phosphorus
taxonIdCalais021	Potassium availability	33	mg/dm3	2008-10-21T09:26Z	Extrator Mehlich 1	PlotCalais02_/_Potassium availability - mg/dm3 - Extrator Mehlich 1 - Potassium availability
taxonIdCalais021	Calcium availability	0.33	cmolc/dm3	2008-10-21T09:26Z	Extractor KCl 1mol/L	PlotCalais02_/_Calcium availability - cmolc/dm3 - Extractor KCl 1mol/L - Calcium availability
taxonIdCalais021	Magnesium availability	0.12	cmolc/dm3	2008-10-21T09:26Z	Extractor KCl 1mol/L	PlotCalais02_/_Magnesium availability - cmolc/dm3 - Extractor KCl 1mol/L - Magnesium availability
taxonIdCalais021	Aluminium avalaibility	1.18	cmolc/dm3	2008-10-21T09:26Z	Extractor KCl 1mol/L	PlotCalais02_/_Aluminium avalaibility - cmolc/dm3 - Extractor KCl 1mol/L - Aluminium avalaibility
taxonIdCalais021	Potential Acidity (H+AL)	4.9	cmolc/dm3	2008-10-21T09:26Z	Extractor Ca(CH3COO)2, 0.5mol/L, pH 7.0	PlotCalais02_/_Potential acidity (H+Al) - cmolc/dm3 - Extractor Ca(CH3COO)2, 0.5mol/L, pH 7.0 - Potential acidity (H+Al)
taxonIdCalais021	Interchangeable Bases	0.53	cmolc/dm3	2008-10-21T09:26Z	Interchangeable bases	PlotCalais02_/_Interchangeable bases - cmolc/dm3 - Interchangeable bases - Sum of Interchangeable bases
taxonIdCalais021	Effective cation exchange capacity	1.71	cmolc/dm3	2008-10-21T09:26Z	Effective cation exchange capacity	PlotCalais02_/_Effective cation exchange capacity - cmolc/dm3 - Effective cation exchange capacity - Effective cation exchange capacity
taxonIdCalais021	Cation exchange capacity at pH 7.0	5.43	cmolc/dm3	2008-10-21T09:26Z	Cation exchange capacity at pH 7.0	PlotCalais02_/_Cation exchange capacity at pH 7.0 - cmolc/dm3 - Cation exchange capacity at pH 7.0 - Cation exchange capacity at pH 7.0
taxonIdCalais021	Saturation of bases	9.8	Percentage	2008-10-21T09:26Z	Saturation of bases	PlotCalais02_/_Saturation of bases - Percentage - Saturation of bases - Saturation of bases
taxonIdCalais021	Saturation of aluminium	69	Percentage	2008-10-21T09:26Z	Saturation of aluminium	PlotCalais02_/_Saturation of aluminium - Percentage - Saturation of aluminium - Saturation of aluminium
taxonIdCalais021	Remaining phosphorus	38	mg/L	2008-10-21T09:26Z	Extraction with 0.01 mol/L CaCl2	PlotCalais02_/_Remaining phosphorus - mg/L - Remaining phosphorus - Remaining phosphorus
taxonIdCalais021	Rocky outcrops	5	Percentage	2008-10-21T09:26Z	Estimation	PlotCalais02_/_Rocky outcrops - Percentage - Estimation - Rocky outcrops
taxonIdCalais021	Inclination	5	Percentage	2008-10-21T09:26Z	Estimation	PlotCalais02_/_Inclination - Percentage - Estimation - Inclination
taxonIdCalais022	Coarse sand content	33	Percentage	2008-10-21T09:26Z	sieving	PlotCalais02_/_Coarse sand content - Percentage - sieving - Coarse sand content
taxonIdCalais022	Fine sand content	37	Percentage	2008-10-21T09:26Z	sieving	PlotCalais02_/_Fine sand content - Percentage - sieving - Fine sand content
taxonIdCalais022	Silt content	18	Percentage	2008-10-21T09:26Z	sieving	PlotCalais02_/_Silt content - Percentage - sieving - Silt content
taxonIdCalais022	Clay content	12	Percentage	2008-10-21T09:26Z	sieving	PlotCalais02_/_Clay content - Percentage - sieving - Clay content
taxonIdCalais022	Soil acidity (pH)	5.05	nondimensional	2008-10-21T09:26Z	pH in water	PlotCalais02_/_Soil acidity (pH) - nondimensional - pH in water - Soil acidity (pH)
taxonIdCalais022	Availability of phosphorus	1.7	mg/dm3	2008-10-21T09:26Z	Extrator Mehlich 1	PlotCalais02_/_Availability of phosphorus - mg/dm3 - Extrator Mehlich 1 - Availability of phosphorus
taxonIdCalais022	Potassium availability	33	mg/dm3	2008-10-21T09:26Z	Extrator Mehlich 1	PlotCalais02_/_Potassium availability - mg/dm3 - Extrator Mehlich 1 - Potassium availability
taxonIdCalais022	Calcium availability	0.33	cmolc/dm3	2008-10-21T09:26Z	Extractor KCl 1mol/L	PlotCalais02_/_Calcium availability - cmolc/dm3 - Extractor KCl 1mol/L - Calcium availability
taxonIdCalais022	Magnesium availability	0.12	cmolc/dm3	2008-10-21T09:26Z	Extractor KCl 1mol/L	PlotCalais02_/_Magnesium availability - cmolc/dm3 - Extractor KCl 1mol/L - Magnesium availability
taxonIdCalais022	Aluminium avalaibility	1.18	cmolc/dm3	2008-10-21T09:26Z	Extractor KCl 1mol/L	PlotCalais02_/_Aluminium avalaibility - cmolc/dm3 - Extractor KCl 1mol/L - Aluminium avalaibility
taxonIdCalais022	Potential Acidity (H+AL)	4.9	cmolc/dm3	2008-10-21T09:26Z	Extractor Ca(CH3COO)2, 0.5mol/L, pH 7.0	PlotCalais02_/_Potential acidity (H+Al) - cmolc/dm3 - Extractor Ca(CH3COO)2, 0.5mol/L, pH 7.0 - Potential acidity (H+Al)
taxonIdCalais022	Interchangeable Bases	0.53	cmolc/dm3	2008-10-21T09:26Z	Interchangeable bases	PlotCalais02_/_Interchangeable bases - cmolc/dm3 - Interchangeable bases - Sum of Interchangeable bases
taxonIdCalais022	Effective cation exchange capacity	1.71	cmolc/dm3	2008-10-21T09:26Z	Effective cation exchange capacity	PlotCalais02_/_Effective cation exchange capacity - cmolc/dm3 - Effective cation exchange capacity - Effective cation exchange capacity
taxonIdCalais022	Cation exchange capacity at pH 7.0	5.43	cmolc/dm3	2008-10-21T09:26Z	Cation exchange capacity at pH 7.0	PlotCalais02_/_Cation exchange capacity at pH 7.0 - cmolc/dm3 - Cation exchange capacity at pH 7.0 - Cation exchange capacity at pH 7.0
taxonIdCalais022	Saturation of bases	9.8	Percentage	2008-10-21T09:26Z	Saturation of bases	PlotCalais02_/_Saturation of bases - Percentage - Saturation of bases - Saturation of bases
taxonIdCalais022	Saturation of aluminium	69	Percentage	2008-10-21T09:26Z	Saturation of aluminium	PlotCalais02_/_Saturation of aluminium - Percentage - Saturation of aluminium - Saturation of aluminium
taxonIdCalais022	Remaining phosphorus	38	mg/L	2008-10-21T09:26Z	Extraction with 0.01 mol/L CaCl2	PlotCalais02_/_Remaining phosphorus - mg/L - Remaining phosphorus - Remaining phosphorus
taxonIdCalais022	Rocky outcrops	5	Percentage	2008-10-21T09:26Z	Estimation	PlotCalais02_/_Rocky outcrops - Percentage - Estimation - Rocky outcrops
taxonIdCalais022	Inclination	5	Percentage	2008-10-21T09:26Z	Estimation	PlotCalais02_/_Inclination - Percentage - Estimation - Inclination
taxonIdCalais023	Coarse sand content	33	Percentage	2008-10-21T09:26Z	sieving	PlotCalais02_/_Coarse sand content - Percentage - sieving - Coarse sand content
taxonIdCalais023	Fine sand content	37	Percentage	2008-10-21T09:26Z	sieving	PlotCalais02_/_Fine sand content - Percentage - sieving - Fine sand content
taxonIdCalais023	Silt content	18	Percentage	2008-10-21T09:26Z	sieving	PlotCalais02_/_Silt content - Percentage - sieving - Silt content
taxonIdCalais023	Clay content	12	Percentage	2008-10-21T09:26Z	sieving	PlotCalais02_/_Clay content - Percentage - sieving - Clay content
taxonIdCalais023	Soil acidity (pH)	5.05	nondimensional	2008-10-21T09:26Z	pH in water	PlotCalais02_/_Soil acidity (pH) - nondimensional - pH in water - Soil acidity (pH)
taxonIdCalais023	Availability of phosphorus	1.7	mg/dm3	2008-10-21T09:26Z	Extrator Mehlich 1	PlotCalais02_/_Availability of phosphorus - mg/dm3 - Extrator Mehlich 1 - Availability of phosphorus
taxonIdCalais023	Potassium availability	33	mg/dm3	2008-10-21T09:26Z	Extrator Mehlich 1	PlotCalais02_/_Potassium availability - mg/dm3 - Extrator Mehlich 1 - Potassium availability
taxonIdCalais023	Calcium availability	0.33	cmolc/dm3	2008-10-21T09:26Z	Extractor KCl 1mol/L	PlotCalais02_/_Calcium availability - cmolc/dm3 - Extractor KCl 1mol/L - Calcium availability
taxonIdCalais023	Magnesium availability	0.12	cmolc/dm3	2008-10-21T09:26Z	Extractor KCl 1mol/L	PlotCalais02_/_Magnesium availability - cmolc/dm3 - Extractor KCl 1mol/L - Magnesium availability
taxonIdCalais023	Aluminium avalaibility	1.18	cmolc/dm3	2008-10-21T09:26Z	Extractor KCl 1mol/L	PlotCalais02_/_Aluminium avalaibility - cmolc/dm3 - Extractor KCl 1mol/L - Aluminium avalaibility
taxonIdCalais023	Potential Acidity (H+AL)	4.9	cmolc/dm3	2008-10-21T09:26Z	Extractor Ca(CH3COO)2, 0.5mol/L, pH 7.0	PlotCalais02_/_Potential acidity (H+Al) - cmolc/dm3 - Extractor Ca(CH3COO)2, 0.5mol/L, pH 7.0 - Potential acidity (H+Al)
taxonIdCalais023	Interchangeable Bases	0.53	cmolc/dm3	2008-10-21T09:26Z	Interchangeable bases	PlotCalais02_/_Interchangeable bases - cmolc/dm3 - Interchangeable bases - Sum of Interchangeable bases
taxonIdCalais023	Effective cation exchange capacity	1.71	cmolc/dm3	2008-10-21T09:26Z	Effective cation exchange capacity	PlotCalais02_/_Effective cation exchange capacity - cmolc/dm3 - Effective cation exchange capacity - Effective cation exchange capacity
taxonIdCalais023	Cation exchange capacity at pH 7.0	5.43	cmolc/dm3	2008-10-21T09:26Z	Cation exchange capacity at pH 7.0	PlotCalais02_/_Cation exchange capacity at pH 7.0 - cmolc/dm3 - Cation exchange capacity at pH 7.0 - Cation exchange capacity at pH 7.0
taxonIdCalais023	Saturation of bases	9.8	Percentage	2008-10-21T09:26Z	Saturation of bases	PlotCalais02_/_Saturation of bases - Percentage - Saturation of bases - Saturation of bases
taxonIdCalais023	Saturation of aluminium	69	Percentage	2008-10-21T09:26Z	Saturation of aluminium	PlotCalais02_/_Saturation of aluminium - Percentage - Saturation of aluminium - Saturation of aluminium
taxonIdCalais023	Remaining phosphorus	38	mg/L	2008-10-21T09:26Z	Extraction with 0.01 mol/L CaCl2	PlotCalais02_/_Remaining phosphorus - mg/L - Remaining phosphorus - Remaining phosphorus
taxonIdCalais023	Rocky outcrops	5	Percentage	2008-10-21T09:26Z	Estimation	PlotCalais02_/_Rocky outcrops - Percentage - Estimation - Rocky outcrops
taxonIdCalais023	Inclination	5	Percentage	2008-10-21T09:26Z	Estimation	PlotCalais02_/_Inclination - Percentage - Estimation - Inclination
taxonIdCalais034	Coarse sand content	33	Percentage	2008-10-21T09:26Z	sieving	PlotCalais02_/_Coarse sand content - Percentage - sieving - Coarse sand content
taxonIdCalais034	Fine sand content	37	Percentage	2008-10-21T09:26Z	sieving	PlotCalais02_/_Fine sand content - Percentage - sieving - Fine sand content
taxonIdCalais034	Silt content	18	Percentage	2008-10-21T09:26Z	sieving	PlotCalais02_/_Silt content - Percentage - sieving - Silt content
taxonIdCalais034	Clay content	12	Percentage	2008-10-21T09:26Z	sieving	PlotCalais02_/_Clay content - Percentage - sieving - Clay content
taxonIdCalais034	Soil acidity (pH)	5.05	nondimensional	2008-10-21T09:26Z	pH in water	PlotCalais02_/_Soil acidity (pH) - nondimensional - pH in water - Soil acidity (pH)
taxonIdCalais034	Availability of phosphorus	1.7	mg/dm3	2008-10-21T09:26Z	Extrator Mehlich 1	PlotCalais02_/_Availability of phosphorus - mg/dm3 - Extrator Mehlich 1 - Availability of phosphorus
taxonIdCalais034	Potassium availability	33	mg/dm3	2008-10-21T09:26Z	Extrator Mehlich 1	PlotCalais02_/_Potassium availability - mg/dm3 - Extrator Mehlich 1 - Potassium availability
taxonIdCalais034	Calcium availability	0.33	cmolc/dm3	2008-10-21T09:26Z	Extractor KCl 1mol/L	PlotCalais02_/_Calcium availability - cmolc/dm3 - Extractor KCl 1mol/L - Calcium availability
taxonIdCalais034	Magnesium availability	0.12	cmolc/dm3	2008-10-21T09:26Z	Extractor KCl 1mol/L	PlotCalais02_/_Magnesium availability - cmolc/dm3 - Extractor KCl 1mol/L - Magnesium availability
taxonIdCalais034	Aluminium avalaibility	1.18	cmolc/dm3	2008-10-21T09:26Z	Extractor KCl 1mol/L	PlotCalais02_/_Aluminium avalaibility - cmolc/dm3 - Extractor KCl 1mol/L - Aluminium avalaibility
taxonIdCalais034	Potential Acidity (H+AL)	4.9	cmolc/dm3	2008-10-21T09:26Z	Extractor Ca(CH3COO)2, 0.5mol/L, pH 7.0	PlotCalais02_/_Potential acidity (H+Al) - cmolc/dm3 - Extractor Ca(CH3COO)2, 0.5mol/L, pH 7.0 - Potential acidity (H+Al)
taxonIdCalais034	Interchangeable Bases	0.53	cmolc/dm3	2008-10-21T09:26Z	Interchangeable bases	PlotCalais02_/_Interchangeable bases - cmolc/dm3 - Interchangeable bases - Sum of Interchangeable bases
taxonIdCalais034	Effective cation exchange capacity	1.71	cmolc/dm3	2008-10-21T09:26Z	Effective cation exchange capacity	PlotCalais02_/_Effective cation exchange capacity - cmolc/dm3 - Effective cation exchange capacity - Effective cation exchange capacity
taxonIdCalais034	Cation exchange capacity at pH 7.0	5.43	cmolc/dm3	2008-10-21T09:26Z	Cation exchange capacity at pH 7.0	PlotCalais02_/_Cation exchange capacity at pH 7.0 - cmolc/dm3 - Cation exchange capacity at pH 7.0 - Cation exchange capacity at pH 7.0
taxonIdCalais034	Saturation of bases	9.8	Percentage	2008-10-21T09:26Z	Saturation of bases	PlotCalais02_/_Saturation of bases - Percentage - Saturation of bases - Saturation of bases
taxonIdCalais034	Saturation of aluminium	69	Percentage	2008-10-21T09:26Z	Saturation of aluminium	PlotCalais02_/_Saturation of aluminium - Percentage - Saturation of aluminium - Saturation of aluminium
taxonIdCalais034	Remaining phosphorus	38	mg/L	2008-10-21T09:26Z	Extraction with 0.01 mol/L CaCl2	PlotCalais02_/_Remaining phosphorus - mg/L - Remaining phosphorus - Remaining phosphorus
taxonIdCalais034	Rocky outcrops	5	Percentage	2008-10-21T09:26Z	Estimation	PlotCalais02_/_Rocky outcrops - Percentage - Estimation - Rocky outcrops
taxonIdCalais034	Inclination	5	Percentage	2008-10-21T09:26Z	Estimation	PlotCalais02_/_Inclination - Percentage - Estimation - Inclination
taxonIdCalais040	Coarse sand content	33	Percentage	2008-10-21T09:26Z	sieving	PlotCalais02_/_Coarse sand content - Percentage - sieving - Coarse sand content
taxonIdCalais040	Fine sand content	37	Percentage	2008-10-21T09:26Z	sieving	PlotCalais02_/_Fine sand content - Percentage - sieving - Fine sand content
taxonIdCalais040	Silt content	18	Percentage	2008-10-21T09:26Z	sieving	PlotCalais02_/_Silt content - Percentage - sieving - Silt content
taxonIdCalais040	Clay content	12	Percentage	2008-10-21T09:26Z	sieving	PlotCalais02_/_Clay content - Percentage - sieving - Clay content
taxonIdCalais040	Soil acidity (pH)	5.05	nondimensional	2008-10-21T09:26Z	pH in water	PlotCalais02_/_Soil acidity (pH) - nondimensional - pH in water - Soil acidity (pH)
taxonIdCalais040	Availability of phosphorus	1.7	mg/dm3	2008-10-21T09:26Z	Extrator Mehlich 1	PlotCalais02_/_Availability of phosphorus - mg/dm3 - Extrator Mehlich 1 - Availability of phosphorus
taxonIdCalais040	Potassium availability	33	mg/dm3	2008-10-21T09:26Z	Extrator Mehlich 1	PlotCalais02_/_Potassium availability - mg/dm3 - Extrator Mehlich 1 - Potassium availability
taxonIdCalais040	Calcium availability	0.33	cmolc/dm3	2008-10-21T09:26Z	Extractor KCl 1mol/L	PlotCalais02_/_Calcium availability - cmolc/dm3 - Extractor KCl 1mol/L - Calcium availability
taxonIdCalais040	Magnesium availability	0.12	cmolc/dm3	2008-10-21T09:26Z	Extractor KCl 1mol/L	PlotCalais02_/_Magnesium availability - cmolc/dm3 - Extractor KCl 1mol/L - Magnesium availability
taxonIdCalais040	Aluminium avalaibility	1.18	cmolc/dm3	2008-10-21T09:26Z	Extractor KCl 1mol/L	PlotCalais02_/_Aluminium avalaibility - cmolc/dm3 - Extractor KCl 1mol/L - Aluminium avalaibility
taxonIdCalais040	Potential Acidity (H+AL)	4.9	cmolc/dm3	2008-10-21T09:26Z	Extractor Ca(CH3COO)2, 0.5mol/L, pH 7.0	PlotCalais02_/_Potential acidity (H+Al) - cmolc/dm3 - Extractor Ca(CH3COO)2, 0.5mol/L, pH 7.0 - Potential acidity (H+Al)
taxonIdCalais040	Interchangeable Bases	0.53	cmolc/dm3	2008-10-21T09:26Z	Interchangeable bases	PlotCalais02_/_Interchangeable bases - cmolc/dm3 - Interchangeable bases - Sum of Interchangeable bases
taxonIdCalais040	Effective cation exchange capacity	1.71	cmolc/dm3	2008-10-21T09:26Z	Effective cation exchange capacity	PlotCalais02_/_Effective cation exchange capacity - cmolc/dm3 - Effective cation exchange capacity - Effective cation exchange capacity
taxonIdCalais040	Cation exchange capacity at pH 7.0	5.43	cmolc/dm3	2008-10-21T09:26Z	Cation exchange capacity at pH 7.0	PlotCalais02_/_Cation exchange capacity at pH 7.0 - cmolc/dm3 - Cation exchange capacity at pH 7.0 - Cation exchange capacity at pH 7.0
taxonIdCalais040	Saturation of bases	9.8	Percentage	2008-10-21T09:26Z	Saturation of bases	PlotCalais02_/_Saturation of bases - Percentage - Saturation of bases - Saturation of bases
taxonIdCalais040	Saturation of aluminium	69	Percentage	2008-10-21T09:26Z	Saturation of aluminium	PlotCalais02_/_Saturation of aluminium - Percentage - Saturation of aluminium - Saturation of aluminium
taxonIdCalais040	Remaining phosphorus	38	mg/L	2008-10-21T09:26Z	Extraction with 0.01 mol/L CaCl2	PlotCalais02_/_Remaining phosphorus - mg/L - Remaining phosphorus - Remaining phosphorus
taxonIdCalais040	Rocky outcrops	5	Percentage	2008-10-21T09:26Z	Estimation	PlotCalais02_/_Rocky outcrops - Percentage - Estimation - Rocky outcrops
taxonIdCalais040	Inclination	5	Percentage	2008-10-21T09:26Z	Estimation	PlotCalais02_/_Inclination - Percentage - Estimation - Inclination
taxonIdCalais042	Coarse sand content	33	Percentage	2008-10-21T09:26Z	sieving	PlotCalais02_/_Coarse sand content - Percentage - sieving - Coarse sand content
taxonIdCalais042	Fine sand content	37	Percentage	2008-10-21T09:26Z	sieving	PlotCalais02_/_Fine sand content - Percentage - sieving - Fine sand content
taxonIdCalais042	Silt content	18	Percentage	2008-10-21T09:26Z	sieving	PlotCalais02_/_Silt content - Percentage - sieving - Silt content
taxonIdCalais042	Clay content	12	Percentage	2008-10-21T09:26Z	sieving	PlotCalais02_/_Clay content - Percentage - sieving - Clay content
taxonIdCalais042	Soil acidity (pH)	5.05	nondimensional	2008-10-21T09:26Z	pH in water	PlotCalais02_/_Soil acidity (pH) - nondimensional - pH in water - Soil acidity (pH)
taxonIdCalais042	Availability of phosphorus	1.7	mg/dm3	2008-10-21T09:26Z	Extrator Mehlich 1	PlotCalais02_/_Availability of phosphorus - mg/dm3 - Extrator Mehlich 1 - Availability of phosphorus
taxonIdCalais042	Potassium availability	33	mg/dm3	2008-10-21T09:26Z	Extrator Mehlich 1	PlotCalais02_/_Potassium availability - mg/dm3 - Extrator Mehlich 1 - Potassium availability
taxonIdCalais042	Calcium availability	0.33	cmolc/dm3	2008-10-21T09:26Z	Extractor KCl 1mol/L	PlotCalais02_/_Calcium availability - cmolc/dm3 - Extractor KCl 1mol/L - Calcium availability
taxonIdCalais042	Magnesium availability	0.12	cmolc/dm3	2008-10-21T09:26Z	Extractor KCl 1mol/L	PlotCalais02_/_Magnesium availability - cmolc/dm3 - Extractor KCl 1mol/L - Magnesium availability
taxonIdCalais042	Aluminium avalaibility	1.18	cmolc/dm3	2008-10-21T09:26Z	Extractor KCl 1mol/L	PlotCalais02_/_Aluminium avalaibility - cmolc/dm3 - Extractor KCl 1mol/L - Aluminium avalaibility
taxonIdCalais042	Potential Acidity (H+AL)	4.9	cmolc/dm3	2008-10-21T09:26Z	Extractor Ca(CH3COO)2, 0.5mol/L, pH 7.0	PlotCalais02_/_Potential acidity (H+Al) - cmolc/dm3 - Extractor Ca(CH3COO)2, 0.5mol/L, pH 7.0 - Potential acidity (H+Al)
taxonIdCalais042	Interchangeable Bases	0.53	cmolc/dm3	2008-10-21T09:26Z	Interchangeable bases	PlotCalais02_/_Interchangeable bases - cmolc/dm3 - Interchangeable bases - Sum of Interchangeable bases
taxonIdCalais042	Effective cation exchange capacity	1.71	cmolc/dm3	2008-10-21T09:26Z	Effective cation exchange capacity	PlotCalais02_/_Effective cation exchange capacity - cmolc/dm3 - Effective cation exchange capacity - Effective cation exchange capacity
taxonIdCalais042	Cation exchange capacity at pH 7.0	5.43	cmolc/dm3	2008-10-21T09:26Z	Cation exchange capacity at pH 7.0	PlotCalais02_/_Cation exchange capacity at pH 7.0 - cmolc/dm3 - Cation exchange capacity at pH 7.0 - Cation exchange capacity at pH 7.0
taxonIdCalais042	Saturation of bases	9.8	Percentage	2008-10-21T09:26Z	Saturation of bases	PlotCalais02_/_Saturation of bases - Percentage - Saturation of bases - Saturation of bases
taxonIdCalais042	Saturation of aluminium	69	Percentage	2008-10-21T09:26Z	Saturation of aluminium	PlotCalais02_/_Saturation of aluminium - Percentage - Saturation of aluminium - Saturation of aluminium
taxonIdCalais042	Remaining phosphorus	38	mg/L	2008-10-21T09:26Z	Extraction with 0.01 mol/L CaCl2	PlotCalais02_/_Remaining phosphorus - mg/L - Remaining phosphorus - Remaining phosphorus
taxonIdCalais042	Rocky outcrops	5	Percentage	2008-10-21T09:26Z	Estimation	PlotCalais02_/_Rocky outcrops - Percentage - Estimation - Rocky outcrops
taxonIdCalais042	Inclination	5	Percentage	2008-10-21T09:26Z	Estimation	PlotCalais02_/_Inclination - Percentage - Estimation - Inclination
taxonIdCalais044	Coarse sand content	33	Percentage	2008-10-21T09:26Z	sieving	PlotCalais02_/_Coarse sand content - Percentage - sieving - Coarse sand content
taxonIdCalais044	Fine sand content	37	Percentage	2008-10-21T09:26Z	sieving	PlotCalais02_/_Fine sand content - Percentage - sieving - Fine sand content
taxonIdCalais044	Silt content	18	Percentage	2008-10-21T09:26Z	sieving	PlotCalais02_/_Silt content - Percentage - sieving - Silt content
taxonIdCalais044	Clay content	12	Percentage	2008-10-21T09:26Z	sieving	PlotCalais02_/_Clay content - Percentage - sieving - Clay content
taxonIdCalais044	Soil acidity (pH)	5.05	nondimensional	2008-10-21T09:26Z	pH in water	PlotCalais02_/_Soil acidity (pH) - nondimensional - pH in water - Soil acidity (pH)
taxonIdCalais044	Availability of phosphorus	1.7	mg/dm3	2008-10-21T09:26Z	Extrator Mehlich 1	PlotCalais02_/_Availability of phosphorus - mg/dm3 - Extrator Mehlich 1 - Availability of phosphorus
taxonIdCalais044	Potassium availability	33	mg/dm3	2008-10-21T09:26Z	Extrator Mehlich 1	PlotCalais02_/_Potassium availability - mg/dm3 - Extrator Mehlich 1 - Potassium availability
taxonIdCalais044	Calcium availability	0.33	cmolc/dm3	2008-10-21T09:26Z	Extractor KCl 1mol/L	PlotCalais02_/_Calcium availability - cmolc/dm3 - Extractor KCl 1mol/L - Calcium availability
taxonIdCalais044	Magnesium availability	0.12	cmolc/dm3	2008-10-21T09:26Z	Extractor KCl 1mol/L	PlotCalais02_/_Magnesium availability - cmolc/dm3 - Extractor KCl 1mol/L - Magnesium availability
taxonIdCalais044	Aluminium avalaibility	1.18	cmolc/dm3	2008-10-21T09:26Z	Extractor KCl 1mol/L	PlotCalais02_/_Aluminium avalaibility - cmolc/dm3 - Extractor KCl 1mol/L - Aluminium avalaibility
taxonIdCalais044	Potential Acidity (H+AL)	4.9	cmolc/dm3	2008-10-21T09:26Z	Extractor Ca(CH3COO)2, 0.5mol/L, pH 7.0	PlotCalais02_/_Potential acidity (H+Al) - cmolc/dm3 - Extractor Ca(CH3COO)2, 0.5mol/L, pH 7.0 - Potential acidity (H+Al)
taxonIdCalais044	Interchangeable Bases	0.53	cmolc/dm3	2008-10-21T09:26Z	Interchangeable bases	PlotCalais02_/_Interchangeable bases - cmolc/dm3 - Interchangeable bases - Sum of Interchangeable bases
taxonIdCalais044	Effective cation exchange capacity	1.71	cmolc/dm3	2008-10-21T09:26Z	Effective cation exchange capacity	PlotCalais02_/_Effective cation exchange capacity - cmolc/dm3 - Effective cation exchange capacity - Effective cation exchange capacity
taxonIdCalais044	Cation exchange capacity at pH 7.0	5.43	cmolc/dm3	2008-10-21T09:26Z	Cation exchange capacity at pH 7.0	PlotCalais02_/_Cation exchange capacity at pH 7.0 - cmolc/dm3 - Cation exchange capacity at pH 7.0 - Cation exchange capacity at pH 7.0
taxonIdCalais044	Saturation of bases	9.8	Percentage	2008-10-21T09:26Z	Saturation of bases	PlotCalais02_/_Saturation of bases - Percentage - Saturation of bases - Saturation of bases
taxonIdCalais044	Saturation of aluminium	69	Percentage	2008-10-21T09:26Z	Saturation of aluminium	PlotCalais02_/_Saturation of aluminium - Percentage - Saturation of aluminium - Saturation of aluminium
taxonIdCalais044	Remaining phosphorus	38	mg/L	2008-10-21T09:26Z	Extraction with 0.01 mol/L CaCl2	PlotCalais02_/_Remaining phosphorus - mg/L - Remaining phosphorus - Remaining phosphorus
taxonIdCalais044	Rocky outcrops	5	Percentage	2008-10-21T09:26Z	Estimation	PlotCalais02_/_Rocky outcrops - Percentage - Estimation - Rocky outcrops
taxonIdCalais044	Inclination	5	Percentage	2008-10-21T09:26Z	Estimation	PlotCalais02_/_Inclination - Percentage - Estimation - Inclination
taxonIdCalais045	Coarse sand content	33	Percentage	2008-10-21T09:26Z	sieving	PlotCalais02_/_Coarse sand content - Percentage - sieving - Coarse sand content
taxonIdCalais045	Fine sand content	37	Percentage	2008-10-21T09:26Z	sieving	PlotCalais02_/_Fine sand content - Percentage - sieving - Fine sand content
taxonIdCalais045	Silt content	18	Percentage	2008-10-21T09:26Z	sieving	PlotCalais02_/_Silt content - Percentage - sieving - Silt content
taxonIdCalais045	Clay content	12	Percentage	2008-10-21T09:26Z	sieving	PlotCalais02_/_Clay content - Percentage - sieving - Clay content
taxonIdCalais045	Soil acidity (pH)	5.05	nondimensional	2008-10-21T09:26Z	pH in water	PlotCalais02_/_Soil acidity (pH) - nondimensional - pH in water - Soil acidity (pH)
taxonIdCalais045	Availability of phosphorus	1.7	mg/dm3	2008-10-21T09:26Z	Extrator Mehlich 1	PlotCalais02_/_Availability of phosphorus - mg/dm3 - Extrator Mehlich 1 - Availability of phosphorus
taxonIdCalais045	Potassium availability	33	mg/dm3	2008-10-21T09:26Z	Extrator Mehlich 1	PlotCalais02_/_Potassium availability - mg/dm3 - Extrator Mehlich 1 - Potassium availability
taxonIdCalais045	Calcium availability	0.33	cmolc/dm3	2008-10-21T09:26Z	Extractor KCl 1mol/L	PlotCalais02_/_Calcium availability - cmolc/dm3 - Extractor KCl 1mol/L - Calcium availability
taxonIdCalais045	Magnesium availability	0.12	cmolc/dm3	2008-10-21T09:26Z	Extractor KCl 1mol/L	PlotCalais02_/_Magnesium availability - cmolc/dm3 - Extractor KCl 1mol/L - Magnesium availability
taxonIdCalais045	Aluminium avalaibility	1.18	cmolc/dm3	2008-10-21T09:26Z	Extractor KCl 1mol/L	PlotCalais02_/_Aluminium avalaibility - cmolc/dm3 - Extractor KCl 1mol/L - Aluminium avalaibility
taxonIdCalais045	Potential Acidity (H+AL)	4.9	cmolc/dm3	2008-10-21T09:26Z	Extractor Ca(CH3COO)2, 0.5mol/L, pH 7.0	PlotCalais02_/_Potential acidity (H+Al) - cmolc/dm3 - Extractor Ca(CH3COO)2, 0.5mol/L, pH 7.0 - Potential acidity (H+Al)
taxonIdCalais045	Interchangeable Bases	0.53	cmolc/dm3	2008-10-21T09:26Z	Interchangeable bases	PlotCalais02_/_Interchangeable bases - cmolc/dm3 - Interchangeable bases - Sum of Interchangeable bases
taxonIdCalais045	Effective cation exchange capacity	1.71	cmolc/dm3	2008-10-21T09:26Z	Effective cation exchange capacity	PlotCalais02_/_Effective cation exchange capacity - cmolc/dm3 - Effective cation exchange capacity - Effective cation exchange capacity
taxonIdCalais045	Cation exchange capacity at pH 7.0	5.43	cmolc/dm3	2008-10-21T09:26Z	Cation exchange capacity at pH 7.0	PlotCalais02_/_Cation exchange capacity at pH 7.0 - cmolc/dm3 - Cation exchange capacity at pH 7.0 - Cation exchange capacity at pH 7.0
taxonIdCalais045	Saturation of bases	9.8	Percentage	2008-10-21T09:26Z	Saturation of bases	PlotCalais02_/_Saturation of bases - Percentage - Saturation of bases - Saturation of bases
taxonIdCalais045	Saturation of aluminium	69	Percentage	2008-10-21T09:26Z	Saturation of aluminium	PlotCalais02_/_Saturation of aluminium - Percentage - Saturation of aluminium - Saturation of aluminium
taxonIdCalais045	Remaining phosphorus	38	mg/L	2008-10-21T09:26Z	Extraction with 0.01 mol/L CaCl2	PlotCalais02_/_Remaining phosphorus - mg/L - Remaining phosphorus - Remaining phosphorus
taxonIdCalais045	Rocky outcrops	5	Percentage	2008-10-21T09:26Z	Estimation	PlotCalais02_/_Rocky outcrops - Percentage - Estimation - Rocky outcrops
taxonIdCalais045	Inclination	5	Percentage	2008-10-21T09:26Z	Estimation	PlotCalais02_/_Inclination - Percentage - Estimation - Inclination
taxonIdCalais051	Coarse sand content	33	Percentage	2008-10-21T09:26Z	sieving	PlotCalais02_/_Coarse sand content - Percentage - sieving - Coarse sand content
taxonIdCalais051	Fine sand content	37	Percentage	2008-10-21T09:26Z	sieving	PlotCalais02_/_Fine sand content - Percentage - sieving - Fine sand content
taxonIdCalais051	Silt content	18	Percentage	2008-10-21T09:26Z	sieving	PlotCalais02_/_Silt content - Percentage - sieving - Silt content
taxonIdCalais051	Clay content	12	Percentage	2008-10-21T09:26Z	sieving	PlotCalais02_/_Clay content - Percentage - sieving - Clay content
taxonIdCalais051	Soil acidity (pH)	5.05	nondimensional	2008-10-21T09:26Z	pH in water	PlotCalais02_/_Soil acidity (pH) - nondimensional - pH in water - Soil acidity (pH)
taxonIdCalais051	Availability of phosphorus	1.7	mg/dm3	2008-10-21T09:26Z	Extrator Mehlich 1	PlotCalais02_/_Availability of phosphorus - mg/dm3 - Extrator Mehlich 1 - Availability of phosphorus
taxonIdCalais051	Potassium availability	33	mg/dm3	2008-10-21T09:26Z	Extrator Mehlich 1	PlotCalais02_/_Potassium availability - mg/dm3 - Extrator Mehlich 1 - Potassium availability
taxonIdCalais051	Calcium availability	0.33	cmolc/dm3	2008-10-21T09:26Z	Extractor KCl 1mol/L	PlotCalais02_/_Calcium availability - cmolc/dm3 - Extractor KCl 1mol/L - Calcium availability
taxonIdCalais051	Magnesium availability	0.12	cmolc/dm3	2008-10-21T09:26Z	Extractor KCl 1mol/L	PlotCalais02_/_Magnesium availability - cmolc/dm3 - Extractor KCl 1mol/L - Magnesium availability
taxonIdCalais051	Aluminium avalaibility	1.18	cmolc/dm3	2008-10-21T09:26Z	Extractor KCl 1mol/L	PlotCalais02_/_Aluminium avalaibility - cmolc/dm3 - Extractor KCl 1mol/L - Aluminium avalaibility
taxonIdCalais051	Potential Acidity (H+AL)	4.9	cmolc/dm3	2008-10-21T09:26Z	Extractor Ca(CH3COO)2, 0.5mol/L, pH 7.0	PlotCalais02_/_Potential acidity (H+Al) - cmolc/dm3 - Extractor Ca(CH3COO)2, 0.5mol/L, pH 7.0 - Potential acidity (H+Al)
taxonIdCalais051	Interchangeable Bases	0.53	cmolc/dm3	2008-10-21T09:26Z	Interchangeable bases	PlotCalais02_/_Interchangeable bases - cmolc/dm3 - Interchangeable bases - Sum of Interchangeable bases
taxonIdCalais051	Effective cation exchange capacity	1.71	cmolc/dm3	2008-10-21T09:26Z	Effective cation exchange capacity	PlotCalais02_/_Effective cation exchange capacity - cmolc/dm3 - Effective cation exchange capacity - Effective cation exchange capacity
taxonIdCalais051	Cation exchange capacity at pH 7.0	5.43	cmolc/dm3	2008-10-21T09:26Z	Cation exchange capacity at pH 7.0	PlotCalais02_/_Cation exchange capacity at pH 7.0 - cmolc/dm3 - Cation exchange capacity at pH 7.0 - Cation exchange capacity at pH 7.0
taxonIdCalais051	Saturation of bases	9.8	Percentage	2008-10-21T09:26Z	Saturation of bases	PlotCalais02_/_Saturation of bases - Percentage - Saturation of bases - Saturation of bases
taxonIdCalais051	Saturation of aluminium	69	Percentage	2008-10-21T09:26Z	Saturation of aluminium	PlotCalais02_/_Saturation of aluminium - Percentage - Saturation of aluminium - Saturation of aluminium
taxonIdCalais051	Remaining phosphorus	38	mg/L	2008-10-21T09:26Z	Extraction with 0.01 mol/L CaCl2	PlotCalais02_/_Remaining phosphorus - mg/L - Remaining phosphorus - Remaining phosphorus
taxonIdCalais051	Rocky outcrops	5	Percentage	2008-10-21T09:26Z	Estimation	PlotCalais02_/_Rocky outcrops - Percentage - Estimation - Rocky outcrops
taxonIdCalais051	Inclination	5	Percentage	2008-10-21T09:26Z	Estimation	PlotCalais02_/_Inclination - Percentage - Estimation - Inclination
taxonIdCalais052	Coarse sand content	33	Percentage	2008-10-21T09:26Z	sieving	PlotCalais02_/_Coarse sand content - Percentage - sieving - Coarse sand content
taxonIdCalais052	Fine sand content	37	Percentage	2008-10-21T09:26Z	sieving	PlotCalais02_/_Fine sand content - Percentage - sieving - Fine sand content
taxonIdCalais052	Silt content	18	Percentage	2008-10-21T09:26Z	sieving	PlotCalais02_/_Silt content - Percentage - sieving - Silt content
taxonIdCalais052	Clay content	12	Percentage	2008-10-21T09:26Z	sieving	PlotCalais02_/_Clay content - Percentage - sieving - Clay content
taxonIdCalais052	Soil acidity (pH)	5.05	nondimensional	2008-10-21T09:26Z	pH in water	PlotCalais02_/_Soil acidity (pH) - nondimensional - pH in water - Soil acidity (pH)
taxonIdCalais052	Availability of phosphorus	1.7	mg/dm3	2008-10-21T09:26Z	Extrator Mehlich 1	PlotCalais02_/_Availability of phosphorus - mg/dm3 - Extrator Mehlich 1 - Availability of phosphorus
taxonIdCalais052	Potassium availability	33	mg/dm3	2008-10-21T09:26Z	Extrator Mehlich 1	PlotCalais02_/_Potassium availability - mg/dm3 - Extrator Mehlich 1 - Potassium availability
taxonIdCalais052	Calcium availability	0.33	cmolc/dm3	2008-10-21T09:26Z	Extractor KCl 1mol/L	PlotCalais02_/_Calcium availability - cmolc/dm3 - Extractor KCl 1mol/L - Calcium availability
taxonIdCalais052	Magnesium availability	0.12	cmolc/dm3	2008-10-21T09:26Z	Extractor KCl 1mol/L	PlotCalais02_/_Magnesium availability - cmolc/dm3 - Extractor KCl 1mol/L - Magnesium availability
taxonIdCalais052	Aluminium avalaibility	1.18	cmolc/dm3	2008-10-21T09:26Z	Extractor KCl 1mol/L	PlotCalais02_/_Aluminium avalaibility - cmolc/dm3 - Extractor KCl 1mol/L - Aluminium avalaibility
taxonIdCalais052	Potential Acidity (H+AL)	4.9	cmolc/dm3	2008-10-21T09:26Z	Extractor Ca(CH3COO)2, 0.5mol/L, pH 7.0	PlotCalais02_/_Potential acidity (H+Al) - cmolc/dm3 - Extractor Ca(CH3COO)2, 0.5mol/L, pH 7.0 - Potential acidity (H+Al)
taxonIdCalais052	Interchangeable Bases	0.53	cmolc/dm3	2008-10-21T09:26Z	Interchangeable bases	PlotCalais02_/_Interchangeable bases - cmolc/dm3 - Interchangeable bases - Sum of Interchangeable bases
taxonIdCalais052	Effective cation exchange capacity	1.71	cmolc/dm3	2008-10-21T09:26Z	Effective cation exchange capacity	PlotCalais02_/_Effective cation exchange capacity - cmolc/dm3 - Effective cation exchange capacity - Effective cation exchange capacity
taxonIdCalais052	Cation exchange capacity at pH 7.0	5.43	cmolc/dm3	2008-10-21T09:26Z	Cation exchange capacity at pH 7.0	PlotCalais02_/_Cation exchange capacity at pH 7.0 - cmolc/dm3 - Cation exchange capacity at pH 7.0 - Cation exchange capacity at pH 7.0
taxonIdCalais052	Saturation of bases	9.8	Percentage	2008-10-21T09:26Z	Saturation of bases	PlotCalais02_/_Saturation of bases - Percentage - Saturation of bases - Saturation of bases
taxonIdCalais052	Saturation of aluminium	69	Percentage	2008-10-21T09:26Z	Saturation of aluminium	PlotCalais02_/_Saturation of aluminium - Percentage - Saturation of aluminium - Saturation of aluminium
taxonIdCalais052	Remaining phosphorus	38	mg/L	2008-10-21T09:26Z	Extraction with 0.01 mol/L CaCl2	PlotCalais02_/_Remaining phosphorus - mg/L - Remaining phosphorus - Remaining phosphorus
taxonIdCalais052	Rocky outcrops	5	Percentage	2008-10-21T09:26Z	Estimation	PlotCalais02_/_Rocky outcrops - Percentage - Estimation - Rocky outcrops
taxonIdCalais052	Inclination	5	Percentage	2008-10-21T09:26Z	Estimation	PlotCalais02_/_Inclination - Percentage - Estimation - Inclination
taxonIdCalais062	Coarse sand content	33	Percentage	2008-10-21T09:26Z	sieving	PlotCalais02_/_Coarse sand content - Percentage - sieving - Coarse sand content
taxonIdCalais062	Fine sand content	37	Percentage	2008-10-21T09:26Z	sieving	PlotCalais02_/_Fine sand content - Percentage - sieving - Fine sand content
taxonIdCalais062	Silt content	18	Percentage	2008-10-21T09:26Z	sieving	PlotCalais02_/_Silt content - Percentage - sieving - Silt content
taxonIdCalais062	Clay content	12	Percentage	2008-10-21T09:26Z	sieving	PlotCalais02_/_Clay content - Percentage - sieving - Clay content
taxonIdCalais062	Soil acidity (pH)	5.05	nondimensional	2008-10-21T09:26Z	pH in water	PlotCalais02_/_Soil acidity (pH) - nondimensional - pH in water - Soil acidity (pH)
taxonIdCalais062	Availability of phosphorus	1.7	mg/dm3	2008-10-21T09:26Z	Extrator Mehlich 1	PlotCalais02_/_Availability of phosphorus - mg/dm3 - Extrator Mehlich 1 - Availability of phosphorus
taxonIdCalais062	Potassium availability	33	mg/dm3	2008-10-21T09:26Z	Extrator Mehlich 1	PlotCalais02_/_Potassium availability - mg/dm3 - Extrator Mehlich 1 - Potassium availability
taxonIdCalais062	Calcium availability	0.33	cmolc/dm3	2008-10-21T09:26Z	Extractor KCl 1mol/L	PlotCalais02_/_Calcium availability - cmolc/dm3 - Extractor KCl 1mol/L - Calcium availability
taxonIdCalais062	Magnesium availability	0.12	cmolc/dm3	2008-10-21T09:26Z	Extractor KCl 1mol/L	PlotCalais02_/_Magnesium availability - cmolc/dm3 - Extractor KCl 1mol/L - Magnesium availability
taxonIdCalais062	Aluminium avalaibility	1.18	cmolc/dm3	2008-10-21T09:26Z	Extractor KCl 1mol/L	PlotCalais02_/_Aluminium avalaibility - cmolc/dm3 - Extractor KCl 1mol/L - Aluminium avalaibility
taxonIdCalais062	Potential Acidity (H+AL)	4.9	cmolc/dm3	2008-10-21T09:26Z	Extractor Ca(CH3COO)2, 0.5mol/L, pH 7.0	PlotCalais02_/_Potential acidity (H+Al) - cmolc/dm3 - Extractor Ca(CH3COO)2, 0.5mol/L, pH 7.0 - Potential acidity (H+Al)
taxonIdCalais062	Interchangeable Bases	0.53	cmolc/dm3	2008-10-21T09:26Z	Interchangeable bases	PlotCalais02_/_Interchangeable bases - cmolc/dm3 - Interchangeable bases - Sum of Interchangeable bases
taxonIdCalais062	Effective cation exchange capacity	1.71	cmolc/dm3	2008-10-21T09:26Z	Effective cation exchange capacity	PlotCalais02_/_Effective cation exchange capacity - cmolc/dm3 - Effective cation exchange capacity - Effective cation exchange capacity
taxonIdCalais062	Cation exchange capacity at pH 7.0	5.43	cmolc/dm3	2008-10-21T09:26Z	Cation exchange capacity at pH 7.0	PlotCalais02_/_Cation exchange capacity at pH 7.0 - cmolc/dm3 - Cation exchange capacity at pH 7.0 - Cation exchange capacity at pH 7.0
taxonIdCalais062	Saturation of bases	9.8	Percentage	2008-10-21T09:26Z	Saturation of bases	PlotCalais02_/_Saturation of bases - Percentage - Saturation of bases - Saturation of bases
taxonIdCalais062	Saturation of aluminium	69	Percentage	2008-10-21T09:26Z	Saturation of aluminium	PlotCalais02_/_Saturation of aluminium - Percentage - Saturation of aluminium - Saturation of aluminium
taxonIdCalais062	Remaining phosphorus	38	mg/L	2008-10-21T09:26Z	Extraction with 0.01 mol/L CaCl2	PlotCalais02_/_Remaining phosphorus - mg/L - Remaining phosphorus - Remaining phosphorus
taxonIdCalais062	Rocky outcrops	5	Percentage	2008-10-21T09:26Z	Estimation	PlotCalais02_/_Rocky outcrops - Percentage - Estimation - Rocky outcrops
taxonIdCalais062	Inclination	5	Percentage	2008-10-21T09:26Z	Estimation	PlotCalais02_/_Inclination - Percentage - Estimation - Inclination
taxonIdCalais063	Coarse sand content	33	Percentage	2008-10-21T09:26Z	sieving	PlotCalais02_/_Coarse sand content - Percentage - sieving - Coarse sand content
taxonIdCalais063	Fine sand content	37	Percentage	2008-10-21T09:26Z	sieving	PlotCalais02_/_Fine sand content - Percentage - sieving - Fine sand content
taxonIdCalais063	Silt content	18	Percentage	2008-10-21T09:26Z	sieving	PlotCalais02_/_Silt content - Percentage - sieving - Silt content
taxonIdCalais063	Clay content	12	Percentage	2008-10-21T09:26Z	sieving	PlotCalais02_/_Clay content - Percentage - sieving - Clay content
taxonIdCalais063	Soil acidity (pH)	5.05	nondimensional	2008-10-21T09:26Z	pH in water	PlotCalais02_/_Soil acidity (pH) - nondimensional - pH in water - Soil acidity (pH)
taxonIdCalais063	Availability of phosphorus	1.7	mg/dm3	2008-10-21T09:26Z	Extrator Mehlich 1	PlotCalais02_/_Availability of phosphorus - mg/dm3 - Extrator Mehlich 1 - Availability of phosphorus
taxonIdCalais063	Potassium availability	33	mg/dm3	2008-10-21T09:26Z	Extrator Mehlich 1	PlotCalais02_/_Potassium availability - mg/dm3 - Extrator Mehlich 1 - Potassium availability
taxonIdCalais063	Calcium availability	0.33	cmolc/dm3	2008-10-21T09:26Z	Extractor KCl 1mol/L	PlotCalais02_/_Calcium availability - cmolc/dm3 - Extractor KCl 1mol/L - Calcium availability
taxonIdCalais063	Magnesium availability	0.12	cmolc/dm3	2008-10-21T09:26Z	Extractor KCl 1mol/L	PlotCalais02_/_Magnesium availability - cmolc/dm3 - Extractor KCl 1mol/L - Magnesium availability
taxonIdCalais063	Aluminium avalaibility	1.18	cmolc/dm3	2008-10-21T09:26Z	Extractor KCl 1mol/L	PlotCalais02_/_Aluminium avalaibility - cmolc/dm3 - Extractor KCl 1mol/L - Aluminium avalaibility
taxonIdCalais063	Potential Acidity (H+AL)	4.9	cmolc/dm3	2008-10-21T09:26Z	Extractor Ca(CH3COO)2, 0.5mol/L, pH 7.0	PlotCalais02_/_Potential acidity (H+Al) - cmolc/dm3 - Extractor Ca(CH3COO)2, 0.5mol/L, pH 7.0 - Potential acidity (H+Al)
taxonIdCalais063	Interchangeable Bases	0.53	cmolc/dm3	2008-10-21T09:26Z	Interchangeable bases	PlotCalais02_/_Interchangeable bases - cmolc/dm3 - Interchangeable bases - Sum of Interchangeable bases
taxonIdCalais063	Effective cation exchange capacity	1.71	cmolc/dm3	2008-10-21T09:26Z	Effective cation exchange capacity	PlotCalais02_/_Effective cation exchange capacity - cmolc/dm3 - Effective cation exchange capacity - Effective cation exchange capacity
taxonIdCalais063	Cation exchange capacity at pH 7.0	5.43	cmolc/dm3	2008-10-21T09:26Z	Cation exchange capacity at pH 7.0	PlotCalais02_/_Cation exchange capacity at pH 7.0 - cmolc/dm3 - Cation exchange capacity at pH 7.0 - Cation exchange capacity at pH 7.0
taxonIdCalais063	Saturation of bases	9.8	Percentage	2008-10-21T09:26Z	Saturation of bases	PlotCalais02_/_Saturation of bases - Percentage - Saturation of bases - Saturation of bases
taxonIdCalais063	Saturation of aluminium	69	Percentage	2008-10-21T09:26Z	Saturation of aluminium	PlotCalais02_/_Saturation of aluminium - Percentage - Saturation of aluminium - Saturation of aluminium
taxonIdCalais063	Remaining phosphorus	38	mg/L	2008-10-21T09:26Z	Extraction with 0.01 mol/L CaCl2	PlotCalais02_/_Remaining phosphorus - mg/L - Remaining phosphorus - Remaining phosphorus
taxonIdCalais063	Rocky outcrops	5	Percentage	2008-10-21T09:26Z	Estimation	PlotCalais02_/_Rocky outcrops - Percentage - Estimation - Rocky outcrops
taxonIdCalais063	Inclination	5	Percentage	2008-10-21T09:26Z	Estimation	PlotCalais02_/_Inclination - Percentage - Estimation - Inclination
taxonIdCalais066	Coarse sand content	33	Percentage	2008-10-21T09:26Z	sieving	PlotCalais02_/_Coarse sand content - Percentage - sieving - Coarse sand content
taxonIdCalais066	Fine sand content	37	Percentage	2008-10-21T09:26Z	sieving	PlotCalais02_/_Fine sand content - Percentage - sieving - Fine sand content
taxonIdCalais066	Silt content	18	Percentage	2008-10-21T09:26Z	sieving	PlotCalais02_/_Silt content - Percentage - sieving - Silt content
taxonIdCalais066	Clay content	12	Percentage	2008-10-21T09:26Z	sieving	PlotCalais02_/_Clay content - Percentage - sieving - Clay content
taxonIdCalais066	Soil acidity (pH)	5.05	nondimensional	2008-10-21T09:26Z	pH in water	PlotCalais02_/_Soil acidity (pH) - nondimensional - pH in water - Soil acidity (pH)
taxonIdCalais066	Availability of phosphorus	1.7	mg/dm3	2008-10-21T09:26Z	Extrator Mehlich 1	PlotCalais02_/_Availability of phosphorus - mg/dm3 - Extrator Mehlich 1 - Availability of phosphorus
taxonIdCalais066	Potassium availability	33	mg/dm3	2008-10-21T09:26Z	Extrator Mehlich 1	PlotCalais02_/_Potassium availability - mg/dm3 - Extrator Mehlich 1 - Potassium availability
taxonIdCalais066	Calcium availability	0.33	cmolc/dm3	2008-10-21T09:26Z	Extractor KCl 1mol/L	PlotCalais02_/_Calcium availability - cmolc/dm3 - Extractor KCl 1mol/L - Calcium availability
taxonIdCalais066	Magnesium availability	0.12	cmolc/dm3	2008-10-21T09:26Z	Extractor KCl 1mol/L	PlotCalais02_/_Magnesium availability - cmolc/dm3 - Extractor KCl 1mol/L - Magnesium availability
taxonIdCalais066	Aluminium avalaibility	1.18	cmolc/dm3	2008-10-21T09:26Z	Extractor KCl 1mol/L	PlotCalais02_/_Aluminium avalaibility - cmolc/dm3 - Extractor KCl 1mol/L - Aluminium avalaibility
taxonIdCalais066	Potential Acidity (H+AL)	4.9	cmolc/dm3	2008-10-21T09:26Z	Extractor Ca(CH3COO)2, 0.5mol/L, pH 7.0	PlotCalais02_/_Potential acidity (H+Al) - cmolc/dm3 - Extractor Ca(CH3COO)2, 0.5mol/L, pH 7.0 - Potential acidity (H+Al)
taxonIdCalais066	Interchangeable Bases	0.53	cmolc/dm3	2008-10-21T09:26Z	Interchangeable bases	PlotCalais02_/_Interchangeable bases - cmolc/dm3 - Interchangeable bases - Sum of Interchangeable bases
taxonIdCalais066	Effective cation exchange capacity	1.71	cmolc/dm3	2008-10-21T09:26Z	Effective cation exchange capacity	PlotCalais02_/_Effective cation exchange capacity - cmolc/dm3 - Effective cation exchange capacity - Effective cation exchange capacity
taxonIdCalais066	Cation exchange capacity at pH 7.0	5.43	cmolc/dm3	2008-10-21T09:26Z	Cation exchange capacity at pH 7.0	PlotCalais02_/_Cation exchange capacity at pH 7.0 - cmolc/dm3 - Cation exchange capacity at pH 7.0 - Cation exchange capacity at pH 7.0
taxonIdCalais066	Saturation of bases	9.8	Percentage	2008-10-21T09:26Z	Saturation of bases	PlotCalais02_/_Saturation of bases - Percentage - Saturation of bases - Saturation of bases
taxonIdCalais066	Saturation of aluminium	69	Percentage	2008-10-21T09:26Z	Saturation of aluminium	PlotCalais02_/_Saturation of aluminium - Percentage - Saturation of aluminium - Saturation of aluminium
taxonIdCalais066	Remaining phosphorus	38	mg/L	2008-10-21T09:26Z	Extraction with 0.01 mol/L CaCl2	PlotCalais02_/_Remaining phosphorus - mg/L - Remaining phosphorus - Remaining phosphorus
taxonIdCalais066	Rocky outcrops	5	Percentage	2008-10-21T09:26Z	Estimation	PlotCalais02_/_Rocky outcrops - Percentage - Estimation - Rocky outcrops
taxonIdCalais066	Inclination	5	Percentage	2008-10-21T09:26Z	Estimation	PlotCalais02_/_Inclination - Percentage - Estimation - Inclination
taxonIdCalais067	Coarse sand content	33	Percentage	2008-10-21T09:26Z	sieving	PlotCalais02_/_Coarse sand content - Percentage - sieving - Coarse sand content
taxonIdCalais067	Fine sand content	37	Percentage	2008-10-21T09:26Z	sieving	PlotCalais02_/_Fine sand content - Percentage - sieving - Fine sand content
taxonIdCalais067	Silt content	18	Percentage	2008-10-21T09:26Z	sieving	PlotCalais02_/_Silt content - Percentage - sieving - Silt content
taxonIdCalais067	Clay content	12	Percentage	2008-10-21T09:26Z	sieving	PlotCalais02_/_Clay content - Percentage - sieving - Clay content
taxonIdCalais067	Soil acidity (pH)	5.05	nondimensional	2008-10-21T09:26Z	pH in water	PlotCalais02_/_Soil acidity (pH) - nondimensional - pH in water - Soil acidity (pH)
taxonIdCalais067	Availability of phosphorus	1.7	mg/dm3	2008-10-21T09:26Z	Extrator Mehlich 1	PlotCalais02_/_Availability of phosphorus - mg/dm3 - Extrator Mehlich 1 - Availability of phosphorus
taxonIdCalais067	Potassium availability	33	mg/dm3	2008-10-21T09:26Z	Extrator Mehlich 1	PlotCalais02_/_Potassium availability - mg/dm3 - Extrator Mehlich 1 - Potassium availability
taxonIdCalais067	Calcium availability	0.33	cmolc/dm3	2008-10-21T09:26Z	Extractor KCl 1mol/L	PlotCalais02_/_Calcium availability - cmolc/dm3 - Extractor KCl 1mol/L - Calcium availability
taxonIdCalais067	Magnesium availability	0.12	cmolc/dm3	2008-10-21T09:26Z	Extractor KCl 1mol/L	PlotCalais02_/_Magnesium availability - cmolc/dm3 - Extractor KCl 1mol/L - Magnesium availability
taxonIdCalais067	Aluminium avalaibility	1.18	cmolc/dm3	2008-10-21T09:26Z	Extractor KCl 1mol/L	PlotCalais02_/_Aluminium avalaibility - cmolc/dm3 - Extractor KCl 1mol/L - Aluminium avalaibility
taxonIdCalais067	Potential Acidity (H+AL)	4.9	cmolc/dm3	2008-10-21T09:26Z	Extractor Ca(CH3COO)2, 0.5mol/L, pH 7.0	PlotCalais02_/_Potential acidity (H+Al) - cmolc/dm3 - Extractor Ca(CH3COO)2, 0.5mol/L, pH 7.0 - Potential acidity (H+Al)
taxonIdCalais067	Interchangeable Bases	0.53	cmolc/dm3	2008-10-21T09:26Z	Interchangeable bases	PlotCalais02_/_Interchangeable bases - cmolc/dm3 - Interchangeable bases - Sum of Interchangeable bases
taxonIdCalais067	Effective cation exchange capacity	1.71	cmolc/dm3	2008-10-21T09:26Z	Effective cation exchange capacity	PlotCalais02_/_Effective cation exchange capacity - cmolc/dm3 - Effective cation exchange capacity - Effective cation exchange capacity
taxonIdCalais067	Cation exchange capacity at pH 7.0	5.43	cmolc/dm3	2008-10-21T09:26Z	Cation exchange capacity at pH 7.0	PlotCalais02_/_Cation exchange capacity at pH 7.0 - cmolc/dm3 - Cation exchange capacity at pH 7.0 - Cation exchange capacity at pH 7.0
taxonIdCalais067	Saturation of bases	9.8	Percentage	2008-10-21T09:26Z	Saturation of bases	PlotCalais02_/_Saturation of bases - Percentage - Saturation of bases - Saturation of bases
taxonIdCalais067	Saturation of aluminium	69	Percentage	2008-10-21T09:26Z	Saturation of aluminium	PlotCalais02_/_Saturation of aluminium - Percentage - Saturation of aluminium - Saturation of aluminium
taxonIdCalais067	Remaining phosphorus	38	mg/L	2008-10-21T09:26Z	Extraction with 0.01 mol/L CaCl2	PlotCalais02_/_Remaining phosphorus - mg/L - Remaining phosphorus - Remaining phosphorus
taxonIdCalais067	Rocky outcrops	5	Percentage	2008-10-21T09:26Z	Estimation	PlotCalais02_/_Rocky outcrops - Percentage - Estimation - Rocky outcrops
taxonIdCalais067	Inclination	5	Percentage	2008-10-21T09:26Z	Estimation	PlotCalais02_/_Inclination - Percentage - Estimation - Inclination
taxonIdCalais068	Coarse sand content	33	Percentage	2008-10-21T09:26Z	sieving	PlotCalais02_/_Coarse sand content - Percentage - sieving - Coarse sand content
taxonIdCalais068	Fine sand content	37	Percentage	2008-10-21T09:26Z	sieving	PlotCalais02_/_Fine sand content - Percentage - sieving - Fine sand content
taxonIdCalais068	Silt content	18	Percentage	2008-10-21T09:26Z	sieving	PlotCalais02_/_Silt content - Percentage - sieving - Silt content
taxonIdCalais068	Clay content	12	Percentage	2008-10-21T09:26Z	sieving	PlotCalais02_/_Clay content - Percentage - sieving - Clay content
taxonIdCalais068	Soil acidity (pH)	5.05	nondimensional	2008-10-21T09:26Z	pH in water	PlotCalais02_/_Soil acidity (pH) - nondimensional - pH in water - Soil acidity (pH)
taxonIdCalais068	Availability of phosphorus	1.7	mg/dm3	2008-10-21T09:26Z	Extrator Mehlich 1	PlotCalais02_/_Availability of phosphorus - mg/dm3 - Extrator Mehlich 1 - Availability of phosphorus
taxonIdCalais068	Potassium availability	33	mg/dm3	2008-10-21T09:26Z	Extrator Mehlich 1	PlotCalais02_/_Potassium availability - mg/dm3 - Extrator Mehlich 1 - Potassium availability
taxonIdCalais068	Calcium availability	0.33	cmolc/dm3	2008-10-21T09:26Z	Extractor KCl 1mol/L	PlotCalais02_/_Calcium availability - cmolc/dm3 - Extractor KCl 1mol/L - Calcium availability
taxonIdCalais068	Magnesium availability	0.12	cmolc/dm3	2008-10-21T09:26Z	Extractor KCl 1mol/L	PlotCalais02_/_Magnesium availability - cmolc/dm3 - Extractor KCl 1mol/L - Magnesium availability
taxonIdCalais068	Aluminium avalaibility	1.18	cmolc/dm3	2008-10-21T09:26Z	Extractor KCl 1mol/L	PlotCalais02_/_Aluminium avalaibility - cmolc/dm3 - Extractor KCl 1mol/L - Aluminium avalaibility
taxonIdCalais068	Potential Acidity (H+AL)	4.9	cmolc/dm3	2008-10-21T09:26Z	Extractor Ca(CH3COO)2, 0.5mol/L, pH 7.0	PlotCalais02_/_Potential acidity (H+Al) - cmolc/dm3 - Extractor Ca(CH3COO)2, 0.5mol/L, pH 7.0 - Potential acidity (H+Al)
taxonIdCalais068	Interchangeable Bases	0.53	cmolc/dm3	2008-10-21T09:26Z	Interchangeable bases	PlotCalais02_/_Interchangeable bases - cmolc/dm3 - Interchangeable bases - Sum of Interchangeable bases
taxonIdCalais068	Effective cation exchange capacity	1.71	cmolc/dm3	2008-10-21T09:26Z	Effective cation exchange capacity	PlotCalais02_/_Effective cation exchange capacity - cmolc/dm3 - Effective cation exchange capacity - Effective cation exchange capacity
taxonIdCalais068	Cation exchange capacity at pH 7.0	5.43	cmolc/dm3	2008-10-21T09:26Z	Cation exchange capacity at pH 7.0	PlotCalais02_/_Cation exchange capacity at pH 7.0 - cmolc/dm3 - Cation exchange capacity at pH 7.0 - Cation exchange capacity at pH 7.0
taxonIdCalais068	Saturation of bases	9.8	Percentage	2008-10-21T09:26Z	Saturation of bases	PlotCalais02_/_Saturation of bases - Percentage - Saturation of bases - Saturation of bases
taxonIdCalais068	Saturation of aluminium	69	Percentage	2008-10-21T09:26Z	Saturation of aluminium	PlotCalais02_/_Saturation of aluminium - Percentage - Saturation of aluminium - Saturation of aluminium
taxonIdCalais068	Remaining phosphorus	38	mg/L	2008-10-21T09:26Z	Extraction with 0.01 mol/L CaCl2	PlotCalais02_/_Remaining phosphorus - mg/L - Remaining phosphorus - Remaining phosphorus
taxonIdCalais068	Rocky outcrops	5	Percentage	2008-10-21T09:26Z	Estimation	PlotCalais02_/_Rocky outcrops - Percentage - Estimation - Rocky outcrops
taxonIdCalais068	Inclination	5	Percentage	2008-10-21T09:26Z	Estimation	PlotCalais02_/_Inclination - Percentage - Estimation - Inclination
taxonIdCalais069	Coarse sand content	33	Percentage	2008-10-21T09:26Z	sieving	PlotCalais02_/_Coarse sand content - Percentage - sieving - Coarse sand content
taxonIdCalais069	Fine sand content	37	Percentage	2008-10-21T09:26Z	sieving	PlotCalais02_/_Fine sand content - Percentage - sieving - Fine sand content
taxonIdCalais069	Silt content	18	Percentage	2008-10-21T09:26Z	sieving	PlotCalais02_/_Silt content - Percentage - sieving - Silt content
taxonIdCalais069	Clay content	12	Percentage	2008-10-21T09:26Z	sieving	PlotCalais02_/_Clay content - Percentage - sieving - Clay content
taxonIdCalais069	Soil acidity (pH)	5.05	nondimensional	2008-10-21T09:26Z	pH in water	PlotCalais02_/_Soil acidity (pH) - nondimensional - pH in water - Soil acidity (pH)
taxonIdCalais069	Availability of phosphorus	1.7	mg/dm3	2008-10-21T09:26Z	Extrator Mehlich 1	PlotCalais02_/_Availability of phosphorus - mg/dm3 - Extrator Mehlich 1 - Availability of phosphorus
taxonIdCalais069	Potassium availability	33	mg/dm3	2008-10-21T09:26Z	Extrator Mehlich 1	PlotCalais02_/_Potassium availability - mg/dm3 - Extrator Mehlich 1 - Potassium availability
taxonIdCalais069	Calcium availability	0.33	cmolc/dm3	2008-10-21T09:26Z	Extractor KCl 1mol/L	PlotCalais02_/_Calcium availability - cmolc/dm3 - Extractor KCl 1mol/L - Calcium availability
taxonIdCalais069	Magnesium availability	0.12	cmolc/dm3	2008-10-21T09:26Z	Extractor KCl 1mol/L	PlotCalais02_/_Magnesium availability - cmolc/dm3 - Extractor KCl 1mol/L - Magnesium availability
taxonIdCalais069	Aluminium avalaibility	1.18	cmolc/dm3	2008-10-21T09:26Z	Extractor KCl 1mol/L	PlotCalais02_/_Aluminium avalaibility - cmolc/dm3 - Extractor KCl 1mol/L - Aluminium avalaibility
taxonIdCalais069	Potential Acidity (H+AL)	4.9	cmolc/dm3	2008-10-21T09:26Z	Extractor Ca(CH3COO)2, 0.5mol/L, pH 7.0	PlotCalais02_/_Potential acidity (H+Al) - cmolc/dm3 - Extractor Ca(CH3COO)2, 0.5mol/L, pH 7.0 - Potential acidity (H+Al)
taxonIdCalais069	Interchangeable Bases	0.53	cmolc/dm3	2008-10-21T09:26Z	Interchangeable bases	PlotCalais02_/_Interchangeable bases - cmolc/dm3 - Interchangeable bases - Sum of Interchangeable bases
taxonIdCalais069	Effective cation exchange capacity	1.71	cmolc/dm3	2008-10-21T09:26Z	Effective cation exchange capacity	PlotCalais02_/_Effective cation exchange capacity - cmolc/dm3 - Effective cation exchange capacity - Effective cation exchange capacity
taxonIdCalais069	Cation exchange capacity at pH 7.0	5.43	cmolc/dm3	2008-10-21T09:26Z	Cation exchange capacity at pH 7.0	PlotCalais02_/_Cation exchange capacity at pH 7.0 - cmolc/dm3 - Cation exchange capacity at pH 7.0 - Cation exchange capacity at pH 7.0
taxonIdCalais069	Saturation of bases	9.8	Percentage	2008-10-21T09:26Z	Saturation of bases	PlotCalais02_/_Saturation of bases - Percentage - Saturation of bases - Saturation of bases
taxonIdCalais069	Saturation of aluminium	69	Percentage	2008-10-21T09:26Z	Saturation of aluminium	PlotCalais02_/_Saturation of aluminium - Percentage - Saturation of aluminium - Saturation of aluminium
taxonIdCalais069	Remaining phosphorus	38	mg/L	2008-10-21T09:26Z	Extraction with 0.01 mol/L CaCl2	PlotCalais02_/_Remaining phosphorus - mg/L - Remaining phosphorus - Remaining phosphorus
taxonIdCalais069	Rocky outcrops	5	Percentage	2008-10-21T09:26Z	Estimation	PlotCalais02_/_Rocky outcrops - Percentage - Estimation - Rocky outcrops
taxonIdCalais069	Inclination	5	Percentage	2008-10-21T09:26Z	Estimation	PlotCalais02_/_Inclination - Percentage - Estimation - Inclination
taxonIdCalais074	Coarse sand content	33	Percentage	2008-10-21T09:26Z	sieving	PlotCalais02_/_Coarse sand content - Percentage - sieving - Coarse sand content
taxonIdCalais074	Fine sand content	37	Percentage	2008-10-21T09:26Z	sieving	PlotCalais02_/_Fine sand content - Percentage - sieving - Fine sand content
taxonIdCalais074	Silt content	18	Percentage	2008-10-21T09:26Z	sieving	PlotCalais02_/_Silt content - Percentage - sieving - Silt content
taxonIdCalais074	Clay content	12	Percentage	2008-10-21T09:26Z	sieving	PlotCalais02_/_Clay content - Percentage - sieving - Clay content
taxonIdCalais074	Soil acidity (pH)	5.05	nondimensional	2008-10-21T09:26Z	pH in water	PlotCalais02_/_Soil acidity (pH) - nondimensional - pH in water - Soil acidity (pH)
taxonIdCalais074	Availability of phosphorus	1.7	mg/dm3	2008-10-21T09:26Z	Extrator Mehlich 1	PlotCalais02_/_Availability of phosphorus - mg/dm3 - Extrator Mehlich 1 - Availability of phosphorus
taxonIdCalais074	Potassium availability	33	mg/dm3	2008-10-21T09:26Z	Extrator Mehlich 1	PlotCalais02_/_Potassium availability - mg/dm3 - Extrator Mehlich 1 - Potassium availability
taxonIdCalais074	Calcium availability	0.33	cmolc/dm3	2008-10-21T09:26Z	Extractor KCl 1mol/L	PlotCalais02_/_Calcium availability - cmolc/dm3 - Extractor KCl 1mol/L - Calcium availability
taxonIdCalais074	Magnesium availability	0.12	cmolc/dm3	2008-10-21T09:26Z	Extractor KCl 1mol/L	PlotCalais02_/_Magnesium availability - cmolc/dm3 - Extractor KCl 1mol/L - Magnesium availability
taxonIdCalais074	Aluminium avalaibility	1.18	cmolc/dm3	2008-10-21T09:26Z	Extractor KCl 1mol/L	PlotCalais02_/_Aluminium avalaibility - cmolc/dm3 - Extractor KCl 1mol/L - Aluminium avalaibility
taxonIdCalais074	Potential Acidity (H+AL)	4.9	cmolc/dm3	2008-10-21T09:26Z	Extractor Ca(CH3COO)2, 0.5mol/L, pH 7.0	PlotCalais02_/_Potential acidity (H+Al) - cmolc/dm3 - Extractor Ca(CH3COO)2, 0.5mol/L, pH 7.0 - Potential acidity (H+Al)
taxonIdCalais074	Interchangeable Bases	0.53	cmolc/dm3	2008-10-21T09:26Z	Interchangeable bases	PlotCalais02_/_Interchangeable bases - cmolc/dm3 - Interchangeable bases - Sum of Interchangeable bases
taxonIdCalais074	Effective cation exchange capacity	1.71	cmolc/dm3	2008-10-21T09:26Z	Effective cation exchange capacity	PlotCalais02_/_Effective cation exchange capacity - cmolc/dm3 - Effective cation exchange capacity - Effective cation exchange capacity
taxonIdCalais074	Cation exchange capacity at pH 7.0	5.43	cmolc/dm3	2008-10-21T09:26Z	Cation exchange capacity at pH 7.0	PlotCalais02_/_Cation exchange capacity at pH 7.0 - cmolc/dm3 - Cation exchange capacity at pH 7.0 - Cation exchange capacity at pH 7.0
taxonIdCalais074	Saturation of bases	9.8	Percentage	2008-10-21T09:26Z	Saturation of bases	PlotCalais02_/_Saturation of bases - Percentage - Saturation of bases - Saturation of bases
taxonIdCalais074	Saturation of aluminium	69	Percentage	2008-10-21T09:26Z	Saturation of aluminium	PlotCalais02_/_Saturation of aluminium - Percentage - Saturation of aluminium - Saturation of aluminium
taxonIdCalais074	Remaining phosphorus	38	mg/L	2008-10-21T09:26Z	Extraction with 0.01 mol/L CaCl2	PlotCalais02_/_Remaining phosphorus - mg/L - Remaining phosphorus - Remaining phosphorus
taxonIdCalais074	Rocky outcrops	5	Percentage	2008-10-21T09:26Z	Estimation	PlotCalais02_/_Rocky outcrops - Percentage - Estimation - Rocky outcrops
taxonIdCalais074	Inclination	5	Percentage	2008-10-21T09:26Z	Estimation	PlotCalais02_/_Inclination - Percentage - Estimation - Inclination
taxonIdCalais076	Coarse sand content	33	Percentage	2008-10-21T09:26Z	sieving	PlotCalais02_/_Coarse sand content - Percentage - sieving - Coarse sand content
taxonIdCalais076	Fine sand content	37	Percentage	2008-10-21T09:26Z	sieving	PlotCalais02_/_Fine sand content - Percentage - sieving - Fine sand content
taxonIdCalais076	Silt content	18	Percentage	2008-10-21T09:26Z	sieving	PlotCalais02_/_Silt content - Percentage - sieving - Silt content
taxonIdCalais076	Clay content	12	Percentage	2008-10-21T09:26Z	sieving	PlotCalais02_/_Clay content - Percentage - sieving - Clay content
taxonIdCalais076	Soil acidity (pH)	5.05	nondimensional	2008-10-21T09:26Z	pH in water	PlotCalais02_/_Soil acidity (pH) - nondimensional - pH in water - Soil acidity (pH)
taxonIdCalais076	Availability of phosphorus	1.7	mg/dm3	2008-10-21T09:26Z	Extrator Mehlich 1	PlotCalais02_/_Availability of phosphorus - mg/dm3 - Extrator Mehlich 1 - Availability of phosphorus
taxonIdCalais076	Potassium availability	33	mg/dm3	2008-10-21T09:26Z	Extrator Mehlich 1	PlotCalais02_/_Potassium availability - mg/dm3 - Extrator Mehlich 1 - Potassium availability
taxonIdCalais076	Calcium availability	0.33	cmolc/dm3	2008-10-21T09:26Z	Extractor KCl 1mol/L	PlotCalais02_/_Calcium availability - cmolc/dm3 - Extractor KCl 1mol/L - Calcium availability
taxonIdCalais076	Magnesium availability	0.12	cmolc/dm3	2008-10-21T09:26Z	Extractor KCl 1mol/L	PlotCalais02_/_Magnesium availability - cmolc/dm3 - Extractor KCl 1mol/L - Magnesium availability
taxonIdCalais076	Aluminium avalaibility	1.18	cmolc/dm3	2008-10-21T09:26Z	Extractor KCl 1mol/L	PlotCalais02_/_Aluminium avalaibility - cmolc/dm3 - Extractor KCl 1mol/L - Aluminium avalaibility
taxonIdCalais076	Potential Acidity (H+AL)	4.9	cmolc/dm3	2008-10-21T09:26Z	Extractor Ca(CH3COO)2, 0.5mol/L, pH 7.0	PlotCalais02_/_Potential acidity (H+Al) - cmolc/dm3 - Extractor Ca(CH3COO)2, 0.5mol/L, pH 7.0 - Potential acidity (H+Al)
taxonIdCalais076	Interchangeable Bases	0.53	cmolc/dm3	2008-10-21T09:26Z	Interchangeable bases	PlotCalais02_/_Interchangeable bases - cmolc/dm3 - Interchangeable bases - Sum of Interchangeable bases
taxonIdCalais076	Effective cation exchange capacity	1.71	cmolc/dm3	2008-10-21T09:26Z	Effective cation exchange capacity	PlotCalais02_/_Effective cation exchange capacity - cmolc/dm3 - Effective cation exchange capacity - Effective cation exchange capacity
taxonIdCalais076	Cation exchange capacity at pH 7.0	5.43	cmolc/dm3	2008-10-21T09:26Z	Cation exchange capacity at pH 7.0	PlotCalais02_/_Cation exchange capacity at pH 7.0 - cmolc/dm3 - Cation exchange capacity at pH 7.0 - Cation exchange capacity at pH 7.0
taxonIdCalais076	Saturation of bases	9.8	Percentage	2008-10-21T09:26Z	Saturation of bases	PlotCalais02_/_Saturation of bases - Percentage - Saturation of bases - Saturation of bases
taxonIdCalais076	Saturation of aluminium	69	Percentage	2008-10-21T09:26Z	Saturation of aluminium	PlotCalais02_/_Saturation of aluminium - Percentage - Saturation of aluminium - Saturation of aluminium
taxonIdCalais076	Remaining phosphorus	38	mg/L	2008-10-21T09:26Z	Extraction with 0.01 mol/L CaCl2	PlotCalais02_/_Remaining phosphorus - mg/L - Remaining phosphorus - Remaining phosphorus
taxonIdCalais076	Rocky outcrops	5	Percentage	2008-10-21T09:26Z	Estimation	PlotCalais02_/_Rocky outcrops - Percentage - Estimation - Rocky outcrops
taxonIdCalais076	Inclination	5	Percentage	2008-10-21T09:26Z	Estimation	PlotCalais02_/_Inclination - Percentage - Estimation - Inclination
taxonIdCalais078	Coarse sand content	33	Percentage	2008-10-21T09:26Z	sieving	PlotCalais02_/_Coarse sand content - Percentage - sieving - Coarse sand content
taxonIdCalais078	Fine sand content	37	Percentage	2008-10-21T09:26Z	sieving	PlotCalais02_/_Fine sand content - Percentage - sieving - Fine sand content
taxonIdCalais078	Silt content	18	Percentage	2008-10-21T09:26Z	sieving	PlotCalais02_/_Silt content - Percentage - sieving - Silt content
taxonIdCalais078	Clay content	12	Percentage	2008-10-21T09:26Z	sieving	PlotCalais02_/_Clay content - Percentage - sieving - Clay content
taxonIdCalais078	Soil acidity (pH)	5.05	nondimensional	2008-10-21T09:26Z	pH in water	PlotCalais02_/_Soil acidity (pH) - nondimensional - pH in water - Soil acidity (pH)
taxonIdCalais078	Availability of phosphorus	1.7	mg/dm3	2008-10-21T09:26Z	Extrator Mehlich 1	PlotCalais02_/_Availability of phosphorus - mg/dm3 - Extrator Mehlich 1 - Availability of phosphorus
taxonIdCalais078	Potassium availability	33	mg/dm3	2008-10-21T09:26Z	Extrator Mehlich 1	PlotCalais02_/_Potassium availability - mg/dm3 - Extrator Mehlich 1 - Potassium availability
taxonIdCalais078	Calcium availability	0.33	cmolc/dm3	2008-10-21T09:26Z	Extractor KCl 1mol/L	PlotCalais02_/_Calcium availability - cmolc/dm3 - Extractor KCl 1mol/L - Calcium availability
taxonIdCalais078	Magnesium availability	0.12	cmolc/dm3	2008-10-21T09:26Z	Extractor KCl 1mol/L	PlotCalais02_/_Magnesium availability - cmolc/dm3 - Extractor KCl 1mol/L - Magnesium availability
taxonIdCalais078	Aluminium avalaibility	1.18	cmolc/dm3	2008-10-21T09:26Z	Extractor KCl 1mol/L	PlotCalais02_/_Aluminium avalaibility - cmolc/dm3 - Extractor KCl 1mol/L - Aluminium avalaibility
taxonIdCalais078	Potential Acidity (H+AL)	4.9	cmolc/dm3	2008-10-21T09:26Z	Extractor Ca(CH3COO)2, 0.5mol/L, pH 7.0	PlotCalais02_/_Potential acidity (H+Al) - cmolc/dm3 - Extractor Ca(CH3COO)2, 0.5mol/L, pH 7.0 - Potential acidity (H+Al)
taxonIdCalais078	Interchangeable Bases	0.53	cmolc/dm3	2008-10-21T09:26Z	Interchangeable bases	PlotCalais02_/_Interchangeable bases - cmolc/dm3 - Interchangeable bases - Sum of Interchangeable bases
taxonIdCalais078	Effective cation exchange capacity	1.71	cmolc/dm3	2008-10-21T09:26Z	Effective cation exchange capacity	PlotCalais02_/_Effective cation exchange capacity - cmolc/dm3 - Effective cation exchange capacity - Effective cation exchange capacity
taxonIdCalais078	Cation exchange capacity at pH 7.0	5.43	cmolc/dm3	2008-10-21T09:26Z	Cation exchange capacity at pH 7.0	PlotCalais02_/_Cation exchange capacity at pH 7.0 - cmolc/dm3 - Cation exchange capacity at pH 7.0 - Cation exchange capacity at pH 7.0
taxonIdCalais078	Saturation of bases	9.8	Percentage	2008-10-21T09:26Z	Saturation of bases	PlotCalais02_/_Saturation of bases - Percentage - Saturation of bases - Saturation of bases
taxonIdCalais078	Saturation of aluminium	69	Percentage	2008-10-21T09:26Z	Saturation of aluminium	PlotCalais02_/_Saturation of aluminium - Percentage - Saturation of aluminium - Saturation of aluminium
taxonIdCalais078	Remaining phosphorus	38	mg/L	2008-10-21T09:26Z	Extraction with 0.01 mol/L CaCl2	PlotCalais02_/_Remaining phosphorus - mg/L - Remaining phosphorus - Remaining phosphorus
taxonIdCalais078	Rocky outcrops	5	Percentage	2008-10-21T09:26Z	Estimation	PlotCalais02_/_Rocky outcrops - Percentage - Estimation - Rocky outcrops
taxonIdCalais078	Inclination	5	Percentage	2008-10-21T09:26Z	Estimation	PlotCalais02_/_Inclination - Percentage - Estimation - Inclination
taxonIdCalais081	Coarse sand content	33	Percentage	2008-10-21T09:26Z	sieving	PlotCalais02_/_Coarse sand content - Percentage - sieving - Coarse sand content
taxonIdCalais081	Fine sand content	37	Percentage	2008-10-21T09:26Z	sieving	PlotCalais02_/_Fine sand content - Percentage - sieving - Fine sand content
taxonIdCalais081	Silt content	18	Percentage	2008-10-21T09:26Z	sieving	PlotCalais02_/_Silt content - Percentage - sieving - Silt content
taxonIdCalais081	Clay content	12	Percentage	2008-10-21T09:26Z	sieving	PlotCalais02_/_Clay content - Percentage - sieving - Clay content
taxonIdCalais081	Soil acidity (pH)	5.05	nondimensional	2008-10-21T09:26Z	pH in water	PlotCalais02_/_Soil acidity (pH) - nondimensional - pH in water - Soil acidity (pH)
taxonIdCalais081	Availability of phosphorus	1.7	mg/dm3	2008-10-21T09:26Z	Extrator Mehlich 1	PlotCalais02_/_Availability of phosphorus - mg/dm3 - Extrator Mehlich 1 - Availability of phosphorus
taxonIdCalais081	Potassium availability	33	mg/dm3	2008-10-21T09:26Z	Extrator Mehlich 1	PlotCalais02_/_Potassium availability - mg/dm3 - Extrator Mehlich 1 - Potassium availability
taxonIdCalais081	Calcium availability	0.33	cmolc/dm3	2008-10-21T09:26Z	Extractor KCl 1mol/L	PlotCalais02_/_Calcium availability - cmolc/dm3 - Extractor KCl 1mol/L - Calcium availability
taxonIdCalais081	Magnesium availability	0.12	cmolc/dm3	2008-10-21T09:26Z	Extractor KCl 1mol/L	PlotCalais02_/_Magnesium availability - cmolc/dm3 - Extractor KCl 1mol/L - Magnesium availability
taxonIdCalais081	Aluminium avalaibility	1.18	cmolc/dm3	2008-10-21T09:26Z	Extractor KCl 1mol/L	PlotCalais02_/_Aluminium avalaibility - cmolc/dm3 - Extractor KCl 1mol/L - Aluminium avalaibility
taxonIdCalais081	Potential Acidity (H+AL)	4.9	cmolc/dm3	2008-10-21T09:26Z	Extractor Ca(CH3COO)2, 0.5mol/L, pH 7.0	PlotCalais02_/_Potential acidity (H+Al) - cmolc/dm3 - Extractor Ca(CH3COO)2, 0.5mol/L, pH 7.0 - Potential acidity (H+Al)
taxonIdCalais081	Interchangeable Bases	0.53	cmolc/dm3	2008-10-21T09:26Z	Interchangeable bases	PlotCalais02_/_Interchangeable bases - cmolc/dm3 - Interchangeable bases - Sum of Interchangeable bases
taxonIdCalais081	Effective cation exchange capacity	1.71	cmolc/dm3	2008-10-21T09:26Z	Effective cation exchange capacity	PlotCalais02_/_Effective cation exchange capacity - cmolc/dm3 - Effective cation exchange capacity - Effective cation exchange capacity
taxonIdCalais081	Cation exchange capacity at pH 7.0	5.43	cmolc/dm3	2008-10-21T09:26Z	Cation exchange capacity at pH 7.0	PlotCalais02_/_Cation exchange capacity at pH 7.0 - cmolc/dm3 - Cation exchange capacity at pH 7.0 - Cation exchange capacity at pH 7.0
taxonIdCalais081	Saturation of bases	9.8	Percentage	2008-10-21T09:26Z	Saturation of bases	PlotCalais02_/_Saturation of bases - Percentage - Saturation of bases - Saturation of bases
taxonIdCalais081	Saturation of aluminium	69	Percentage	2008-10-21T09:26Z	Saturation of aluminium	PlotCalais02_/_Saturation of aluminium - Percentage - Saturation of aluminium - Saturation of aluminium
taxonIdCalais081	Remaining phosphorus	38	mg/L	2008-10-21T09:26Z	Extraction with 0.01 mol/L CaCl2	PlotCalais02_/_Remaining phosphorus - mg/L - Remaining phosphorus - Remaining phosphorus
taxonIdCalais081	Rocky outcrops	5	Percentage	2008-10-21T09:26Z	Estimation	PlotCalais02_/_Rocky outcrops - Percentage - Estimation - Rocky outcrops
taxonIdCalais081	Inclination	5	Percentage	2008-10-21T09:26Z	Estimation	PlotCalais02_/_Inclination - Percentage - Estimation - Inclination
taxonIdCalais083	Coarse sand content	33	Percentage	2008-10-21T09:26Z	sieving	PlotCalais02_/_Coarse sand content - Percentage - sieving - Coarse sand content
taxonIdCalais083	Fine sand content	37	Percentage	2008-10-21T09:26Z	sieving	PlotCalais02_/_Fine sand content - Percentage - sieving - Fine sand content
taxonIdCalais083	Silt content	18	Percentage	2008-10-21T09:26Z	sieving	PlotCalais02_/_Silt content - Percentage - sieving - Silt content
taxonIdCalais083	Clay content	12	Percentage	2008-10-21T09:26Z	sieving	PlotCalais02_/_Clay content - Percentage - sieving - Clay content
taxonIdCalais083	Soil acidity (pH)	5.05	nondimensional	2008-10-21T09:26Z	pH in water	PlotCalais02_/_Soil acidity (pH) - nondimensional - pH in water - Soil acidity (pH)
taxonIdCalais083	Availability of phosphorus	1.7	mg/dm3	2008-10-21T09:26Z	Extrator Mehlich 1	PlotCalais02_/_Availability of phosphorus - mg/dm3 - Extrator Mehlich 1 - Availability of phosphorus
taxonIdCalais083	Potassium availability	33	mg/dm3	2008-10-21T09:26Z	Extrator Mehlich 1	PlotCalais02_/_Potassium availability - mg/dm3 - Extrator Mehlich 1 - Potassium availability
taxonIdCalais083	Calcium availability	0.33	cmolc/dm3	2008-10-21T09:26Z	Extractor KCl 1mol/L	PlotCalais02_/_Calcium availability - cmolc/dm3 - Extractor KCl 1mol/L - Calcium availability
taxonIdCalais083	Magnesium availability	0.12	cmolc/dm3	2008-10-21T09:26Z	Extractor KCl 1mol/L	PlotCalais02_/_Magnesium availability - cmolc/dm3 - Extractor KCl 1mol/L - Magnesium availability
taxonIdCalais083	Aluminium avalaibility	1.18	cmolc/dm3	2008-10-21T09:26Z	Extractor KCl 1mol/L	PlotCalais02_/_Aluminium avalaibility - cmolc/dm3 - Extractor KCl 1mol/L - Aluminium avalaibility
taxonIdCalais083	Potential Acidity (H+AL)	4.9	cmolc/dm3	2008-10-21T09:26Z	Extractor Ca(CH3COO)2, 0.5mol/L, pH 7.0	PlotCalais02_/_Potential acidity (H+Al) - cmolc/dm3 - Extractor Ca(CH3COO)2, 0.5mol/L, pH 7.0 - Potential acidity (H+Al)
taxonIdCalais083	Interchangeable Bases	0.53	cmolc/dm3	2008-10-21T09:26Z	Interchangeable bases	PlotCalais02_/_Interchangeable bases - cmolc/dm3 - Interchangeable bases - Sum of Interchangeable bases
taxonIdCalais083	Effective cation exchange capacity	1.71	cmolc/dm3	2008-10-21T09:26Z	Effective cation exchange capacity	PlotCalais02_/_Effective cation exchange capacity - cmolc/dm3 - Effective cation exchange capacity - Effective cation exchange capacity
taxonIdCalais083	Cation exchange capacity at pH 7.0	5.43	cmolc/dm3	2008-10-21T09:26Z	Cation exchange capacity at pH 7.0	PlotCalais02_/_Cation exchange capacity at pH 7.0 - cmolc/dm3 - Cation exchange capacity at pH 7.0 - Cation exchange capacity at pH 7.0
taxonIdCalais083	Saturation of bases	9.8	Percentage	2008-10-21T09:26Z	Saturation of bases	PlotCalais02_/_Saturation of bases - Percentage - Saturation of bases - Saturation of bases
taxonIdCalais083	Saturation of aluminium	69	Percentage	2008-10-21T09:26Z	Saturation of aluminium	PlotCalais02_/_Saturation of aluminium - Percentage - Saturation of aluminium - Saturation of aluminium
taxonIdCalais083	Remaining phosphorus	38	mg/L	2008-10-21T09:26Z	Extraction with 0.01 mol/L CaCl2	PlotCalais02_/_Remaining phosphorus - mg/L - Remaining phosphorus - Remaining phosphorus
taxonIdCalais083	Rocky outcrops	5	Percentage	2008-10-21T09:26Z	Estimation	PlotCalais02_/_Rocky outcrops - Percentage - Estimation - Rocky outcrops
taxonIdCalais083	Inclination	5	Percentage	2008-10-21T09:26Z	Estimation	PlotCalais02_/_Inclination - Percentage - Estimation - Inclination
taxonIdCalais084	Coarse sand content	33	Percentage	2008-10-21T09:26Z	sieving	PlotCalais02_/_Coarse sand content - Percentage - sieving - Coarse sand content
taxonIdCalais084	Fine sand content	37	Percentage	2008-10-21T09:26Z	sieving	PlotCalais02_/_Fine sand content - Percentage - sieving - Fine sand content
taxonIdCalais084	Silt content	18	Percentage	2008-10-21T09:26Z	sieving	PlotCalais02_/_Silt content - Percentage - sieving - Silt content
taxonIdCalais084	Clay content	12	Percentage	2008-10-21T09:26Z	sieving	PlotCalais02_/_Clay content - Percentage - sieving - Clay content
taxonIdCalais084	Soil acidity (pH)	5.05	nondimensional	2008-10-21T09:26Z	pH in water	PlotCalais02_/_Soil acidity (pH) - nondimensional - pH in water - Soil acidity (pH)
taxonIdCalais084	Availability of phosphorus	1.7	mg/dm3	2008-10-21T09:26Z	Extrator Mehlich 1	PlotCalais02_/_Availability of phosphorus - mg/dm3 - Extrator Mehlich 1 - Availability of phosphorus
taxonIdCalais084	Potassium availability	33	mg/dm3	2008-10-21T09:26Z	Extrator Mehlich 1	PlotCalais02_/_Potassium availability - mg/dm3 - Extrator Mehlich 1 - Potassium availability
taxonIdCalais084	Calcium availability	0.33	cmolc/dm3	2008-10-21T09:26Z	Extractor KCl 1mol/L	PlotCalais02_/_Calcium availability - cmolc/dm3 - Extractor KCl 1mol/L - Calcium availability
taxonIdCalais084	Magnesium availability	0.12	cmolc/dm3	2008-10-21T09:26Z	Extractor KCl 1mol/L	PlotCalais02_/_Magnesium availability - cmolc/dm3 - Extractor KCl 1mol/L - Magnesium availability
taxonIdCalais084	Aluminium avalaibility	1.18	cmolc/dm3	2008-10-21T09:26Z	Extractor KCl 1mol/L	PlotCalais02_/_Aluminium avalaibility - cmolc/dm3 - Extractor KCl 1mol/L - Aluminium avalaibility
taxonIdCalais084	Potential Acidity (H+AL)	4.9	cmolc/dm3	2008-10-21T09:26Z	Extractor Ca(CH3COO)2, 0.5mol/L, pH 7.0	PlotCalais02_/_Potential acidity (H+Al) - cmolc/dm3 - Extractor Ca(CH3COO)2, 0.5mol/L, pH 7.0 - Potential acidity (H+Al)
taxonIdCalais084	Interchangeable Bases	0.53	cmolc/dm3	2008-10-21T09:26Z	Interchangeable bases	PlotCalais02_/_Interchangeable bases - cmolc/dm3 - Interchangeable bases - Sum of Interchangeable bases
taxonIdCalais084	Effective cation exchange capacity	1.71	cmolc/dm3	2008-10-21T09:26Z	Effective cation exchange capacity	PlotCalais02_/_Effective cation exchange capacity - cmolc/dm3 - Effective cation exchange capacity - Effective cation exchange capacity
taxonIdCalais084	Cation exchange capacity at pH 7.0	5.43	cmolc/dm3	2008-10-21T09:26Z	Cation exchange capacity at pH 7.0	PlotCalais02_/_Cation exchange capacity at pH 7.0 - cmolc/dm3 - Cation exchange capacity at pH 7.0 - Cation exchange capacity at pH 7.0
taxonIdCalais084	Saturation of bases	9.8	Percentage	2008-10-21T09:26Z	Saturation of bases	PlotCalais02_/_Saturation of bases - Percentage - Saturation of bases - Saturation of bases
taxonIdCalais084	Saturation of aluminium	69	Percentage	2008-10-21T09:26Z	Saturation of aluminium	PlotCalais02_/_Saturation of aluminium - Percentage - Saturation of aluminium - Saturation of aluminium
taxonIdCalais084	Remaining phosphorus	38	mg/L	2008-10-21T09:26Z	Extraction with 0.01 mol/L CaCl2	PlotCalais02_/_Remaining phosphorus - mg/L - Remaining phosphorus - Remaining phosphorus
taxonIdCalais084	Rocky outcrops	5	Percentage	2008-10-21T09:26Z	Estimation	PlotCalais02_/_Rocky outcrops - Percentage - Estimation - Rocky outcrops
taxonIdCalais084	Inclination	5	Percentage	2008-10-21T09:26Z	Estimation	PlotCalais02_/_Inclination - Percentage - Estimation - Inclination
taxonIdCalais087	Coarse sand content	33	Percentage	2008-10-21T09:26Z	sieving	PlotCalais02_/_Coarse sand content - Percentage - sieving - Coarse sand content
taxonIdCalais087	Fine sand content	37	Percentage	2008-10-21T09:26Z	sieving	PlotCalais02_/_Fine sand content - Percentage - sieving - Fine sand content
taxonIdCalais087	Silt content	18	Percentage	2008-10-21T09:26Z	sieving	PlotCalais02_/_Silt content - Percentage - sieving - Silt content
taxonIdCalais087	Clay content	12	Percentage	2008-10-21T09:26Z	sieving	PlotCalais02_/_Clay content - Percentage - sieving - Clay content
taxonIdCalais087	Soil acidity (pH)	5.05	nondimensional	2008-10-21T09:26Z	pH in water	PlotCalais02_/_Soil acidity (pH) - nondimensional - pH in water - Soil acidity (pH)
taxonIdCalais087	Availability of phosphorus	1.7	mg/dm3	2008-10-21T09:26Z	Extrator Mehlich 1	PlotCalais02_/_Availability of phosphorus - mg/dm3 - Extrator Mehlich 1 - Availability of phosphorus
taxonIdCalais087	Potassium availability	33	mg/dm3	2008-10-21T09:26Z	Extrator Mehlich 1	PlotCalais02_/_Potassium availability - mg/dm3 - Extrator Mehlich 1 - Potassium availability
taxonIdCalais087	Calcium availability	0.33	cmolc/dm3	2008-10-21T09:26Z	Extractor KCl 1mol/L	PlotCalais02_/_Calcium availability - cmolc/dm3 - Extractor KCl 1mol/L - Calcium availability
taxonIdCalais087	Magnesium availability	0.12	cmolc/dm3	2008-10-21T09:26Z	Extractor KCl 1mol/L	PlotCalais02_/_Magnesium availability - cmolc/dm3 - Extractor KCl 1mol/L - Magnesium availability
taxonIdCalais087	Aluminium avalaibility	1.18	cmolc/dm3	2008-10-21T09:26Z	Extractor KCl 1mol/L	PlotCalais02_/_Aluminium avalaibility - cmolc/dm3 - Extractor KCl 1mol/L - Aluminium avalaibility
taxonIdCalais087	Potential Acidity (H+AL)	4.9	cmolc/dm3	2008-10-21T09:26Z	Extractor Ca(CH3COO)2, 0.5mol/L, pH 7.0	PlotCalais02_/_Potential acidity (H+Al) - cmolc/dm3 - Extractor Ca(CH3COO)2, 0.5mol/L, pH 7.0 - Potential acidity (H+Al)
taxonIdCalais087	Interchangeable Bases	0.53	cmolc/dm3	2008-10-21T09:26Z	Interchangeable bases	PlotCalais02_/_Interchangeable bases - cmolc/dm3 - Interchangeable bases - Sum of Interchangeable bases
taxonIdCalais087	Effective cation exchange capacity	1.71	cmolc/dm3	2008-10-21T09:26Z	Effective cation exchange capacity	PlotCalais02_/_Effective cation exchange capacity - cmolc/dm3 - Effective cation exchange capacity - Effective cation exchange capacity
taxonIdCalais087	Cation exchange capacity at pH 7.0	5.43	cmolc/dm3	2008-10-21T09:26Z	Cation exchange capacity at pH 7.0	PlotCalais02_/_Cation exchange capacity at pH 7.0 - cmolc/dm3 - Cation exchange capacity at pH 7.0 - Cation exchange capacity at pH 7.0
taxonIdCalais087	Saturation of bases	9.8	Percentage	2008-10-21T09:26Z	Saturation of bases	PlotCalais02_/_Saturation of bases - Percentage - Saturation of bases - Saturation of bases
taxonIdCalais087	Saturation of aluminium	69	Percentage	2008-10-21T09:26Z	Saturation of aluminium	PlotCalais02_/_Saturation of aluminium - Percentage - Saturation of aluminium - Saturation of aluminium
taxonIdCalais087	Remaining phosphorus	38	mg/L	2008-10-21T09:26Z	Extraction with 0.01 mol/L CaCl2	PlotCalais02_/_Remaining phosphorus - mg/L - Remaining phosphorus - Remaining phosphorus
taxonIdCalais087	Rocky outcrops	5	Percentage	2008-10-21T09:26Z	Estimation	PlotCalais02_/_Rocky outcrops - Percentage - Estimation - Rocky outcrops
taxonIdCalais087	Inclination	5	Percentage	2008-10-21T09:26Z	Estimation	PlotCalais02_/_Inclination - Percentage - Estimation - Inclination
taxonIdCalais097	Coarse sand content	33	Percentage	2008-10-21T09:26Z	sieving	PlotCalais02_/_Coarse sand content - Percentage - sieving - Coarse sand content
taxonIdCalais097	Fine sand content	37	Percentage	2008-10-21T09:26Z	sieving	PlotCalais02_/_Fine sand content - Percentage - sieving - Fine sand content
taxonIdCalais097	Silt content	18	Percentage	2008-10-21T09:26Z	sieving	PlotCalais02_/_Silt content - Percentage - sieving - Silt content
taxonIdCalais097	Clay content	12	Percentage	2008-10-21T09:26Z	sieving	PlotCalais02_/_Clay content - Percentage - sieving - Clay content
taxonIdCalais097	Soil acidity (pH)	5.05	nondimensional	2008-10-21T09:26Z	pH in water	PlotCalais02_/_Soil acidity (pH) - nondimensional - pH in water - Soil acidity (pH)
taxonIdCalais097	Availability of phosphorus	1.7	mg/dm3	2008-10-21T09:26Z	Extrator Mehlich 1	PlotCalais02_/_Availability of phosphorus - mg/dm3 - Extrator Mehlich 1 - Availability of phosphorus
taxonIdCalais097	Potassium availability	33	mg/dm3	2008-10-21T09:26Z	Extrator Mehlich 1	PlotCalais02_/_Potassium availability - mg/dm3 - Extrator Mehlich 1 - Potassium availability
taxonIdCalais097	Calcium availability	0.33	cmolc/dm3	2008-10-21T09:26Z	Extractor KCl 1mol/L	PlotCalais02_/_Calcium availability - cmolc/dm3 - Extractor KCl 1mol/L - Calcium availability
taxonIdCalais097	Magnesium availability	0.12	cmolc/dm3	2008-10-21T09:26Z	Extractor KCl 1mol/L	PlotCalais02_/_Magnesium availability - cmolc/dm3 - Extractor KCl 1mol/L - Magnesium availability
taxonIdCalais097	Aluminium avalaibility	1.18	cmolc/dm3	2008-10-21T09:26Z	Extractor KCl 1mol/L	PlotCalais02_/_Aluminium avalaibility - cmolc/dm3 - Extractor KCl 1mol/L - Aluminium avalaibility
taxonIdCalais097	Potential Acidity (H+AL)	4.9	cmolc/dm3	2008-10-21T09:26Z	Extractor Ca(CH3COO)2, 0.5mol/L, pH 7.0	PlotCalais02_/_Potential acidity (H+Al) - cmolc/dm3 - Extractor Ca(CH3COO)2, 0.5mol/L, pH 7.0 - Potential acidity (H+Al)
taxonIdCalais097	Interchangeable Bases	0.53	cmolc/dm3	2008-10-21T09:26Z	Interchangeable bases	PlotCalais02_/_Interchangeable bases - cmolc/dm3 - Interchangeable bases - Sum of Interchangeable bases
taxonIdCalais097	Effective cation exchange capacity	1.71	cmolc/dm3	2008-10-21T09:26Z	Effective cation exchange capacity	PlotCalais02_/_Effective cation exchange capacity - cmolc/dm3 - Effective cation exchange capacity - Effective cation exchange capacity
taxonIdCalais097	Cation exchange capacity at pH 7.0	5.43	cmolc/dm3	2008-10-21T09:26Z	Cation exchange capacity at pH 7.0	PlotCalais02_/_Cation exchange capacity at pH 7.0 - cmolc/dm3 - Cation exchange capacity at pH 7.0 - Cation exchange capacity at pH 7.0
taxonIdCalais097	Saturation of bases	9.8	Percentage	2008-10-21T09:26Z	Saturation of bases	PlotCalais02_/_Saturation of bases - Percentage - Saturation of bases - Saturation of bases
taxonIdCalais097	Saturation of aluminium	69	Percentage	2008-10-21T09:26Z	Saturation of aluminium	PlotCalais02_/_Saturation of aluminium - Percentage - Saturation of aluminium - Saturation of aluminium
taxonIdCalais097	Remaining phosphorus	38	mg/L	2008-10-21T09:26Z	Extraction with 0.01 mol/L CaCl2	PlotCalais02_/_Remaining phosphorus - mg/L - Remaining phosphorus - Remaining phosphorus
taxonIdCalais097	Rocky outcrops	5	Percentage	2008-10-21T09:26Z	Estimation	PlotCalais02_/_Rocky outcrops - Percentage - Estimation - Rocky outcrops
taxonIdCalais097	Inclination	5	Percentage	2008-10-21T09:26Z	Estimation	PlotCalais02_/_Inclination - Percentage - Estimation - Inclination
taxonIdCalais101	Coarse sand content	33	Percentage	2008-10-21T09:26Z	sieving	PlotCalais02_/_Coarse sand content - Percentage - sieving - Coarse sand content
taxonIdCalais101	Fine sand content	37	Percentage	2008-10-21T09:26Z	sieving	PlotCalais02_/_Fine sand content - Percentage - sieving - Fine sand content
taxonIdCalais101	Silt content	18	Percentage	2008-10-21T09:26Z	sieving	PlotCalais02_/_Silt content - Percentage - sieving - Silt content
taxonIdCalais101	Clay content	12	Percentage	2008-10-21T09:26Z	sieving	PlotCalais02_/_Clay content - Percentage - sieving - Clay content
taxonIdCalais101	Soil acidity (pH)	5.05	nondimensional	2008-10-21T09:26Z	pH in water	PlotCalais02_/_Soil acidity (pH) - nondimensional - pH in water - Soil acidity (pH)
taxonIdCalais101	Availability of phosphorus	1.7	mg/dm3	2008-10-21T09:26Z	Extrator Mehlich 1	PlotCalais02_/_Availability of phosphorus - mg/dm3 - Extrator Mehlich 1 - Availability of phosphorus
taxonIdCalais101	Potassium availability	33	mg/dm3	2008-10-21T09:26Z	Extrator Mehlich 1	PlotCalais02_/_Potassium availability - mg/dm3 - Extrator Mehlich 1 - Potassium availability
taxonIdCalais101	Calcium availability	0.33	cmolc/dm3	2008-10-21T09:26Z	Extractor KCl 1mol/L	PlotCalais02_/_Calcium availability - cmolc/dm3 - Extractor KCl 1mol/L - Calcium availability
taxonIdCalais101	Magnesium availability	0.12	cmolc/dm3	2008-10-21T09:26Z	Extractor KCl 1mol/L	PlotCalais02_/_Magnesium availability - cmolc/dm3 - Extractor KCl 1mol/L - Magnesium availability
taxonIdCalais101	Aluminium avalaibility	1.18	cmolc/dm3	2008-10-21T09:26Z	Extractor KCl 1mol/L	PlotCalais02_/_Aluminium avalaibility - cmolc/dm3 - Extractor KCl 1mol/L - Aluminium avalaibility
taxonIdCalais101	Potential Acidity (H+AL)	4.9	cmolc/dm3	2008-10-21T09:26Z	Extractor Ca(CH3COO)2, 0.5mol/L, pH 7.0	PlotCalais02_/_Potential acidity (H+Al) - cmolc/dm3 - Extractor Ca(CH3COO)2, 0.5mol/L, pH 7.0 - Potential acidity (H+Al)
taxonIdCalais101	Interchangeable Bases	0.53	cmolc/dm3	2008-10-21T09:26Z	Interchangeable bases	PlotCalais02_/_Interchangeable bases - cmolc/dm3 - Interchangeable bases - Sum of Interchangeable bases
taxonIdCalais101	Effective cation exchange capacity	1.71	cmolc/dm3	2008-10-21T09:26Z	Effective cation exchange capacity	PlotCalais02_/_Effective cation exchange capacity - cmolc/dm3 - Effective cation exchange capacity - Effective cation exchange capacity
taxonIdCalais101	Cation exchange capacity at pH 7.0	5.43	cmolc/dm3	2008-10-21T09:26Z	Cation exchange capacity at pH 7.0	PlotCalais02_/_Cation exchange capacity at pH 7.0 - cmolc/dm3 - Cation exchange capacity at pH 7.0 - Cation exchange capacity at pH 7.0
taxonIdCalais101	Saturation of bases	9.8	Percentage	2008-10-21T09:26Z	Saturation of bases	PlotCalais02_/_Saturation of bases - Percentage - Saturation of bases - Saturation of bases
taxonIdCalais101	Saturation of aluminium	69	Percentage	2008-10-21T09:26Z	Saturation of aluminium	PlotCalais02_/_Saturation of aluminium - Percentage - Saturation of aluminium - Saturation of aluminium
taxonIdCalais101	Remaining phosphorus	38	mg/L	2008-10-21T09:26Z	Extraction with 0.01 mol/L CaCl2	PlotCalais02_/_Remaining phosphorus - mg/L - Remaining phosphorus - Remaining phosphorus
taxonIdCalais101	Rocky outcrops	5	Percentage	2008-10-21T09:26Z	Estimation	PlotCalais02_/_Rocky outcrops - Percentage - Estimation - Rocky outcrops
taxonIdCalais101	Inclination	5	Percentage	2008-10-21T09:26Z	Estimation	PlotCalais02_/_Inclination - Percentage - Estimation - Inclination
taxonIdCalais107	Coarse sand content	33	Percentage	2008-10-21T09:26Z	sieving	PlotCalais02_/_Coarse sand content - Percentage - sieving - Coarse sand content
taxonIdCalais107	Fine sand content	37	Percentage	2008-10-21T09:26Z	sieving	PlotCalais02_/_Fine sand content - Percentage - sieving - Fine sand content
taxonIdCalais107	Silt content	18	Percentage	2008-10-21T09:26Z	sieving	PlotCalais02_/_Silt content - Percentage - sieving - Silt content
taxonIdCalais107	Clay content	12	Percentage	2008-10-21T09:26Z	sieving	PlotCalais02_/_Clay content - Percentage - sieving - Clay content
taxonIdCalais107	Soil acidity (pH)	5.05	nondimensional	2008-10-21T09:26Z	pH in water	PlotCalais02_/_Soil acidity (pH) - nondimensional - pH in water - Soil acidity (pH)
taxonIdCalais107	Availability of phosphorus	1.7	mg/dm3	2008-10-21T09:26Z	Extrator Mehlich 1	PlotCalais02_/_Availability of phosphorus - mg/dm3 - Extrator Mehlich 1 - Availability of phosphorus
taxonIdCalais107	Potassium availability	33	mg/dm3	2008-10-21T09:26Z	Extrator Mehlich 1	PlotCalais02_/_Potassium availability - mg/dm3 - Extrator Mehlich 1 - Potassium availability
taxonIdCalais107	Calcium availability	0.33	cmolc/dm3	2008-10-21T09:26Z	Extractor KCl 1mol/L	PlotCalais02_/_Calcium availability - cmolc/dm3 - Extractor KCl 1mol/L - Calcium availability
taxonIdCalais107	Magnesium availability	0.12	cmolc/dm3	2008-10-21T09:26Z	Extractor KCl 1mol/L	PlotCalais02_/_Magnesium availability - cmolc/dm3 - Extractor KCl 1mol/L - Magnesium availability
taxonIdCalais107	Aluminium avalaibility	1.18	cmolc/dm3	2008-10-21T09:26Z	Extractor KCl 1mol/L	PlotCalais02_/_Aluminium avalaibility - cmolc/dm3 - Extractor KCl 1mol/L - Aluminium avalaibility
taxonIdCalais107	Potential Acidity (H+AL)	4.9	cmolc/dm3	2008-10-21T09:26Z	Extractor Ca(CH3COO)2, 0.5mol/L, pH 7.0	PlotCalais02_/_Potential acidity (H+Al) - cmolc/dm3 - Extractor Ca(CH3COO)2, 0.5mol/L, pH 7.0 - Potential acidity (H+Al)
taxonIdCalais107	Interchangeable Bases	0.53	cmolc/dm3	2008-10-21T09:26Z	Interchangeable bases	PlotCalais02_/_Interchangeable bases - cmolc/dm3 - Interchangeable bases - Sum of Interchangeable bases
taxonIdCalais107	Effective cation exchange capacity	1.71	cmolc/dm3	2008-10-21T09:26Z	Effective cation exchange capacity	PlotCalais02_/_Effective cation exchange capacity - cmolc/dm3 - Effective cation exchange capacity - Effective cation exchange capacity
taxonIdCalais107	Cation exchange capacity at pH 7.0	5.43	cmolc/dm3	2008-10-21T09:26Z	Cation exchange capacity at pH 7.0	PlotCalais02_/_Cation exchange capacity at pH 7.0 - cmolc/dm3 - Cation exchange capacity at pH 7.0 - Cation exchange capacity at pH 7.0
taxonIdCalais107	Saturation of bases	9.8	Percentage	2008-10-21T09:26Z	Saturation of bases	PlotCalais02_/_Saturation of bases - Percentage - Saturation of bases - Saturation of bases
taxonIdCalais107	Saturation of aluminium	69	Percentage	2008-10-21T09:26Z	Saturation of aluminium	PlotCalais02_/_Saturation of aluminium - Percentage - Saturation of aluminium - Saturation of aluminium
taxonIdCalais107	Remaining phosphorus	38	mg/L	2008-10-21T09:26Z	Extraction with 0.01 mol/L CaCl2	PlotCalais02_/_Remaining phosphorus - mg/L - Remaining phosphorus - Remaining phosphorus
taxonIdCalais107	Rocky outcrops	5	Percentage	2008-10-21T09:26Z	Estimation	PlotCalais02_/_Rocky outcrops - Percentage - Estimation - Rocky outcrops
taxonIdCalais107	Inclination	5	Percentage	2008-10-21T09:26Z	Estimation	PlotCalais02_/_Inclination - Percentage - Estimation - Inclination
taxonIdCalais006	Coarse sand content	36	Percentage	2008-10-21T09:26Z	sieving	PlotCalais03_/_Coarse sand content - Percentage - sieving - Coarse sand content
taxonIdCalais006	Fine sand content	36	Percentage	2008-10-21T09:26Z	sieving	PlotCalais03_/_Fine sand content - Percentage - sieving - Fine sand content
taxonIdCalais006	Silt content	16	Percentage	2008-10-21T09:26Z	sieving	PlotCalais03_/_Silt content - Percentage - sieving - Silt content
taxonIdCalais006	Clay content	12	Percentage	2008-10-21T09:26Z	sieving	PlotCalais03_/_Clay content - Percentage - sieving - Clay content
taxonIdCalais006	Soil acidity (pH)	5.35	nondimensional	2008-10-21T09:26Z	pH in water	PlotCalais03_/_Soil acidity (pH) - nondimensional - pH in water - Soil acidity (pH)
taxonIdCalais006	Availability of phosphorus	2.2	mg/dm3	2008-10-21T09:26Z	Extrator Mehlich 1	PlotCalais03_/_Availability of phosphorus - mg/dm3 - Extrator Mehlich 1 - Availability of phosphorus
taxonIdCalais006	Potassium availability	34	mg/dm3	2008-10-21T09:26Z	Extrator Mehlich 1	PlotCalais03_/_Potassium availability - mg/dm3 - Extrator Mehlich 1 - Potassium availability
taxonIdCalais006	Calcium availability	0.4	cmolc/dm3	2008-10-21T09:26Z	Extractor KCl 1mol/L	PlotCalais03_/_Calcium availability - cmolc/dm3 - Extractor KCl 1mol/L - Calcium availability
taxonIdCalais006	Magnesium availability	0.14	cmolc/dm3	2008-10-21T09:26Z	Extractor KCl 1mol/L	PlotCalais03_/_Magnesium availability - cmolc/dm3 - Extractor KCl 1mol/L - Magnesium availability
taxonIdCalais006	Aluminium avalaibility	1.07	cmolc/dm3	2008-10-21T09:26Z	Extractor KCl 1mol/L	PlotCalais03_/_Aluminium avalaibility - cmolc/dm3 - Extractor KCl 1mol/L - Aluminium avalaibility
taxonIdCalais006	Potential Acidity (H+AL)	5.3	cmolc/dm3	2008-10-21T09:26Z	Extractor Ca(CH3COO)2, 0.5mol/L, pH 7.0	PlotCalais03_/_Potential acidity (H+Al) - cmolc/dm3 - Extractor Ca(CH3COO)2, 0.5mol/L, pH 7.0 - Potential acidity (H+Al)
taxonIdCalais006	Interchangeable Bases	0.63	cmolc/dm3	2008-10-21T09:26Z	Interchangeable bases	PlotCalais03_/_Interchangeable bases - cmolc/dm3 - Interchangeable bases - Sum of Interchangeable bases
taxonIdCalais006	Effective cation exchange capacity	1.7	cmolc/dm3	2008-10-21T09:26Z	Effective cation exchange capacity	PlotCalais03_/_Effective cation exchange capacity - cmolc/dm3 - Effective cation exchange capacity - Effective cation exchange capacity
taxonIdCalais006	Cation exchange capacity at pH 7.0	5.93	cmolc/dm3	2008-10-21T09:26Z	Cation exchange capacity at pH 7.0	PlotCalais03_/_Cation exchange capacity at pH 7.0 - cmolc/dm3 - Cation exchange capacity at pH 7.0 - Cation exchange capacity at pH 7.0
taxonIdCalais006	Saturation of bases	10.6	Percentage	2008-10-21T09:26Z	Saturation of bases	PlotCalais03_/_Saturation of bases - Percentage - Saturation of bases - Saturation of bases
taxonIdCalais006	Saturation of aluminium	62.9	Percentage	2008-10-21T09:26Z	Saturation of aluminium	PlotCalais03_/_Saturation of aluminium - Percentage - Saturation of aluminium - Saturation of aluminium
taxonIdCalais006	Remaining phosphorus	38.3	mg/L	2008-10-21T09:26Z	Extraction with 0.01 mol/L CaCl2	PlotCalais03_/_Remaining phosphorus - mg/L - Remaining phosphorus - Remaining phosphorus
taxonIdCalais006	Rocky outcrops	25	Percentage	2008-10-21T09:26Z	Estimation	PlotCalais03_/_Rocky outcrops - Percentage - Estimation - Rocky outcrops
taxonIdCalais006	Inclination	20	Percentage	2008-10-21T09:26Z	Estimation	PlotCalais03_/_Inclination - Percentage - Estimation - Inclination
taxonIdCalais007	Coarse sand content	36	Percentage	2008-10-21T09:26Z	sieving	PlotCalais03_/_Coarse sand content - Percentage - sieving - Coarse sand content
taxonIdCalais007	Fine sand content	36	Percentage	2008-10-21T09:26Z	sieving	PlotCalais03_/_Fine sand content - Percentage - sieving - Fine sand content
taxonIdCalais007	Silt content	16	Percentage	2008-10-21T09:26Z	sieving	PlotCalais03_/_Silt content - Percentage - sieving - Silt content
taxonIdCalais007	Clay content	12	Percentage	2008-10-21T09:26Z	sieving	PlotCalais03_/_Clay content - Percentage - sieving - Clay content
taxonIdCalais007	Soil acidity (pH)	5.35	nondimensional	2008-10-21T09:26Z	pH in water	PlotCalais03_/_Soil acidity (pH) - nondimensional - pH in water - Soil acidity (pH)
taxonIdCalais007	Availability of phosphorus	2.2	mg/dm3	2008-10-21T09:26Z	Extrator Mehlich 1	PlotCalais03_/_Availability of phosphorus - mg/dm3 - Extrator Mehlich 1 - Availability of phosphorus
taxonIdCalais007	Potassium availability	34	mg/dm3	2008-10-21T09:26Z	Extrator Mehlich 1	PlotCalais03_/_Potassium availability - mg/dm3 - Extrator Mehlich 1 - Potassium availability
taxonIdCalais007	Calcium availability	0.4	cmolc/dm3	2008-10-21T09:26Z	Extractor KCl 1mol/L	PlotCalais03_/_Calcium availability - cmolc/dm3 - Extractor KCl 1mol/L - Calcium availability
taxonIdCalais007	Magnesium availability	0.14	cmolc/dm3	2008-10-21T09:26Z	Extractor KCl 1mol/L	PlotCalais03_/_Magnesium availability - cmolc/dm3 - Extractor KCl 1mol/L - Magnesium availability
taxonIdCalais007	Aluminium avalaibility	1.07	cmolc/dm3	2008-10-21T09:26Z	Extractor KCl 1mol/L	PlotCalais03_/_Aluminium avalaibility - cmolc/dm3 - Extractor KCl 1mol/L - Aluminium avalaibility
taxonIdCalais007	Potential Acidity (H+AL)	5.3	cmolc/dm3	2008-10-21T09:26Z	Extractor Ca(CH3COO)2, 0.5mol/L, pH 7.0	PlotCalais03_/_Potential acidity (H+Al) - cmolc/dm3 - Extractor Ca(CH3COO)2, 0.5mol/L, pH 7.0 - Potential acidity (H+Al)
taxonIdCalais007	Interchangeable Bases	0.63	cmolc/dm3	2008-10-21T09:26Z	Interchangeable bases	PlotCalais03_/_Interchangeable bases - cmolc/dm3 - Interchangeable bases - Sum of Interchangeable bases
taxonIdCalais007	Effective cation exchange capacity	1.7	cmolc/dm3	2008-10-21T09:26Z	Effective cation exchange capacity	PlotCalais03_/_Effective cation exchange capacity - cmolc/dm3 - Effective cation exchange capacity - Effective cation exchange capacity
taxonIdCalais007	Cation exchange capacity at pH 7.0	5.93	cmolc/dm3	2008-10-21T09:26Z	Cation exchange capacity at pH 7.0	PlotCalais03_/_Cation exchange capacity at pH 7.0 - cmolc/dm3 - Cation exchange capacity at pH 7.0 - Cation exchange capacity at pH 7.0
taxonIdCalais007	Saturation of bases	10.6	Percentage	2008-10-21T09:26Z	Saturation of bases	PlotCalais03_/_Saturation of bases - Percentage - Saturation of bases - Saturation of bases
taxonIdCalais007	Saturation of aluminium	62.9	Percentage	2008-10-21T09:26Z	Saturation of aluminium	PlotCalais03_/_Saturation of aluminium - Percentage - Saturation of aluminium - Saturation of aluminium
taxonIdCalais007	Remaining phosphorus	38.3	mg/L	2008-10-21T09:26Z	Extraction with 0.01 mol/L CaCl2	PlotCalais03_/_Remaining phosphorus - mg/L - Remaining phosphorus - Remaining phosphorus
taxonIdCalais007	Rocky outcrops	25	Percentage	2008-10-21T09:26Z	Estimation	PlotCalais03_/_Rocky outcrops - Percentage - Estimation - Rocky outcrops
taxonIdCalais007	Inclination	20	Percentage	2008-10-21T09:26Z	Estimation	PlotCalais03_/_Inclination - Percentage - Estimation - Inclination
taxonIdCalais008	Coarse sand content	36	Percentage	2008-10-21T09:26Z	sieving	PlotCalais03_/_Coarse sand content - Percentage - sieving - Coarse sand content
taxonIdCalais008	Fine sand content	36	Percentage	2008-10-21T09:26Z	sieving	PlotCalais03_/_Fine sand content - Percentage - sieving - Fine sand content
taxonIdCalais008	Silt content	16	Percentage	2008-10-21T09:26Z	sieving	PlotCalais03_/_Silt content - Percentage - sieving - Silt content
taxonIdCalais008	Clay content	12	Percentage	2008-10-21T09:26Z	sieving	PlotCalais03_/_Clay content - Percentage - sieving - Clay content
taxonIdCalais008	Soil acidity (pH)	5.35	nondimensional	2008-10-21T09:26Z	pH in water	PlotCalais03_/_Soil acidity (pH) - nondimensional - pH in water - Soil acidity (pH)
taxonIdCalais008	Availability of phosphorus	2.2	mg/dm3	2008-10-21T09:26Z	Extrator Mehlich 1	PlotCalais03_/_Availability of phosphorus - mg/dm3 - Extrator Mehlich 1 - Availability of phosphorus
taxonIdCalais008	Potassium availability	34	mg/dm3	2008-10-21T09:26Z	Extrator Mehlich 1	PlotCalais03_/_Potassium availability - mg/dm3 - Extrator Mehlich 1 - Potassium availability
taxonIdCalais008	Calcium availability	0.4	cmolc/dm3	2008-10-21T09:26Z	Extractor KCl 1mol/L	PlotCalais03_/_Calcium availability - cmolc/dm3 - Extractor KCl 1mol/L - Calcium availability
taxonIdCalais008	Magnesium availability	0.14	cmolc/dm3	2008-10-21T09:26Z	Extractor KCl 1mol/L	PlotCalais03_/_Magnesium availability - cmolc/dm3 - Extractor KCl 1mol/L - Magnesium availability
taxonIdCalais008	Aluminium avalaibility	1.07	cmolc/dm3	2008-10-21T09:26Z	Extractor KCl 1mol/L	PlotCalais03_/_Aluminium avalaibility - cmolc/dm3 - Extractor KCl 1mol/L - Aluminium avalaibility
taxonIdCalais008	Potential Acidity (H+AL)	5.3	cmolc/dm3	2008-10-21T09:26Z	Extractor Ca(CH3COO)2, 0.5mol/L, pH 7.0	PlotCalais03_/_Potential acidity (H+Al) - cmolc/dm3 - Extractor Ca(CH3COO)2, 0.5mol/L, pH 7.0 - Potential acidity (H+Al)
taxonIdCalais008	Interchangeable Bases	0.63	cmolc/dm3	2008-10-21T09:26Z	Interchangeable bases	PlotCalais03_/_Interchangeable bases - cmolc/dm3 - Interchangeable bases - Sum of Interchangeable bases
taxonIdCalais008	Effective cation exchange capacity	1.7	cmolc/dm3	2008-10-21T09:26Z	Effective cation exchange capacity	PlotCalais03_/_Effective cation exchange capacity - cmolc/dm3 - Effective cation exchange capacity - Effective cation exchange capacity
taxonIdCalais008	Cation exchange capacity at pH 7.0	5.93	cmolc/dm3	2008-10-21T09:26Z	Cation exchange capacity at pH 7.0	PlotCalais03_/_Cation exchange capacity at pH 7.0 - cmolc/dm3 - Cation exchange capacity at pH 7.0 - Cation exchange capacity at pH 7.0
taxonIdCalais008	Saturation of bases	10.6	Percentage	2008-10-21T09:26Z	Saturation of bases	PlotCalais03_/_Saturation of bases - Percentage - Saturation of bases - Saturation of bases
taxonIdCalais008	Saturation of aluminium	62.9	Percentage	2008-10-21T09:26Z	Saturation of aluminium	PlotCalais03_/_Saturation of aluminium - Percentage - Saturation of aluminium - Saturation of aluminium
taxonIdCalais008	Remaining phosphorus	38.3	mg/L	2008-10-21T09:26Z	Extraction with 0.01 mol/L CaCl2	PlotCalais03_/_Remaining phosphorus - mg/L - Remaining phosphorus - Remaining phosphorus
taxonIdCalais008	Rocky outcrops	25	Percentage	2008-10-21T09:26Z	Estimation	PlotCalais03_/_Rocky outcrops - Percentage - Estimation - Rocky outcrops
taxonIdCalais008	Inclination	20	Percentage	2008-10-21T09:26Z	Estimation	PlotCalais03_/_Inclination - Percentage - Estimation - Inclination
taxonIdCalais010	Coarse sand content	36	Percentage	2008-10-21T09:26Z	sieving	PlotCalais03_/_Coarse sand content - Percentage - sieving - Coarse sand content
taxonIdCalais010	Fine sand content	36	Percentage	2008-10-21T09:26Z	sieving	PlotCalais03_/_Fine sand content - Percentage - sieving - Fine sand content
taxonIdCalais010	Silt content	16	Percentage	2008-10-21T09:26Z	sieving	PlotCalais03_/_Silt content - Percentage - sieving - Silt content
taxonIdCalais010	Clay content	12	Percentage	2008-10-21T09:26Z	sieving	PlotCalais03_/_Clay content - Percentage - sieving - Clay content
taxonIdCalais010	Soil acidity (pH)	5.35	nondimensional	2008-10-21T09:26Z	pH in water	PlotCalais03_/_Soil acidity (pH) - nondimensional - pH in water - Soil acidity (pH)
taxonIdCalais010	Availability of phosphorus	2.2	mg/dm3	2008-10-21T09:26Z	Extrator Mehlich 1	PlotCalais03_/_Availability of phosphorus - mg/dm3 - Extrator Mehlich 1 - Availability of phosphorus
taxonIdCalais010	Potassium availability	34	mg/dm3	2008-10-21T09:26Z	Extrator Mehlich 1	PlotCalais03_/_Potassium availability - mg/dm3 - Extrator Mehlich 1 - Potassium availability
taxonIdCalais010	Calcium availability	0.4	cmolc/dm3	2008-10-21T09:26Z	Extractor KCl 1mol/L	PlotCalais03_/_Calcium availability - cmolc/dm3 - Extractor KCl 1mol/L - Calcium availability
taxonIdCalais010	Magnesium availability	0.14	cmolc/dm3	2008-10-21T09:26Z	Extractor KCl 1mol/L	PlotCalais03_/_Magnesium availability - cmolc/dm3 - Extractor KCl 1mol/L - Magnesium availability
taxonIdCalais010	Aluminium avalaibility	1.07	cmolc/dm3	2008-10-21T09:26Z	Extractor KCl 1mol/L	PlotCalais03_/_Aluminium avalaibility - cmolc/dm3 - Extractor KCl 1mol/L - Aluminium avalaibility
taxonIdCalais010	Potential Acidity (H+AL)	5.3	cmolc/dm3	2008-10-21T09:26Z	Extractor Ca(CH3COO)2, 0.5mol/L, pH 7.0	PlotCalais03_/_Potential acidity (H+Al) - cmolc/dm3 - Extractor Ca(CH3COO)2, 0.5mol/L, pH 7.0 - Potential acidity (H+Al)
taxonIdCalais010	Interchangeable Bases	0.63	cmolc/dm3	2008-10-21T09:26Z	Interchangeable bases	PlotCalais03_/_Interchangeable bases - cmolc/dm3 - Interchangeable bases - Sum of Interchangeable bases
taxonIdCalais010	Effective cation exchange capacity	1.7	cmolc/dm3	2008-10-21T09:26Z	Effective cation exchange capacity	PlotCalais03_/_Effective cation exchange capacity - cmolc/dm3 - Effective cation exchange capacity - Effective cation exchange capacity
taxonIdCalais010	Cation exchange capacity at pH 7.0	5.93	cmolc/dm3	2008-10-21T09:26Z	Cation exchange capacity at pH 7.0	PlotCalais03_/_Cation exchange capacity at pH 7.0 - cmolc/dm3 - Cation exchange capacity at pH 7.0 - Cation exchange capacity at pH 7.0
taxonIdCalais010	Saturation of bases	10.6	Percentage	2008-10-21T09:26Z	Saturation of bases	PlotCalais03_/_Saturation of bases - Percentage - Saturation of bases - Saturation of bases
taxonIdCalais010	Saturation of aluminium	62.9	Percentage	2008-10-21T09:26Z	Saturation of aluminium	PlotCalais03_/_Saturation of aluminium - Percentage - Saturation of aluminium - Saturation of aluminium
taxonIdCalais010	Remaining phosphorus	38.3	mg/L	2008-10-21T09:26Z	Extraction with 0.01 mol/L CaCl2	PlotCalais03_/_Remaining phosphorus - mg/L - Remaining phosphorus - Remaining phosphorus
taxonIdCalais010	Rocky outcrops	25	Percentage	2008-10-21T09:26Z	Estimation	PlotCalais03_/_Rocky outcrops - Percentage - Estimation - Rocky outcrops
taxonIdCalais010	Inclination	20	Percentage	2008-10-21T09:26Z	Estimation	PlotCalais03_/_Inclination - Percentage - Estimation - Inclination
taxonIdCalais011	Coarse sand content	36	Percentage	2008-10-21T09:26Z	sieving	PlotCalais03_/_Coarse sand content - Percentage - sieving - Coarse sand content
taxonIdCalais011	Fine sand content	36	Percentage	2008-10-21T09:26Z	sieving	PlotCalais03_/_Fine sand content - Percentage - sieving - Fine sand content
taxonIdCalais011	Silt content	16	Percentage	2008-10-21T09:26Z	sieving	PlotCalais03_/_Silt content - Percentage - sieving - Silt content
taxonIdCalais011	Clay content	12	Percentage	2008-10-21T09:26Z	sieving	PlotCalais03_/_Clay content - Percentage - sieving - Clay content
taxonIdCalais011	Soil acidity (pH)	5.35	nondimensional	2008-10-21T09:26Z	pH in water	PlotCalais03_/_Soil acidity (pH) - nondimensional - pH in water - Soil acidity (pH)
taxonIdCalais011	Availability of phosphorus	2.2	mg/dm3	2008-10-21T09:26Z	Extrator Mehlich 1	PlotCalais03_/_Availability of phosphorus - mg/dm3 - Extrator Mehlich 1 - Availability of phosphorus
taxonIdCalais011	Potassium availability	34	mg/dm3	2008-10-21T09:26Z	Extrator Mehlich 1	PlotCalais03_/_Potassium availability - mg/dm3 - Extrator Mehlich 1 - Potassium availability
taxonIdCalais011	Calcium availability	0.4	cmolc/dm3	2008-10-21T09:26Z	Extractor KCl 1mol/L	PlotCalais03_/_Calcium availability - cmolc/dm3 - Extractor KCl 1mol/L - Calcium availability
taxonIdCalais011	Magnesium availability	0.14	cmolc/dm3	2008-10-21T09:26Z	Extractor KCl 1mol/L	PlotCalais03_/_Magnesium availability - cmolc/dm3 - Extractor KCl 1mol/L - Magnesium availability
taxonIdCalais011	Aluminium avalaibility	1.07	cmolc/dm3	2008-10-21T09:26Z	Extractor KCl 1mol/L	PlotCalais03_/_Aluminium avalaibility - cmolc/dm3 - Extractor KCl 1mol/L - Aluminium avalaibility
taxonIdCalais011	Potential Acidity (H+AL)	5.3	cmolc/dm3	2008-10-21T09:26Z	Extractor Ca(CH3COO)2, 0.5mol/L, pH 7.0	PlotCalais03_/_Potential acidity (H+Al) - cmolc/dm3 - Extractor Ca(CH3COO)2, 0.5mol/L, pH 7.0 - Potential acidity (H+Al)
taxonIdCalais011	Interchangeable Bases	0.63	cmolc/dm3	2008-10-21T09:26Z	Interchangeable bases	PlotCalais03_/_Interchangeable bases - cmolc/dm3 - Interchangeable bases - Sum of Interchangeable bases
taxonIdCalais011	Effective cation exchange capacity	1.7	cmolc/dm3	2008-10-21T09:26Z	Effective cation exchange capacity	PlotCalais03_/_Effective cation exchange capacity - cmolc/dm3 - Effective cation exchange capacity - Effective cation exchange capacity
taxonIdCalais011	Cation exchange capacity at pH 7.0	5.93	cmolc/dm3	2008-10-21T09:26Z	Cation exchange capacity at pH 7.0	PlotCalais03_/_Cation exchange capacity at pH 7.0 - cmolc/dm3 - Cation exchange capacity at pH 7.0 - Cation exchange capacity at pH 7.0
taxonIdCalais011	Saturation of bases	10.6	Percentage	2008-10-21T09:26Z	Saturation of bases	PlotCalais03_/_Saturation of bases - Percentage - Saturation of bases - Saturation of bases
taxonIdCalais011	Saturation of aluminium	62.9	Percentage	2008-10-21T09:26Z	Saturation of aluminium	PlotCalais03_/_Saturation of aluminium - Percentage - Saturation of aluminium - Saturation of aluminium
taxonIdCalais011	Remaining phosphorus	38.3	mg/L	2008-10-21T09:26Z	Extraction with 0.01 mol/L CaCl2	PlotCalais03_/_Remaining phosphorus - mg/L - Remaining phosphorus - Remaining phosphorus
taxonIdCalais011	Rocky outcrops	25	Percentage	2008-10-21T09:26Z	Estimation	PlotCalais03_/_Rocky outcrops - Percentage - Estimation - Rocky outcrops
taxonIdCalais011	Inclination	20	Percentage	2008-10-21T09:26Z	Estimation	PlotCalais03_/_Inclination - Percentage - Estimation - Inclination
taxonIdCalais013	Coarse sand content	36	Percentage	2008-10-21T09:26Z	sieving	PlotCalais03_/_Coarse sand content - Percentage - sieving - Coarse sand content
taxonIdCalais013	Fine sand content	36	Percentage	2008-10-21T09:26Z	sieving	PlotCalais03_/_Fine sand content - Percentage - sieving - Fine sand content
taxonIdCalais013	Silt content	16	Percentage	2008-10-21T09:26Z	sieving	PlotCalais03_/_Silt content - Percentage - sieving - Silt content
taxonIdCalais013	Clay content	12	Percentage	2008-10-21T09:26Z	sieving	PlotCalais03_/_Clay content - Percentage - sieving - Clay content
taxonIdCalais013	Soil acidity (pH)	5.35	nondimensional	2008-10-21T09:26Z	pH in water	PlotCalais03_/_Soil acidity (pH) - nondimensional - pH in water - Soil acidity (pH)
taxonIdCalais013	Availability of phosphorus	2.2	mg/dm3	2008-10-21T09:26Z	Extrator Mehlich 1	PlotCalais03_/_Availability of phosphorus - mg/dm3 - Extrator Mehlich 1 - Availability of phosphorus
taxonIdCalais013	Potassium availability	34	mg/dm3	2008-10-21T09:26Z	Extrator Mehlich 1	PlotCalais03_/_Potassium availability - mg/dm3 - Extrator Mehlich 1 - Potassium availability
taxonIdCalais013	Calcium availability	0.4	cmolc/dm3	2008-10-21T09:26Z	Extractor KCl 1mol/L	PlotCalais03_/_Calcium availability - cmolc/dm3 - Extractor KCl 1mol/L - Calcium availability
taxonIdCalais013	Magnesium availability	0.14	cmolc/dm3	2008-10-21T09:26Z	Extractor KCl 1mol/L	PlotCalais03_/_Magnesium availability - cmolc/dm3 - Extractor KCl 1mol/L - Magnesium availability
taxonIdCalais013	Aluminium avalaibility	1.07	cmolc/dm3	2008-10-21T09:26Z	Extractor KCl 1mol/L	PlotCalais03_/_Aluminium avalaibility - cmolc/dm3 - Extractor KCl 1mol/L - Aluminium avalaibility
taxonIdCalais013	Potential Acidity (H+AL)	5.3	cmolc/dm3	2008-10-21T09:26Z	Extractor Ca(CH3COO)2, 0.5mol/L, pH 7.0	PlotCalais03_/_Potential acidity (H+Al) - cmolc/dm3 - Extractor Ca(CH3COO)2, 0.5mol/L, pH 7.0 - Potential acidity (H+Al)
taxonIdCalais013	Interchangeable Bases	0.63	cmolc/dm3	2008-10-21T09:26Z	Interchangeable bases	PlotCalais03_/_Interchangeable bases - cmolc/dm3 - Interchangeable bases - Sum of Interchangeable bases
taxonIdCalais013	Effective cation exchange capacity	1.7	cmolc/dm3	2008-10-21T09:26Z	Effective cation exchange capacity	PlotCalais03_/_Effective cation exchange capacity - cmolc/dm3 - Effective cation exchange capacity - Effective cation exchange capacity
taxonIdCalais013	Cation exchange capacity at pH 7.0	5.93	cmolc/dm3	2008-10-21T09:26Z	Cation exchange capacity at pH 7.0	PlotCalais03_/_Cation exchange capacity at pH 7.0 - cmolc/dm3 - Cation exchange capacity at pH 7.0 - Cation exchange capacity at pH 7.0
taxonIdCalais013	Saturation of bases	10.6	Percentage	2008-10-21T09:26Z	Saturation of bases	PlotCalais03_/_Saturation of bases - Percentage - Saturation of bases - Saturation of bases
taxonIdCalais013	Saturation of aluminium	62.9	Percentage	2008-10-21T09:26Z	Saturation of aluminium	PlotCalais03_/_Saturation of aluminium - Percentage - Saturation of aluminium - Saturation of aluminium
taxonIdCalais013	Remaining phosphorus	38.3	mg/L	2008-10-21T09:26Z	Extraction with 0.01 mol/L CaCl2	PlotCalais03_/_Remaining phosphorus - mg/L - Remaining phosphorus - Remaining phosphorus
taxonIdCalais013	Rocky outcrops	25	Percentage	2008-10-21T09:26Z	Estimation	PlotCalais03_/_Rocky outcrops - Percentage - Estimation - Rocky outcrops
taxonIdCalais013	Inclination	20	Percentage	2008-10-21T09:26Z	Estimation	PlotCalais03_/_Inclination - Percentage - Estimation - Inclination
taxonIdCalais014	Coarse sand content	36	Percentage	2008-10-21T09:26Z	sieving	PlotCalais03_/_Coarse sand content - Percentage - sieving - Coarse sand content
taxonIdCalais014	Fine sand content	36	Percentage	2008-10-21T09:26Z	sieving	PlotCalais03_/_Fine sand content - Percentage - sieving - Fine sand content
taxonIdCalais014	Silt content	16	Percentage	2008-10-21T09:26Z	sieving	PlotCalais03_/_Silt content - Percentage - sieving - Silt content
taxonIdCalais014	Clay content	12	Percentage	2008-10-21T09:26Z	sieving	PlotCalais03_/_Clay content - Percentage - sieving - Clay content
taxonIdCalais014	Soil acidity (pH)	5.35	nondimensional	2008-10-21T09:26Z	pH in water	PlotCalais03_/_Soil acidity (pH) - nondimensional - pH in water - Soil acidity (pH)
taxonIdCalais014	Availability of phosphorus	2.2	mg/dm3	2008-10-21T09:26Z	Extrator Mehlich 1	PlotCalais03_/_Availability of phosphorus - mg/dm3 - Extrator Mehlich 1 - Availability of phosphorus
taxonIdCalais014	Potassium availability	34	mg/dm3	2008-10-21T09:26Z	Extrator Mehlich 1	PlotCalais03_/_Potassium availability - mg/dm3 - Extrator Mehlich 1 - Potassium availability
taxonIdCalais014	Calcium availability	0.4	cmolc/dm3	2008-10-21T09:26Z	Extractor KCl 1mol/L	PlotCalais03_/_Calcium availability - cmolc/dm3 - Extractor KCl 1mol/L - Calcium availability
taxonIdCalais014	Magnesium availability	0.14	cmolc/dm3	2008-10-21T09:26Z	Extractor KCl 1mol/L	PlotCalais03_/_Magnesium availability - cmolc/dm3 - Extractor KCl 1mol/L - Magnesium availability
taxonIdCalais014	Aluminium avalaibility	1.07	cmolc/dm3	2008-10-21T09:26Z	Extractor KCl 1mol/L	PlotCalais03_/_Aluminium avalaibility - cmolc/dm3 - Extractor KCl 1mol/L - Aluminium avalaibility
taxonIdCalais014	Potential Acidity (H+AL)	5.3	cmolc/dm3	2008-10-21T09:26Z	Extractor Ca(CH3COO)2, 0.5mol/L, pH 7.0	PlotCalais03_/_Potential acidity (H+Al) - cmolc/dm3 - Extractor Ca(CH3COO)2, 0.5mol/L, pH 7.0 - Potential acidity (H+Al)
taxonIdCalais014	Interchangeable Bases	0.63	cmolc/dm3	2008-10-21T09:26Z	Interchangeable bases	PlotCalais03_/_Interchangeable bases - cmolc/dm3 - Interchangeable bases - Sum of Interchangeable bases
taxonIdCalais014	Effective cation exchange capacity	1.7	cmolc/dm3	2008-10-21T09:26Z	Effective cation exchange capacity	PlotCalais03_/_Effective cation exchange capacity - cmolc/dm3 - Effective cation exchange capacity - Effective cation exchange capacity
taxonIdCalais014	Cation exchange capacity at pH 7.0	5.93	cmolc/dm3	2008-10-21T09:26Z	Cation exchange capacity at pH 7.0	PlotCalais03_/_Cation exchange capacity at pH 7.0 - cmolc/dm3 - Cation exchange capacity at pH 7.0 - Cation exchange capacity at pH 7.0
taxonIdCalais014	Saturation of bases	10.6	Percentage	2008-10-21T09:26Z	Saturation of bases	PlotCalais03_/_Saturation of bases - Percentage - Saturation of bases - Saturation of bases
taxonIdCalais014	Saturation of aluminium	62.9	Percentage	2008-10-21T09:26Z	Saturation of aluminium	PlotCalais03_/_Saturation of aluminium - Percentage - Saturation of aluminium - Saturation of aluminium
taxonIdCalais014	Remaining phosphorus	38.3	mg/L	2008-10-21T09:26Z	Extraction with 0.01 mol/L CaCl2	PlotCalais03_/_Remaining phosphorus - mg/L - Remaining phosphorus - Remaining phosphorus
taxonIdCalais014	Rocky outcrops	25	Percentage	2008-10-21T09:26Z	Estimation	PlotCalais03_/_Rocky outcrops - Percentage - Estimation - Rocky outcrops
taxonIdCalais014	Inclination	20	Percentage	2008-10-21T09:26Z	Estimation	PlotCalais03_/_Inclination - Percentage - Estimation - Inclination
taxonIdCalais015	Coarse sand content	36	Percentage	2008-10-21T09:26Z	sieving	PlotCalais03_/_Coarse sand content - Percentage - sieving - Coarse sand content
taxonIdCalais015	Fine sand content	36	Percentage	2008-10-21T09:26Z	sieving	PlotCalais03_/_Fine sand content - Percentage - sieving - Fine sand content
taxonIdCalais015	Silt content	16	Percentage	2008-10-21T09:26Z	sieving	PlotCalais03_/_Silt content - Percentage - sieving - Silt content
taxonIdCalais015	Clay content	12	Percentage	2008-10-21T09:26Z	sieving	PlotCalais03_/_Clay content - Percentage - sieving - Clay content
taxonIdCalais015	Soil acidity (pH)	5.35	nondimensional	2008-10-21T09:26Z	pH in water	PlotCalais03_/_Soil acidity (pH) - nondimensional - pH in water - Soil acidity (pH)
taxonIdCalais015	Availability of phosphorus	2.2	mg/dm3	2008-10-21T09:26Z	Extrator Mehlich 1	PlotCalais03_/_Availability of phosphorus - mg/dm3 - Extrator Mehlich 1 - Availability of phosphorus
taxonIdCalais015	Potassium availability	34	mg/dm3	2008-10-21T09:26Z	Extrator Mehlich 1	PlotCalais03_/_Potassium availability - mg/dm3 - Extrator Mehlich 1 - Potassium availability
taxonIdCalais015	Calcium availability	0.4	cmolc/dm3	2008-10-21T09:26Z	Extractor KCl 1mol/L	PlotCalais03_/_Calcium availability - cmolc/dm3 - Extractor KCl 1mol/L - Calcium availability
taxonIdCalais015	Magnesium availability	0.14	cmolc/dm3	2008-10-21T09:26Z	Extractor KCl 1mol/L	PlotCalais03_/_Magnesium availability - cmolc/dm3 - Extractor KCl 1mol/L - Magnesium availability
taxonIdCalais015	Aluminium avalaibility	1.07	cmolc/dm3	2008-10-21T09:26Z	Extractor KCl 1mol/L	PlotCalais03_/_Aluminium avalaibility - cmolc/dm3 - Extractor KCl 1mol/L - Aluminium avalaibility
taxonIdCalais015	Potential Acidity (H+AL)	5.3	cmolc/dm3	2008-10-21T09:26Z	Extractor Ca(CH3COO)2, 0.5mol/L, pH 7.0	PlotCalais03_/_Potential acidity (H+Al) - cmolc/dm3 - Extractor Ca(CH3COO)2, 0.5mol/L, pH 7.0 - Potential acidity (H+Al)
taxonIdCalais015	Interchangeable Bases	0.63	cmolc/dm3	2008-10-21T09:26Z	Interchangeable bases	PlotCalais03_/_Interchangeable bases - cmolc/dm3 - Interchangeable bases - Sum of Interchangeable bases
taxonIdCalais015	Effective cation exchange capacity	1.7	cmolc/dm3	2008-10-21T09:26Z	Effective cation exchange capacity	PlotCalais03_/_Effective cation exchange capacity - cmolc/dm3 - Effective cation exchange capacity - Effective cation exchange capacity
taxonIdCalais015	Cation exchange capacity at pH 7.0	5.93	cmolc/dm3	2008-10-21T09:26Z	Cation exchange capacity at pH 7.0	PlotCalais03_/_Cation exchange capacity at pH 7.0 - cmolc/dm3 - Cation exchange capacity at pH 7.0 - Cation exchange capacity at pH 7.0
taxonIdCalais015	Saturation of bases	10.6	Percentage	2008-10-21T09:26Z	Saturation of bases	PlotCalais03_/_Saturation of bases - Percentage - Saturation of bases - Saturation of bases
taxonIdCalais015	Saturation of aluminium	62.9	Percentage	2008-10-21T09:26Z	Saturation of aluminium	PlotCalais03_/_Saturation of aluminium - Percentage - Saturation of aluminium - Saturation of aluminium
taxonIdCalais015	Remaining phosphorus	38.3	mg/L	2008-10-21T09:26Z	Extraction with 0.01 mol/L CaCl2	PlotCalais03_/_Remaining phosphorus - mg/L - Remaining phosphorus - Remaining phosphorus
taxonIdCalais015	Rocky outcrops	25	Percentage	2008-10-21T09:26Z	Estimation	PlotCalais03_/_Rocky outcrops - Percentage - Estimation - Rocky outcrops
taxonIdCalais015	Inclination	20	Percentage	2008-10-21T09:26Z	Estimation	PlotCalais03_/_Inclination - Percentage - Estimation - Inclination
taxonIdCalais016	Coarse sand content	36	Percentage	2008-10-21T09:26Z	sieving	PlotCalais03_/_Coarse sand content - Percentage - sieving - Coarse sand content
taxonIdCalais016	Fine sand content	36	Percentage	2008-10-21T09:26Z	sieving	PlotCalais03_/_Fine sand content - Percentage - sieving - Fine sand content
taxonIdCalais016	Silt content	16	Percentage	2008-10-21T09:26Z	sieving	PlotCalais03_/_Silt content - Percentage - sieving - Silt content
taxonIdCalais016	Clay content	12	Percentage	2008-10-21T09:26Z	sieving	PlotCalais03_/_Clay content - Percentage - sieving - Clay content
taxonIdCalais016	Soil acidity (pH)	5.35	nondimensional	2008-10-21T09:26Z	pH in water	PlotCalais03_/_Soil acidity (pH) - nondimensional - pH in water - Soil acidity (pH)
taxonIdCalais016	Availability of phosphorus	2.2	mg/dm3	2008-10-21T09:26Z	Extrator Mehlich 1	PlotCalais03_/_Availability of phosphorus - mg/dm3 - Extrator Mehlich 1 - Availability of phosphorus
taxonIdCalais016	Potassium availability	34	mg/dm3	2008-10-21T09:26Z	Extrator Mehlich 1	PlotCalais03_/_Potassium availability - mg/dm3 - Extrator Mehlich 1 - Potassium availability
taxonIdCalais016	Calcium availability	0.4	cmolc/dm3	2008-10-21T09:26Z	Extractor KCl 1mol/L	PlotCalais03_/_Calcium availability - cmolc/dm3 - Extractor KCl 1mol/L - Calcium availability
taxonIdCalais016	Magnesium availability	0.14	cmolc/dm3	2008-10-21T09:26Z	Extractor KCl 1mol/L	PlotCalais03_/_Magnesium availability - cmolc/dm3 - Extractor KCl 1mol/L - Magnesium availability
taxonIdCalais016	Aluminium avalaibility	1.07	cmolc/dm3	2008-10-21T09:26Z	Extractor KCl 1mol/L	PlotCalais03_/_Aluminium avalaibility - cmolc/dm3 - Extractor KCl 1mol/L - Aluminium avalaibility
taxonIdCalais016	Potential Acidity (H+AL)	5.3	cmolc/dm3	2008-10-21T09:26Z	Extractor Ca(CH3COO)2, 0.5mol/L, pH 7.0	PlotCalais03_/_Potential acidity (H+Al) - cmolc/dm3 - Extractor Ca(CH3COO)2, 0.5mol/L, pH 7.0 - Potential acidity (H+Al)
taxonIdCalais016	Interchangeable Bases	0.63	cmolc/dm3	2008-10-21T09:26Z	Interchangeable bases	PlotCalais03_/_Interchangeable bases - cmolc/dm3 - Interchangeable bases - Sum of Interchangeable bases
taxonIdCalais016	Effective cation exchange capacity	1.7	cmolc/dm3	2008-10-21T09:26Z	Effective cation exchange capacity	PlotCalais03_/_Effective cation exchange capacity - cmolc/dm3 - Effective cation exchange capacity - Effective cation exchange capacity
taxonIdCalais016	Cation exchange capacity at pH 7.0	5.93	cmolc/dm3	2008-10-21T09:26Z	Cation exchange capacity at pH 7.0	PlotCalais03_/_Cation exchange capacity at pH 7.0 - cmolc/dm3 - Cation exchange capacity at pH 7.0 - Cation exchange capacity at pH 7.0
taxonIdCalais016	Saturation of bases	10.6	Percentage	2008-10-21T09:26Z	Saturation of bases	PlotCalais03_/_Saturation of bases - Percentage - Saturation of bases - Saturation of bases
taxonIdCalais016	Saturation of aluminium	62.9	Percentage	2008-10-21T09:26Z	Saturation of aluminium	PlotCalais03_/_Saturation of aluminium - Percentage - Saturation of aluminium - Saturation of aluminium
taxonIdCalais016	Remaining phosphorus	38.3	mg/L	2008-10-21T09:26Z	Extraction with 0.01 mol/L CaCl2	PlotCalais03_/_Remaining phosphorus - mg/L - Remaining phosphorus - Remaining phosphorus
taxonIdCalais016	Rocky outcrops	25	Percentage	2008-10-21T09:26Z	Estimation	PlotCalais03_/_Rocky outcrops - Percentage - Estimation - Rocky outcrops
taxonIdCalais016	Inclination	20	Percentage	2008-10-21T09:26Z	Estimation	PlotCalais03_/_Inclination - Percentage - Estimation - Inclination
taxonIdCalais020	Coarse sand content	36	Percentage	2008-10-21T09:26Z	sieving	PlotCalais03_/_Coarse sand content - Percentage - sieving - Coarse sand content
taxonIdCalais020	Fine sand content	36	Percentage	2008-10-21T09:26Z	sieving	PlotCalais03_/_Fine sand content - Percentage - sieving - Fine sand content
taxonIdCalais020	Silt content	16	Percentage	2008-10-21T09:26Z	sieving	PlotCalais03_/_Silt content - Percentage - sieving - Silt content
taxonIdCalais020	Clay content	12	Percentage	2008-10-21T09:26Z	sieving	PlotCalais03_/_Clay content - Percentage - sieving - Clay content
taxonIdCalais020	Soil acidity (pH)	5.35	nondimensional	2008-10-21T09:26Z	pH in water	PlotCalais03_/_Soil acidity (pH) - nondimensional - pH in water - Soil acidity (pH)
taxonIdCalais020	Availability of phosphorus	2.2	mg/dm3	2008-10-21T09:26Z	Extrator Mehlich 1	PlotCalais03_/_Availability of phosphorus - mg/dm3 - Extrator Mehlich 1 - Availability of phosphorus
taxonIdCalais020	Potassium availability	34	mg/dm3	2008-10-21T09:26Z	Extrator Mehlich 1	PlotCalais03_/_Potassium availability - mg/dm3 - Extrator Mehlich 1 - Potassium availability
taxonIdCalais020	Calcium availability	0.4	cmolc/dm3	2008-10-21T09:26Z	Extractor KCl 1mol/L	PlotCalais03_/_Calcium availability - cmolc/dm3 - Extractor KCl 1mol/L - Calcium availability
taxonIdCalais020	Magnesium availability	0.14	cmolc/dm3	2008-10-21T09:26Z	Extractor KCl 1mol/L	PlotCalais03_/_Magnesium availability - cmolc/dm3 - Extractor KCl 1mol/L - Magnesium availability
taxonIdCalais020	Aluminium avalaibility	1.07	cmolc/dm3	2008-10-21T09:26Z	Extractor KCl 1mol/L	PlotCalais03_/_Aluminium avalaibility - cmolc/dm3 - Extractor KCl 1mol/L - Aluminium avalaibility
taxonIdCalais020	Potential Acidity (H+AL)	5.3	cmolc/dm3	2008-10-21T09:26Z	Extractor Ca(CH3COO)2, 0.5mol/L, pH 7.0	PlotCalais03_/_Potential acidity (H+Al) - cmolc/dm3 - Extractor Ca(CH3COO)2, 0.5mol/L, pH 7.0 - Potential acidity (H+Al)
taxonIdCalais020	Interchangeable Bases	0.63	cmolc/dm3	2008-10-21T09:26Z	Interchangeable bases	PlotCalais03_/_Interchangeable bases - cmolc/dm3 - Interchangeable bases - Sum of Interchangeable bases
taxonIdCalais020	Effective cation exchange capacity	1.7	cmolc/dm3	2008-10-21T09:26Z	Effective cation exchange capacity	PlotCalais03_/_Effective cation exchange capacity - cmolc/dm3 - Effective cation exchange capacity - Effective cation exchange capacity
taxonIdCalais020	Cation exchange capacity at pH 7.0	5.93	cmolc/dm3	2008-10-21T09:26Z	Cation exchange capacity at pH 7.0	PlotCalais03_/_Cation exchange capacity at pH 7.0 - cmolc/dm3 - Cation exchange capacity at pH 7.0 - Cation exchange capacity at pH 7.0
taxonIdCalais020	Saturation of bases	10.6	Percentage	2008-10-21T09:26Z	Saturation of bases	PlotCalais03_/_Saturation of bases - Percentage - Saturation of bases - Saturation of bases
taxonIdCalais020	Saturation of aluminium	62.9	Percentage	2008-10-21T09:26Z	Saturation of aluminium	PlotCalais03_/_Saturation of aluminium - Percentage - Saturation of aluminium - Saturation of aluminium
taxonIdCalais020	Remaining phosphorus	38.3	mg/L	2008-10-21T09:26Z	Extraction with 0.01 mol/L CaCl2	PlotCalais03_/_Remaining phosphorus - mg/L - Remaining phosphorus - Remaining phosphorus
taxonIdCalais020	Rocky outcrops	25	Percentage	2008-10-21T09:26Z	Estimation	PlotCalais03_/_Rocky outcrops - Percentage - Estimation - Rocky outcrops
taxonIdCalais020	Inclination	20	Percentage	2008-10-21T09:26Z	Estimation	PlotCalais03_/_Inclination - Percentage - Estimation - Inclination
taxonIdCalais022	Coarse sand content	36	Percentage	2008-10-21T09:26Z	sieving	PlotCalais03_/_Coarse sand content - Percentage - sieving - Coarse sand content
taxonIdCalais022	Fine sand content	36	Percentage	2008-10-21T09:26Z	sieving	PlotCalais03_/_Fine sand content - Percentage - sieving - Fine sand content
taxonIdCalais022	Silt content	16	Percentage	2008-10-21T09:26Z	sieving	PlotCalais03_/_Silt content - Percentage - sieving - Silt content
taxonIdCalais022	Clay content	12	Percentage	2008-10-21T09:26Z	sieving	PlotCalais03_/_Clay content - Percentage - sieving - Clay content
taxonIdCalais022	Soil acidity (pH)	5.35	nondimensional	2008-10-21T09:26Z	pH in water	PlotCalais03_/_Soil acidity (pH) - nondimensional - pH in water - Soil acidity (pH)
taxonIdCalais022	Availability of phosphorus	2.2	mg/dm3	2008-10-21T09:26Z	Extrator Mehlich 1	PlotCalais03_/_Availability of phosphorus - mg/dm3 - Extrator Mehlich 1 - Availability of phosphorus
taxonIdCalais022	Potassium availability	34	mg/dm3	2008-10-21T09:26Z	Extrator Mehlich 1	PlotCalais03_/_Potassium availability - mg/dm3 - Extrator Mehlich 1 - Potassium availability
taxonIdCalais022	Calcium availability	0.4	cmolc/dm3	2008-10-21T09:26Z	Extractor KCl 1mol/L	PlotCalais03_/_Calcium availability - cmolc/dm3 - Extractor KCl 1mol/L - Calcium availability
taxonIdCalais022	Magnesium availability	0.14	cmolc/dm3	2008-10-21T09:26Z	Extractor KCl 1mol/L	PlotCalais03_/_Magnesium availability - cmolc/dm3 - Extractor KCl 1mol/L - Magnesium availability
taxonIdCalais022	Aluminium avalaibility	1.07	cmolc/dm3	2008-10-21T09:26Z	Extractor KCl 1mol/L	PlotCalais03_/_Aluminium avalaibility - cmolc/dm3 - Extractor KCl 1mol/L - Aluminium avalaibility
taxonIdCalais022	Potential Acidity (H+AL)	5.3	cmolc/dm3	2008-10-21T09:26Z	Extractor Ca(CH3COO)2, 0.5mol/L, pH 7.0	PlotCalais03_/_Potential acidity (H+Al) - cmolc/dm3 - Extractor Ca(CH3COO)2, 0.5mol/L, pH 7.0 - Potential acidity (H+Al)
taxonIdCalais022	Interchangeable Bases	0.63	cmolc/dm3	2008-10-21T09:26Z	Interchangeable bases	PlotCalais03_/_Interchangeable bases - cmolc/dm3 - Interchangeable bases - Sum of Interchangeable bases
taxonIdCalais022	Effective cation exchange capacity	1.7	cmolc/dm3	2008-10-21T09:26Z	Effective cation exchange capacity	PlotCalais03_/_Effective cation exchange capacity - cmolc/dm3 - Effective cation exchange capacity - Effective cation exchange capacity
taxonIdCalais022	Cation exchange capacity at pH 7.0	5.93	cmolc/dm3	2008-10-21T09:26Z	Cation exchange capacity at pH 7.0	PlotCalais03_/_Cation exchange capacity at pH 7.0 - cmolc/dm3 - Cation exchange capacity at pH 7.0 - Cation exchange capacity at pH 7.0
taxonIdCalais022	Saturation of bases	10.6	Percentage	2008-10-21T09:26Z	Saturation of bases	PlotCalais03_/_Saturation of bases - Percentage - Saturation of bases - Saturation of bases
taxonIdCalais022	Saturation of aluminium	62.9	Percentage	2008-10-21T09:26Z	Saturation of aluminium	PlotCalais03_/_Saturation of aluminium - Percentage - Saturation of aluminium - Saturation of aluminium
taxonIdCalais022	Remaining phosphorus	38.3	mg/L	2008-10-21T09:26Z	Extraction with 0.01 mol/L CaCl2	PlotCalais03_/_Remaining phosphorus - mg/L - Remaining phosphorus - Remaining phosphorus
taxonIdCalais022	Rocky outcrops	25	Percentage	2008-10-21T09:26Z	Estimation	PlotCalais03_/_Rocky outcrops - Percentage - Estimation - Rocky outcrops
taxonIdCalais022	Inclination	20	Percentage	2008-10-21T09:26Z	Estimation	PlotCalais03_/_Inclination - Percentage - Estimation - Inclination
taxonIdCalais025	Coarse sand content	36	Percentage	2008-10-21T09:26Z	sieving	PlotCalais03_/_Coarse sand content - Percentage - sieving - Coarse sand content
taxonIdCalais025	Fine sand content	36	Percentage	2008-10-21T09:26Z	sieving	PlotCalais03_/_Fine sand content - Percentage - sieving - Fine sand content
taxonIdCalais025	Silt content	16	Percentage	2008-10-21T09:26Z	sieving	PlotCalais03_/_Silt content - Percentage - sieving - Silt content
taxonIdCalais025	Clay content	12	Percentage	2008-10-21T09:26Z	sieving	PlotCalais03_/_Clay content - Percentage - sieving - Clay content
taxonIdCalais025	Soil acidity (pH)	5.35	nondimensional	2008-10-21T09:26Z	pH in water	PlotCalais03_/_Soil acidity (pH) - nondimensional - pH in water - Soil acidity (pH)
taxonIdCalais025	Availability of phosphorus	2.2	mg/dm3	2008-10-21T09:26Z	Extrator Mehlich 1	PlotCalais03_/_Availability of phosphorus - mg/dm3 - Extrator Mehlich 1 - Availability of phosphorus
taxonIdCalais025	Potassium availability	34	mg/dm3	2008-10-21T09:26Z	Extrator Mehlich 1	PlotCalais03_/_Potassium availability - mg/dm3 - Extrator Mehlich 1 - Potassium availability
taxonIdCalais025	Calcium availability	0.4	cmolc/dm3	2008-10-21T09:26Z	Extractor KCl 1mol/L	PlotCalais03_/_Calcium availability - cmolc/dm3 - Extractor KCl 1mol/L - Calcium availability
taxonIdCalais025	Magnesium availability	0.14	cmolc/dm3	2008-10-21T09:26Z	Extractor KCl 1mol/L	PlotCalais03_/_Magnesium availability - cmolc/dm3 - Extractor KCl 1mol/L - Magnesium availability
taxonIdCalais025	Aluminium avalaibility	1.07	cmolc/dm3	2008-10-21T09:26Z	Extractor KCl 1mol/L	PlotCalais03_/_Aluminium avalaibility - cmolc/dm3 - Extractor KCl 1mol/L - Aluminium avalaibility
taxonIdCalais025	Potential Acidity (H+AL)	5.3	cmolc/dm3	2008-10-21T09:26Z	Extractor Ca(CH3COO)2, 0.5mol/L, pH 7.0	PlotCalais03_/_Potential acidity (H+Al) - cmolc/dm3 - Extractor Ca(CH3COO)2, 0.5mol/L, pH 7.0 - Potential acidity (H+Al)
taxonIdCalais025	Interchangeable Bases	0.63	cmolc/dm3	2008-10-21T09:26Z	Interchangeable bases	PlotCalais03_/_Interchangeable bases - cmolc/dm3 - Interchangeable bases - Sum of Interchangeable bases
taxonIdCalais025	Effective cation exchange capacity	1.7	cmolc/dm3	2008-10-21T09:26Z	Effective cation exchange capacity	PlotCalais03_/_Effective cation exchange capacity - cmolc/dm3 - Effective cation exchange capacity - Effective cation exchange capacity
taxonIdCalais025	Cation exchange capacity at pH 7.0	5.93	cmolc/dm3	2008-10-21T09:26Z	Cation exchange capacity at pH 7.0	PlotCalais03_/_Cation exchange capacity at pH 7.0 - cmolc/dm3 - Cation exchange capacity at pH 7.0 - Cation exchange capacity at pH 7.0
taxonIdCalais025	Saturation of bases	10.6	Percentage	2008-10-21T09:26Z	Saturation of bases	PlotCalais03_/_Saturation of bases - Percentage - Saturation of bases - Saturation of bases
taxonIdCalais025	Saturation of aluminium	62.9	Percentage	2008-10-21T09:26Z	Saturation of aluminium	PlotCalais03_/_Saturation of aluminium - Percentage - Saturation of aluminium - Saturation of aluminium
taxonIdCalais025	Remaining phosphorus	38.3	mg/L	2008-10-21T09:26Z	Extraction with 0.01 mol/L CaCl2	PlotCalais03_/_Remaining phosphorus - mg/L - Remaining phosphorus - Remaining phosphorus
taxonIdCalais025	Rocky outcrops	25	Percentage	2008-10-21T09:26Z	Estimation	PlotCalais03_/_Rocky outcrops - Percentage - Estimation - Rocky outcrops
taxonIdCalais025	Inclination	20	Percentage	2008-10-21T09:26Z	Estimation	PlotCalais03_/_Inclination - Percentage - Estimation - Inclination
taxonIdCalais026	Coarse sand content	36	Percentage	2008-10-21T09:26Z	sieving	PlotCalais03_/_Coarse sand content - Percentage - sieving - Coarse sand content
taxonIdCalais026	Fine sand content	36	Percentage	2008-10-21T09:26Z	sieving	PlotCalais03_/_Fine sand content - Percentage - sieving - Fine sand content
taxonIdCalais026	Silt content	16	Percentage	2008-10-21T09:26Z	sieving	PlotCalais03_/_Silt content - Percentage - sieving - Silt content
taxonIdCalais026	Clay content	12	Percentage	2008-10-21T09:26Z	sieving	PlotCalais03_/_Clay content - Percentage - sieving - Clay content
taxonIdCalais026	Soil acidity (pH)	5.35	nondimensional	2008-10-21T09:26Z	pH in water	PlotCalais03_/_Soil acidity (pH) - nondimensional - pH in water - Soil acidity (pH)
taxonIdCalais026	Availability of phosphorus	2.2	mg/dm3	2008-10-21T09:26Z	Extrator Mehlich 1	PlotCalais03_/_Availability of phosphorus - mg/dm3 - Extrator Mehlich 1 - Availability of phosphorus
taxonIdCalais026	Potassium availability	34	mg/dm3	2008-10-21T09:26Z	Extrator Mehlich 1	PlotCalais03_/_Potassium availability - mg/dm3 - Extrator Mehlich 1 - Potassium availability
taxonIdCalais026	Calcium availability	0.4	cmolc/dm3	2008-10-21T09:26Z	Extractor KCl 1mol/L	PlotCalais03_/_Calcium availability - cmolc/dm3 - Extractor KCl 1mol/L - Calcium availability
taxonIdCalais026	Magnesium availability	0.14	cmolc/dm3	2008-10-21T09:26Z	Extractor KCl 1mol/L	PlotCalais03_/_Magnesium availability - cmolc/dm3 - Extractor KCl 1mol/L - Magnesium availability
taxonIdCalais026	Aluminium avalaibility	1.07	cmolc/dm3	2008-10-21T09:26Z	Extractor KCl 1mol/L	PlotCalais03_/_Aluminium avalaibility - cmolc/dm3 - Extractor KCl 1mol/L - Aluminium avalaibility
taxonIdCalais026	Potential Acidity (H+AL)	5.3	cmolc/dm3	2008-10-21T09:26Z	Extractor Ca(CH3COO)2, 0.5mol/L, pH 7.0	PlotCalais03_/_Potential acidity (H+Al) - cmolc/dm3 - Extractor Ca(CH3COO)2, 0.5mol/L, pH 7.0 - Potential acidity (H+Al)
taxonIdCalais026	Interchangeable Bases	0.63	cmolc/dm3	2008-10-21T09:26Z	Interchangeable bases	PlotCalais03_/_Interchangeable bases - cmolc/dm3 - Interchangeable bases - Sum of Interchangeable bases
taxonIdCalais026	Effective cation exchange capacity	1.7	cmolc/dm3	2008-10-21T09:26Z	Effective cation exchange capacity	PlotCalais03_/_Effective cation exchange capacity - cmolc/dm3 - Effective cation exchange capacity - Effective cation exchange capacity
taxonIdCalais026	Cation exchange capacity at pH 7.0	5.93	cmolc/dm3	2008-10-21T09:26Z	Cation exchange capacity at pH 7.0	PlotCalais03_/_Cation exchange capacity at pH 7.0 - cmolc/dm3 - Cation exchange capacity at pH 7.0 - Cation exchange capacity at pH 7.0
taxonIdCalais026	Saturation of bases	10.6	Percentage	2008-10-21T09:26Z	Saturation of bases	PlotCalais03_/_Saturation of bases - Percentage - Saturation of bases - Saturation of bases
taxonIdCalais026	Saturation of aluminium	62.9	Percentage	2008-10-21T09:26Z	Saturation of aluminium	PlotCalais03_/_Saturation of aluminium - Percentage - Saturation of aluminium - Saturation of aluminium
taxonIdCalais026	Remaining phosphorus	38.3	mg/L	2008-10-21T09:26Z	Extraction with 0.01 mol/L CaCl2	PlotCalais03_/_Remaining phosphorus - mg/L - Remaining phosphorus - Remaining phosphorus
taxonIdCalais026	Rocky outcrops	25	Percentage	2008-10-21T09:26Z	Estimation	PlotCalais03_/_Rocky outcrops - Percentage - Estimation - Rocky outcrops
taxonIdCalais026	Inclination	20	Percentage	2008-10-21T09:26Z	Estimation	PlotCalais03_/_Inclination - Percentage - Estimation - Inclination
taxonIdCalais028	Coarse sand content	36	Percentage	2008-10-21T09:26Z	sieving	PlotCalais03_/_Coarse sand content - Percentage - sieving - Coarse sand content
taxonIdCalais028	Fine sand content	36	Percentage	2008-10-21T09:26Z	sieving	PlotCalais03_/_Fine sand content - Percentage - sieving - Fine sand content
taxonIdCalais028	Silt content	16	Percentage	2008-10-21T09:26Z	sieving	PlotCalais03_/_Silt content - Percentage - sieving - Silt content
taxonIdCalais028	Clay content	12	Percentage	2008-10-21T09:26Z	sieving	PlotCalais03_/_Clay content - Percentage - sieving - Clay content
taxonIdCalais028	Soil acidity (pH)	5.35	nondimensional	2008-10-21T09:26Z	pH in water	PlotCalais03_/_Soil acidity (pH) - nondimensional - pH in water - Soil acidity (pH)
taxonIdCalais028	Availability of phosphorus	2.2	mg/dm3	2008-10-21T09:26Z	Extrator Mehlich 1	PlotCalais03_/_Availability of phosphorus - mg/dm3 - Extrator Mehlich 1 - Availability of phosphorus
taxonIdCalais028	Potassium availability	34	mg/dm3	2008-10-21T09:26Z	Extrator Mehlich 1	PlotCalais03_/_Potassium availability - mg/dm3 - Extrator Mehlich 1 - Potassium availability
taxonIdCalais028	Calcium availability	0.4	cmolc/dm3	2008-10-21T09:26Z	Extractor KCl 1mol/L	PlotCalais03_/_Calcium availability - cmolc/dm3 - Extractor KCl 1mol/L - Calcium availability
taxonIdCalais028	Magnesium availability	0.14	cmolc/dm3	2008-10-21T09:26Z	Extractor KCl 1mol/L	PlotCalais03_/_Magnesium availability - cmolc/dm3 - Extractor KCl 1mol/L - Magnesium availability
taxonIdCalais028	Aluminium avalaibility	1.07	cmolc/dm3	2008-10-21T09:26Z	Extractor KCl 1mol/L	PlotCalais03_/_Aluminium avalaibility - cmolc/dm3 - Extractor KCl 1mol/L - Aluminium avalaibility
taxonIdCalais028	Potential Acidity (H+AL)	5.3	cmolc/dm3	2008-10-21T09:26Z	Extractor Ca(CH3COO)2, 0.5mol/L, pH 7.0	PlotCalais03_/_Potential acidity (H+Al) - cmolc/dm3 - Extractor Ca(CH3COO)2, 0.5mol/L, pH 7.0 - Potential acidity (H+Al)
taxonIdCalais028	Interchangeable Bases	0.63	cmolc/dm3	2008-10-21T09:26Z	Interchangeable bases	PlotCalais03_/_Interchangeable bases - cmolc/dm3 - Interchangeable bases - Sum of Interchangeable bases
taxonIdCalais028	Effective cation exchange capacity	1.7	cmolc/dm3	2008-10-21T09:26Z	Effective cation exchange capacity	PlotCalais03_/_Effective cation exchange capacity - cmolc/dm3 - Effective cation exchange capacity - Effective cation exchange capacity
taxonIdCalais028	Cation exchange capacity at pH 7.0	5.93	cmolc/dm3	2008-10-21T09:26Z	Cation exchange capacity at pH 7.0	PlotCalais03_/_Cation exchange capacity at pH 7.0 - cmolc/dm3 - Cation exchange capacity at pH 7.0 - Cation exchange capacity at pH 7.0
taxonIdCalais028	Saturation of bases	10.6	Percentage	2008-10-21T09:26Z	Saturation of bases	PlotCalais03_/_Saturation of bases - Percentage - Saturation of bases - Saturation of bases
taxonIdCalais028	Saturation of aluminium	62.9	Percentage	2008-10-21T09:26Z	Saturation of aluminium	PlotCalais03_/_Saturation of aluminium - Percentage - Saturation of aluminium - Saturation of aluminium
taxonIdCalais028	Remaining phosphorus	38.3	mg/L	2008-10-21T09:26Z	Extraction with 0.01 mol/L CaCl2	PlotCalais03_/_Remaining phosphorus - mg/L - Remaining phosphorus - Remaining phosphorus
taxonIdCalais028	Rocky outcrops	25	Percentage	2008-10-21T09:26Z	Estimation	PlotCalais03_/_Rocky outcrops - Percentage - Estimation - Rocky outcrops
taxonIdCalais028	Inclination	20	Percentage	2008-10-21T09:26Z	Estimation	PlotCalais03_/_Inclination - Percentage - Estimation - Inclination
taxonIdCalais030	Coarse sand content	36	Percentage	2008-10-21T09:26Z	sieving	PlotCalais03_/_Coarse sand content - Percentage - sieving - Coarse sand content
taxonIdCalais030	Fine sand content	36	Percentage	2008-10-21T09:26Z	sieving	PlotCalais03_/_Fine sand content - Percentage - sieving - Fine sand content
taxonIdCalais030	Silt content	16	Percentage	2008-10-21T09:26Z	sieving	PlotCalais03_/_Silt content - Percentage - sieving - Silt content
taxonIdCalais030	Clay content	12	Percentage	2008-10-21T09:26Z	sieving	PlotCalais03_/_Clay content - Percentage - sieving - Clay content
taxonIdCalais030	Soil acidity (pH)	5.35	nondimensional	2008-10-21T09:26Z	pH in water	PlotCalais03_/_Soil acidity (pH) - nondimensional - pH in water - Soil acidity (pH)
taxonIdCalais030	Availability of phosphorus	2.2	mg/dm3	2008-10-21T09:26Z	Extrator Mehlich 1	PlotCalais03_/_Availability of phosphorus - mg/dm3 - Extrator Mehlich 1 - Availability of phosphorus
taxonIdCalais030	Potassium availability	34	mg/dm3	2008-10-21T09:26Z	Extrator Mehlich 1	PlotCalais03_/_Potassium availability - mg/dm3 - Extrator Mehlich 1 - Potassium availability
taxonIdCalais030	Calcium availability	0.4	cmolc/dm3	2008-10-21T09:26Z	Extractor KCl 1mol/L	PlotCalais03_/_Calcium availability - cmolc/dm3 - Extractor KCl 1mol/L - Calcium availability
taxonIdCalais030	Magnesium availability	0.14	cmolc/dm3	2008-10-21T09:26Z	Extractor KCl 1mol/L	PlotCalais03_/_Magnesium availability - cmolc/dm3 - Extractor KCl 1mol/L - Magnesium availability
taxonIdCalais030	Aluminium avalaibility	1.07	cmolc/dm3	2008-10-21T09:26Z	Extractor KCl 1mol/L	PlotCalais03_/_Aluminium avalaibility - cmolc/dm3 - Extractor KCl 1mol/L - Aluminium avalaibility
taxonIdCalais030	Potential Acidity (H+AL)	5.3	cmolc/dm3	2008-10-21T09:26Z	Extractor Ca(CH3COO)2, 0.5mol/L, pH 7.0	PlotCalais03_/_Potential acidity (H+Al) - cmolc/dm3 - Extractor Ca(CH3COO)2, 0.5mol/L, pH 7.0 - Potential acidity (H+Al)
taxonIdCalais030	Interchangeable Bases	0.63	cmolc/dm3	2008-10-21T09:26Z	Interchangeable bases	PlotCalais03_/_Interchangeable bases - cmolc/dm3 - Interchangeable bases - Sum of Interchangeable bases
taxonIdCalais030	Effective cation exchange capacity	1.7	cmolc/dm3	2008-10-21T09:26Z	Effective cation exchange capacity	PlotCalais03_/_Effective cation exchange capacity - cmolc/dm3 - Effective cation exchange capacity - Effective cation exchange capacity
taxonIdCalais030	Cation exchange capacity at pH 7.0	5.93	cmolc/dm3	2008-10-21T09:26Z	Cation exchange capacity at pH 7.0	PlotCalais03_/_Cation exchange capacity at pH 7.0 - cmolc/dm3 - Cation exchange capacity at pH 7.0 - Cation exchange capacity at pH 7.0
taxonIdCalais030	Saturation of bases	10.6	Percentage	2008-10-21T09:26Z	Saturation of bases	PlotCalais03_/_Saturation of bases - Percentage - Saturation of bases - Saturation of bases
taxonIdCalais030	Saturation of aluminium	62.9	Percentage	2008-10-21T09:26Z	Saturation of aluminium	PlotCalais03_/_Saturation of aluminium - Percentage - Saturation of aluminium - Saturation of aluminium
taxonIdCalais030	Remaining phosphorus	38.3	mg/L	2008-10-21T09:26Z	Extraction with 0.01 mol/L CaCl2	PlotCalais03_/_Remaining phosphorus - mg/L - Remaining phosphorus - Remaining phosphorus
taxonIdCalais030	Rocky outcrops	25	Percentage	2008-10-21T09:26Z	Estimation	PlotCalais03_/_Rocky outcrops - Percentage - Estimation - Rocky outcrops
taxonIdCalais030	Inclination	20	Percentage	2008-10-21T09:26Z	Estimation	PlotCalais03_/_Inclination - Percentage - Estimation - Inclination
taxonIdCalais031	Coarse sand content	36	Percentage	2008-10-21T09:26Z	sieving	PlotCalais03_/_Coarse sand content - Percentage - sieving - Coarse sand content
taxonIdCalais031	Fine sand content	36	Percentage	2008-10-21T09:26Z	sieving	PlotCalais03_/_Fine sand content - Percentage - sieving - Fine sand content
taxonIdCalais031	Silt content	16	Percentage	2008-10-21T09:26Z	sieving	PlotCalais03_/_Silt content - Percentage - sieving - Silt content
taxonIdCalais031	Clay content	12	Percentage	2008-10-21T09:26Z	sieving	PlotCalais03_/_Clay content - Percentage - sieving - Clay content
taxonIdCalais031	Soil acidity (pH)	5.35	nondimensional	2008-10-21T09:26Z	pH in water	PlotCalais03_/_Soil acidity (pH) - nondimensional - pH in water - Soil acidity (pH)
taxonIdCalais031	Availability of phosphorus	2.2	mg/dm3	2008-10-21T09:26Z	Extrator Mehlich 1	PlotCalais03_/_Availability of phosphorus - mg/dm3 - Extrator Mehlich 1 - Availability of phosphorus
taxonIdCalais031	Potassium availability	34	mg/dm3	2008-10-21T09:26Z	Extrator Mehlich 1	PlotCalais03_/_Potassium availability - mg/dm3 - Extrator Mehlich 1 - Potassium availability
taxonIdCalais031	Calcium availability	0.4	cmolc/dm3	2008-10-21T09:26Z	Extractor KCl 1mol/L	PlotCalais03_/_Calcium availability - cmolc/dm3 - Extractor KCl 1mol/L - Calcium availability
taxonIdCalais031	Magnesium availability	0.14	cmolc/dm3	2008-10-21T09:26Z	Extractor KCl 1mol/L	PlotCalais03_/_Magnesium availability - cmolc/dm3 - Extractor KCl 1mol/L - Magnesium availability
taxonIdCalais031	Aluminium avalaibility	1.07	cmolc/dm3	2008-10-21T09:26Z	Extractor KCl 1mol/L	PlotCalais03_/_Aluminium avalaibility - cmolc/dm3 - Extractor KCl 1mol/L - Aluminium avalaibility
taxonIdCalais031	Potential Acidity (H+AL)	5.3	cmolc/dm3	2008-10-21T09:26Z	Extractor Ca(CH3COO)2, 0.5mol/L, pH 7.0	PlotCalais03_/_Potential acidity (H+Al) - cmolc/dm3 - Extractor Ca(CH3COO)2, 0.5mol/L, pH 7.0 - Potential acidity (H+Al)
taxonIdCalais031	Interchangeable Bases	0.63	cmolc/dm3	2008-10-21T09:26Z	Interchangeable bases	PlotCalais03_/_Interchangeable bases - cmolc/dm3 - Interchangeable bases - Sum of Interchangeable bases
taxonIdCalais031	Effective cation exchange capacity	1.7	cmolc/dm3	2008-10-21T09:26Z	Effective cation exchange capacity	PlotCalais03_/_Effective cation exchange capacity - cmolc/dm3 - Effective cation exchange capacity - Effective cation exchange capacity
taxonIdCalais031	Cation exchange capacity at pH 7.0	5.93	cmolc/dm3	2008-10-21T09:26Z	Cation exchange capacity at pH 7.0	PlotCalais03_/_Cation exchange capacity at pH 7.0 - cmolc/dm3 - Cation exchange capacity at pH 7.0 - Cation exchange capacity at pH 7.0
taxonIdCalais031	Saturation of bases	10.6	Percentage	2008-10-21T09:26Z	Saturation of bases	PlotCalais03_/_Saturation of bases - Percentage - Saturation of bases - Saturation of bases
taxonIdCalais031	Saturation of aluminium	62.9	Percentage	2008-10-21T09:26Z	Saturation of aluminium	PlotCalais03_/_Saturation of aluminium - Percentage - Saturation of aluminium - Saturation of aluminium
taxonIdCalais031	Remaining phosphorus	38.3	mg/L	2008-10-21T09:26Z	Extraction with 0.01 mol/L CaCl2	PlotCalais03_/_Remaining phosphorus - mg/L - Remaining phosphorus - Remaining phosphorus
taxonIdCalais031	Rocky outcrops	25	Percentage	2008-10-21T09:26Z	Estimation	PlotCalais03_/_Rocky outcrops - Percentage - Estimation - Rocky outcrops
taxonIdCalais031	Inclination	20	Percentage	2008-10-21T09:26Z	Estimation	PlotCalais03_/_Inclination - Percentage - Estimation - Inclination
taxonIdCalais039	Coarse sand content	36	Percentage	2008-10-21T09:26Z	sieving	PlotCalais03_/_Coarse sand content - Percentage - sieving - Coarse sand content
taxonIdCalais039	Fine sand content	36	Percentage	2008-10-21T09:26Z	sieving	PlotCalais03_/_Fine sand content - Percentage - sieving - Fine sand content
taxonIdCalais039	Silt content	16	Percentage	2008-10-21T09:26Z	sieving	PlotCalais03_/_Silt content - Percentage - sieving - Silt content
taxonIdCalais039	Clay content	12	Percentage	2008-10-21T09:26Z	sieving	PlotCalais03_/_Clay content - Percentage - sieving - Clay content
taxonIdCalais039	Soil acidity (pH)	5.35	nondimensional	2008-10-21T09:26Z	pH in water	PlotCalais03_/_Soil acidity (pH) - nondimensional - pH in water - Soil acidity (pH)
taxonIdCalais039	Availability of phosphorus	2.2	mg/dm3	2008-10-21T09:26Z	Extrator Mehlich 1	PlotCalais03_/_Availability of phosphorus - mg/dm3 - Extrator Mehlich 1 - Availability of phosphorus
taxonIdCalais039	Potassium availability	34	mg/dm3	2008-10-21T09:26Z	Extrator Mehlich 1	PlotCalais03_/_Potassium availability - mg/dm3 - Extrator Mehlich 1 - Potassium availability
taxonIdCalais039	Calcium availability	0.4	cmolc/dm3	2008-10-21T09:26Z	Extractor KCl 1mol/L	PlotCalais03_/_Calcium availability - cmolc/dm3 - Extractor KCl 1mol/L - Calcium availability
taxonIdCalais039	Magnesium availability	0.14	cmolc/dm3	2008-10-21T09:26Z	Extractor KCl 1mol/L	PlotCalais03_/_Magnesium availability - cmolc/dm3 - Extractor KCl 1mol/L - Magnesium availability
taxonIdCalais039	Aluminium avalaibility	1.07	cmolc/dm3	2008-10-21T09:26Z	Extractor KCl 1mol/L	PlotCalais03_/_Aluminium avalaibility - cmolc/dm3 - Extractor KCl 1mol/L - Aluminium avalaibility
taxonIdCalais039	Potential Acidity (H+AL)	5.3	cmolc/dm3	2008-10-21T09:26Z	Extractor Ca(CH3COO)2, 0.5mol/L, pH 7.0	PlotCalais03_/_Potential acidity (H+Al) - cmolc/dm3 - Extractor Ca(CH3COO)2, 0.5mol/L, pH 7.0 - Potential acidity (H+Al)
taxonIdCalais039	Interchangeable Bases	0.63	cmolc/dm3	2008-10-21T09:26Z	Interchangeable bases	PlotCalais03_/_Interchangeable bases - cmolc/dm3 - Interchangeable bases - Sum of Interchangeable bases
taxonIdCalais039	Effective cation exchange capacity	1.7	cmolc/dm3	2008-10-21T09:26Z	Effective cation exchange capacity	PlotCalais03_/_Effective cation exchange capacity - cmolc/dm3 - Effective cation exchange capacity - Effective cation exchange capacity
taxonIdCalais039	Cation exchange capacity at pH 7.0	5.93	cmolc/dm3	2008-10-21T09:26Z	Cation exchange capacity at pH 7.0	PlotCalais03_/_Cation exchange capacity at pH 7.0 - cmolc/dm3 - Cation exchange capacity at pH 7.0 - Cation exchange capacity at pH 7.0
taxonIdCalais039	Saturation of bases	10.6	Percentage	2008-10-21T09:26Z	Saturation of bases	PlotCalais03_/_Saturation of bases - Percentage - Saturation of bases - Saturation of bases
taxonIdCalais039	Saturation of aluminium	62.9	Percentage	2008-10-21T09:26Z	Saturation of aluminium	PlotCalais03_/_Saturation of aluminium - Percentage - Saturation of aluminium - Saturation of aluminium
taxonIdCalais039	Remaining phosphorus	38.3	mg/L	2008-10-21T09:26Z	Extraction with 0.01 mol/L CaCl2	PlotCalais03_/_Remaining phosphorus - mg/L - Remaining phosphorus - Remaining phosphorus
taxonIdCalais039	Rocky outcrops	25	Percentage	2008-10-21T09:26Z	Estimation	PlotCalais03_/_Rocky outcrops - Percentage - Estimation - Rocky outcrops
taxonIdCalais039	Inclination	20	Percentage	2008-10-21T09:26Z	Estimation	PlotCalais03_/_Inclination - Percentage - Estimation - Inclination
taxonIdCalais042	Coarse sand content	36	Percentage	2008-10-21T09:26Z	sieving	PlotCalais03_/_Coarse sand content - Percentage - sieving - Coarse sand content
taxonIdCalais042	Fine sand content	36	Percentage	2008-10-21T09:26Z	sieving	PlotCalais03_/_Fine sand content - Percentage - sieving - Fine sand content
taxonIdCalais042	Silt content	16	Percentage	2008-10-21T09:26Z	sieving	PlotCalais03_/_Silt content - Percentage - sieving - Silt content
taxonIdCalais042	Clay content	12	Percentage	2008-10-21T09:26Z	sieving	PlotCalais03_/_Clay content - Percentage - sieving - Clay content
taxonIdCalais042	Soil acidity (pH)	5.35	nondimensional	2008-10-21T09:26Z	pH in water	PlotCalais03_/_Soil acidity (pH) - nondimensional - pH in water - Soil acidity (pH)
taxonIdCalais042	Availability of phosphorus	2.2	mg/dm3	2008-10-21T09:26Z	Extrator Mehlich 1	PlotCalais03_/_Availability of phosphorus - mg/dm3 - Extrator Mehlich 1 - Availability of phosphorus
taxonIdCalais042	Potassium availability	34	mg/dm3	2008-10-21T09:26Z	Extrator Mehlich 1	PlotCalais03_/_Potassium availability - mg/dm3 - Extrator Mehlich 1 - Potassium availability
taxonIdCalais042	Calcium availability	0.4	cmolc/dm3	2008-10-21T09:26Z	Extractor KCl 1mol/L	PlotCalais03_/_Calcium availability - cmolc/dm3 - Extractor KCl 1mol/L - Calcium availability
taxonIdCalais042	Magnesium availability	0.14	cmolc/dm3	2008-10-21T09:26Z	Extractor KCl 1mol/L	PlotCalais03_/_Magnesium availability - cmolc/dm3 - Extractor KCl 1mol/L - Magnesium availability
taxonIdCalais042	Aluminium avalaibility	1.07	cmolc/dm3	2008-10-21T09:26Z	Extractor KCl 1mol/L	PlotCalais03_/_Aluminium avalaibility - cmolc/dm3 - Extractor KCl 1mol/L - Aluminium avalaibility
taxonIdCalais042	Potential Acidity (H+AL)	5.3	cmolc/dm3	2008-10-21T09:26Z	Extractor Ca(CH3COO)2, 0.5mol/L, pH 7.0	PlotCalais03_/_Potential acidity (H+Al) - cmolc/dm3 - Extractor Ca(CH3COO)2, 0.5mol/L, pH 7.0 - Potential acidity (H+Al)
taxonIdCalais042	Interchangeable Bases	0.63	cmolc/dm3	2008-10-21T09:26Z	Interchangeable bases	PlotCalais03_/_Interchangeable bases - cmolc/dm3 - Interchangeable bases - Sum of Interchangeable bases
taxonIdCalais042	Effective cation exchange capacity	1.7	cmolc/dm3	2008-10-21T09:26Z	Effective cation exchange capacity	PlotCalais03_/_Effective cation exchange capacity - cmolc/dm3 - Effective cation exchange capacity - Effective cation exchange capacity
taxonIdCalais042	Cation exchange capacity at pH 7.0	5.93	cmolc/dm3	2008-10-21T09:26Z	Cation exchange capacity at pH 7.0	PlotCalais03_/_Cation exchange capacity at pH 7.0 - cmolc/dm3 - Cation exchange capacity at pH 7.0 - Cation exchange capacity at pH 7.0
taxonIdCalais042	Saturation of bases	10.6	Percentage	2008-10-21T09:26Z	Saturation of bases	PlotCalais03_/_Saturation of bases - Percentage - Saturation of bases - Saturation of bases
taxonIdCalais042	Saturation of aluminium	62.9	Percentage	2008-10-21T09:26Z	Saturation of aluminium	PlotCalais03_/_Saturation of aluminium - Percentage - Saturation of aluminium - Saturation of aluminium
taxonIdCalais042	Remaining phosphorus	38.3	mg/L	2008-10-21T09:26Z	Extraction with 0.01 mol/L CaCl2	PlotCalais03_/_Remaining phosphorus - mg/L - Remaining phosphorus - Remaining phosphorus
taxonIdCalais042	Rocky outcrops	25	Percentage	2008-10-21T09:26Z	Estimation	PlotCalais03_/_Rocky outcrops - Percentage - Estimation - Rocky outcrops
taxonIdCalais042	Inclination	20	Percentage	2008-10-21T09:26Z	Estimation	PlotCalais03_/_Inclination - Percentage - Estimation - Inclination
taxonIdCalais043	Coarse sand content	36	Percentage	2008-10-21T09:26Z	sieving	PlotCalais03_/_Coarse sand content - Percentage - sieving - Coarse sand content
taxonIdCalais043	Fine sand content	36	Percentage	2008-10-21T09:26Z	sieving	PlotCalais03_/_Fine sand content - Percentage - sieving - Fine sand content
taxonIdCalais043	Silt content	16	Percentage	2008-10-21T09:26Z	sieving	PlotCalais03_/_Silt content - Percentage - sieving - Silt content
taxonIdCalais043	Clay content	12	Percentage	2008-10-21T09:26Z	sieving	PlotCalais03_/_Clay content - Percentage - sieving - Clay content
taxonIdCalais043	Soil acidity (pH)	5.35	nondimensional	2008-10-21T09:26Z	pH in water	PlotCalais03_/_Soil acidity (pH) - nondimensional - pH in water - Soil acidity (pH)
taxonIdCalais043	Availability of phosphorus	2.2	mg/dm3	2008-10-21T09:26Z	Extrator Mehlich 1	PlotCalais03_/_Availability of phosphorus - mg/dm3 - Extrator Mehlich 1 - Availability of phosphorus
taxonIdCalais043	Potassium availability	34	mg/dm3	2008-10-21T09:26Z	Extrator Mehlich 1	PlotCalais03_/_Potassium availability - mg/dm3 - Extrator Mehlich 1 - Potassium availability
taxonIdCalais043	Calcium availability	0.4	cmolc/dm3	2008-10-21T09:26Z	Extractor KCl 1mol/L	PlotCalais03_/_Calcium availability - cmolc/dm3 - Extractor KCl 1mol/L - Calcium availability
taxonIdCalais043	Magnesium availability	0.14	cmolc/dm3	2008-10-21T09:26Z	Extractor KCl 1mol/L	PlotCalais03_/_Magnesium availability - cmolc/dm3 - Extractor KCl 1mol/L - Magnesium availability
taxonIdCalais043	Aluminium avalaibility	1.07	cmolc/dm3	2008-10-21T09:26Z	Extractor KCl 1mol/L	PlotCalais03_/_Aluminium avalaibility - cmolc/dm3 - Extractor KCl 1mol/L - Aluminium avalaibility
taxonIdCalais043	Potential Acidity (H+AL)	5.3	cmolc/dm3	2008-10-21T09:26Z	Extractor Ca(CH3COO)2, 0.5mol/L, pH 7.0	PlotCalais03_/_Potential acidity (H+Al) - cmolc/dm3 - Extractor Ca(CH3COO)2, 0.5mol/L, pH 7.0 - Potential acidity (H+Al)
taxonIdCalais043	Interchangeable Bases	0.63	cmolc/dm3	2008-10-21T09:26Z	Interchangeable bases	PlotCalais03_/_Interchangeable bases - cmolc/dm3 - Interchangeable bases - Sum of Interchangeable bases
taxonIdCalais043	Effective cation exchange capacity	1.7	cmolc/dm3	2008-10-21T09:26Z	Effective cation exchange capacity	PlotCalais03_/_Effective cation exchange capacity - cmolc/dm3 - Effective cation exchange capacity - Effective cation exchange capacity
taxonIdCalais043	Cation exchange capacity at pH 7.0	5.93	cmolc/dm3	2008-10-21T09:26Z	Cation exchange capacity at pH 7.0	PlotCalais03_/_Cation exchange capacity at pH 7.0 - cmolc/dm3 - Cation exchange capacity at pH 7.0 - Cation exchange capacity at pH 7.0
taxonIdCalais043	Saturation of bases	10.6	Percentage	2008-10-21T09:26Z	Saturation of bases	PlotCalais03_/_Saturation of bases - Percentage - Saturation of bases - Saturation of bases
taxonIdCalais043	Saturation of aluminium	62.9	Percentage	2008-10-21T09:26Z	Saturation of aluminium	PlotCalais03_/_Saturation of aluminium - Percentage - Saturation of aluminium - Saturation of aluminium
taxonIdCalais043	Remaining phosphorus	38.3	mg/L	2008-10-21T09:26Z	Extraction with 0.01 mol/L CaCl2	PlotCalais03_/_Remaining phosphorus - mg/L - Remaining phosphorus - Remaining phosphorus
taxonIdCalais043	Rocky outcrops	25	Percentage	2008-10-21T09:26Z	Estimation	PlotCalais03_/_Rocky outcrops - Percentage - Estimation - Rocky outcrops
taxonIdCalais043	Inclination	20	Percentage	2008-10-21T09:26Z	Estimation	PlotCalais03_/_Inclination - Percentage - Estimation - Inclination
taxonIdCalais044	Coarse sand content	36	Percentage	2008-10-21T09:26Z	sieving	PlotCalais03_/_Coarse sand content - Percentage - sieving - Coarse sand content
taxonIdCalais044	Fine sand content	36	Percentage	2008-10-21T09:26Z	sieving	PlotCalais03_/_Fine sand content - Percentage - sieving - Fine sand content
taxonIdCalais044	Silt content	16	Percentage	2008-10-21T09:26Z	sieving	PlotCalais03_/_Silt content - Percentage - sieving - Silt content
taxonIdCalais044	Clay content	12	Percentage	2008-10-21T09:26Z	sieving	PlotCalais03_/_Clay content - Percentage - sieving - Clay content
taxonIdCalais044	Soil acidity (pH)	5.35	nondimensional	2008-10-21T09:26Z	pH in water	PlotCalais03_/_Soil acidity (pH) - nondimensional - pH in water - Soil acidity (pH)
taxonIdCalais044	Availability of phosphorus	2.2	mg/dm3	2008-10-21T09:26Z	Extrator Mehlich 1	PlotCalais03_/_Availability of phosphorus - mg/dm3 - Extrator Mehlich 1 - Availability of phosphorus
taxonIdCalais044	Potassium availability	34	mg/dm3	2008-10-21T09:26Z	Extrator Mehlich 1	PlotCalais03_/_Potassium availability - mg/dm3 - Extrator Mehlich 1 - Potassium availability
taxonIdCalais044	Calcium availability	0.4	cmolc/dm3	2008-10-21T09:26Z	Extractor KCl 1mol/L	PlotCalais03_/_Calcium availability - cmolc/dm3 - Extractor KCl 1mol/L - Calcium availability
taxonIdCalais044	Magnesium availability	0.14	cmolc/dm3	2008-10-21T09:26Z	Extractor KCl 1mol/L	PlotCalais03_/_Magnesium availability - cmolc/dm3 - Extractor KCl 1mol/L - Magnesium availability
taxonIdCalais044	Aluminium avalaibility	1.07	cmolc/dm3	2008-10-21T09:26Z	Extractor KCl 1mol/L	PlotCalais03_/_Aluminium avalaibility - cmolc/dm3 - Extractor KCl 1mol/L - Aluminium avalaibility
taxonIdCalais044	Potential Acidity (H+AL)	5.3	cmolc/dm3	2008-10-21T09:26Z	Extractor Ca(CH3COO)2, 0.5mol/L, pH 7.0	PlotCalais03_/_Potential acidity (H+Al) - cmolc/dm3 - Extractor Ca(CH3COO)2, 0.5mol/L, pH 7.0 - Potential acidity (H+Al)
taxonIdCalais044	Interchangeable Bases	0.63	cmolc/dm3	2008-10-21T09:26Z	Interchangeable bases	PlotCalais03_/_Interchangeable bases - cmolc/dm3 - Interchangeable bases - Sum of Interchangeable bases
taxonIdCalais044	Effective cation exchange capacity	1.7	cmolc/dm3	2008-10-21T09:26Z	Effective cation exchange capacity	PlotCalais03_/_Effective cation exchange capacity - cmolc/dm3 - Effective cation exchange capacity - Effective cation exchange capacity
taxonIdCalais044	Cation exchange capacity at pH 7.0	5.93	cmolc/dm3	2008-10-21T09:26Z	Cation exchange capacity at pH 7.0	PlotCalais03_/_Cation exchange capacity at pH 7.0 - cmolc/dm3 - Cation exchange capacity at pH 7.0 - Cation exchange capacity at pH 7.0
taxonIdCalais044	Saturation of bases	10.6	Percentage	2008-10-21T09:26Z	Saturation of bases	PlotCalais03_/_Saturation of bases - Percentage - Saturation of bases - Saturation of bases
taxonIdCalais044	Saturation of aluminium	62.9	Percentage	2008-10-21T09:26Z	Saturation of aluminium	PlotCalais03_/_Saturation of aluminium - Percentage - Saturation of aluminium - Saturation of aluminium
taxonIdCalais044	Remaining phosphorus	38.3	mg/L	2008-10-21T09:26Z	Extraction with 0.01 mol/L CaCl2	PlotCalais03_/_Remaining phosphorus - mg/L - Remaining phosphorus - Remaining phosphorus
taxonIdCalais044	Rocky outcrops	25	Percentage	2008-10-21T09:26Z	Estimation	PlotCalais03_/_Rocky outcrops - Percentage - Estimation - Rocky outcrops
taxonIdCalais044	Inclination	20	Percentage	2008-10-21T09:26Z	Estimation	PlotCalais03_/_Inclination - Percentage - Estimation - Inclination
taxonIdCalais045	Coarse sand content	36	Percentage	2008-10-21T09:26Z	sieving	PlotCalais03_/_Coarse sand content - Percentage - sieving - Coarse sand content
taxonIdCalais045	Fine sand content	36	Percentage	2008-10-21T09:26Z	sieving	PlotCalais03_/_Fine sand content - Percentage - sieving - Fine sand content
taxonIdCalais045	Silt content	16	Percentage	2008-10-21T09:26Z	sieving	PlotCalais03_/_Silt content - Percentage - sieving - Silt content
taxonIdCalais045	Clay content	12	Percentage	2008-10-21T09:26Z	sieving	PlotCalais03_/_Clay content - Percentage - sieving - Clay content
taxonIdCalais045	Soil acidity (pH)	5.35	nondimensional	2008-10-21T09:26Z	pH in water	PlotCalais03_/_Soil acidity (pH) - nondimensional - pH in water - Soil acidity (pH)
taxonIdCalais045	Availability of phosphorus	2.2	mg/dm3	2008-10-21T09:26Z	Extrator Mehlich 1	PlotCalais03_/_Availability of phosphorus - mg/dm3 - Extrator Mehlich 1 - Availability of phosphorus
taxonIdCalais045	Potassium availability	34	mg/dm3	2008-10-21T09:26Z	Extrator Mehlich 1	PlotCalais03_/_Potassium availability - mg/dm3 - Extrator Mehlich 1 - Potassium availability
taxonIdCalais045	Calcium availability	0.4	cmolc/dm3	2008-10-21T09:26Z	Extractor KCl 1mol/L	PlotCalais03_/_Calcium availability - cmolc/dm3 - Extractor KCl 1mol/L - Calcium availability
taxonIdCalais045	Magnesium availability	0.14	cmolc/dm3	2008-10-21T09:26Z	Extractor KCl 1mol/L	PlotCalais03_/_Magnesium availability - cmolc/dm3 - Extractor KCl 1mol/L - Magnesium availability
taxonIdCalais045	Aluminium avalaibility	1.07	cmolc/dm3	2008-10-21T09:26Z	Extractor KCl 1mol/L	PlotCalais03_/_Aluminium avalaibility - cmolc/dm3 - Extractor KCl 1mol/L - Aluminium avalaibility
taxonIdCalais045	Potential Acidity (H+AL)	5.3	cmolc/dm3	2008-10-21T09:26Z	Extractor Ca(CH3COO)2, 0.5mol/L, pH 7.0	PlotCalais03_/_Potential acidity (H+Al) - cmolc/dm3 - Extractor Ca(CH3COO)2, 0.5mol/L, pH 7.0 - Potential acidity (H+Al)
taxonIdCalais045	Interchangeable Bases	0.63	cmolc/dm3	2008-10-21T09:26Z	Interchangeable bases	PlotCalais03_/_Interchangeable bases - cmolc/dm3 - Interchangeable bases - Sum of Interchangeable bases
taxonIdCalais045	Effective cation exchange capacity	1.7	cmolc/dm3	2008-10-21T09:26Z	Effective cation exchange capacity	PlotCalais03_/_Effective cation exchange capacity - cmolc/dm3 - Effective cation exchange capacity - Effective cation exchange capacity
taxonIdCalais045	Cation exchange capacity at pH 7.0	5.93	cmolc/dm3	2008-10-21T09:26Z	Cation exchange capacity at pH 7.0	PlotCalais03_/_Cation exchange capacity at pH 7.0 - cmolc/dm3 - Cation exchange capacity at pH 7.0 - Cation exchange capacity at pH 7.0
taxonIdCalais045	Saturation of bases	10.6	Percentage	2008-10-21T09:26Z	Saturation of bases	PlotCalais03_/_Saturation of bases - Percentage - Saturation of bases - Saturation of bases
taxonIdCalais045	Saturation of aluminium	62.9	Percentage	2008-10-21T09:26Z	Saturation of aluminium	PlotCalais03_/_Saturation of aluminium - Percentage - Saturation of aluminium - Saturation of aluminium
taxonIdCalais045	Remaining phosphorus	38.3	mg/L	2008-10-21T09:26Z	Extraction with 0.01 mol/L CaCl2	PlotCalais03_/_Remaining phosphorus - mg/L - Remaining phosphorus - Remaining phosphorus
taxonIdCalais045	Rocky outcrops	25	Percentage	2008-10-21T09:26Z	Estimation	PlotCalais03_/_Rocky outcrops - Percentage - Estimation - Rocky outcrops
taxonIdCalais045	Inclination	20	Percentage	2008-10-21T09:26Z	Estimation	PlotCalais03_/_Inclination - Percentage - Estimation - Inclination
taxonIdCalais051	Coarse sand content	36	Percentage	2008-10-21T09:26Z	sieving	PlotCalais03_/_Coarse sand content - Percentage - sieving - Coarse sand content
taxonIdCalais051	Fine sand content	36	Percentage	2008-10-21T09:26Z	sieving	PlotCalais03_/_Fine sand content - Percentage - sieving - Fine sand content
taxonIdCalais051	Silt content	16	Percentage	2008-10-21T09:26Z	sieving	PlotCalais03_/_Silt content - Percentage - sieving - Silt content
taxonIdCalais051	Clay content	12	Percentage	2008-10-21T09:26Z	sieving	PlotCalais03_/_Clay content - Percentage - sieving - Clay content
taxonIdCalais051	Soil acidity (pH)	5.35	nondimensional	2008-10-21T09:26Z	pH in water	PlotCalais03_/_Soil acidity (pH) - nondimensional - pH in water - Soil acidity (pH)
taxonIdCalais051	Availability of phosphorus	2.2	mg/dm3	2008-10-21T09:26Z	Extrator Mehlich 1	PlotCalais03_/_Availability of phosphorus - mg/dm3 - Extrator Mehlich 1 - Availability of phosphorus
taxonIdCalais051	Potassium availability	34	mg/dm3	2008-10-21T09:26Z	Extrator Mehlich 1	PlotCalais03_/_Potassium availability - mg/dm3 - Extrator Mehlich 1 - Potassium availability
taxonIdCalais051	Calcium availability	0.4	cmolc/dm3	2008-10-21T09:26Z	Extractor KCl 1mol/L	PlotCalais03_/_Calcium availability - cmolc/dm3 - Extractor KCl 1mol/L - Calcium availability
taxonIdCalais051	Magnesium availability	0.14	cmolc/dm3	2008-10-21T09:26Z	Extractor KCl 1mol/L	PlotCalais03_/_Magnesium availability - cmolc/dm3 - Extractor KCl 1mol/L - Magnesium availability
taxonIdCalais051	Aluminium avalaibility	1.07	cmolc/dm3	2008-10-21T09:26Z	Extractor KCl 1mol/L	PlotCalais03_/_Aluminium avalaibility - cmolc/dm3 - Extractor KCl 1mol/L - Aluminium avalaibility
taxonIdCalais051	Potential Acidity (H+AL)	5.3	cmolc/dm3	2008-10-21T09:26Z	Extractor Ca(CH3COO)2, 0.5mol/L, pH 7.0	PlotCalais03_/_Potential acidity (H+Al) - cmolc/dm3 - Extractor Ca(CH3COO)2, 0.5mol/L, pH 7.0 - Potential acidity (H+Al)
taxonIdCalais051	Interchangeable Bases	0.63	cmolc/dm3	2008-10-21T09:26Z	Interchangeable bases	PlotCalais03_/_Interchangeable bases - cmolc/dm3 - Interchangeable bases - Sum of Interchangeable bases
taxonIdCalais051	Effective cation exchange capacity	1.7	cmolc/dm3	2008-10-21T09:26Z	Effective cation exchange capacity	PlotCalais03_/_Effective cation exchange capacity - cmolc/dm3 - Effective cation exchange capacity - Effective cation exchange capacity
taxonIdCalais051	Cation exchange capacity at pH 7.0	5.93	cmolc/dm3	2008-10-21T09:26Z	Cation exchange capacity at pH 7.0	PlotCalais03_/_Cation exchange capacity at pH 7.0 - cmolc/dm3 - Cation exchange capacity at pH 7.0 - Cation exchange capacity at pH 7.0
taxonIdCalais051	Saturation of bases	10.6	Percentage	2008-10-21T09:26Z	Saturation of bases	PlotCalais03_/_Saturation of bases - Percentage - Saturation of bases - Saturation of bases
taxonIdCalais051	Saturation of aluminium	62.9	Percentage	2008-10-21T09:26Z	Saturation of aluminium	PlotCalais03_/_Saturation of aluminium - Percentage - Saturation of aluminium - Saturation of aluminium
taxonIdCalais051	Remaining phosphorus	38.3	mg/L	2008-10-21T09:26Z	Extraction with 0.01 mol/L CaCl2	PlotCalais03_/_Remaining phosphorus - mg/L - Remaining phosphorus - Remaining phosphorus
taxonIdCalais051	Rocky outcrops	25	Percentage	2008-10-21T09:26Z	Estimation	PlotCalais03_/_Rocky outcrops - Percentage - Estimation - Rocky outcrops
taxonIdCalais051	Inclination	20	Percentage	2008-10-21T09:26Z	Estimation	PlotCalais03_/_Inclination - Percentage - Estimation - Inclination
taxonIdCalais052	Coarse sand content	36	Percentage	2008-10-21T09:26Z	sieving	PlotCalais03_/_Coarse sand content - Percentage - sieving - Coarse sand content
taxonIdCalais052	Fine sand content	36	Percentage	2008-10-21T09:26Z	sieving	PlotCalais03_/_Fine sand content - Percentage - sieving - Fine sand content
taxonIdCalais052	Silt content	16	Percentage	2008-10-21T09:26Z	sieving	PlotCalais03_/_Silt content - Percentage - sieving - Silt content
taxonIdCalais052	Clay content	12	Percentage	2008-10-21T09:26Z	sieving	PlotCalais03_/_Clay content - Percentage - sieving - Clay content
taxonIdCalais052	Soil acidity (pH)	5.35	nondimensional	2008-10-21T09:26Z	pH in water	PlotCalais03_/_Soil acidity (pH) - nondimensional - pH in water - Soil acidity (pH)
taxonIdCalais052	Availability of phosphorus	2.2	mg/dm3	2008-10-21T09:26Z	Extrator Mehlich 1	PlotCalais03_/_Availability of phosphorus - mg/dm3 - Extrator Mehlich 1 - Availability of phosphorus
taxonIdCalais052	Potassium availability	34	mg/dm3	2008-10-21T09:26Z	Extrator Mehlich 1	PlotCalais03_/_Potassium availability - mg/dm3 - Extrator Mehlich 1 - Potassium availability
taxonIdCalais052	Calcium availability	0.4	cmolc/dm3	2008-10-21T09:26Z	Extractor KCl 1mol/L	PlotCalais03_/_Calcium availability - cmolc/dm3 - Extractor KCl 1mol/L - Calcium availability
taxonIdCalais052	Magnesium availability	0.14	cmolc/dm3	2008-10-21T09:26Z	Extractor KCl 1mol/L	PlotCalais03_/_Magnesium availability - cmolc/dm3 - Extractor KCl 1mol/L - Magnesium availability
taxonIdCalais052	Aluminium avalaibility	1.07	cmolc/dm3	2008-10-21T09:26Z	Extractor KCl 1mol/L	PlotCalais03_/_Aluminium avalaibility - cmolc/dm3 - Extractor KCl 1mol/L - Aluminium avalaibility
taxonIdCalais052	Potential Acidity (H+AL)	5.3	cmolc/dm3	2008-10-21T09:26Z	Extractor Ca(CH3COO)2, 0.5mol/L, pH 7.0	PlotCalais03_/_Potential acidity (H+Al) - cmolc/dm3 - Extractor Ca(CH3COO)2, 0.5mol/L, pH 7.0 - Potential acidity (H+Al)
taxonIdCalais052	Interchangeable Bases	0.63	cmolc/dm3	2008-10-21T09:26Z	Interchangeable bases	PlotCalais03_/_Interchangeable bases - cmolc/dm3 - Interchangeable bases - Sum of Interchangeable bases
taxonIdCalais052	Effective cation exchange capacity	1.7	cmolc/dm3	2008-10-21T09:26Z	Effective cation exchange capacity	PlotCalais03_/_Effective cation exchange capacity - cmolc/dm3 - Effective cation exchange capacity - Effective cation exchange capacity
taxonIdCalais052	Cation exchange capacity at pH 7.0	5.93	cmolc/dm3	2008-10-21T09:26Z	Cation exchange capacity at pH 7.0	PlotCalais03_/_Cation exchange capacity at pH 7.0 - cmolc/dm3 - Cation exchange capacity at pH 7.0 - Cation exchange capacity at pH 7.0
taxonIdCalais052	Saturation of bases	10.6	Percentage	2008-10-21T09:26Z	Saturation of bases	PlotCalais03_/_Saturation of bases - Percentage - Saturation of bases - Saturation of bases
taxonIdCalais052	Saturation of aluminium	62.9	Percentage	2008-10-21T09:26Z	Saturation of aluminium	PlotCalais03_/_Saturation of aluminium - Percentage - Saturation of aluminium - Saturation of aluminium
taxonIdCalais052	Remaining phosphorus	38.3	mg/L	2008-10-21T09:26Z	Extraction with 0.01 mol/L CaCl2	PlotCalais03_/_Remaining phosphorus - mg/L - Remaining phosphorus - Remaining phosphorus
taxonIdCalais052	Rocky outcrops	25	Percentage	2008-10-21T09:26Z	Estimation	PlotCalais03_/_Rocky outcrops - Percentage - Estimation - Rocky outcrops
taxonIdCalais052	Inclination	20	Percentage	2008-10-21T09:26Z	Estimation	PlotCalais03_/_Inclination - Percentage - Estimation - Inclination
taxonIdCalais054	Coarse sand content	36	Percentage	2008-10-21T09:26Z	sieving	PlotCalais03_/_Coarse sand content - Percentage - sieving - Coarse sand content
taxonIdCalais054	Fine sand content	36	Percentage	2008-10-21T09:26Z	sieving	PlotCalais03_/_Fine sand content - Percentage - sieving - Fine sand content
taxonIdCalais054	Silt content	16	Percentage	2008-10-21T09:26Z	sieving	PlotCalais03_/_Silt content - Percentage - sieving - Silt content
taxonIdCalais054	Clay content	12	Percentage	2008-10-21T09:26Z	sieving	PlotCalais03_/_Clay content - Percentage - sieving - Clay content
taxonIdCalais054	Soil acidity (pH)	5.35	nondimensional	2008-10-21T09:26Z	pH in water	PlotCalais03_/_Soil acidity (pH) - nondimensional - pH in water - Soil acidity (pH)
taxonIdCalais054	Availability of phosphorus	2.2	mg/dm3	2008-10-21T09:26Z	Extrator Mehlich 1	PlotCalais03_/_Availability of phosphorus - mg/dm3 - Extrator Mehlich 1 - Availability of phosphorus
taxonIdCalais054	Potassium availability	34	mg/dm3	2008-10-21T09:26Z	Extrator Mehlich 1	PlotCalais03_/_Potassium availability - mg/dm3 - Extrator Mehlich 1 - Potassium availability
taxonIdCalais054	Calcium availability	0.4	cmolc/dm3	2008-10-21T09:26Z	Extractor KCl 1mol/L	PlotCalais03_/_Calcium availability - cmolc/dm3 - Extractor KCl 1mol/L - Calcium availability
taxonIdCalais054	Magnesium availability	0.14	cmolc/dm3	2008-10-21T09:26Z	Extractor KCl 1mol/L	PlotCalais03_/_Magnesium availability - cmolc/dm3 - Extractor KCl 1mol/L - Magnesium availability
taxonIdCalais054	Aluminium avalaibility	1.07	cmolc/dm3	2008-10-21T09:26Z	Extractor KCl 1mol/L	PlotCalais03_/_Aluminium avalaibility - cmolc/dm3 - Extractor KCl 1mol/L - Aluminium avalaibility
taxonIdCalais054	Potential Acidity (H+AL)	5.3	cmolc/dm3	2008-10-21T09:26Z	Extractor Ca(CH3COO)2, 0.5mol/L, pH 7.0	PlotCalais03_/_Potential acidity (H+Al) - cmolc/dm3 - Extractor Ca(CH3COO)2, 0.5mol/L, pH 7.0 - Potential acidity (H+Al)
taxonIdCalais054	Interchangeable Bases	0.63	cmolc/dm3	2008-10-21T09:26Z	Interchangeable bases	PlotCalais03_/_Interchangeable bases - cmolc/dm3 - Interchangeable bases - Sum of Interchangeable bases
taxonIdCalais054	Effective cation exchange capacity	1.7	cmolc/dm3	2008-10-21T09:26Z	Effective cation exchange capacity	PlotCalais03_/_Effective cation exchange capacity - cmolc/dm3 - Effective cation exchange capacity - Effective cation exchange capacity
taxonIdCalais054	Cation exchange capacity at pH 7.0	5.93	cmolc/dm3	2008-10-21T09:26Z	Cation exchange capacity at pH 7.0	PlotCalais03_/_Cation exchange capacity at pH 7.0 - cmolc/dm3 - Cation exchange capacity at pH 7.0 - Cation exchange capacity at pH 7.0
taxonIdCalais054	Saturation of bases	10.6	Percentage	2008-10-21T09:26Z	Saturation of bases	PlotCalais03_/_Saturation of bases - Percentage - Saturation of bases - Saturation of bases
taxonIdCalais054	Saturation of aluminium	62.9	Percentage	2008-10-21T09:26Z	Saturation of aluminium	PlotCalais03_/_Saturation of aluminium - Percentage - Saturation of aluminium - Saturation of aluminium
taxonIdCalais054	Remaining phosphorus	38.3	mg/L	2008-10-21T09:26Z	Extraction with 0.01 mol/L CaCl2	PlotCalais03_/_Remaining phosphorus - mg/L - Remaining phosphorus - Remaining phosphorus
taxonIdCalais054	Rocky outcrops	25	Percentage	2008-10-21T09:26Z	Estimation	PlotCalais03_/_Rocky outcrops - Percentage - Estimation - Rocky outcrops
taxonIdCalais054	Inclination	20	Percentage	2008-10-21T09:26Z	Estimation	PlotCalais03_/_Inclination - Percentage - Estimation - Inclination
taxonIdCalais055	Coarse sand content	36	Percentage	2008-10-21T09:26Z	sieving	PlotCalais03_/_Coarse sand content - Percentage - sieving - Coarse sand content
taxonIdCalais055	Fine sand content	36	Percentage	2008-10-21T09:26Z	sieving	PlotCalais03_/_Fine sand content - Percentage - sieving - Fine sand content
taxonIdCalais055	Silt content	16	Percentage	2008-10-21T09:26Z	sieving	PlotCalais03_/_Silt content - Percentage - sieving - Silt content
taxonIdCalais055	Clay content	12	Percentage	2008-10-21T09:26Z	sieving	PlotCalais03_/_Clay content - Percentage - sieving - Clay content
taxonIdCalais055	Soil acidity (pH)	5.35	nondimensional	2008-10-21T09:26Z	pH in water	PlotCalais03_/_Soil acidity (pH) - nondimensional - pH in water - Soil acidity (pH)
taxonIdCalais055	Availability of phosphorus	2.2	mg/dm3	2008-10-21T09:26Z	Extrator Mehlich 1	PlotCalais03_/_Availability of phosphorus - mg/dm3 - Extrator Mehlich 1 - Availability of phosphorus
taxonIdCalais055	Potassium availability	34	mg/dm3	2008-10-21T09:26Z	Extrator Mehlich 1	PlotCalais03_/_Potassium availability - mg/dm3 - Extrator Mehlich 1 - Potassium availability
taxonIdCalais055	Calcium availability	0.4	cmolc/dm3	2008-10-21T09:26Z	Extractor KCl 1mol/L	PlotCalais03_/_Calcium availability - cmolc/dm3 - Extractor KCl 1mol/L - Calcium availability
taxonIdCalais055	Magnesium availability	0.14	cmolc/dm3	2008-10-21T09:26Z	Extractor KCl 1mol/L	PlotCalais03_/_Magnesium availability - cmolc/dm3 - Extractor KCl 1mol/L - Magnesium availability
taxonIdCalais055	Aluminium avalaibility	1.07	cmolc/dm3	2008-10-21T09:26Z	Extractor KCl 1mol/L	PlotCalais03_/_Aluminium avalaibility - cmolc/dm3 - Extractor KCl 1mol/L - Aluminium avalaibility
taxonIdCalais055	Potential Acidity (H+AL)	5.3	cmolc/dm3	2008-10-21T09:26Z	Extractor Ca(CH3COO)2, 0.5mol/L, pH 7.0	PlotCalais03_/_Potential acidity (H+Al) - cmolc/dm3 - Extractor Ca(CH3COO)2, 0.5mol/L, pH 7.0 - Potential acidity (H+Al)
taxonIdCalais055	Interchangeable Bases	0.63	cmolc/dm3	2008-10-21T09:26Z	Interchangeable bases	PlotCalais03_/_Interchangeable bases - cmolc/dm3 - Interchangeable bases - Sum of Interchangeable bases
taxonIdCalais055	Effective cation exchange capacity	1.7	cmolc/dm3	2008-10-21T09:26Z	Effective cation exchange capacity	PlotCalais03_/_Effective cation exchange capacity - cmolc/dm3 - Effective cation exchange capacity - Effective cation exchange capacity
taxonIdCalais055	Cation exchange capacity at pH 7.0	5.93	cmolc/dm3	2008-10-21T09:26Z	Cation exchange capacity at pH 7.0	PlotCalais03_/_Cation exchange capacity at pH 7.0 - cmolc/dm3 - Cation exchange capacity at pH 7.0 - Cation exchange capacity at pH 7.0
taxonIdCalais055	Saturation of bases	10.6	Percentage	2008-10-21T09:26Z	Saturation of bases	PlotCalais03_/_Saturation of bases - Percentage - Saturation of bases - Saturation of bases
taxonIdCalais055	Saturation of aluminium	62.9	Percentage	2008-10-21T09:26Z	Saturation of aluminium	PlotCalais03_/_Saturation of aluminium - Percentage - Saturation of aluminium - Saturation of aluminium
taxonIdCalais055	Remaining phosphorus	38.3	mg/L	2008-10-21T09:26Z	Extraction with 0.01 mol/L CaCl2	PlotCalais03_/_Remaining phosphorus - mg/L - Remaining phosphorus - Remaining phosphorus
taxonIdCalais055	Rocky outcrops	25	Percentage	2008-10-21T09:26Z	Estimation	PlotCalais03_/_Rocky outcrops - Percentage - Estimation - Rocky outcrops
taxonIdCalais055	Inclination	20	Percentage	2008-10-21T09:26Z	Estimation	PlotCalais03_/_Inclination - Percentage - Estimation - Inclination
taxonIdCalais056	Coarse sand content	36	Percentage	2008-10-21T09:26Z	sieving	PlotCalais03_/_Coarse sand content - Percentage - sieving - Coarse sand content
taxonIdCalais056	Fine sand content	36	Percentage	2008-10-21T09:26Z	sieving	PlotCalais03_/_Fine sand content - Percentage - sieving - Fine sand content
taxonIdCalais056	Silt content	16	Percentage	2008-10-21T09:26Z	sieving	PlotCalais03_/_Silt content - Percentage - sieving - Silt content
taxonIdCalais056	Clay content	12	Percentage	2008-10-21T09:26Z	sieving	PlotCalais03_/_Clay content - Percentage - sieving - Clay content
taxonIdCalais056	Soil acidity (pH)	5.35	nondimensional	2008-10-21T09:26Z	pH in water	PlotCalais03_/_Soil acidity (pH) - nondimensional - pH in water - Soil acidity (pH)
taxonIdCalais056	Availability of phosphorus	2.2	mg/dm3	2008-10-21T09:26Z	Extrator Mehlich 1	PlotCalais03_/_Availability of phosphorus - mg/dm3 - Extrator Mehlich 1 - Availability of phosphorus
taxonIdCalais056	Potassium availability	34	mg/dm3	2008-10-21T09:26Z	Extrator Mehlich 1	PlotCalais03_/_Potassium availability - mg/dm3 - Extrator Mehlich 1 - Potassium availability
taxonIdCalais056	Calcium availability	0.4	cmolc/dm3	2008-10-21T09:26Z	Extractor KCl 1mol/L	PlotCalais03_/_Calcium availability - cmolc/dm3 - Extractor KCl 1mol/L - Calcium availability
taxonIdCalais056	Magnesium availability	0.14	cmolc/dm3	2008-10-21T09:26Z	Extractor KCl 1mol/L	PlotCalais03_/_Magnesium availability - cmolc/dm3 - Extractor KCl 1mol/L - Magnesium availability
taxonIdCalais056	Aluminium avalaibility	1.07	cmolc/dm3	2008-10-21T09:26Z	Extractor KCl 1mol/L	PlotCalais03_/_Aluminium avalaibility - cmolc/dm3 - Extractor KCl 1mol/L - Aluminium avalaibility
taxonIdCalais056	Potential Acidity (H+AL)	5.3	cmolc/dm3	2008-10-21T09:26Z	Extractor Ca(CH3COO)2, 0.5mol/L, pH 7.0	PlotCalais03_/_Potential acidity (H+Al) - cmolc/dm3 - Extractor Ca(CH3COO)2, 0.5mol/L, pH 7.0 - Potential acidity (H+Al)
taxonIdCalais056	Interchangeable Bases	0.63	cmolc/dm3	2008-10-21T09:26Z	Interchangeable bases	PlotCalais03_/_Interchangeable bases - cmolc/dm3 - Interchangeable bases - Sum of Interchangeable bases
taxonIdCalais056	Effective cation exchange capacity	1.7	cmolc/dm3	2008-10-21T09:26Z	Effective cation exchange capacity	PlotCalais03_/_Effective cation exchange capacity - cmolc/dm3 - Effective cation exchange capacity - Effective cation exchange capacity
taxonIdCalais056	Cation exchange capacity at pH 7.0	5.93	cmolc/dm3	2008-10-21T09:26Z	Cation exchange capacity at pH 7.0	PlotCalais03_/_Cation exchange capacity at pH 7.0 - cmolc/dm3 - Cation exchange capacity at pH 7.0 - Cation exchange capacity at pH 7.0
taxonIdCalais056	Saturation of bases	10.6	Percentage	2008-10-21T09:26Z	Saturation of bases	PlotCalais03_/_Saturation of bases - Percentage - Saturation of bases - Saturation of bases
taxonIdCalais056	Saturation of aluminium	62.9	Percentage	2008-10-21T09:26Z	Saturation of aluminium	PlotCalais03_/_Saturation of aluminium - Percentage - Saturation of aluminium - Saturation of aluminium
taxonIdCalais056	Remaining phosphorus	38.3	mg/L	2008-10-21T09:26Z	Extraction with 0.01 mol/L CaCl2	PlotCalais03_/_Remaining phosphorus - mg/L - Remaining phosphorus - Remaining phosphorus
taxonIdCalais056	Rocky outcrops	25	Percentage	2008-10-21T09:26Z	Estimation	PlotCalais03_/_Rocky outcrops - Percentage - Estimation - Rocky outcrops
taxonIdCalais056	Inclination	20	Percentage	2008-10-21T09:26Z	Estimation	PlotCalais03_/_Inclination - Percentage - Estimation - Inclination
taxonIdCalais057	Coarse sand content	36	Percentage	2008-10-21T09:26Z	sieving	PlotCalais03_/_Coarse sand content - Percentage - sieving - Coarse sand content
taxonIdCalais057	Fine sand content	36	Percentage	2008-10-21T09:26Z	sieving	PlotCalais03_/_Fine sand content - Percentage - sieving - Fine sand content
taxonIdCalais057	Silt content	16	Percentage	2008-10-21T09:26Z	sieving	PlotCalais03_/_Silt content - Percentage - sieving - Silt content
taxonIdCalais057	Clay content	12	Percentage	2008-10-21T09:26Z	sieving	PlotCalais03_/_Clay content - Percentage - sieving - Clay content
taxonIdCalais057	Soil acidity (pH)	5.35	nondimensional	2008-10-21T09:26Z	pH in water	PlotCalais03_/_Soil acidity (pH) - nondimensional - pH in water - Soil acidity (pH)
taxonIdCalais057	Availability of phosphorus	2.2	mg/dm3	2008-10-21T09:26Z	Extrator Mehlich 1	PlotCalais03_/_Availability of phosphorus - mg/dm3 - Extrator Mehlich 1 - Availability of phosphorus
taxonIdCalais057	Potassium availability	34	mg/dm3	2008-10-21T09:26Z	Extrator Mehlich 1	PlotCalais03_/_Potassium availability - mg/dm3 - Extrator Mehlich 1 - Potassium availability
taxonIdCalais057	Calcium availability	0.4	cmolc/dm3	2008-10-21T09:26Z	Extractor KCl 1mol/L	PlotCalais03_/_Calcium availability - cmolc/dm3 - Extractor KCl 1mol/L - Calcium availability
taxonIdCalais057	Magnesium availability	0.14	cmolc/dm3	2008-10-21T09:26Z	Extractor KCl 1mol/L	PlotCalais03_/_Magnesium availability - cmolc/dm3 - Extractor KCl 1mol/L - Magnesium availability
taxonIdCalais057	Aluminium avalaibility	1.07	cmolc/dm3	2008-10-21T09:26Z	Extractor KCl 1mol/L	PlotCalais03_/_Aluminium avalaibility - cmolc/dm3 - Extractor KCl 1mol/L - Aluminium avalaibility
taxonIdCalais057	Potential Acidity (H+AL)	5.3	cmolc/dm3	2008-10-21T09:26Z	Extractor Ca(CH3COO)2, 0.5mol/L, pH 7.0	PlotCalais03_/_Potential acidity (H+Al) - cmolc/dm3 - Extractor Ca(CH3COO)2, 0.5mol/L, pH 7.0 - Potential acidity (H+Al)
taxonIdCalais057	Interchangeable Bases	0.63	cmolc/dm3	2008-10-21T09:26Z	Interchangeable bases	PlotCalais03_/_Interchangeable bases - cmolc/dm3 - Interchangeable bases - Sum of Interchangeable bases
taxonIdCalais057	Effective cation exchange capacity	1.7	cmolc/dm3	2008-10-21T09:26Z	Effective cation exchange capacity	PlotCalais03_/_Effective cation exchange capacity - cmolc/dm3 - Effective cation exchange capacity - Effective cation exchange capacity
taxonIdCalais057	Cation exchange capacity at pH 7.0	5.93	cmolc/dm3	2008-10-21T09:26Z	Cation exchange capacity at pH 7.0	PlotCalais03_/_Cation exchange capacity at pH 7.0 - cmolc/dm3 - Cation exchange capacity at pH 7.0 - Cation exchange capacity at pH 7.0
taxonIdCalais057	Saturation of bases	10.6	Percentage	2008-10-21T09:26Z	Saturation of bases	PlotCalais03_/_Saturation of bases - Percentage - Saturation of bases - Saturation of bases
taxonIdCalais057	Saturation of aluminium	62.9	Percentage	2008-10-21T09:26Z	Saturation of aluminium	PlotCalais03_/_Saturation of aluminium - Percentage - Saturation of aluminium - Saturation of aluminium
taxonIdCalais057	Remaining phosphorus	38.3	mg/L	2008-10-21T09:26Z	Extraction with 0.01 mol/L CaCl2	PlotCalais03_/_Remaining phosphorus - mg/L - Remaining phosphorus - Remaining phosphorus
taxonIdCalais057	Rocky outcrops	25	Percentage	2008-10-21T09:26Z	Estimation	PlotCalais03_/_Rocky outcrops - Percentage - Estimation - Rocky outcrops
taxonIdCalais057	Inclination	20	Percentage	2008-10-21T09:26Z	Estimation	PlotCalais03_/_Inclination - Percentage - Estimation - Inclination
taxonIdCalais059	Coarse sand content	36	Percentage	2008-10-21T09:26Z	sieving	PlotCalais03_/_Coarse sand content - Percentage - sieving - Coarse sand content
taxonIdCalais059	Fine sand content	36	Percentage	2008-10-21T09:26Z	sieving	PlotCalais03_/_Fine sand content - Percentage - sieving - Fine sand content
taxonIdCalais059	Silt content	16	Percentage	2008-10-21T09:26Z	sieving	PlotCalais03_/_Silt content - Percentage - sieving - Silt content
taxonIdCalais059	Clay content	12	Percentage	2008-10-21T09:26Z	sieving	PlotCalais03_/_Clay content - Percentage - sieving - Clay content
taxonIdCalais059	Soil acidity (pH)	5.35	nondimensional	2008-10-21T09:26Z	pH in water	PlotCalais03_/_Soil acidity (pH) - nondimensional - pH in water - Soil acidity (pH)
taxonIdCalais059	Availability of phosphorus	2.2	mg/dm3	2008-10-21T09:26Z	Extrator Mehlich 1	PlotCalais03_/_Availability of phosphorus - mg/dm3 - Extrator Mehlich 1 - Availability of phosphorus
taxonIdCalais059	Potassium availability	34	mg/dm3	2008-10-21T09:26Z	Extrator Mehlich 1	PlotCalais03_/_Potassium availability - mg/dm3 - Extrator Mehlich 1 - Potassium availability
taxonIdCalais059	Calcium availability	0.4	cmolc/dm3	2008-10-21T09:26Z	Extractor KCl 1mol/L	PlotCalais03_/_Calcium availability - cmolc/dm3 - Extractor KCl 1mol/L - Calcium availability
taxonIdCalais059	Magnesium availability	0.14	cmolc/dm3	2008-10-21T09:26Z	Extractor KCl 1mol/L	PlotCalais03_/_Magnesium availability - cmolc/dm3 - Extractor KCl 1mol/L - Magnesium availability
taxonIdCalais059	Aluminium avalaibility	1.07	cmolc/dm3	2008-10-21T09:26Z	Extractor KCl 1mol/L	PlotCalais03_/_Aluminium avalaibility - cmolc/dm3 - Extractor KCl 1mol/L - Aluminium avalaibility
taxonIdCalais059	Potential Acidity (H+AL)	5.3	cmolc/dm3	2008-10-21T09:26Z	Extractor Ca(CH3COO)2, 0.5mol/L, pH 7.0	PlotCalais03_/_Potential acidity (H+Al) - cmolc/dm3 - Extractor Ca(CH3COO)2, 0.5mol/L, pH 7.0 - Potential acidity (H+Al)
taxonIdCalais059	Interchangeable Bases	0.63	cmolc/dm3	2008-10-21T09:26Z	Interchangeable bases	PlotCalais03_/_Interchangeable bases - cmolc/dm3 - Interchangeable bases - Sum of Interchangeable bases
taxonIdCalais059	Effective cation exchange capacity	1.7	cmolc/dm3	2008-10-21T09:26Z	Effective cation exchange capacity	PlotCalais03_/_Effective cation exchange capacity - cmolc/dm3 - Effective cation exchange capacity - Effective cation exchange capacity
taxonIdCalais059	Cation exchange capacity at pH 7.0	5.93	cmolc/dm3	2008-10-21T09:26Z	Cation exchange capacity at pH 7.0	PlotCalais03_/_Cation exchange capacity at pH 7.0 - cmolc/dm3 - Cation exchange capacity at pH 7.0 - Cation exchange capacity at pH 7.0
taxonIdCalais059	Saturation of bases	10.6	Percentage	2008-10-21T09:26Z	Saturation of bases	PlotCalais03_/_Saturation of bases - Percentage - Saturation of bases - Saturation of bases
taxonIdCalais059	Saturation of aluminium	62.9	Percentage	2008-10-21T09:26Z	Saturation of aluminium	PlotCalais03_/_Saturation of aluminium - Percentage - Saturation of aluminium - Saturation of aluminium
taxonIdCalais059	Remaining phosphorus	38.3	mg/L	2008-10-21T09:26Z	Extraction with 0.01 mol/L CaCl2	PlotCalais03_/_Remaining phosphorus - mg/L - Remaining phosphorus - Remaining phosphorus
taxonIdCalais059	Rocky outcrops	25	Percentage	2008-10-21T09:26Z	Estimation	PlotCalais03_/_Rocky outcrops - Percentage - Estimation - Rocky outcrops
taxonIdCalais059	Inclination	20	Percentage	2008-10-21T09:26Z	Estimation	PlotCalais03_/_Inclination - Percentage - Estimation - Inclination
taxonIdCalais062	Coarse sand content	36	Percentage	2008-10-21T09:26Z	sieving	PlotCalais03_/_Coarse sand content - Percentage - sieving - Coarse sand content
taxonIdCalais062	Fine sand content	36	Percentage	2008-10-21T09:26Z	sieving	PlotCalais03_/_Fine sand content - Percentage - sieving - Fine sand content
taxonIdCalais062	Silt content	16	Percentage	2008-10-21T09:26Z	sieving	PlotCalais03_/_Silt content - Percentage - sieving - Silt content
taxonIdCalais062	Clay content	12	Percentage	2008-10-21T09:26Z	sieving	PlotCalais03_/_Clay content - Percentage - sieving - Clay content
[truncated: 7,102 more rows]
