# Supplementary material for: Vascular plant community composition from the campos rupestres of the Itacolomi State Park, Brazil
Source: Biodivers Data J. 2015 Feb 27;(3):e4507. doi: 10.3897/BDJ.3.e4507 (PMC4355493; doi:10.3897/BDJ.3.e4507)
Supplement: Supplementary material 2 — Calais [file biodiversity_data_journal-3-e4507-s002.zip › camporupestre-15plot-survey-sampling-itacolomi-calais107-checklist/measurementorfactspeciescardinality.txt]

id	measurementType	measurementValue	measurementUnit	measurementDeterminedDate	measurementMethod	measurementRemarks
taxonIdCalais007	phytosociological survey estimating species cardinality (a combiantion of species cover and abundance) in a 10x10m plot	2b	Category Species cardinality	2008-10-21T09:26Z	Estimating species cardinality using Wilmanns cover-abundance scale (Wilmanns 1973)	PlotCalais01
taxonIdCalais008	phytosociological survey estimating species cardinality (a combiantion of species cover and abundance) in a 10x10m plot	r	Category Species cardinality	2008-10-21T09:26Z	Estimating species cardinality using Wilmanns cover-abundance scale (Wilmanns 1973)	PlotCalais01
taxonIdCalais011	phytosociological survey estimating species cardinality (a combiantion of species cover and abundance) in a 10x10m plot	2a	Category Species cardinality	2008-10-21T09:26Z	Estimating species cardinality using Wilmanns cover-abundance scale (Wilmanns 1973)	PlotCalais01
taxonIdCalais014	phytosociological survey estimating species cardinality (a combiantion of species cover and abundance) in a 10x10m plot	+	Category Species cardinality	2008-10-21T09:26Z	Estimating species cardinality using Wilmanns cover-abundance scale (Wilmanns 1973)	PlotCalais01
taxonIdCalais015	phytosociological survey estimating species cardinality (a combiantion of species cover and abundance) in a 10x10m plot	r	Category Species cardinality	2008-10-21T09:26Z	Estimating species cardinality using Wilmanns cover-abundance scale (Wilmanns 1973)	PlotCalais01
taxonIdCalais016	phytosociological survey estimating species cardinality (a combiantion of species cover and abundance) in a 10x10m plot	1	Category Species cardinality	2008-10-21T09:26Z	Estimating species cardinality using Wilmanns cover-abundance scale (Wilmanns 1973)	PlotCalais01
taxonIdCalais020	phytosociological survey estimating species cardinality (a combiantion of species cover and abundance) in a 10x10m plot	r	Category Species cardinality	2008-10-21T09:26Z	Estimating species cardinality using Wilmanns cover-abundance scale (Wilmanns 1973)	PlotCalais01
taxonIdCalais022	phytosociological survey estimating species cardinality (a combiantion of species cover and abundance) in a 10x10m plot	r	Category Species cardinality	2008-10-21T09:26Z	Estimating species cardinality using Wilmanns cover-abundance scale (Wilmanns 1973)	PlotCalais01
taxonIdCalais023	phytosociological survey estimating species cardinality (a combiantion of species cover and abundance) in a 10x10m plot	1	Category Species cardinality	2008-10-21T09:26Z	Estimating species cardinality using Wilmanns cover-abundance scale (Wilmanns 1973)	PlotCalais01
taxonIdCalais026	phytosociological survey estimating species cardinality (a combiantion of species cover and abundance) in a 10x10m plot	+	Category Species cardinality	2008-10-21T09:26Z	Estimating species cardinality using Wilmanns cover-abundance scale (Wilmanns 1973)	PlotCalais01
taxonIdCalais034	phytosociological survey estimating species cardinality (a combiantion of species cover and abundance) in a 10x10m plot	2m	Category Species cardinality	2008-10-21T09:26Z	Estimating species cardinality using Wilmanns cover-abundance scale (Wilmanns 1973)	PlotCalais01
taxonIdCalais038	phytosociological survey estimating species cardinality (a combiantion of species cover and abundance) in a 10x10m plot	r	Category Species cardinality	2008-10-21T09:26Z	Estimating species cardinality using Wilmanns cover-abundance scale (Wilmanns 1973)	PlotCalais01
taxonIdCalais040	phytosociological survey estimating species cardinality (a combiantion of species cover and abundance) in a 10x10m plot	1	Category Species cardinality	2008-10-21T09:26Z	Estimating species cardinality using Wilmanns cover-abundance scale (Wilmanns 1973)	PlotCalais01
taxonIdCalais042	phytosociological survey estimating species cardinality (a combiantion of species cover and abundance) in a 10x10m plot	r	Category Species cardinality	2008-10-21T09:26Z	Estimating species cardinality using Wilmanns cover-abundance scale (Wilmanns 1973)	PlotCalais01
taxonIdCalais044	phytosociological survey estimating species cardinality (a combiantion of species cover and abundance) in a 10x10m plot	+	Category Species cardinality	2008-10-21T09:26Z	Estimating species cardinality using Wilmanns cover-abundance scale (Wilmanns 1973)	PlotCalais01
taxonIdCalais049	phytosociological survey estimating species cardinality (a combiantion of species cover and abundance) in a 10x10m plot	1	Category Species cardinality	2008-10-21T09:26Z	Estimating species cardinality using Wilmanns cover-abundance scale (Wilmanns 1973)	PlotCalais01
taxonIdCalais051	phytosociological survey estimating species cardinality (a combiantion of species cover and abundance) in a 10x10m plot	1	Category Species cardinality	2008-10-21T09:26Z	Estimating species cardinality using Wilmanns cover-abundance scale (Wilmanns 1973)	PlotCalais01
taxonIdCalais052	phytosociological survey estimating species cardinality (a combiantion of species cover and abundance) in a 10x10m plot	+	Category Species cardinality	2008-10-21T09:26Z	Estimating species cardinality using Wilmanns cover-abundance scale (Wilmanns 1973)	PlotCalais01
taxonIdCalais056	phytosociological survey estimating species cardinality (a combiantion of species cover and abundance) in a 10x10m plot	1	Category Species cardinality	2008-10-21T09:26Z	Estimating species cardinality using Wilmanns cover-abundance scale (Wilmanns 1973)	PlotCalais01
taxonIdCalais058	phytosociological survey estimating species cardinality (a combiantion of species cover and abundance) in a 10x10m plot	r	Category Species cardinality	2008-10-21T09:26Z	Estimating species cardinality using Wilmanns cover-abundance scale (Wilmanns 1973)	PlotCalais01
taxonIdCalais061	phytosociological survey estimating species cardinality (a combiantion of species cover and abundance) in a 10x10m plot	r	Category Species cardinality	2008-10-21T09:26Z	Estimating species cardinality using Wilmanns cover-abundance scale (Wilmanns 1973)	PlotCalais01
taxonIdCalais063	phytosociological survey estimating species cardinality (a combiantion of species cover and abundance) in a 10x10m plot	+	Category Species cardinality	2008-10-21T09:26Z	Estimating species cardinality using Wilmanns cover-abundance scale (Wilmanns 1973)	PlotCalais01
taxonIdCalais065	phytosociological survey estimating species cardinality (a combiantion of species cover and abundance) in a 10x10m plot	1	Category Species cardinality	2008-10-21T09:26Z	Estimating species cardinality using Wilmanns cover-abundance scale (Wilmanns 1973)	PlotCalais01
taxonIdCalais067	phytosociological survey estimating species cardinality (a combiantion of species cover and abundance) in a 10x10m plot	1	Category Species cardinality	2008-10-21T09:26Z	Estimating species cardinality using Wilmanns cover-abundance scale (Wilmanns 1973)	PlotCalais01
taxonIdCalais068	phytosociological survey estimating species cardinality (a combiantion of species cover and abundance) in a 10x10m plot	+	Category Species cardinality	2008-10-21T09:26Z	Estimating species cardinality using Wilmanns cover-abundance scale (Wilmanns 1973)	PlotCalais01
taxonIdCalais069	phytosociological survey estimating species cardinality (a combiantion of species cover and abundance) in a 10x10m plot	1	Category Species cardinality	2008-10-21T09:26Z	Estimating species cardinality using Wilmanns cover-abundance scale (Wilmanns 1973)	PlotCalais01
taxonIdCalais074	phytosociological survey estimating species cardinality (a combiantion of species cover and abundance) in a 10x10m plot	2m	Category Species cardinality	2008-10-21T09:26Z	Estimating species cardinality using Wilmanns cover-abundance scale (Wilmanns 1973)	PlotCalais01
taxonIdCalais076	phytosociological survey estimating species cardinality (a combiantion of species cover and abundance) in a 10x10m plot	1	Category Species cardinality	2008-10-21T09:26Z	Estimating species cardinality using Wilmanns cover-abundance scale (Wilmanns 1973)	PlotCalais01
taxonIdCalais077	phytosociological survey estimating species cardinality (a combiantion of species cover and abundance) in a 10x10m plot	1	Category Species cardinality	2008-10-21T09:26Z	Estimating species cardinality using Wilmanns cover-abundance scale (Wilmanns 1973)	PlotCalais01
taxonIdCalais078	phytosociological survey estimating species cardinality (a combiantion of species cover and abundance) in a 10x10m plot	2a	Category Species cardinality	2008-10-21T09:26Z	Estimating species cardinality using Wilmanns cover-abundance scale (Wilmanns 1973)	PlotCalais01
taxonIdCalais079	phytosociological survey estimating species cardinality (a combiantion of species cover and abundance) in a 10x10m plot	1	Category Species cardinality	2008-10-21T09:26Z	Estimating species cardinality using Wilmanns cover-abundance scale (Wilmanns 1973)	PlotCalais01
taxonIdCalais081	phytosociological survey estimating species cardinality (a combiantion of species cover and abundance) in a 10x10m plot	4	Category Species cardinality	2008-10-21T09:26Z	Estimating species cardinality using Wilmanns cover-abundance scale (Wilmanns 1973)	PlotCalais01
taxonIdCalais083	phytosociological survey estimating species cardinality (a combiantion of species cover and abundance) in a 10x10m plot	1	Category Species cardinality	2008-10-21T09:26Z	Estimating species cardinality using Wilmanns cover-abundance scale (Wilmanns 1973)	PlotCalais01
taxonIdCalais084	phytosociological survey estimating species cardinality (a combiantion of species cover and abundance) in a 10x10m plot	1	Category Species cardinality	2008-10-21T09:26Z	Estimating species cardinality using Wilmanns cover-abundance scale (Wilmanns 1973)	PlotCalais01
taxonIdCalais087	phytosociological survey estimating species cardinality (a combiantion of species cover and abundance) in a 10x10m plot	1	Category Species cardinality	2008-10-21T09:26Z	Estimating species cardinality using Wilmanns cover-abundance scale (Wilmanns 1973)	PlotCalais01
taxonIdCalais089	phytosociological survey estimating species cardinality (a combiantion of species cover and abundance) in a 10x10m plot	2m	Category Species cardinality	2008-10-21T09:26Z	Estimating species cardinality using Wilmanns cover-abundance scale (Wilmanns 1973)	PlotCalais01
taxonIdCalais091	phytosociological survey estimating species cardinality (a combiantion of species cover and abundance) in a 10x10m plot	2m	Category Species cardinality	2008-10-21T09:26Z	Estimating species cardinality using Wilmanns cover-abundance scale (Wilmanns 1973)	PlotCalais01
taxonIdCalais092	phytosociological survey estimating species cardinality (a combiantion of species cover and abundance) in a 10x10m plot	1	Category Species cardinality	2008-10-21T09:26Z	Estimating species cardinality using Wilmanns cover-abundance scale (Wilmanns 1973)	PlotCalais01
taxonIdCalais093	phytosociological survey estimating species cardinality (a combiantion of species cover and abundance) in a 10x10m plot	1	Category Species cardinality	2008-10-21T09:26Z	Estimating species cardinality using Wilmanns cover-abundance scale (Wilmanns 1973)	PlotCalais01
taxonIdCalais094	phytosociological survey estimating species cardinality (a combiantion of species cover and abundance) in a 10x10m plot	+	Category Species cardinality	2008-10-21T09:26Z	Estimating species cardinality using Wilmanns cover-abundance scale (Wilmanns 1973)	PlotCalais01
taxonIdCalais097	phytosociological survey estimating species cardinality (a combiantion of species cover and abundance) in a 10x10m plot	1	Category Species cardinality	2008-10-21T09:26Z	Estimating species cardinality using Wilmanns cover-abundance scale (Wilmanns 1973)	PlotCalais01
taxonIdCalais100	phytosociological survey estimating species cardinality (a combiantion of species cover and abundance) in a 10x10m plot	+	Category Species cardinality	2008-10-21T09:26Z	Estimating species cardinality using Wilmanns cover-abundance scale (Wilmanns 1973)	PlotCalais01
taxonIdCalais101	phytosociological survey estimating species cardinality (a combiantion of species cover and abundance) in a 10x10m plot	2m	Category Species cardinality	2008-10-21T09:26Z	Estimating species cardinality using Wilmanns cover-abundance scale (Wilmanns 1973)	PlotCalais01
taxonIdCalais005	phytosociological survey estimating species cardinality (a combiantion of species cover and abundance) in a 10x10m plot	+	Category Species cardinality	2008-10-21T09:26Z	Estimating species cardinality using Wilmanns cover-abundance scale (Wilmanns 1973)	PlotCalais02
taxonIdCalais007	phytosociological survey estimating species cardinality (a combiantion of species cover and abundance) in a 10x10m plot	2a	Category Species cardinality	2008-10-21T09:26Z	Estimating species cardinality using Wilmanns cover-abundance scale (Wilmanns 1973)	PlotCalais02
taxonIdCalais009	phytosociological survey estimating species cardinality (a combiantion of species cover and abundance) in a 10x10m plot	+	Category Species cardinality	2008-10-21T09:26Z	Estimating species cardinality using Wilmanns cover-abundance scale (Wilmanns 1973)	PlotCalais02
taxonIdCalais010	phytosociological survey estimating species cardinality (a combiantion of species cover and abundance) in a 10x10m plot	1	Category Species cardinality	2008-10-21T09:26Z	Estimating species cardinality using Wilmanns cover-abundance scale (Wilmanns 1973)	PlotCalais02
taxonIdCalais011	phytosociological survey estimating species cardinality (a combiantion of species cover and abundance) in a 10x10m plot	1	Category Species cardinality	2008-10-21T09:26Z	Estimating species cardinality using Wilmanns cover-abundance scale (Wilmanns 1973)	PlotCalais02
taxonIdCalais015	phytosociological survey estimating species cardinality (a combiantion of species cover and abundance) in a 10x10m plot	+	Category Species cardinality	2008-10-21T09:26Z	Estimating species cardinality using Wilmanns cover-abundance scale (Wilmanns 1973)	PlotCalais02
taxonIdCalais016	phytosociological survey estimating species cardinality (a combiantion of species cover and abundance) in a 10x10m plot	r	Category Species cardinality	2008-10-21T09:26Z	Estimating species cardinality using Wilmanns cover-abundance scale (Wilmanns 1973)	PlotCalais02
taxonIdCalais017	phytosociological survey estimating species cardinality (a combiantion of species cover and abundance) in a 10x10m plot	+	Category Species cardinality	2008-10-21T09:26Z	Estimating species cardinality using Wilmanns cover-abundance scale (Wilmanns 1973)	PlotCalais02
taxonIdCalais021	phytosociological survey estimating species cardinality (a combiantion of species cover and abundance) in a 10x10m plot	1	Category Species cardinality	2008-10-21T09:26Z	Estimating species cardinality using Wilmanns cover-abundance scale (Wilmanns 1973)	PlotCalais02
taxonIdCalais022	phytosociological survey estimating species cardinality (a combiantion of species cover and abundance) in a 10x10m plot	1	Category Species cardinality	2008-10-21T09:26Z	Estimating species cardinality using Wilmanns cover-abundance scale (Wilmanns 1973)	PlotCalais02
taxonIdCalais023	phytosociological survey estimating species cardinality (a combiantion of species cover and abundance) in a 10x10m plot	+	Category Species cardinality	2008-10-21T09:26Z	Estimating species cardinality using Wilmanns cover-abundance scale (Wilmanns 1973)	PlotCalais02
taxonIdCalais034	phytosociological survey estimating species cardinality (a combiantion of species cover and abundance) in a 10x10m plot	2m	Category Species cardinality	2008-10-21T09:26Z	Estimating species cardinality using Wilmanns cover-abundance scale (Wilmanns 1973)	PlotCalais02
taxonIdCalais040	phytosociological survey estimating species cardinality (a combiantion of species cover and abundance) in a 10x10m plot	1	Category Species cardinality	2008-10-21T09:26Z	Estimating species cardinality using Wilmanns cover-abundance scale (Wilmanns 1973)	PlotCalais02
taxonIdCalais042	phytosociological survey estimating species cardinality (a combiantion of species cover and abundance) in a 10x10m plot	1	Category Species cardinality	2008-10-21T09:26Z	Estimating species cardinality using Wilmanns cover-abundance scale (Wilmanns 1973)	PlotCalais02
taxonIdCalais044	phytosociological survey estimating species cardinality (a combiantion of species cover and abundance) in a 10x10m plot	+	Category Species cardinality	2008-10-21T09:26Z	Estimating species cardinality using Wilmanns cover-abundance scale (Wilmanns 1973)	PlotCalais02
taxonIdCalais045	phytosociological survey estimating species cardinality (a combiantion of species cover and abundance) in a 10x10m plot	1	Category Species cardinality	2008-10-21T09:26Z	Estimating species cardinality using Wilmanns cover-abundance scale (Wilmanns 1973)	PlotCalais02
taxonIdCalais051	phytosociological survey estimating species cardinality (a combiantion of species cover and abundance) in a 10x10m plot	1	Category Species cardinality	2008-10-21T09:26Z	Estimating species cardinality using Wilmanns cover-abundance scale (Wilmanns 1973)	PlotCalais02
taxonIdCalais052	phytosociological survey estimating species cardinality (a combiantion of species cover and abundance) in a 10x10m plot	+	Category Species cardinality	2008-10-21T09:26Z	Estimating species cardinality using Wilmanns cover-abundance scale (Wilmanns 1973)	PlotCalais02
taxonIdCalais062	phytosociological survey estimating species cardinality (a combiantion of species cover and abundance) in a 10x10m plot	+	Category Species cardinality	2008-10-21T09:26Z	Estimating species cardinality using Wilmanns cover-abundance scale (Wilmanns 1973)	PlotCalais02
taxonIdCalais063	phytosociological survey estimating species cardinality (a combiantion of species cover and abundance) in a 10x10m plot	+	Category Species cardinality	2008-10-21T09:26Z	Estimating species cardinality using Wilmanns cover-abundance scale (Wilmanns 1973)	PlotCalais02
taxonIdCalais066	phytosociological survey estimating species cardinality (a combiantion of species cover and abundance) in a 10x10m plot	+	Category Species cardinality	2008-10-21T09:26Z	Estimating species cardinality using Wilmanns cover-abundance scale (Wilmanns 1973)	PlotCalais02
taxonIdCalais067	phytosociological survey estimating species cardinality (a combiantion of species cover and abundance) in a 10x10m plot	1	Category Species cardinality	2008-10-21T09:26Z	Estimating species cardinality using Wilmanns cover-abundance scale (Wilmanns 1973)	PlotCalais02
taxonIdCalais068	phytosociological survey estimating species cardinality (a combiantion of species cover and abundance) in a 10x10m plot	+	Category Species cardinality	2008-10-21T09:26Z	Estimating species cardinality using Wilmanns cover-abundance scale (Wilmanns 1973)	PlotCalais02
taxonIdCalais069	phytosociological survey estimating species cardinality (a combiantion of species cover and abundance) in a 10x10m plot	+	Category Species cardinality	2008-10-21T09:26Z	Estimating species cardinality using Wilmanns cover-abundance scale (Wilmanns 1973)	PlotCalais02
taxonIdCalais074	phytosociological survey estimating species cardinality (a combiantion of species cover and abundance) in a 10x10m plot	1	Category Species cardinality	2008-10-21T09:26Z	Estimating species cardinality using Wilmanns cover-abundance scale (Wilmanns 1973)	PlotCalais02
taxonIdCalais076	phytosociological survey estimating species cardinality (a combiantion of species cover and abundance) in a 10x10m plot	2m	Category Species cardinality	2008-10-21T09:26Z	Estimating species cardinality using Wilmanns cover-abundance scale (Wilmanns 1973)	PlotCalais02
taxonIdCalais078	phytosociological survey estimating species cardinality (a combiantion of species cover and abundance) in a 10x10m plot	2m	Category Species cardinality	2008-10-21T09:26Z	Estimating species cardinality using Wilmanns cover-abundance scale (Wilmanns 1973)	PlotCalais02
taxonIdCalais081	phytosociological survey estimating species cardinality (a combiantion of species cover and abundance) in a 10x10m plot	4	Category Species cardinality	2008-10-21T09:26Z	Estimating species cardinality using Wilmanns cover-abundance scale (Wilmanns 1973)	PlotCalais02
taxonIdCalais083	phytosociological survey estimating species cardinality (a combiantion of species cover and abundance) in a 10x10m plot	1	Category Species cardinality	2008-10-21T09:26Z	Estimating species cardinality using Wilmanns cover-abundance scale (Wilmanns 1973)	PlotCalais02
taxonIdCalais084	phytosociological survey estimating species cardinality (a combiantion of species cover and abundance) in a 10x10m plot	2m	Category Species cardinality	2008-10-21T09:26Z	Estimating species cardinality using Wilmanns cover-abundance scale (Wilmanns 1973)	PlotCalais02
taxonIdCalais087	phytosociological survey estimating species cardinality (a combiantion of species cover and abundance) in a 10x10m plot	1	Category Species cardinality	2008-10-21T09:26Z	Estimating species cardinality using Wilmanns cover-abundance scale (Wilmanns 1973)	PlotCalais02
taxonIdCalais097	phytosociological survey estimating species cardinality (a combiantion of species cover and abundance) in a 10x10m plot	+	Category Species cardinality	2008-10-21T09:26Z	Estimating species cardinality using Wilmanns cover-abundance scale (Wilmanns 1973)	PlotCalais02
taxonIdCalais101	phytosociological survey estimating species cardinality (a combiantion of species cover and abundance) in a 10x10m plot	2m	Category Species cardinality	2008-10-21T09:26Z	Estimating species cardinality using Wilmanns cover-abundance scale (Wilmanns 1973)	PlotCalais02
taxonIdCalais107	phytosociological survey estimating species cardinality (a combiantion of species cover and abundance) in a 10x10m plot	1	Category Species cardinality	2008-10-21T09:26Z	Estimating species cardinality using Wilmanns cover-abundance scale (Wilmanns 1973)	PlotCalais02
taxonIdCalais006	phytosociological survey estimating species cardinality (a combiantion of species cover and abundance) in a 10x10m plot	r	Category Species cardinality	2008-10-21T09:26Z	Estimating species cardinality using Wilmanns cover-abundance scale (Wilmanns 1973)	PlotCalais03
taxonIdCalais007	phytosociological survey estimating species cardinality (a combiantion of species cover and abundance) in a 10x10m plot	1	Category Species cardinality	2008-10-21T09:26Z	Estimating species cardinality using Wilmanns cover-abundance scale (Wilmanns 1973)	PlotCalais03
taxonIdCalais008	phytosociological survey estimating species cardinality (a combiantion of species cover and abundance) in a 10x10m plot	1	Category Species cardinality	2008-10-21T09:26Z	Estimating species cardinality using Wilmanns cover-abundance scale (Wilmanns 1973)	PlotCalais03
taxonIdCalais010	phytosociological survey estimating species cardinality (a combiantion of species cover and abundance) in a 10x10m plot	1	Category Species cardinality	2008-10-21T09:26Z	Estimating species cardinality using Wilmanns cover-abundance scale (Wilmanns 1973)	PlotCalais03
taxonIdCalais011	phytosociological survey estimating species cardinality (a combiantion of species cover and abundance) in a 10x10m plot	1	Category Species cardinality	2008-10-21T09:26Z	Estimating species cardinality using Wilmanns cover-abundance scale (Wilmanns 1973)	PlotCalais03
taxonIdCalais013	phytosociological survey estimating species cardinality (a combiantion of species cover and abundance) in a 10x10m plot	r	Category Species cardinality	2008-10-21T09:26Z	Estimating species cardinality using Wilmanns cover-abundance scale (Wilmanns 1973)	PlotCalais03
taxonIdCalais014	phytosociological survey estimating species cardinality (a combiantion of species cover and abundance) in a 10x10m plot	2a	Category Species cardinality	2008-10-21T09:26Z	Estimating species cardinality using Wilmanns cover-abundance scale (Wilmanns 1973)	PlotCalais03
taxonIdCalais015	phytosociological survey estimating species cardinality (a combiantion of species cover and abundance) in a 10x10m plot	+	Category Species cardinality	2008-10-21T09:26Z	Estimating species cardinality using Wilmanns cover-abundance scale (Wilmanns 1973)	PlotCalais03
taxonIdCalais016	phytosociological survey estimating species cardinality (a combiantion of species cover and abundance) in a 10x10m plot	+	Category Species cardinality	2008-10-21T09:26Z	Estimating species cardinality using Wilmanns cover-abundance scale (Wilmanns 1973)	PlotCalais03
taxonIdCalais020	phytosociological survey estimating species cardinality (a combiantion of species cover and abundance) in a 10x10m plot	+	Category Species cardinality	2008-10-21T09:26Z	Estimating species cardinality using Wilmanns cover-abundance scale (Wilmanns 1973)	PlotCalais03
taxonIdCalais022	phytosociological survey estimating species cardinality (a combiantion of species cover and abundance) in a 10x10m plot	1	Category Species cardinality	2008-10-21T09:26Z	Estimating species cardinality using Wilmanns cover-abundance scale (Wilmanns 1973)	PlotCalais03
taxonIdCalais025	phytosociological survey estimating species cardinality (a combiantion of species cover and abundance) in a 10x10m plot	r	Category Species cardinality	2008-10-21T09:26Z	Estimating species cardinality using Wilmanns cover-abundance scale (Wilmanns 1973)	PlotCalais03
taxonIdCalais026	phytosociological survey estimating species cardinality (a combiantion of species cover and abundance) in a 10x10m plot	+	Category Species cardinality	2008-10-21T09:26Z	Estimating species cardinality using Wilmanns cover-abundance scale (Wilmanns 1973)	PlotCalais03
taxonIdCalais028	phytosociological survey estimating species cardinality (a combiantion of species cover and abundance) in a 10x10m plot	+	Category Species cardinality	2008-10-21T09:26Z	Estimating species cardinality using Wilmanns cover-abundance scale (Wilmanns 1973)	PlotCalais03
taxonIdCalais030	phytosociological survey estimating species cardinality (a combiantion of species cover and abundance) in a 10x10m plot	1	Category Species cardinality	2008-10-21T09:26Z	Estimating species cardinality using Wilmanns cover-abundance scale (Wilmanns 1973)	PlotCalais03
taxonIdCalais031	phytosociological survey estimating species cardinality (a combiantion of species cover and abundance) in a 10x10m plot	1	Category Species cardinality	2008-10-21T09:26Z	Estimating species cardinality using Wilmanns cover-abundance scale (Wilmanns 1973)	PlotCalais03
taxonIdCalais039	phytosociological survey estimating species cardinality (a combiantion of species cover and abundance) in a 10x10m plot	r	Category Species cardinality	2008-10-21T09:26Z	Estimating species cardinality using Wilmanns cover-abundance scale (Wilmanns 1973)	PlotCalais03
taxonIdCalais042	phytosociological survey estimating species cardinality (a combiantion of species cover and abundance) in a 10x10m plot	1	Category Species cardinality	2008-10-21T09:26Z	Estimating species cardinality using Wilmanns cover-abundance scale (Wilmanns 1973)	PlotCalais03
taxonIdCalais043	phytosociological survey estimating species cardinality (a combiantion of species cover and abundance) in a 10x10m plot	+	Category Species cardinality	2008-10-21T09:26Z	Estimating species cardinality using Wilmanns cover-abundance scale (Wilmanns 1973)	PlotCalais03
taxonIdCalais044	phytosociological survey estimating species cardinality (a combiantion of species cover and abundance) in a 10x10m plot	2a	Category Species cardinality	2008-10-21T09:26Z	Estimating species cardinality using Wilmanns cover-abundance scale (Wilmanns 1973)	PlotCalais03
taxonIdCalais045	phytosociological survey estimating species cardinality (a combiantion of species cover and abundance) in a 10x10m plot	+	Category Species cardinality	2008-10-21T09:26Z	Estimating species cardinality using Wilmanns cover-abundance scale (Wilmanns 1973)	PlotCalais03
taxonIdCalais051	phytosociological survey estimating species cardinality (a combiantion of species cover and abundance) in a 10x10m plot	r	Category Species cardinality	2008-10-21T09:26Z	Estimating species cardinality using Wilmanns cover-abundance scale (Wilmanns 1973)	PlotCalais03
taxonIdCalais052	phytosociological survey estimating species cardinality (a combiantion of species cover and abundance) in a 10x10m plot	r	Category Species cardinality	2008-10-21T09:26Z	Estimating species cardinality using Wilmanns cover-abundance scale (Wilmanns 1973)	PlotCalais03
taxonIdCalais054	phytosociological survey estimating species cardinality (a combiantion of species cover and abundance) in a 10x10m plot	r	Category Species cardinality	2008-10-21T09:26Z	Estimating species cardinality using Wilmanns cover-abundance scale (Wilmanns 1973)	PlotCalais03
taxonIdCalais055	phytosociological survey estimating species cardinality (a combiantion of species cover and abundance) in a 10x10m plot	+	Category Species cardinality	2008-10-21T09:26Z	Estimating species cardinality using Wilmanns cover-abundance scale (Wilmanns 1973)	PlotCalais03
taxonIdCalais056	phytosociological survey estimating species cardinality (a combiantion of species cover and abundance) in a 10x10m plot	+	Category Species cardinality	2008-10-21T09:26Z	Estimating species cardinality using Wilmanns cover-abundance scale (Wilmanns 1973)	PlotCalais03
taxonIdCalais057	phytosociological survey estimating species cardinality (a combiantion of species cover and abundance) in a 10x10m plot	+	Category Species cardinality	2008-10-21T09:26Z	Estimating species cardinality using Wilmanns cover-abundance scale (Wilmanns 1973)	PlotCalais03
taxonIdCalais059	phytosociological survey estimating species cardinality (a combiantion of species cover and abundance) in a 10x10m plot	+	Category Species cardinality	2008-10-21T09:26Z	Estimating species cardinality using Wilmanns cover-abundance scale (Wilmanns 1973)	PlotCalais03
taxonIdCalais062	phytosociological survey estimating species cardinality (a combiantion of species cover and abundance) in a 10x10m plot	r	Category Species cardinality	2008-10-21T09:26Z	Estimating species cardinality using Wilmanns cover-abundance scale (Wilmanns 1973)	PlotCalais03
taxonIdCalais063	phytosociological survey estimating species cardinality (a combiantion of species cover and abundance) in a 10x10m plot	+	Category Species cardinality	2008-10-21T09:26Z	Estimating species cardinality using Wilmanns cover-abundance scale (Wilmanns 1973)	PlotCalais03
taxonIdCalais064	phytosociological survey estimating species cardinality (a combiantion of species cover and abundance) in a 10x10m plot	r	Category Species cardinality	2008-10-21T09:26Z	Estimating species cardinality using Wilmanns cover-abundance scale (Wilmanns 1973)	PlotCalais03
taxonIdCalais067	phytosociological survey estimating species cardinality (a combiantion of species cover and abundance) in a 10x10m plot	+	Category Species cardinality	2008-10-21T09:26Z	Estimating species cardinality using Wilmanns cover-abundance scale (Wilmanns 1973)	PlotCalais03
taxonIdCalais068	phytosociological survey estimating species cardinality (a combiantion of species cover and abundance) in a 10x10m plot	+	Category Species cardinality	2008-10-21T09:26Z	Estimating species cardinality using Wilmanns cover-abundance scale (Wilmanns 1973)	PlotCalais03
taxonIdCalais070	phytosociological survey estimating species cardinality (a combiantion of species cover and abundance) in a 10x10m plot	+	Category Species cardinality	2008-10-21T09:26Z	Estimating species cardinality using Wilmanns cover-abundance scale (Wilmanns 1973)	PlotCalais03
taxonIdCalais071	phytosociological survey estimating species cardinality (a combiantion of species cover and abundance) in a 10x10m plot	r	Category Species cardinality	2008-10-21T09:26Z	Estimating species cardinality using Wilmanns cover-abundance scale (Wilmanns 1973)	PlotCalais03
taxonIdCalais072	phytosociological survey estimating species cardinality (a combiantion of species cover and abundance) in a 10x10m plot	r	Category Species cardinality	2008-10-21T09:26Z	Estimating species cardinality using Wilmanns cover-abundance scale (Wilmanns 1973)	PlotCalais03
taxonIdCalais074	phytosociological survey estimating species cardinality (a combiantion of species cover and abundance) in a 10x10m plot	2a	Category Species cardinality	2008-10-21T09:26Z	Estimating species cardinality using Wilmanns cover-abundance scale (Wilmanns 1973)	PlotCalais03
taxonIdCalais076	phytosociological survey estimating species cardinality (a combiantion of species cover and abundance) in a 10x10m plot	2m	Category Species cardinality	2008-10-21T09:26Z	Estimating species cardinality using Wilmanns cover-abundance scale (Wilmanns 1973)	PlotCalais03
taxonIdCalais078	phytosociological survey estimating species cardinality (a combiantion of species cover and abundance) in a 10x10m plot	2m	Category Species cardinality	2008-10-21T09:26Z	Estimating species cardinality using Wilmanns cover-abundance scale (Wilmanns 1973)	PlotCalais03
taxonIdCalais081	phytosociological survey estimating species cardinality (a combiantion of species cover and abundance) in a 10x10m plot	3	Category Species cardinality	2008-10-21T09:26Z	Estimating species cardinality using Wilmanns cover-abundance scale (Wilmanns 1973)	PlotCalais03
taxonIdCalais082	phytosociological survey estimating species cardinality (a combiantion of species cover and abundance) in a 10x10m plot	1	Category Species cardinality	2008-10-21T09:26Z	Estimating species cardinality using Wilmanns cover-abundance scale (Wilmanns 1973)	PlotCalais03
taxonIdCalais083	phytosociological survey estimating species cardinality (a combiantion of species cover and abundance) in a 10x10m plot	2m	Category Species cardinality	2008-10-21T09:26Z	Estimating species cardinality using Wilmanns cover-abundance scale (Wilmanns 1973)	PlotCalais03
taxonIdCalais093	phytosociological survey estimating species cardinality (a combiantion of species cover and abundance) in a 10x10m plot	2m	Category Species cardinality	2008-10-21T09:26Z	Estimating species cardinality using Wilmanns cover-abundance scale (Wilmanns 1973)	PlotCalais03
taxonIdCalais097	phytosociological survey estimating species cardinality (a combiantion of species cover and abundance) in a 10x10m plot	1	Category Species cardinality	2008-10-21T09:26Z	Estimating species cardinality using Wilmanns cover-abundance scale (Wilmanns 1973)	PlotCalais03
taxonIdCalais099	phytosociological survey estimating species cardinality (a combiantion of species cover and abundance) in a 10x10m plot	r	Category Species cardinality	2008-10-21T09:26Z	Estimating species cardinality using Wilmanns cover-abundance scale (Wilmanns 1973)	PlotCalais03
taxonIdCalais100	phytosociological survey estimating species cardinality (a combiantion of species cover and abundance) in a 10x10m plot	2a	Category Species cardinality	2008-10-21T09:26Z	Estimating species cardinality using Wilmanns cover-abundance scale (Wilmanns 1973)	PlotCalais03
taxonIdCalais101	phytosociological survey estimating species cardinality (a combiantion of species cover and abundance) in a 10x10m plot	1	Category Species cardinality	2008-10-21T09:26Z	Estimating species cardinality using Wilmanns cover-abundance scale (Wilmanns 1973)	PlotCalais03
taxonIdCalais102	phytosociological survey estimating species cardinality (a combiantion of species cover and abundance) in a 10x10m plot	1	Category Species cardinality	2008-10-21T09:26Z	Estimating species cardinality using Wilmanns cover-abundance scale (Wilmanns 1973)	PlotCalais03
taxonIdCalais106	phytosociological survey estimating species cardinality (a combiantion of species cover and abundance) in a 10x10m plot	+	Category Species cardinality	2008-10-21T09:26Z	Estimating species cardinality using Wilmanns cover-abundance scale (Wilmanns 1973)	PlotCalais03
taxonIdCalais107	phytosociological survey estimating species cardinality (a combiantion of species cover and abundance) in a 10x10m plot	1	Category Species cardinality	2008-10-21T09:26Z	Estimating species cardinality using Wilmanns cover-abundance scale (Wilmanns 1973)	PlotCalais03
taxonIdCalais001	phytosociological survey estimating species cardinality (a combiantion of species cover and abundance) in a 10x10m plot	r	Category Species cardinality	2008-10-21T09:26Z	Estimating species cardinality using Wilmanns cover-abundance scale (Wilmanns 1973)	PlotCalais04
taxonIdCalais004	phytosociological survey estimating species cardinality (a combiantion of species cover and abundance) in a 10x10m plot	r	Category Species cardinality	2008-10-21T09:26Z	Estimating species cardinality using Wilmanns cover-abundance scale (Wilmanns 1973)	PlotCalais04
taxonIdCalais008	phytosociological survey estimating species cardinality (a combiantion of species cover and abundance) in a 10x10m plot	+	Category Species cardinality	2008-10-21T09:26Z	Estimating species cardinality using Wilmanns cover-abundance scale (Wilmanns 1973)	PlotCalais04
taxonIdCalais011	phytosociological survey estimating species cardinality (a combiantion of species cover and abundance) in a 10x10m plot	1	Category Species cardinality	2008-10-21T09:26Z	Estimating species cardinality using Wilmanns cover-abundance scale (Wilmanns 1973)	PlotCalais04
taxonIdCalais015	phytosociological survey estimating species cardinality (a combiantion of species cover and abundance) in a 10x10m plot	r	Category Species cardinality	2008-10-21T09:26Z	Estimating species cardinality using Wilmanns cover-abundance scale (Wilmanns 1973)	PlotCalais04
taxonIdCalais016	phytosociological survey estimating species cardinality (a combiantion of species cover and abundance) in a 10x10m plot	+	Category Species cardinality	2008-10-21T09:26Z	Estimating species cardinality using Wilmanns cover-abundance scale (Wilmanns 1973)	PlotCalais04
taxonIdCalais018	phytosociological survey estimating species cardinality (a combiantion of species cover and abundance) in a 10x10m plot	1	Category Species cardinality	2008-10-21T09:26Z	Estimating species cardinality using Wilmanns cover-abundance scale (Wilmanns 1973)	PlotCalais04
taxonIdCalais020	phytosociological survey estimating species cardinality (a combiantion of species cover and abundance) in a 10x10m plot	1	Category Species cardinality	2008-10-21T09:26Z	Estimating species cardinality using Wilmanns cover-abundance scale (Wilmanns 1973)	PlotCalais04
taxonIdCalais025	phytosociological survey estimating species cardinality (a combiantion of species cover and abundance) in a 10x10m plot	r	Category Species cardinality	2008-10-21T09:26Z	Estimating species cardinality using Wilmanns cover-abundance scale (Wilmanns 1973)	PlotCalais04
taxonIdCalais026	phytosociological survey estimating species cardinality (a combiantion of species cover and abundance) in a 10x10m plot	r	Category Species cardinality	2008-10-21T09:26Z	Estimating species cardinality using Wilmanns cover-abundance scale (Wilmanns 1973)	PlotCalais04
taxonIdCalais027	phytosociological survey estimating species cardinality (a combiantion of species cover and abundance) in a 10x10m plot	r	Category Species cardinality	2008-10-21T09:26Z	Estimating species cardinality using Wilmanns cover-abundance scale (Wilmanns 1973)	PlotCalais04
taxonIdCalais028	phytosociological survey estimating species cardinality (a combiantion of species cover and abundance) in a 10x10m plot	+	Category Species cardinality	2008-10-21T09:26Z	Estimating species cardinality using Wilmanns cover-abundance scale (Wilmanns 1973)	PlotCalais04
taxonIdCalais029	phytosociological survey estimating species cardinality (a combiantion of species cover and abundance) in a 10x10m plot	1	Category Species cardinality	2008-10-21T09:26Z	Estimating species cardinality using Wilmanns cover-abundance scale (Wilmanns 1973)	PlotCalais04
taxonIdCalais031	phytosociological survey estimating species cardinality (a combiantion of species cover and abundance) in a 10x10m plot	1	Category Species cardinality	2008-10-21T09:26Z	Estimating species cardinality using Wilmanns cover-abundance scale (Wilmanns 1973)	PlotCalais04
taxonIdCalais034	phytosociological survey estimating species cardinality (a combiantion of species cover and abundance) in a 10x10m plot	1	Category Species cardinality	2008-10-21T09:26Z	Estimating species cardinality using Wilmanns cover-abundance scale (Wilmanns 1973)	PlotCalais04
taxonIdCalais035	phytosociological survey estimating species cardinality (a combiantion of species cover and abundance) in a 10x10m plot	2b	Category Species cardinality	2008-10-21T09:26Z	Estimating species cardinality using Wilmanns cover-abundance scale (Wilmanns 1973)	PlotCalais04
taxonIdCalais044	phytosociological survey estimating species cardinality (a combiantion of species cover and abundance) in a 10x10m plot	+	Category Species cardinality	2008-10-21T09:26Z	Estimating species cardinality using Wilmanns cover-abundance scale (Wilmanns 1973)	PlotCalais04
taxonIdCalais047	phytosociological survey estimating species cardinality (a combiantion of species cover and abundance) in a 10x10m plot	r	Category Species cardinality	2008-10-21T09:26Z	Estimating species cardinality using Wilmanns cover-abundance scale (Wilmanns 1973)	PlotCalais04
taxonIdCalais052	phytosociological survey estimating species cardinality (a combiantion of species cover and abundance) in a 10x10m plot	r	Category Species cardinality	2008-10-21T09:26Z	Estimating species cardinality using Wilmanns cover-abundance scale (Wilmanns 1973)	PlotCalais04
taxonIdCalais053	phytosociological survey estimating species cardinality (a combiantion of species cover and abundance) in a 10x10m plot	r	Category Species cardinality	2008-10-21T09:26Z	Estimating species cardinality using Wilmanns cover-abundance scale (Wilmanns 1973)	PlotCalais04
taxonIdCalais058	phytosociological survey estimating species cardinality (a combiantion of species cover and abundance) in a 10x10m plot	r	Category Species cardinality	2008-10-21T09:26Z	Estimating species cardinality using Wilmanns cover-abundance scale (Wilmanns 1973)	PlotCalais04
taxonIdCalais063	phytosociological survey estimating species cardinality (a combiantion of species cover and abundance) in a 10x10m plot	+	Category Species cardinality	2008-10-21T09:26Z	Estimating species cardinality using Wilmanns cover-abundance scale (Wilmanns 1973)	PlotCalais04
taxonIdCalais073	phytosociological survey estimating species cardinality (a combiantion of species cover and abundance) in a 10x10m plot	r	Category Species cardinality	2008-10-21T09:26Z	Estimating species cardinality using Wilmanns cover-abundance scale (Wilmanns 1973)	PlotCalais04
taxonIdCalais074	phytosociological survey estimating species cardinality (a combiantion of species cover and abundance) in a 10x10m plot	1	Category Species cardinality	2008-10-21T09:26Z	Estimating species cardinality using Wilmanns cover-abundance scale (Wilmanns 1973)	PlotCalais04
taxonIdCalais076	phytosociological survey estimating species cardinality (a combiantion of species cover and abundance) in a 10x10m plot	1	Category Species cardinality	2008-10-21T09:26Z	Estimating species cardinality using Wilmanns cover-abundance scale (Wilmanns 1973)	PlotCalais04
taxonIdCalais081	phytosociological survey estimating species cardinality (a combiantion of species cover and abundance) in a 10x10m plot	3	Category Species cardinality	2008-10-21T09:26Z	Estimating species cardinality using Wilmanns cover-abundance scale (Wilmanns 1973)	PlotCalais04
taxonIdCalais084	phytosociological survey estimating species cardinality (a combiantion of species cover and abundance) in a 10x10m plot	1	Category Species cardinality	2008-10-21T09:26Z	Estimating species cardinality using Wilmanns cover-abundance scale (Wilmanns 1973)	PlotCalais04
taxonIdCalais088	phytosociological survey estimating species cardinality (a combiantion of species cover and abundance) in a 10x10m plot	1	Category Species cardinality	2008-10-21T09:26Z	Estimating species cardinality using Wilmanns cover-abundance scale (Wilmanns 1973)	PlotCalais04
taxonIdCalais092	phytosociological survey estimating species cardinality (a combiantion of species cover and abundance) in a 10x10m plot	2m	Category Species cardinality	2008-10-21T09:26Z	Estimating species cardinality using Wilmanns cover-abundance scale (Wilmanns 1973)	PlotCalais04
taxonIdCalais093	phytosociological survey estimating species cardinality (a combiantion of species cover and abundance) in a 10x10m plot	2m	Category Species cardinality	2008-10-21T09:26Z	Estimating species cardinality using Wilmanns cover-abundance scale (Wilmanns 1973)	PlotCalais04
taxonIdCalais095	phytosociological survey estimating species cardinality (a combiantion of species cover and abundance) in a 10x10m plot	1	Category Species cardinality	2008-10-21T09:26Z	Estimating species cardinality using Wilmanns cover-abundance scale (Wilmanns 1973)	PlotCalais04
taxonIdCalais097	phytosociological survey estimating species cardinality (a combiantion of species cover and abundance) in a 10x10m plot	1	Category Species cardinality	2008-10-21T09:26Z	Estimating species cardinality using Wilmanns cover-abundance scale (Wilmanns 1973)	PlotCalais04
taxonIdCalais098	phytosociological survey estimating species cardinality (a combiantion of species cover and abundance) in a 10x10m plot	1	Category Species cardinality	2008-10-21T09:26Z	Estimating species cardinality using Wilmanns cover-abundance scale (Wilmanns 1973)	PlotCalais04
taxonIdCalais100	phytosociological survey estimating species cardinality (a combiantion of species cover and abundance) in a 10x10m plot	1	Category Species cardinality	2008-10-21T09:26Z	Estimating species cardinality using Wilmanns cover-abundance scale (Wilmanns 1973)	PlotCalais04
taxonIdCalais103	phytosociological survey estimating species cardinality (a combiantion of species cover and abundance) in a 10x10m plot	r	Category Species cardinality	2008-10-21T09:26Z	Estimating species cardinality using Wilmanns cover-abundance scale (Wilmanns 1973)	PlotCalais04
taxonIdCalais104	phytosociological survey estimating species cardinality (a combiantion of species cover and abundance) in a 10x10m plot	2a	Category Species cardinality	2008-10-21T09:26Z	Estimating species cardinality using Wilmanns cover-abundance scale (Wilmanns 1973)	PlotCalais04
taxonIdCalais105	phytosociological survey estimating species cardinality (a combiantion of species cover and abundance) in a 10x10m plot	1	Category Species cardinality	2008-10-21T09:26Z	Estimating species cardinality using Wilmanns cover-abundance scale (Wilmanns 1973)	PlotCalais04
taxonIdCalais106	phytosociological survey estimating species cardinality (a combiantion of species cover and abundance) in a 10x10m plot	+	Category Species cardinality	2008-10-21T09:26Z	Estimating species cardinality using Wilmanns cover-abundance scale (Wilmanns 1973)	PlotCalais04
taxonIdCalais107	phytosociological survey estimating species cardinality (a combiantion of species cover and abundance) in a 10x10m plot	r	Category Species cardinality	2008-10-21T09:26Z	Estimating species cardinality using Wilmanns cover-abundance scale (Wilmanns 1973)	PlotCalais04
taxonIdCalais001	phytosociological survey estimating species cardinality (a combiantion of species cover and abundance) in a 10x10m plot	r	Category Species cardinality	2008-10-21T09:26Z	Estimating species cardinality using Wilmanns cover-abundance scale (Wilmanns 1973)	PlotCalais05
taxonIdCalais005	phytosociological survey estimating species cardinality (a combiantion of species cover and abundance) in a 10x10m plot	r	Category Species cardinality	2008-10-21T09:26Z	Estimating species cardinality using Wilmanns cover-abundance scale (Wilmanns 1973)	PlotCalais05
taxonIdCalais010	phytosociological survey estimating species cardinality (a combiantion of species cover and abundance) in a 10x10m plot	1	Category Species cardinality	2008-10-21T09:26Z	Estimating species cardinality using Wilmanns cover-abundance scale (Wilmanns 1973)	PlotCalais05
taxonIdCalais015	phytosociological survey estimating species cardinality (a combiantion of species cover and abundance) in a 10x10m plot	1	Category Species cardinality	2008-10-21T09:26Z	Estimating species cardinality using Wilmanns cover-abundance scale (Wilmanns 1973)	PlotCalais05
taxonIdCalais018	phytosociological survey estimating species cardinality (a combiantion of species cover and abundance) in a 10x10m plot	1	Category Species cardinality	2008-10-21T09:26Z	Estimating species cardinality using Wilmanns cover-abundance scale (Wilmanns 1973)	PlotCalais05
taxonIdCalais022	phytosociological survey estimating species cardinality (a combiantion of species cover and abundance) in a 10x10m plot	2m	Category Species cardinality	2008-10-21T09:26Z	Estimating species cardinality using Wilmanns cover-abundance scale (Wilmanns 1973)	PlotCalais05
taxonIdCalais026	phytosociological survey estimating species cardinality (a combiantion of species cover and abundance) in a 10x10m plot	1	Category Species cardinality	2008-10-21T09:26Z	Estimating species cardinality using Wilmanns cover-abundance scale (Wilmanns 1973)	PlotCalais05
taxonIdCalais035	phytosociological survey estimating species cardinality (a combiantion of species cover and abundance) in a 10x10m plot	2m	Category Species cardinality	2008-10-21T09:26Z	Estimating species cardinality using Wilmanns cover-abundance scale (Wilmanns 1973)	PlotCalais05
taxonIdCalais039	phytosociological survey estimating species cardinality (a combiantion of species cover and abundance) in a 10x10m plot	r	Category Species cardinality	2008-10-21T09:26Z	Estimating species cardinality using Wilmanns cover-abundance scale (Wilmanns 1973)	PlotCalais05
taxonIdCalais048	phytosociological survey estimating species cardinality (a combiantion of species cover and abundance) in a 10x10m plot	2a	Category Species cardinality	2008-10-21T09:26Z	Estimating species cardinality using Wilmanns cover-abundance scale (Wilmanns 1973)	PlotCalais05
taxonIdCalais049	phytosociological survey estimating species cardinality (a combiantion of species cover and abundance) in a 10x10m plot	2m	Category Species cardinality	2008-10-21T09:26Z	Estimating species cardinality using Wilmanns cover-abundance scale (Wilmanns 1973)	PlotCalais05
taxonIdCalais063	phytosociological survey estimating species cardinality (a combiantion of species cover and abundance) in a 10x10m plot	+	Category Species cardinality	2008-10-21T09:26Z	Estimating species cardinality using Wilmanns cover-abundance scale (Wilmanns 1973)	PlotCalais05
taxonIdCalais074	phytosociological survey estimating species cardinality (a combiantion of species cover and abundance) in a 10x10m plot	1	Category Species cardinality	2008-10-21T09:26Z	Estimating species cardinality using Wilmanns cover-abundance scale (Wilmanns 1973)	PlotCalais05
taxonIdCalais077	phytosociological survey estimating species cardinality (a combiantion of species cover and abundance) in a 10x10m plot	2a	Category Species cardinality	2008-10-21T09:26Z	Estimating species cardinality using Wilmanns cover-abundance scale (Wilmanns 1973)	PlotCalais05
taxonIdCalais083	phytosociological survey estimating species cardinality (a combiantion of species cover and abundance) in a 10x10m plot	2a	Category Species cardinality	2008-10-21T09:26Z	Estimating species cardinality using Wilmanns cover-abundance scale (Wilmanns 1973)	PlotCalais05
taxonIdCalais086	phytosociological survey estimating species cardinality (a combiantion of species cover and abundance) in a 10x10m plot	+	Category Species cardinality	2008-10-21T09:26Z	Estimating species cardinality using Wilmanns cover-abundance scale (Wilmanns 1973)	PlotCalais05
taxonIdCalais097	phytosociological survey estimating species cardinality (a combiantion of species cover and abundance) in a 10x10m plot	1	Category Species cardinality	2008-10-21T09:26Z	Estimating species cardinality using Wilmanns cover-abundance scale (Wilmanns 1973)	PlotCalais05
taxonIdCalais098	phytosociological survey estimating species cardinality (a combiantion of species cover and abundance) in a 10x10m plot	+	Category Species cardinality	2008-10-21T09:26Z	Estimating species cardinality using Wilmanns cover-abundance scale (Wilmanns 1973)	PlotCalais05
taxonIdCalais100	phytosociological survey estimating species cardinality (a combiantion of species cover and abundance) in a 10x10m plot	1	Category Species cardinality	2008-10-21T09:26Z	Estimating species cardinality using Wilmanns cover-abundance scale (Wilmanns 1973)	PlotCalais05
taxonIdCalais104	phytosociological survey estimating species cardinality (a combiantion of species cover and abundance) in a 10x10m plot	2m	Category Species cardinality	2008-10-21T09:26Z	Estimating species cardinality using Wilmanns cover-abundance scale (Wilmanns 1973)	PlotCalais05
taxonIdCalais105	phytosociological survey estimating species cardinality (a combiantion of species cover and abundance) in a 10x10m plot	1	Category Species cardinality	2008-10-21T09:26Z	Estimating species cardinality using Wilmanns cover-abundance scale (Wilmanns 1973)	PlotCalais05
taxonIdCalais007	phytosociological survey estimating species cardinality (a combiantion of species cover and abundance) in a 10x10m plot	1	Category Species cardinality	2008-10-21T09:26Z	Estimating species cardinality using Wilmanns cover-abundance scale (Wilmanns 1973)	PlotCalais06
taxonIdCalais008	phytosociological survey estimating species cardinality (a combiantion of species cover and abundance) in a 10x10m plot	r	Category Species cardinality	2008-10-21T09:26Z	Estimating species cardinality using Wilmanns cover-abundance scale (Wilmanns 1973)	PlotCalais06
taxonIdCalais011	phytosociological survey estimating species cardinality (a combiantion of species cover and abundance) in a 10x10m plot	1	Category Species cardinality	2008-10-21T09:26Z	Estimating species cardinality using Wilmanns cover-abundance scale (Wilmanns 1973)	PlotCalais06
taxonIdCalais014	phytosociological survey estimating species cardinality (a combiantion of species cover and abundance) in a 10x10m plot	r	Category Species cardinality	2008-10-21T09:26Z	Estimating species cardinality using Wilmanns cover-abundance scale (Wilmanns 1973)	PlotCalais06
taxonIdCalais022	phytosociological survey estimating species cardinality (a combiantion of species cover and abundance) in a 10x10m plot	1	Category Species cardinality	2008-10-21T09:26Z	Estimating species cardinality using Wilmanns cover-abundance scale (Wilmanns 1973)	PlotCalais06
taxonIdCalais024	phytosociological survey estimating species cardinality (a combiantion of species cover and abundance) in a 10x10m plot	2a	Category Species cardinality	2008-10-21T09:26Z	Estimating species cardinality using Wilmanns cover-abundance scale (Wilmanns 1973)	PlotCalais06
taxonIdCalais028	phytosociological survey estimating species cardinality (a combiantion of species cover and abundance) in a 10x10m plot	1	Category Species cardinality	2008-10-21T09:26Z	Estimating species cardinality using Wilmanns cover-abundance scale (Wilmanns 1973)	PlotCalais06
taxonIdCalais034	phytosociological survey estimating species cardinality (a combiantion of species cover and abundance) in a 10x10m plot	1	Category Species cardinality	2008-10-21T09:26Z	Estimating species cardinality using Wilmanns cover-abundance scale (Wilmanns 1973)	PlotCalais06
taxonIdCalais036	phytosociological survey estimating species cardinality (a combiantion of species cover and abundance) in a 10x10m plot	2m	Category Species cardinality	2008-10-21T09:26Z	Estimating species cardinality using Wilmanns cover-abundance scale (Wilmanns 1973)	PlotCalais06
taxonIdCalais040	phytosociological survey estimating species cardinality (a combiantion of species cover and abundance) in a 10x10m plot	+	Category Species cardinality	2008-10-21T09:26Z	Estimating species cardinality using Wilmanns cover-abundance scale (Wilmanns 1973)	PlotCalais06
taxonIdCalais041	phytosociological survey estimating species cardinality (a combiantion of species cover and abundance) in a 10x10m plot	+	Category Species cardinality	2008-10-21T09:26Z	Estimating species cardinality using Wilmanns cover-abundance scale (Wilmanns 1973)	PlotCalais06
taxonIdCalais044	phytosociological survey estimating species cardinality (a combiantion of species cover and abundance) in a 10x10m plot	r	Category Species cardinality	2008-10-21T09:26Z	Estimating species cardinality using Wilmanns cover-abundance scale (Wilmanns 1973)	PlotCalais06
taxonIdCalais049	phytosociological survey estimating species cardinality (a combiantion of species cover and abundance) in a 10x10m plot	r	Category Species cardinality	2008-10-21T09:26Z	Estimating species cardinality using Wilmanns cover-abundance scale (Wilmanns 1973)	PlotCalais06
taxonIdCalais052	phytosociological survey estimating species cardinality (a combiantion of species cover and abundance) in a 10x10m plot	r	Category Species cardinality	2008-10-21T09:26Z	Estimating species cardinality using Wilmanns cover-abundance scale (Wilmanns 1973)	PlotCalais06
taxonIdCalais062	phytosociological survey estimating species cardinality (a combiantion of species cover and abundance) in a 10x10m plot	+	Category Species cardinality	2008-10-21T09:26Z	Estimating species cardinality using Wilmanns cover-abundance scale (Wilmanns 1973)	PlotCalais06
taxonIdCalais066	phytosociological survey estimating species cardinality (a combiantion of species cover and abundance) in a 10x10m plot	+	Category Species cardinality	2008-10-21T09:26Z	Estimating species cardinality using Wilmanns cover-abundance scale (Wilmanns 1973)	PlotCalais06
taxonIdCalais068	phytosociological survey estimating species cardinality (a combiantion of species cover and abundance) in a 10x10m plot	+	Category Species cardinality	2008-10-21T09:26Z	Estimating species cardinality using Wilmanns cover-abundance scale (Wilmanns 1973)	PlotCalais06
taxonIdCalais069	phytosociological survey estimating species cardinality (a combiantion of species cover and abundance) in a 10x10m plot	1	Category Species cardinality	2008-10-21T09:26Z	Estimating species cardinality using Wilmanns cover-abundance scale (Wilmanns 1973)	PlotCalais06
taxonIdCalais074	phytosociological survey estimating species cardinality (a combiantion of species cover and abundance) in a 10x10m plot	2m	Category Species cardinality	2008-10-21T09:26Z	Estimating species cardinality using Wilmanns cover-abundance scale (Wilmanns 1973)	PlotCalais06
taxonIdCalais076	phytosociological survey estimating species cardinality (a combiantion of species cover and abundance) in a 10x10m plot	2m	Category Species cardinality	2008-10-21T09:26Z	Estimating species cardinality using Wilmanns cover-abundance scale (Wilmanns 1973)	PlotCalais06
taxonIdCalais078	phytosociological survey estimating species cardinality (a combiantion of species cover and abundance) in a 10x10m plot	2m	Category Species cardinality	2008-10-21T09:26Z	Estimating species cardinality using Wilmanns cover-abundance scale (Wilmanns 1973)	PlotCalais06
taxonIdCalais079	phytosociological survey estimating species cardinality (a combiantion of species cover and abundance) in a 10x10m plot	1	Category Species cardinality	2008-10-21T09:26Z	Estimating species cardinality using Wilmanns cover-abundance scale (Wilmanns 1973)	PlotCalais06
taxonIdCalais081	phytosociological survey estimating species cardinality (a combiantion of species cover and abundance) in a 10x10m plot	3	Category Species cardinality	2008-10-21T09:26Z	Estimating species cardinality using Wilmanns cover-abundance scale (Wilmanns 1973)	PlotCalais06
taxonIdCalais082	phytosociological survey estimating species cardinality (a combiantion of species cover and abundance) in a 10x10m plot	1	Category Species cardinality	2008-10-21T09:26Z	Estimating species cardinality using Wilmanns cover-abundance scale (Wilmanns 1973)	PlotCalais06
taxonIdCalais089	phytosociological survey estimating species cardinality (a combiantion of species cover and abundance) in a 10x10m plot	2a	Category Species cardinality	2008-10-21T09:26Z	Estimating species cardinality using Wilmanns cover-abundance scale (Wilmanns 1973)	PlotCalais06
taxonIdCalais091	phytosociological survey estimating species cardinality (a combiantion of species cover and abundance) in a 10x10m plot	1	Category Species cardinality	2008-10-21T09:26Z	Estimating species cardinality using Wilmanns cover-abundance scale (Wilmanns 1973)	PlotCalais06
taxonIdCalais097	phytosociological survey estimating species cardinality (a combiantion of species cover and abundance) in a 10x10m plot	+	Category Species cardinality	2008-10-21T09:26Z	Estimating species cardinality using Wilmanns cover-abundance scale (Wilmanns 1973)	PlotCalais06
taxonIdCalais100	phytosociological survey estimating species cardinality (a combiantion of species cover and abundance) in a 10x10m plot	+	Category Species cardinality	2008-10-21T09:26Z	Estimating species cardinality using Wilmanns cover-abundance scale (Wilmanns 1973)	PlotCalais06
taxonIdCalais007	phytosociological survey estimating species cardinality (a combiantion of species cover and abundance) in a 10x10m plot	+	Category Species cardinality	2008-10-21T09:26Z	Estimating species cardinality using Wilmanns cover-abundance scale (Wilmanns 1973)	PlotCalais07
taxonIdCalais008	phytosociological survey estimating species cardinality (a combiantion of species cover and abundance) in a 10x10m plot	r	Category Species cardinality	2008-10-21T09:26Z	Estimating species cardinality using Wilmanns cover-abundance scale (Wilmanns 1973)	PlotCalais07
taxonIdCalais010	phytosociological survey estimating species cardinality (a combiantion of species cover and abundance) in a 10x10m plot	2a	Category Species cardinality	2008-10-21T09:26Z	Estimating species cardinality using Wilmanns cover-abundance scale (Wilmanns 1973)	PlotCalais07
taxonIdCalais011	phytosociological survey estimating species cardinality (a combiantion of species cover and abundance) in a 10x10m plot	1	Category Species cardinality	2008-10-21T09:26Z	Estimating species cardinality using Wilmanns cover-abundance scale (Wilmanns 1973)	PlotCalais07
taxonIdCalais013	phytosociological survey estimating species cardinality (a combiantion of species cover and abundance) in a 10x10m plot	r	Category Species cardinality	2008-10-21T09:26Z	Estimating species cardinality using Wilmanns cover-abundance scale (Wilmanns 1973)	PlotCalais07
taxonIdCalais014	phytosociological survey estimating species cardinality (a combiantion of species cover and abundance) in a 10x10m plot	+	Category Species cardinality	2008-10-21T09:26Z	Estimating species cardinality using Wilmanns cover-abundance scale (Wilmanns 1973)	PlotCalais07
taxonIdCalais016	phytosociological survey estimating species cardinality (a combiantion of species cover and abundance) in a 10x10m plot	+	Category Species cardinality	2008-10-21T09:26Z	Estimating species cardinality using Wilmanns cover-abundance scale (Wilmanns 1973)	PlotCalais07
taxonIdCalais020	phytosociological survey estimating species cardinality (a combiantion of species cover and abundance) in a 10x10m plot	+	Category Species cardinality	2008-10-21T09:26Z	Estimating species cardinality using Wilmanns cover-abundance scale (Wilmanns 1973)	PlotCalais07
taxonIdCalais022	phytosociological survey estimating species cardinality (a combiantion of species cover and abundance) in a 10x10m plot	2a	Category Species cardinality	2008-10-21T09:26Z	Estimating species cardinality using Wilmanns cover-abundance scale (Wilmanns 1973)	PlotCalais07
taxonIdCalais026	phytosociological survey estimating species cardinality (a combiantion of species cover and abundance) in a 10x10m plot	r	Category Species cardinality	2008-10-21T09:26Z	Estimating species cardinality using Wilmanns cover-abundance scale (Wilmanns 1973)	PlotCalais07
taxonIdCalais034	phytosociological survey estimating species cardinality (a combiantion of species cover and abundance) in a 10x10m plot	2m	Category Species cardinality	2008-10-21T09:26Z	Estimating species cardinality using Wilmanns cover-abundance scale (Wilmanns 1973)	PlotCalais07
taxonIdCalais036	phytosociological survey estimating species cardinality (a combiantion of species cover and abundance) in a 10x10m plot	1	Category Species cardinality	2008-10-21T09:26Z	Estimating species cardinality using Wilmanns cover-abundance scale (Wilmanns 1973)	PlotCalais07
taxonIdCalais038	phytosociological survey estimating species cardinality (a combiantion of species cover and abundance) in a 10x10m plot	+	Category Species cardinality	2008-10-21T09:26Z	Estimating species cardinality using Wilmanns cover-abundance scale (Wilmanns 1973)	PlotCalais07
taxonIdCalais040	phytosociological survey estimating species cardinality (a combiantion of species cover and abundance) in a 10x10m plot	+	Category Species cardinality	2008-10-21T09:26Z	Estimating species cardinality using Wilmanns cover-abundance scale (Wilmanns 1973)	PlotCalais07
taxonIdCalais041	phytosociological survey estimating species cardinality (a combiantion of species cover and abundance) in a 10x10m plot	+	Category Species cardinality	2008-10-21T09:26Z	Estimating species cardinality using Wilmanns cover-abundance scale (Wilmanns 1973)	PlotCalais07
taxonIdCalais049	phytosociological survey estimating species cardinality (a combiantion of species cover and abundance) in a 10x10m plot	1	Category Species cardinality	2008-10-21T09:26Z	Estimating species cardinality using Wilmanns cover-abundance scale (Wilmanns 1973)	PlotCalais07
taxonIdCalais056	phytosociological survey estimating species cardinality (a combiantion of species cover and abundance) in a 10x10m plot	r	Category Species cardinality	2008-10-21T09:26Z	Estimating species cardinality using Wilmanns cover-abundance scale (Wilmanns 1973)	PlotCalais07
taxonIdCalais062	phytosociological survey estimating species cardinality (a combiantion of species cover and abundance) in a 10x10m plot	+	Category Species cardinality	2008-10-21T09:26Z	Estimating species cardinality using Wilmanns cover-abundance scale (Wilmanns 1973)	PlotCalais07
taxonIdCalais066	phytosociological survey estimating species cardinality (a combiantion of species cover and abundance) in a 10x10m plot	+	Category Species cardinality	2008-10-21T09:26Z	Estimating species cardinality using Wilmanns cover-abundance scale (Wilmanns 1973)	PlotCalais07
taxonIdCalais067	phytosociological survey estimating species cardinality (a combiantion of species cover and abundance) in a 10x10m plot	r	Category Species cardinality	2008-10-21T09:26Z	Estimating species cardinality using Wilmanns cover-abundance scale (Wilmanns 1973)	PlotCalais07
taxonIdCalais068	phytosociological survey estimating species cardinality (a combiantion of species cover and abundance) in a 10x10m plot	r	Category Species cardinality	2008-10-21T09:26Z	Estimating species cardinality using Wilmanns cover-abundance scale (Wilmanns 1973)	PlotCalais07
taxonIdCalais069	phytosociological survey estimating species cardinality (a combiantion of species cover and abundance) in a 10x10m plot	1	Category Species cardinality	2008-10-21T09:26Z	Estimating species cardinality using Wilmanns cover-abundance scale (Wilmanns 1973)	PlotCalais07
taxonIdCalais070	phytosociological survey estimating species cardinality (a combiantion of species cover and abundance) in a 10x10m plot	+	Category Species cardinality	2008-10-21T09:26Z	Estimating species cardinality using Wilmanns cover-abundance scale (Wilmanns 1973)	PlotCalais07
taxonIdCalais074	phytosociological survey estimating species cardinality (a combiantion of species cover and abundance) in a 10x10m plot	2m	Category Species cardinality	2008-10-21T09:26Z	Estimating species cardinality using Wilmanns cover-abundance scale (Wilmanns 1973)	PlotCalais07
taxonIdCalais076	phytosociological survey estimating species cardinality (a combiantion of species cover and abundance) in a 10x10m plot	2a	Category Species cardinality	2008-10-21T09:26Z	Estimating species cardinality using Wilmanns cover-abundance scale (Wilmanns 1973)	PlotCalais07
taxonIdCalais078	phytosociological survey estimating species cardinality (a combiantion of species cover and abundance) in a 10x10m plot	2m	Category Species cardinality	2008-10-21T09:26Z	Estimating species cardinality using Wilmanns cover-abundance scale (Wilmanns 1973)	PlotCalais07
taxonIdCalais081	phytosociological survey estimating species cardinality (a combiantion of species cover and abundance) in a 10x10m plot	3	Category Species cardinality	2008-10-21T09:26Z	Estimating species cardinality using Wilmanns cover-abundance scale (Wilmanns 1973)	PlotCalais07
taxonIdCalais082	phytosociological survey estimating species cardinality (a combiantion of species cover and abundance) in a 10x10m plot	1	Category Species cardinality	2008-10-21T09:26Z	Estimating species cardinality using Wilmanns cover-abundance scale (Wilmanns 1973)	PlotCalais07
taxonIdCalais083	phytosociological survey estimating species cardinality (a combiantion of species cover and abundance) in a 10x10m plot	2m	Category Species cardinality	2008-10-21T09:26Z	Estimating species cardinality using Wilmanns cover-abundance scale (Wilmanns 1973)	PlotCalais07
taxonIdCalais086	phytosociological survey estimating species cardinality (a combiantion of species cover and abundance) in a 10x10m plot	2m	Category Species cardinality	2008-10-21T09:26Z	Estimating species cardinality using Wilmanns cover-abundance scale (Wilmanns 1973)	PlotCalais07
taxonIdCalais093	phytosociological survey estimating species cardinality (a combiantion of species cover and abundance) in a 10x10m plot	1	Category Species cardinality	2008-10-21T09:26Z	Estimating species cardinality using Wilmanns cover-abundance scale (Wilmanns 1973)	PlotCalais07
taxonIdCalais100	phytosociological survey estimating species cardinality (a combiantion of species cover and abundance) in a 10x10m plot	+	Category Species cardinality	2008-10-21T09:26Z	Estimating species cardinality using Wilmanns cover-abundance scale (Wilmanns 1973)	PlotCalais07
taxonIdCalais010	phytosociological survey estimating species cardinality (a combiantion of species cover and abundance) in a 10x10m plot	1	Category Species cardinality	2008-10-21T09:26Z	Estimating species cardinality using Wilmanns cover-abundance scale (Wilmanns 1973)	PlotCalais08
taxonIdCalais011	phytosociological survey estimating species cardinality (a combiantion of species cover and abundance) in a 10x10m plot	1	Category Species cardinality	2008-10-21T09:26Z	Estimating species cardinality using Wilmanns cover-abundance scale (Wilmanns 1973)	PlotCalais08
taxonIdCalais020	phytosociological survey estimating species cardinality (a combiantion of species cover and abundance) in a 10x10m plot	1	Category Species cardinality	2008-10-21T09:26Z	Estimating species cardinality using Wilmanns cover-abundance scale (Wilmanns 1973)	PlotCalais08
taxonIdCalais022	phytosociological survey estimating species cardinality (a combiantion of species cover and abundance) in a 10x10m plot	1	Category Species cardinality	2008-10-21T09:26Z	Estimating species cardinality using Wilmanns cover-abundance scale (Wilmanns 1973)	PlotCalais08
taxonIdCalais026	phytosociological survey estimating species cardinality (a combiantion of species cover and abundance) in a 10x10m plot	r	Category Species cardinality	2008-10-21T09:26Z	Estimating species cardinality using Wilmanns cover-abundance scale (Wilmanns 1973)	PlotCalais08
taxonIdCalais033	phytosociological survey estimating species cardinality (a combiantion of species cover and abundance) in a 10x10m plot	2a	Category Species cardinality	2008-10-21T09:26Z	Estimating species cardinality using Wilmanns cover-abundance scale (Wilmanns 1973)	PlotCalais08
taxonIdCalais044	phytosociological survey estimating species cardinality (a combiantion of species cover and abundance) in a 10x10m plot	r	Category Species cardinality	2008-10-21T09:26Z	Estimating species cardinality using Wilmanns cover-abundance scale (Wilmanns 1973)	PlotCalais08
taxonIdCalais049	phytosociological survey estimating species cardinality (a combiantion of species cover and abundance) in a 10x10m plot	1	Category Species cardinality	2008-10-21T09:26Z	Estimating species cardinality using Wilmanns cover-abundance scale (Wilmanns 1973)	PlotCalais08
taxonIdCalais056	phytosociological survey estimating species cardinality (a combiantion of species cover and abundance) in a 10x10m plot	+	Category Species cardinality	2008-10-21T09:26Z	Estimating species cardinality using Wilmanns cover-abundance scale (Wilmanns 1973)	PlotCalais08
taxonIdCalais059	phytosociological survey estimating species cardinality (a combiantion of species cover and abundance) in a 10x10m plot	1	Category Species cardinality	2008-10-21T09:26Z	Estimating species cardinality using Wilmanns cover-abundance scale (Wilmanns 1973)	PlotCalais08
taxonIdCalais060	phytosociological survey estimating species cardinality (a combiantion of species cover and abundance) in a 10x10m plot	r	Category Species cardinality	2008-10-21T09:26Z	Estimating species cardinality using Wilmanns cover-abundance scale (Wilmanns 1973)	PlotCalais08
taxonIdCalais065	phytosociological survey estimating species cardinality (a combiantion of species cover and abundance) in a 10x10m plot	r	Category Species cardinality	2008-10-21T09:26Z	Estimating species cardinality using Wilmanns cover-abundance scale (Wilmanns 1973)	PlotCalais08
taxonIdCalais066	phytosociological survey estimating species cardinality (a combiantion of species cover and abundance) in a 10x10m plot	r	Category Species cardinality	2008-10-21T09:26Z	Estimating species cardinality using Wilmanns cover-abundance scale (Wilmanns 1973)	PlotCalais08
taxonIdCalais068	phytosociological survey estimating species cardinality (a combiantion of species cover and abundance) in a 10x10m plot	1	Category Species cardinality	2008-10-21T09:26Z	Estimating species cardinality using Wilmanns cover-abundance scale (Wilmanns 1973)	PlotCalais08
taxonIdCalais069	phytosociological survey estimating species cardinality (a combiantion of species cover and abundance) in a 10x10m plot	1	Category Species cardinality	2008-10-21T09:26Z	Estimating species cardinality using Wilmanns cover-abundance scale (Wilmanns 1973)	PlotCalais08
taxonIdCalais070	phytosociological survey estimating species cardinality (a combiantion of species cover and abundance) in a 10x10m plot	r	Category Species cardinality	2008-10-21T09:26Z	Estimating species cardinality using Wilmanns cover-abundance scale (Wilmanns 1973)	PlotCalais08
taxonIdCalais074	phytosociological survey estimating species cardinality (a combiantion of species cover and abundance) in a 10x10m plot	2a	Category Species cardinality	2008-10-21T09:26Z	Estimating species cardinality using Wilmanns cover-abundance scale (Wilmanns 1973)	PlotCalais08
taxonIdCalais076	phytosociological survey estimating species cardinality (a combiantion of species cover and abundance) in a 10x10m plot	2m	Category Species cardinality	2008-10-21T09:26Z	Estimating species cardinality using Wilmanns cover-abundance scale (Wilmanns 1973)	PlotCalais08
taxonIdCalais078	phytosociological survey estimating species cardinality (a combiantion of species cover and abundance) in a 10x10m plot	2m	Category Species cardinality	2008-10-21T09:26Z	Estimating species cardinality using Wilmanns cover-abundance scale (Wilmanns 1973)	PlotCalais08
taxonIdCalais081	phytosociological survey estimating species cardinality (a combiantion of species cover and abundance) in a 10x10m plot	3	Category Species cardinality	2008-10-21T09:26Z	Estimating species cardinality using Wilmanns cover-abundance scale (Wilmanns 1973)	PlotCalais08
taxonIdCalais083	phytosociological survey estimating species cardinality (a combiantion of species cover and abundance) in a 10x10m plot	1	Category Species cardinality	2008-10-21T09:26Z	Estimating species cardinality using Wilmanns cover-abundance scale (Wilmanns 1973)	PlotCalais08
taxonIdCalais086	phytosociological survey estimating species cardinality (a combiantion of species cover and abundance) in a 10x10m plot	2m	Category Species cardinality	2008-10-21T09:26Z	Estimating species cardinality using Wilmanns cover-abundance scale (Wilmanns 1973)	PlotCalais08
taxonIdCalais092	phytosociological survey estimating species cardinality (a combiantion of species cover and abundance) in a 10x10m plot	1	Category Species cardinality	2008-10-21T09:26Z	Estimating species cardinality using Wilmanns cover-abundance scale (Wilmanns 1973)	PlotCalais08
taxonIdCalais093	phytosociological survey estimating species cardinality (a combiantion of species cover and abundance) in a 10x10m plot	2m	Category Species cardinality	2008-10-21T09:26Z	Estimating species cardinality using Wilmanns cover-abundance scale (Wilmanns 1973)	PlotCalais08
taxonIdCalais100	phytosociological survey estimating species cardinality (a combiantion of species cover and abundance) in a 10x10m plot	+	Category Species cardinality	2008-10-21T09:26Z	Estimating species cardinality using Wilmanns cover-abundance scale (Wilmanns 1973)	PlotCalais08
taxonIdCalais101	phytosociological survey estimating species cardinality (a combiantion of species cover and abundance) in a 10x10m plot	+	Category Species cardinality	2008-10-21T09:26Z	Estimating species cardinality using Wilmanns cover-abundance scale (Wilmanns 1973)	PlotCalais08
taxonIdCalais107	phytosociological survey estimating species cardinality (a combiantion of species cover and abundance) in a 10x10m plot	+	Category Species cardinality	2008-10-21T09:26Z	Estimating species cardinality using Wilmanns cover-abundance scale (Wilmanns 1973)	PlotCalais08
taxonIdCalais002	phytosociological survey estimating species cardinality (a combiantion of species cover and abundance) in a 10x10m plot	r	Category Species cardinality	2008-10-21T09:26Z	Estimating species cardinality using Wilmanns cover-abundance scale (Wilmanns 1973)	PlotCalais09
taxonIdCalais005	phytosociological survey estimating species cardinality (a combiantion of species cover and abundance) in a 10x10m plot	+	Category Species cardinality	2008-10-21T09:26Z	Estimating species cardinality using Wilmanns cover-abundance scale (Wilmanns 1973)	PlotCalais09
taxonIdCalais006	phytosociological survey estimating species cardinality (a combiantion of species cover and abundance) in a 10x10m plot	1	Category Species cardinality	2008-10-21T09:26Z	Estimating species cardinality using Wilmanns cover-abundance scale (Wilmanns 1973)	PlotCalais09
taxonIdCalais008	phytosociological survey estimating species cardinality (a combiantion of species cover and abundance) in a 10x10m plot	+	Category Species cardinality	2008-10-21T09:26Z	Estimating species cardinality using Wilmanns cover-abundance scale (Wilmanns 1973)	PlotCalais09
taxonIdCalais010	phytosociological survey estimating species cardinality (a combiantion of species cover and abundance) in a 10x10m plot	+	Category Species cardinality	2008-10-21T09:26Z	Estimating species cardinality using Wilmanns cover-abundance scale (Wilmanns 1973)	PlotCalais09
taxonIdCalais011	phytosociological survey estimating species cardinality (a combiantion of species cover and abundance) in a 10x10m plot	1	Category Species cardinality	2008-10-21T09:26Z	Estimating species cardinality using Wilmanns cover-abundance scale (Wilmanns 1973)	PlotCalais09
taxonIdCalais016	phytosociological survey estimating species cardinality (a combiantion of species cover and abundance) in a 10x10m plot	r	Category Species cardinality	2008-10-21T09:26Z	Estimating species cardinality using Wilmanns cover-abundance scale (Wilmanns 1973)	PlotCalais09
taxonIdCalais019	phytosociological survey estimating species cardinality (a combiantion of species cover and abundance) in a 10x10m plot	2a	Category Species cardinality	2008-10-21T09:26Z	Estimating species cardinality using Wilmanns cover-abundance scale (Wilmanns 1973)	PlotCalais09
taxonIdCalais020	phytosociological survey estimating species cardinality (a combiantion of species cover and abundance) in a 10x10m plot	+	Category Species cardinality	2008-10-21T09:26Z	Estimating species cardinality using Wilmanns cover-abundance scale (Wilmanns 1973)	PlotCalais09
taxonIdCalais022	phytosociological survey estimating species cardinality (a combiantion of species cover and abundance) in a 10x10m plot	+	Category Species cardinality	2008-10-21T09:26Z	Estimating species cardinality using Wilmanns cover-abundance scale (Wilmanns 1973)	PlotCalais09
taxonIdCalais023	phytosociological survey estimating species cardinality (a combiantion of species cover and abundance) in a 10x10m plot	+	Category Species cardinality	2008-10-21T09:26Z	Estimating species cardinality using Wilmanns cover-abundance scale (Wilmanns 1973)	PlotCalais09
taxonIdCalais034	phytosociological survey estimating species cardinality (a combiantion of species cover and abundance) in a 10x10m plot	1	Category Species cardinality	2008-10-21T09:26Z	Estimating species cardinality using Wilmanns cover-abundance scale (Wilmanns 1973)	PlotCalais09
taxonIdCalais041	phytosociological survey estimating species cardinality (a combiantion of species cover and abundance) in a 10x10m plot	1	Category Species cardinality	2008-10-21T09:26Z	Estimating species cardinality using Wilmanns cover-abundance scale (Wilmanns 1973)	PlotCalais09
taxonIdCalais049	phytosociological survey estimating species cardinality (a combiantion of species cover and abundance) in a 10x10m plot	+	Category Species cardinality	2008-10-21T09:26Z	Estimating species cardinality using Wilmanns cover-abundance scale (Wilmanns 1973)	PlotCalais09
taxonIdCalais051	phytosociological survey estimating species cardinality (a combiantion of species cover and abundance) in a 10x10m plot	r	Category Species cardinality	2008-10-21T09:26Z	Estimating species cardinality using Wilmanns cover-abundance scale (Wilmanns 1973)	PlotCalais09
taxonIdCalais054	phytosociological survey estimating species cardinality (a combiantion of species cover and abundance) in a 10x10m plot	+	Category Species cardinality	2008-10-21T09:26Z	Estimating species cardinality using Wilmanns cover-abundance scale (Wilmanns 1973)	PlotCalais09
taxonIdCalais056	phytosociological survey estimating species cardinality (a combiantion of species cover and abundance) in a 10x10m plot	+	Category Species cardinality	2008-10-21T09:26Z	Estimating species cardinality using Wilmanns cover-abundance scale (Wilmanns 1973)	PlotCalais09
taxonIdCalais059	phytosociological survey estimating species cardinality (a combiantion of species cover and abundance) in a 10x10m plot	1	Category Species cardinality	2008-10-21T09:26Z	Estimating species cardinality using Wilmanns cover-abundance scale (Wilmanns 1973)	PlotCalais09
taxonIdCalais062	phytosociological survey estimating species cardinality (a combiantion of species cover and abundance) in a 10x10m plot	r	Category Species cardinality	2008-10-21T09:26Z	Estimating species cardinality using Wilmanns cover-abundance scale (Wilmanns 1973)	PlotCalais09
taxonIdCalais064	phytosociological survey estimating species cardinality (a combiantion of species cover and abundance) in a 10x10m plot	+	Category Species cardinality	2008-10-21T09:26Z	Estimating species cardinality using Wilmanns cover-abundance scale (Wilmanns 1973)	PlotCalais09
taxonIdCalais066	phytosociological survey estimating species cardinality (a combiantion of species cover and abundance) in a 10x10m plot	1	Category Species cardinality	2008-10-21T09:26Z	Estimating species cardinality using Wilmanns cover-abundance scale (Wilmanns 1973)	PlotCalais09
taxonIdCalais067	phytosociological survey estimating species cardinality (a combiantion of species cover and abundance) in a 10x10m plot	+	Category Species cardinality	2008-10-21T09:26Z	Estimating species cardinality using Wilmanns cover-abundance scale (Wilmanns 1973)	PlotCalais09
taxonIdCalais074	phytosociological survey estimating species cardinality (a combiantion of species cover and abundance) in a 10x10m plot	1	Category Species cardinality	2008-10-21T09:26Z	Estimating species cardinality using Wilmanns cover-abundance scale (Wilmanns 1973)	PlotCalais09
taxonIdCalais075	phytosociological survey estimating species cardinality (a combiantion of species cover and abundance) in a 10x10m plot	1	Category Species cardinality	2008-10-21T09:26Z	Estimating species cardinality using Wilmanns cover-abundance scale (Wilmanns 1973)	PlotCalais09
taxonIdCalais078	phytosociological survey estimating species cardinality (a combiantion of species cover and abundance) in a 10x10m plot	2m	Category Species cardinality	2008-10-21T09:26Z	Estimating species cardinality using Wilmanns cover-abundance scale (Wilmanns 1973)	PlotCalais09
taxonIdCalais081	phytosociological survey estimating species cardinality (a combiantion of species cover and abundance) in a 10x10m plot	3	Category Species cardinality	2008-10-21T09:26Z	Estimating species cardinality using Wilmanns cover-abundance scale (Wilmanns 1973)	PlotCalais09
taxonIdCalais083	phytosociological survey estimating species cardinality (a combiantion of species cover and abundance) in a 10x10m plot	2m	Category Species cardinality	2008-10-21T09:26Z	Estimating species cardinality using Wilmanns cover-abundance scale (Wilmanns 1973)	PlotCalais09
taxonIdCalais086	phytosociological survey estimating species cardinality (a combiantion of species cover and abundance) in a 10x10m plot	1	Category Species cardinality	2008-10-21T09:26Z	Estimating species cardinality using Wilmanns cover-abundance scale (Wilmanns 1973)	PlotCalais09
taxonIdCalais088	phytosociological survey estimating species cardinality (a combiantion of species cover and abundance) in a 10x10m plot	2a	Category Species cardinality	2008-10-21T09:26Z	Estimating species cardinality using Wilmanns cover-abundance scale (Wilmanns 1973)	PlotCalais09
taxonIdCalais089	phytosociological survey estimating species cardinality (a combiantion of species cover and abundance) in a 10x10m plot	2m	Category Species cardinality	2008-10-21T09:26Z	Estimating species cardinality using Wilmanns cover-abundance scale (Wilmanns 1973)	PlotCalais09
taxonIdCalais093	phytosociological survey estimating species cardinality (a combiantion of species cover and abundance) in a 10x10m plot	2m	Category Species cardinality	2008-10-21T09:26Z	Estimating species cardinality using Wilmanns cover-abundance scale (Wilmanns 1973)	PlotCalais09
taxonIdCalais094	phytosociological survey estimating species cardinality (a combiantion of species cover and abundance) in a 10x10m plot	r	Category Species cardinality	2008-10-21T09:26Z	Estimating species cardinality using Wilmanns cover-abundance scale (Wilmanns 1973)	PlotCalais09
taxonIdCalais097	phytosociological survey estimating species cardinality (a combiantion of species cover and abundance) in a 10x10m plot	+	Category Species cardinality	2008-10-21T09:26Z	Estimating species cardinality using Wilmanns cover-abundance scale (Wilmanns 1973)	PlotCalais09
taxonIdCalais100	phytosociological survey estimating species cardinality (a combiantion of species cover and abundance) in a 10x10m plot	+	Category Species cardinality	2008-10-21T09:26Z	Estimating species cardinality using Wilmanns cover-abundance scale (Wilmanns 1973)	PlotCalais09
taxonIdCalais101	phytosociological survey estimating species cardinality (a combiantion of species cover and abundance) in a 10x10m plot	1	Category Species cardinality	2008-10-21T09:26Z	Estimating species cardinality using Wilmanns cover-abundance scale (Wilmanns 1973)	PlotCalais09
taxonIdCalais104	phytosociological survey estimating species cardinality (a combiantion of species cover and abundance) in a 10x10m plot	2m	Category Species cardinality	2008-10-21T09:26Z	Estimating species cardinality using Wilmanns cover-abundance scale (Wilmanns 1973)	PlotCalais09
taxonIdCalais106	phytosociological survey estimating species cardinality (a combiantion of species cover and abundance) in a 10x10m plot	r	Category Species cardinality	2008-10-21T09:26Z	Estimating species cardinality using Wilmanns cover-abundance scale (Wilmanns 1973)	PlotCalais09
taxonIdCalais003	phytosociological survey estimating species cardinality (a combiantion of species cover and abundance) in a 10x10m plot	r	Category Species cardinality	2008-10-21T09:26Z	Estimating species cardinality using Wilmanns cover-abundance scale (Wilmanns 1973)	PlotCalais10
taxonIdCalais006	phytosociological survey estimating species cardinality (a combiantion of species cover and abundance) in a 10x10m plot	1	Category Species cardinality	2008-10-21T09:26Z	Estimating species cardinality using Wilmanns cover-abundance scale (Wilmanns 1973)	PlotCalais10
taxonIdCalais012	phytosociological survey estimating species cardinality (a combiantion of species cover and abundance) in a 10x10m plot	+	Category Species cardinality	2008-10-21T09:26Z	Estimating species cardinality using Wilmanns cover-abundance scale (Wilmanns 1973)	PlotCalais10
taxonIdCalais017	phytosociological survey estimating species cardinality (a combiantion of species cover and abundance) in a 10x10m plot	1	Category Species cardinality	2008-10-21T09:26Z	Estimating species cardinality using Wilmanns cover-abundance scale (Wilmanns 1973)	PlotCalais10
taxonIdCalais018	phytosociological survey estimating species cardinality (a combiantion of species cover and abundance) in a 10x10m plot	+	Category Species cardinality	2008-10-21T09:26Z	Estimating species cardinality using Wilmanns cover-abundance scale (Wilmanns 1973)	PlotCalais10
taxonIdCalais026	phytosociological survey estimating species cardinality (a combiantion of species cover and abundance) in a 10x10m plot	+	Category Species cardinality	2008-10-21T09:26Z	Estimating species cardinality using Wilmanns cover-abundance scale (Wilmanns 1973)	PlotCalais10
taxonIdCalais029	phytosociological survey estimating species cardinality (a combiantion of species cover and abundance) in a 10x10m plot	1	Category Species cardinality	2008-10-21T09:26Z	Estimating species cardinality using Wilmanns cover-abundance scale (Wilmanns 1973)	PlotCalais10
taxonIdCalais032	phytosociological survey estimating species cardinality (a combiantion of species cover and abundance) in a 10x10m plot	1	Category Species cardinality	2008-10-21T09:26Z	Estimating species cardinality using Wilmanns cover-abundance scale (Wilmanns 1973)	PlotCalais10
taxonIdCalais037	phytosociological survey estimating species cardinality (a combiantion of species cover and abundance) in a 10x10m plot	2m	Category Species cardinality	2008-10-21T09:26Z	Estimating species cardinality using Wilmanns cover-abundance scale (Wilmanns 1973)	PlotCalais10
taxonIdCalais041	phytosociological survey estimating species cardinality (a combiantion of species cover and abundance) in a 10x10m plot	r	Category Species cardinality	2008-10-21T09:26Z	Estimating species cardinality using Wilmanns cover-abundance scale (Wilmanns 1973)	PlotCalais10
taxonIdCalais045	phytosociological survey estimating species cardinality (a combiantion of species cover and abundance) in a 10x10m plot	1	Category Species cardinality	2008-10-21T09:26Z	Estimating species cardinality using Wilmanns cover-abundance scale (Wilmanns 1973)	PlotCalais10
taxonIdCalais046	phytosociological survey estimating species cardinality (a combiantion of species cover and abundance) in a 10x10m plot	r	Category Species cardinality	2008-10-21T09:26Z	Estimating species cardinality using Wilmanns cover-abundance scale (Wilmanns 1973)	PlotCalais10
taxonIdCalais049	phytosociological survey estimating species cardinality (a combiantion of species cover and abundance) in a 10x10m plot	1	Category Species cardinality	2008-10-21T09:26Z	Estimating species cardinality using Wilmanns cover-abundance scale (Wilmanns 1973)	PlotCalais10
taxonIdCalais052	phytosociological survey estimating species cardinality (a combiantion of species cover and abundance) in a 10x10m plot	+	Category Species cardinality	2008-10-21T09:26Z	Estimating species cardinality using Wilmanns cover-abundance scale (Wilmanns 1973)	PlotCalais10
taxonIdCalais062	phytosociological survey estimating species cardinality (a combiantion of species cover and abundance) in a 10x10m plot	r	Category Species cardinality	2008-10-21T09:26Z	Estimating species cardinality using Wilmanns cover-abundance scale (Wilmanns 1973)	PlotCalais10
taxonIdCalais063	phytosociological survey estimating species cardinality (a combiantion of species cover and abundance) in a 10x10m plot	r	Category Species cardinality	2008-10-21T09:26Z	Estimating species cardinality using Wilmanns cover-abundance scale (Wilmanns 1973)	PlotCalais10
taxonIdCalais066	phytosociological survey estimating species cardinality (a combiantion of species cover and abundance) in a 10x10m plot	+	Category Species cardinality	2008-10-21T09:26Z	Estimating species cardinality using Wilmanns cover-abundance scale (Wilmanns 1973)	PlotCalais10
taxonIdCalais081	phytosociological survey estimating species cardinality (a combiantion of species cover and abundance) in a 10x10m plot	3	Category Species cardinality	2008-10-21T09:26Z	Estimating species cardinality using Wilmanns cover-abundance scale (Wilmanns 1973)	PlotCalais10
taxonIdCalais083	phytosociological survey estimating species cardinality (a combiantion of species cover and abundance) in a 10x10m plot	2m	Category Species cardinality	2008-10-21T09:26Z	Estimating species cardinality using Wilmanns cover-abundance scale (Wilmanns 1973)	PlotCalais10
taxonIdCalais085	phytosociological survey estimating species cardinality (a combiantion of species cover and abundance) in a 10x10m plot	2a	Category Species cardinality	2008-10-21T09:26Z	Estimating species cardinality using Wilmanns cover-abundance scale (Wilmanns 1973)	PlotCalais10
taxonIdCalais086	phytosociological survey estimating species cardinality (a combiantion of species cover and abundance) in a 10x10m plot	+	Category Species cardinality	2008-10-21T09:26Z	Estimating species cardinality using Wilmanns cover-abundance scale (Wilmanns 1973)	PlotCalais10
taxonIdCalais088	phytosociological survey estimating species cardinality (a combiantion of species cover and abundance) in a 10x10m plot	2m	Category Species cardinality	2008-10-21T09:26Z	Estimating species cardinality using Wilmanns cover-abundance scale (Wilmanns 1973)	PlotCalais10
taxonIdCalais093	phytosociological survey estimating species cardinality (a combiantion of species cover and abundance) in a 10x10m plot	1	Category Species cardinality	2008-10-21T09:26Z	Estimating species cardinality using Wilmanns cover-abundance scale (Wilmanns 1973)	PlotCalais10
taxonIdCalais094	phytosociological survey estimating species cardinality (a combiantion of species cover and abundance) in a 10x10m plot	+	Category Species cardinality	2008-10-21T09:26Z	Estimating species cardinality using Wilmanns cover-abundance scale (Wilmanns 1973)	PlotCalais10
taxonIdCalais097	phytosociological survey estimating species cardinality (a combiantion of species cover and abundance) in a 10x10m plot	1	Category Species cardinality	2008-10-21T09:26Z	Estimating species cardinality using Wilmanns cover-abundance scale (Wilmanns 1973)	PlotCalais10
taxonIdCalais104	phytosociological survey estimating species cardinality (a combiantion of species cover and abundance) in a 10x10m plot	2b	Category Species cardinality	2008-10-21T09:26Z	Estimating species cardinality using Wilmanns cover-abundance scale (Wilmanns 1973)	PlotCalais10
taxonIdCalais105	phytosociological survey estimating species cardinality (a combiantion of species cover and abundance) in a 10x10m plot	1	Category Species cardinality	2008-10-21T09:26Z	Estimating species cardinality using Wilmanns cover-abundance scale (Wilmanns 1973)	PlotCalais10
taxonIdCalais106	phytosociological survey estimating species cardinality (a combiantion of species cover and abundance) in a 10x10m plot	+	Category Species cardinality	2008-10-21T09:26Z	Estimating species cardinality using Wilmanns cover-abundance scale (Wilmanns 1973)	PlotCalais10
taxonIdCalais107	phytosociological survey estimating species cardinality (a combiantion of species cover and abundance) in a 10x10m plot	+	Category Species cardinality	2008-10-21T09:26Z	Estimating species cardinality using Wilmanns cover-abundance scale (Wilmanns 1973)	PlotCalais10
taxonIdCalais007	phytosociological survey estimating species cardinality (a combiantion of species cover and abundance) in a 10x10m plot	+	Category Species cardinality	2008-10-21T09:26Z	Estimating species cardinality using Wilmanns cover-abundance scale (Wilmanns 1973)	PlotCalais11
taxonIdCalais010	phytosociological survey estimating species cardinality (a combiantion of species cover and abundance) in a 10x10m plot	+	Category Species cardinality	2008-10-21T09:26Z	Estimating species cardinality using Wilmanns cover-abundance scale (Wilmanns 1973)	PlotCalais11
taxonIdCalais011	phytosociological survey estimating species cardinality (a combiantion of species cover and abundance) in a 10x10m plot	1	Category Species cardinality	2008-10-21T09:26Z	Estimating species cardinality using Wilmanns cover-abundance scale (Wilmanns 1973)	PlotCalais11
taxonIdCalais013	phytosociological survey estimating species cardinality (a combiantion of species cover and abundance) in a 10x10m plot	r	Category Species cardinality	2008-10-21T09:26Z	Estimating species cardinality using Wilmanns cover-abundance scale (Wilmanns 1973)	PlotCalais11
taxonIdCalais014	phytosociological survey estimating species cardinality (a combiantion of species cover and abundance) in a 10x10m plot	+	Category Species cardinality	2008-10-21T09:26Z	Estimating species cardinality using Wilmanns cover-abundance scale (Wilmanns 1973)	PlotCalais11
taxonIdCalais015	phytosociological survey estimating species cardinality (a combiantion of species cover and abundance) in a 10x10m plot	r	Category Species cardinality	2008-10-21T09:26Z	Estimating species cardinality using Wilmanns cover-abundance scale (Wilmanns 1973)	PlotCalais11
taxonIdCalais016	phytosociological survey estimating species cardinality (a combiantion of species cover and abundance) in a 10x10m plot	r	Category Species cardinality	2008-10-21T09:26Z	Estimating species cardinality using Wilmanns cover-abundance scale (Wilmanns 1973)	PlotCalais11
taxonIdCalais020	phytosociological survey estimating species cardinality (a combiantion of species cover and abundance) in a 10x10m plot	+	Category Species cardinality	2008-10-21T09:26Z	Estimating species cardinality using Wilmanns cover-abundance scale (Wilmanns 1973)	PlotCalais11
taxonIdCalais022	phytosociological survey estimating species cardinality (a combiantion of species cover and abundance) in a 10x10m plot	1	Category Species cardinality	2008-10-21T09:26Z	Estimating species cardinality using Wilmanns cover-abundance scale (Wilmanns 1973)	PlotCalais11
taxonIdCalais024	phytosociological survey estimating species cardinality (a combiantion of species cover and abundance) in a 10x10m plot	+	Category Species cardinality	2008-10-21T09:26Z	Estimating species cardinality using Wilmanns cover-abundance scale (Wilmanns 1973)	PlotCalais11
taxonIdCalais026	phytosociological survey estimating species cardinality (a combiantion of species cover and abundance) in a 10x10m plot	r	Category Species cardinality	2008-10-21T09:26Z	Estimating species cardinality using Wilmanns cover-abundance scale (Wilmanns 1973)	PlotCalais11
taxonIdCalais036	phytosociological survey estimating species cardinality (a combiantion of species cover and abundance) in a 10x10m plot	+	Category Species cardinality	2008-10-21T09:26Z	Estimating species cardinality using Wilmanns cover-abundance scale (Wilmanns 1973)	PlotCalais11
taxonIdCalais044	phytosociological survey estimating species cardinality (a combiantion of species cover and abundance) in a 10x10m plot	r	Category Species cardinality	2008-10-21T09:26Z	Estimating species cardinality using Wilmanns cover-abundance scale (Wilmanns 1973)	PlotCalais11
taxonIdCalais056	phytosociological survey estimating species cardinality (a combiantion of species cover and abundance) in a 10x10m plot	r	Category Species cardinality	2008-10-21T09:26Z	Estimating species cardinality using Wilmanns cover-abundance scale (Wilmanns 1973)	PlotCalais11
taxonIdCalais062	phytosociological survey estimating species cardinality (a combiantion of species cover and abundance) in a 10x10m plot	+	Category Species cardinality	2008-10-21T09:26Z	Estimating species cardinality using Wilmanns cover-abundance scale (Wilmanns 1973)	PlotCalais11
taxonIdCalais064	phytosociological survey estimating species cardinality (a combiantion of species cover and abundance) in a 10x10m plot	r	Category Species cardinality	2008-10-21T09:26Z	Estimating species cardinality using Wilmanns cover-abundance scale (Wilmanns 1973)	PlotCalais11
taxonIdCalais066	phytosociological survey estimating species cardinality (a combiantion of species cover and abundance) in a 10x10m plot	+	Category Species cardinality	2008-10-21T09:26Z	Estimating species cardinality using Wilmanns cover-abundance scale (Wilmanns 1973)	PlotCalais11
taxonIdCalais068	phytosociological survey estimating species cardinality (a combiantion of species cover and abundance) in a 10x10m plot	+	Category Species cardinality	2008-10-21T09:26Z	Estimating species cardinality using Wilmanns cover-abundance scale (Wilmanns 1973)	PlotCalais11
taxonIdCalais069	phytosociological survey estimating species cardinality (a combiantion of species cover and abundance) in a 10x10m plot	2b	Category Species cardinality	2008-10-21T09:26Z	Estimating species cardinality using Wilmanns cover-abundance scale (Wilmanns 1973)	PlotCalais11
taxonIdCalais070	phytosociological survey estimating species cardinality (a combiantion of species cover and abundance) in a 10x10m plot	r	Category Species cardinality	2008-10-21T09:26Z	Estimating species cardinality using Wilmanns cover-abundance scale (Wilmanns 1973)	PlotCalais11
taxonIdCalais074	phytosociological survey estimating species cardinality (a combiantion of species cover and abundance) in a 10x10m plot	2b	Category Species cardinality	2008-10-21T09:26Z	Estimating species cardinality using Wilmanns cover-abundance scale (Wilmanns 1973)	PlotCalais11
taxonIdCalais076	phytosociological survey estimating species cardinality (a combiantion of species cover and abundance) in a 10x10m plot	2m	Category Species cardinality	2008-10-21T09:26Z	Estimating species cardinality using Wilmanns cover-abundance scale (Wilmanns 1973)	PlotCalais11
taxonIdCalais078	phytosociological survey estimating species cardinality (a combiantion of species cover and abundance) in a 10x10m plot	1	Category Species cardinality	2008-10-21T09:26Z	Estimating species cardinality using Wilmanns cover-abundance scale (Wilmanns 1973)	PlotCalais11
taxonIdCalais086	phytosociological survey estimating species cardinality (a combiantion of species cover and abundance) in a 10x10m plot	2m	Category Species cardinality	2008-10-21T09:26Z	Estimating species cardinality using Wilmanns cover-abundance scale (Wilmanns 1973)	PlotCalais11
taxonIdCalais091	phytosociological survey estimating species cardinality (a combiantion of species cover and abundance) in a 10x10m plot	1	Category Species cardinality	2008-10-21T09:26Z	Estimating species cardinality using Wilmanns cover-abundance scale (Wilmanns 1973)	PlotCalais11
taxonIdCalais097	phytosociological survey estimating species cardinality (a combiantion of species cover and abundance) in a 10x10m plot	+	Category Species cardinality	2008-10-21T09:26Z	Estimating species cardinality using Wilmanns cover-abundance scale (Wilmanns 1973)	PlotCalais11
taxonIdCalais100	phytosociological survey estimating species cardinality (a combiantion of species cover and abundance) in a 10x10m plot	r	Category Species cardinality	2008-10-21T09:26Z	Estimating species cardinality using Wilmanns cover-abundance scale (Wilmanns 1973)	PlotCalais11
taxonIdCalais101	phytosociological survey estimating species cardinality (a combiantion of species cover and abundance) in a 10x10m plot	1	Category Species cardinality	2008-10-21T09:26Z	Estimating species cardinality using Wilmanns cover-abundance scale (Wilmanns 1973)	PlotCalais11
taxonIdCalais106	phytosociological survey estimating species cardinality (a combiantion of species cover and abundance) in a 10x10m plot	r	Category Species cardinality	2008-10-21T09:26Z	Estimating species cardinality using Wilmanns cover-abundance scale (Wilmanns 1973)	PlotCalais11
taxonIdCalais107	phytosociological survey estimating species cardinality (a combiantion of species cover and abundance) in a 10x10m plot	1	Category Species cardinality	2008-10-21T09:26Z	Estimating species cardinality using Wilmanns cover-abundance scale (Wilmanns 1973)	PlotCalais11
taxonIdCalais004	phytosociological survey estimating species cardinality (a combiantion of species cover and abundance) in a 10x10m plot	r	Category Species cardinality	2008-10-21T09:26Z	Estimating species cardinality using Wilmanns cover-abundance scale (Wilmanns 1973)	PlotCalais12
taxonIdCalais007	phytosociological survey estimating species cardinality (a combiantion of species cover and abundance) in a 10x10m plot	1	Category Species cardinality	2008-10-21T09:26Z	Estimating species cardinality using Wilmanns cover-abundance scale (Wilmanns 1973)	PlotCalais12
taxonIdCalais010	phytosociological survey estimating species cardinality (a combiantion of species cover and abundance) in a 10x10m plot	1	Category Species cardinality	2008-10-21T09:26Z	Estimating species cardinality using Wilmanns cover-abundance scale (Wilmanns 1973)	PlotCalais12
taxonIdCalais011	phytosociological survey estimating species cardinality (a combiantion of species cover and abundance) in a 10x10m plot	1	Category Species cardinality	2008-10-21T09:26Z	Estimating species cardinality using Wilmanns cover-abundance scale (Wilmanns 1973)	PlotCalais12
taxonIdCalais016	phytosociological survey estimating species cardinality (a combiantion of species cover and abundance) in a 10x10m plot	1	Category Species cardinality	2008-10-21T09:26Z	Estimating species cardinality using Wilmanns cover-abundance scale (Wilmanns 1973)	PlotCalais12
taxonIdCalais018	phytosociological survey estimating species cardinality (a combiantion of species cover and abundance) in a 10x10m plot	r	Category Species cardinality	2008-10-21T09:26Z	Estimating species cardinality using Wilmanns cover-abundance scale (Wilmanns 1973)	PlotCalais12
taxonIdCalais020	phytosociological survey estimating species cardinality (a combiantion of species cover and abundance) in a 10x10m plot	1	Category Species cardinality	2008-10-21T09:26Z	Estimating species cardinality using Wilmanns cover-abundance scale (Wilmanns 1973)	PlotCalais12
taxonIdCalais022	phytosociological survey estimating species cardinality (a combiantion of species cover and abundance) in a 10x10m plot	+	Category Species cardinality	2008-10-21T09:26Z	Estimating species cardinality using Wilmanns cover-abundance scale (Wilmanns 1973)	PlotCalais12
taxonIdCalais031	phytosociological survey estimating species cardinality (a combiantion of species cover and abundance) in a 10x10m plot	+	Category Species cardinality	2008-10-21T09:26Z	Estimating species cardinality using Wilmanns cover-abundance scale (Wilmanns 1973)	PlotCalais12
taxonIdCalais038	phytosociological survey estimating species cardinality (a combiantion of species cover and abundance) in a 10x10m plot	+	Category Species cardinality	2008-10-21T09:26Z	Estimating species cardinality using Wilmanns cover-abundance scale (Wilmanns 1973)	PlotCalais12
taxonIdCalais044	phytosociological survey estimating species cardinality (a combiantion of species cover and abundance) in a 10x10m plot	r	Category Species cardinality	2008-10-21T09:26Z	Estimating species cardinality using Wilmanns cover-abundance scale (Wilmanns 1973)	PlotCalais12
taxonIdCalais050	phytosociological survey estimating species cardinality (a combiantion of species cover and abundance) in a 10x10m plot	r	Category Species cardinality	2008-10-21T09:26Z	Estimating species cardinality using Wilmanns cover-abundance scale (Wilmanns 1973)	PlotCalais12
taxonIdCalais051	phytosociological survey estimating species cardinality (a combiantion of species cover and abundance) in a 10x10m plot	r	Category Species cardinality	2008-10-21T09:26Z	Estimating species cardinality using Wilmanns cover-abundance scale (Wilmanns 1973)	PlotCalais12
taxonIdCalais056	phytosociological survey estimating species cardinality (a combiantion of species cover and abundance) in a 10x10m plot	+	Category Species cardinality	2008-10-21T09:26Z	Estimating species cardinality using Wilmanns cover-abundance scale (Wilmanns 1973)	PlotCalais12
taxonIdCalais062	phytosociological survey estimating species cardinality (a combiantion of species cover and abundance) in a 10x10m plot	+	Category Species cardinality	2008-10-21T09:26Z	Estimating species cardinality using Wilmanns cover-abundance scale (Wilmanns 1973)	PlotCalais12
taxonIdCalais068	phytosociological survey estimating species cardinality (a combiantion of species cover and abundance) in a 10x10m plot	r	Category Species cardinality	2008-10-21T09:26Z	Estimating species cardinality using Wilmanns cover-abundance scale (Wilmanns 1973)	PlotCalais12
taxonIdCalais074	phytosociological survey estimating species cardinality (a combiantion of species cover and abundance) in a 10x10m plot	2m	Category Species cardinality	2008-10-21T09:26Z	Estimating species cardinality using Wilmanns cover-abundance scale (Wilmanns 1973)	PlotCalais12
taxonIdCalais076	phytosociological survey estimating species cardinality (a combiantion of species cover and abundance) in a 10x10m plot	2m	Category Species cardinality	2008-10-21T09:26Z	Estimating species cardinality using Wilmanns cover-abundance scale (Wilmanns 1973)	PlotCalais12
taxonIdCalais078	phytosociological survey estimating species cardinality (a combiantion of species cover and abundance) in a 10x10m plot	+	Category Species cardinality	2008-10-21T09:26Z	Estimating species cardinality using Wilmanns cover-abundance scale (Wilmanns 1973)	PlotCalais12
taxonIdCalais081	phytosociological survey estimating species cardinality (a combiantion of species cover and abundance) in a 10x10m plot	4	Category Species cardinality	2008-10-21T09:26Z	Estimating species cardinality using Wilmanns cover-abundance scale (Wilmanns 1973)	PlotCalais12
taxonIdCalais100	phytosociological survey estimating species cardinality (a combiantion of species cover and abundance) in a 10x10m plot	r	Category Species cardinality	2008-10-21T09:26Z	Estimating species cardinality using Wilmanns cover-abundance scale (Wilmanns 1973)	PlotCalais12
taxonIdCalais104	phytosociological survey estimating species cardinality (a combiantion of species cover and abundance) in a 10x10m plot	r	Category Species cardinality	2008-10-21T09:26Z	Estimating species cardinality using Wilmanns cover-abundance scale (Wilmanns 1973)	PlotCalais12
taxonIdCalais004	phytosociological survey estimating species cardinality (a combiantion of species cover and abundance) in a 10x10m plot	1	Category Species cardinality	2008-10-21T09:26Z	Estimating species cardinality using Wilmanns cover-abundance scale (Wilmanns 1973)	PlotCalais13
taxonIdCalais007	phytosociological survey estimating species cardinality (a combiantion of species cover and abundance) in a 10x10m plot	1	Category Species cardinality	2008-10-21T09:26Z	Estimating species cardinality using Wilmanns cover-abundance scale (Wilmanns 1973)	PlotCalais13
taxonIdCalais008	phytosociological survey estimating species cardinality (a combiantion of species cover and abundance) in a 10x10m plot	+	Category Species cardinality	2008-10-21T09:26Z	Estimating species cardinality using Wilmanns cover-abundance scale (Wilmanns 1973)	PlotCalais13
taxonIdCalais010	phytosociological survey estimating species cardinality (a combiantion of species cover and abundance) in a 10x10m plot	+	Category Species cardinality	2008-10-21T09:26Z	Estimating species cardinality using Wilmanns cover-abundance scale (Wilmanns 1973)	PlotCalais13
taxonIdCalais014	phytosociological survey estimating species cardinality (a combiantion of species cover and abundance) in a 10x10m plot	2a	Category Species cardinality	2008-10-21T09:26Z	Estimating species cardinality using Wilmanns cover-abundance scale (Wilmanns 1973)	PlotCalais13
taxonIdCalais026	phytosociological survey estimating species cardinality (a combiantion of species cover and abundance) in a 10x10m plot	+	Category Species cardinality	2008-10-21T09:26Z	Estimating species cardinality using Wilmanns cover-abundance scale (Wilmanns 1973)	PlotCalais13
taxonIdCalais034	phytosociological survey estimating species cardinality (a combiantion of species cover and abundance) in a 10x10m plot	2a	Category Species cardinality	2008-10-21T09:26Z	Estimating species cardinality using Wilmanns cover-abundance scale (Wilmanns 1973)	PlotCalais13
taxonIdCalais036	phytosociological survey estimating species cardinality (a combiantion of species cover and abundance) in a 10x10m plot	1	Category Species cardinality	2008-10-21T09:26Z	Estimating species cardinality using Wilmanns cover-abundance scale (Wilmanns 1973)	PlotCalais13
taxonIdCalais049	phytosociological survey estimating species cardinality (a combiantion of species cover and abundance) in a 10x10m plot	r	Category Species cardinality	2008-10-21T09:26Z	Estimating species cardinality using Wilmanns cover-abundance scale (Wilmanns 1973)	PlotCalais13
taxonIdCalais054	phytosociological survey estimating species cardinality (a combiantion of species cover and abundance) in a 10x10m plot	+	Category Species cardinality	2008-10-21T09:26Z	Estimating species cardinality using Wilmanns cover-abundance scale (Wilmanns 1973)	PlotCalais13
taxonIdCalais059	phytosociological survey estimating species cardinality (a combiantion of species cover and abundance) in a 10x10m plot	r	Category Species cardinality	2008-10-21T09:26Z	Estimating species cardinality using Wilmanns cover-abundance scale (Wilmanns 1973)	PlotCalais13
taxonIdCalais062	phytosociological survey estimating species cardinality (a combiantion of species cover and abundance) in a 10x10m plot	r	Category Species cardinality	2008-10-21T09:26Z	Estimating species cardinality using Wilmanns cover-abundance scale (Wilmanns 1973)	PlotCalais13
taxonIdCalais064	phytosociological survey estimating species cardinality (a combiantion of species cover and abundance) in a 10x10m plot	+	Category Species cardinality	2008-10-21T09:26Z	Estimating species cardinality using Wilmanns cover-abundance scale (Wilmanns 1973)	PlotCalais13
taxonIdCalais068	phytosociological survey estimating species cardinality (a combiantion of species cover and abundance) in a 10x10m plot	2a	Category Species cardinality	2008-10-21T09:26Z	Estimating species cardinality using Wilmanns cover-abundance scale (Wilmanns 1973)	PlotCalais13
taxonIdCalais074	phytosociological survey estimating species cardinality (a combiantion of species cover and abundance) in a 10x10m plot	2a	Category Species cardinality	2008-10-21T09:26Z	Estimating species cardinality using Wilmanns cover-abundance scale (Wilmanns 1973)	PlotCalais13
taxonIdCalais076	phytosociological survey estimating species cardinality (a combiantion of species cover and abundance) in a 10x10m plot	2m	Category Species cardinality	2008-10-21T09:26Z	Estimating species cardinality using Wilmanns cover-abundance scale (Wilmanns 1973)	PlotCalais13
taxonIdCalais077	phytosociological survey estimating species cardinality (a combiantion of species cover and abundance) in a 10x10m plot	1	Category Species cardinality	2008-10-21T09:26Z	Estimating species cardinality using Wilmanns cover-abundance scale (Wilmanns 1973)	PlotCalais13
taxonIdCalais078	phytosociological survey estimating species cardinality (a combiantion of species cover and abundance) in a 10x10m plot	2m	Category Species cardinality	2008-10-21T09:26Z	Estimating species cardinality using Wilmanns cover-abundance scale (Wilmanns 1973)	PlotCalais13
taxonIdCalais080	phytosociological survey estimating species cardinality (a combiantion of species cover and abundance) in a 10x10m plot	1	Category Species cardinality	2008-10-21T09:26Z	Estimating species cardinality using Wilmanns cover-abundance scale (Wilmanns 1973)	PlotCalais13
taxonIdCalais081	phytosociological survey estimating species cardinality (a combiantion of species cover and abundance) in a 10x10m plot	3	Category Species cardinality	2008-10-21T09:26Z	Estimating species cardinality using Wilmanns cover-abundance scale (Wilmanns 1973)	PlotCalais13
taxonIdCalais082	phytosociological survey estimating species cardinality (a combiantion of species cover and abundance) in a 10x10m plot	2a	Category Species cardinality	2008-10-21T09:26Z	Estimating species cardinality using Wilmanns cover-abundance scale (Wilmanns 1973)	PlotCalais13
taxonIdCalais083	phytosociological survey estimating species cardinality (a combiantion of species cover and abundance) in a 10x10m plot	2m	Category Species cardinality	2008-10-21T09:26Z	Estimating species cardinality using Wilmanns cover-abundance scale (Wilmanns 1973)	PlotCalais13
taxonIdCalais096	phytosociological survey estimating species cardinality (a combiantion of species cover and abundance) in a 10x10m plot	r	Category Species cardinality	2008-10-21T09:26Z	Estimating species cardinality using Wilmanns cover-abundance scale (Wilmanns 1973)	PlotCalais13
taxonIdCalais100	phytosociological survey estimating species cardinality (a combiantion of species cover and abundance) in a 10x10m plot	r	Category Species cardinality	2008-10-21T09:26Z	Estimating species cardinality using Wilmanns cover-abundance scale (Wilmanns 1973)	PlotCalais13
taxonIdCalais101	phytosociological survey estimating species cardinality (a combiantion of species cover and abundance) in a 10x10m plot	1	Category Species cardinality	2008-10-21T09:26Z	Estimating species cardinality using Wilmanns cover-abundance scale (Wilmanns 1973)	PlotCalais13
taxonIdCalais107	phytosociological survey estimating species cardinality (a combiantion of species cover and abundance) in a 10x10m plot	1	Category Species cardinality	2008-10-21T09:26Z	Estimating species cardinality using Wilmanns cover-abundance scale (Wilmanns 1973)	PlotCalais13
taxonIdCalais007	phytosociological survey estimating species cardinality (a combiantion of species cover and abundance) in a 10x10m plot	+	Category Species cardinality	2008-10-21T09:26Z	Estimating species cardinality using Wilmanns cover-abundance scale (Wilmanns 1973)	PlotCalais14
taxonIdCalais010	phytosociological survey estimating species cardinality (a combiantion of species cover and abundance) in a 10x10m plot	1	Category Species cardinality	2008-10-21T09:26Z	Estimating species cardinality using Wilmanns cover-abundance scale (Wilmanns 1973)	PlotCalais14
taxonIdCalais011	phytosociological survey estimating species cardinality (a combiantion of species cover and abundance) in a 10x10m plot	1	Category Species cardinality	2008-10-21T09:26Z	Estimating species cardinality using Wilmanns cover-abundance scale (Wilmanns 1973)	PlotCalais14
taxonIdCalais015	phytosociological survey estimating species cardinality (a combiantion of species cover and abundance) in a 10x10m plot	+	Category Species cardinality	2008-10-21T09:26Z	Estimating species cardinality using Wilmanns cover-abundance scale (Wilmanns 1973)	PlotCalais14
taxonIdCalais016	phytosociological survey estimating species cardinality (a combiantion of species cover and abundance) in a 10x10m plot	+	Category Species cardinality	2008-10-21T09:26Z	Estimating species cardinality using Wilmanns cover-abundance scale (Wilmanns 1973)	PlotCalais14
taxonIdCalais020	phytosociological survey estimating species cardinality (a combiantion of species cover and abundance) in a 10x10m plot	+	Category Species cardinality	2008-10-21T09:26Z	Estimating species cardinality using Wilmanns cover-abundance scale (Wilmanns 1973)	PlotCalais14
taxonIdCalais022	phytosociological survey estimating species cardinality (a combiantion of species cover and abundance) in a 10x10m plot	+	Category Species cardinality	2008-10-21T09:26Z	Estimating species cardinality using Wilmanns cover-abundance scale (Wilmanns 1973)	PlotCalais14
taxonIdCalais026	phytosociological survey estimating species cardinality (a combiantion of species cover and abundance) in a 10x10m plot	+	Category Species cardinality	2008-10-21T09:26Z	Estimating species cardinality using Wilmanns cover-abundance scale (Wilmanns 1973)	PlotCalais14
taxonIdCalais036	phytosociological survey estimating species cardinality (a combiantion of species cover and abundance) in a 10x10m plot	1	Category Species cardinality	2008-10-21T09:26Z	Estimating species cardinality using Wilmanns cover-abundance scale (Wilmanns 1973)	PlotCalais14
taxonIdCalais049	phytosociological survey estimating species cardinality (a combiantion of species cover and abundance) in a 10x10m plot	r	Category Species cardinality	2008-10-21T09:26Z	Estimating species cardinality using Wilmanns cover-abundance scale (Wilmanns 1973)	PlotCalais14
taxonIdCalais051	phytosociological survey estimating species cardinality (a combiantion of species cover and abundance) in a 10x10m plot	2a	Category Species cardinality	2008-10-21T09:26Z	Estimating species cardinality using Wilmanns cover-abundance scale (Wilmanns 1973)	PlotCalais14
taxonIdCalais060	phytosociological survey estimating species cardinality (a combiantion of species cover and abundance) in a 10x10m plot	+	Category Species cardinality	2008-10-21T09:26Z	Estimating species cardinality using Wilmanns cover-abundance scale (Wilmanns 1973)	PlotCalais14
taxonIdCalais064	phytosociological survey estimating species cardinality (a combiantion of species cover and abundance) in a 10x10m plot	r	Category Species cardinality	2008-10-21T09:26Z	Estimating species cardinality using Wilmanns cover-abundance scale (Wilmanns 1973)	PlotCalais14
taxonIdCalais066	phytosociological survey estimating species cardinality (a combiantion of species cover and abundance) in a 10x10m plot	r	Category Species cardinality	2008-10-21T09:26Z	Estimating species cardinality using Wilmanns cover-abundance scale (Wilmanns 1973)	PlotCalais14
taxonIdCalais068	phytosociological survey estimating species cardinality (a combiantion of species cover and abundance) in a 10x10m plot	+	Category Species cardinality	2008-10-21T09:26Z	Estimating species cardinality using Wilmanns cover-abundance scale (Wilmanns 1973)	PlotCalais14
taxonIdCalais074	phytosociological survey estimating species cardinality (a combiantion of species cover and abundance) in a 10x10m plot	2a	Category Species cardinality	2008-10-21T09:26Z	Estimating species cardinality using Wilmanns cover-abundance scale (Wilmanns 1973)	PlotCalais14
taxonIdCalais076	phytosociological survey estimating species cardinality (a combiantion of species cover and abundance) in a 10x10m plot	2m	Category Species cardinality	2008-10-21T09:26Z	Estimating species cardinality using Wilmanns cover-abundance scale (Wilmanns 1973)	PlotCalais14
taxonIdCalais078	phytosociological survey estimating species cardinality (a combiantion of species cover and abundance) in a 10x10m plot	2m	Category Species cardinality	2008-10-21T09:26Z	Estimating species cardinality using Wilmanns cover-abundance scale (Wilmanns 1973)	PlotCalais14
taxonIdCalais080	phytosociological survey estimating species cardinality (a combiantion of species cover and abundance) in a 10x10m plot	2m	Category Species cardinality	2008-10-21T09:26Z	Estimating species cardinality using Wilmanns cover-abundance scale (Wilmanns 1973)	PlotCalais14
taxonIdCalais081	phytosociological survey estimating species cardinality (a combiantion of species cover and abundance) in a 10x10m plot	3	Category Species cardinality	2008-10-21T09:26Z	Estimating species cardinality using Wilmanns cover-abundance scale (Wilmanns 1973)	PlotCalais14
taxonIdCalais082	phytosociological survey estimating species cardinality (a combiantion of species cover and abundance) in a 10x10m plot	2m	Category Species cardinality	2008-10-21T09:26Z	Estimating species cardinality using Wilmanns cover-abundance scale (Wilmanns 1973)	PlotCalais14
taxonIdCalais083	phytosociological survey estimating species cardinality (a combiantion of species cover and abundance) in a 10x10m plot	2m	Category Species cardinality	2008-10-21T09:26Z	Estimating species cardinality using Wilmanns cover-abundance scale (Wilmanns 1973)	PlotCalais14
taxonIdCalais086	phytosociological survey estimating species cardinality (a combiantion of species cover and abundance) in a 10x10m plot	1	Category Species cardinality	2008-10-21T09:26Z	Estimating species cardinality using Wilmanns cover-abundance scale (Wilmanns 1973)	PlotCalais14
taxonIdCalais090	phytosociological survey estimating species cardinality (a combiantion of species cover and abundance) in a 10x10m plot	+	Category Species cardinality	2008-10-21T09:26Z	Estimating species cardinality using Wilmanns cover-abundance scale (Wilmanns 1973)	PlotCalais14
taxonIdCalais091	phytosociological survey estimating species cardinality (a combiantion of species cover and abundance) in a 10x10m plot	1	Category Species cardinality	2008-10-21T09:26Z	Estimating species cardinality using Wilmanns cover-abundance scale (Wilmanns 1973)	PlotCalais14
taxonIdCalais097	phytosociological survey estimating species cardinality (a combiantion of species cover and abundance) in a 10x10m plot	+	Category Species cardinality	2008-10-21T09:26Z	Estimating species cardinality using Wilmanns cover-abundance scale (Wilmanns 1973)	PlotCalais14
taxonIdCalais100	phytosociological survey estimating species cardinality (a combiantion of species cover and abundance) in a 10x10m plot	+	Category Species cardinality	2008-10-21T09:26Z	Estimating species cardinality using Wilmanns cover-abundance scale (Wilmanns 1973)	PlotCalais14
taxonIdCalais101	phytosociological survey estimating species cardinality (a combiantion of species cover and abundance) in a 10x10m plot	1	Category Species cardinality	2008-10-21T09:26Z	Estimating species cardinality using Wilmanns cover-abundance scale (Wilmanns 1973)	PlotCalais14
taxonIdCalais104	phytosociological survey estimating species cardinality (a combiantion of species cover and abundance) in a 10x10m plot	r	Category Species cardinality	2008-10-21T09:26Z	Estimating species cardinality using Wilmanns cover-abundance scale (Wilmanns 1973)	PlotCalais14
taxonIdCalais107	phytosociological survey estimating species cardinality (a combiantion of species cover and abundance) in a 10x10m plot	1	Category Species cardinality	2008-10-21T09:26Z	Estimating species cardinality using Wilmanns cover-abundance scale (Wilmanns 1973)	PlotCalais14
taxonIdCalais006	phytosociological survey estimating species cardinality (a combiantion of species cover and abundance) in a 10x10m plot	+	Category Species cardinality	2008-10-21T09:26Z	Estimating species cardinality using Wilmanns cover-abundance scale (Wilmanns 1973)	PlotCalais15
taxonIdCalais010	phytosociological survey estimating species cardinality (a combiantion of species cover and abundance) in a 10x10m plot	1	Category Species cardinality	2008-10-21T09:26Z	Estimating species cardinality using Wilmanns cover-abundance scale (Wilmanns 1973)	PlotCalais15
taxonIdCalais011	phytosociological survey estimating species cardinality (a combiantion of species cover and abundance) in a 10x10m plot	1	Category Species cardinality	2008-10-21T09:26Z	Estimating species cardinality using Wilmanns cover-abundance scale (Wilmanns 1973)	PlotCalais15
taxonIdCalais014	phytosociological survey estimating species cardinality (a combiantion of species cover and abundance) in a 10x10m plot	r	Category Species cardinality	2008-10-21T09:26Z	Estimating species cardinality using Wilmanns cover-abundance scale (Wilmanns 1973)	PlotCalais15
taxonIdCalais015	phytosociological survey estimating species cardinality (a combiantion of species cover and abundance) in a 10x10m plot	1	Category Species cardinality	2008-10-21T09:26Z	Estimating species cardinality using Wilmanns cover-abundance scale (Wilmanns 1973)	PlotCalais15
taxonIdCalais020	phytosociological survey estimating species cardinality (a combiantion of species cover and abundance) in a 10x10m plot	r	Category Species cardinality	2008-10-21T09:26Z	Estimating species cardinality using Wilmanns cover-abundance scale (Wilmanns 1973)	PlotCalais15
taxonIdCalais026	phytosociological survey estimating species cardinality (a combiantion of species cover and abundance) in a 10x10m plot	+	Category Species cardinality	2008-10-21T09:26Z	Estimating species cardinality using Wilmanns cover-abundance scale (Wilmanns 1973)	PlotCalais15
taxonIdCalais029	phytosociological survey estimating species cardinality (a combiantion of species cover and abundance) in a 10x10m plot	2a	Category Species cardinality	2008-10-21T09:26Z	Estimating species cardinality using Wilmanns cover-abundance scale (Wilmanns 1973)	PlotCalais15
taxonIdCalais041	phytosociological survey estimating species cardinality (a combiantion of species cover and abundance) in a 10x10m plot	+	Category Species cardinality	2008-10-21T09:26Z	Estimating species cardinality using Wilmanns cover-abundance scale (Wilmanns 1973)	PlotCalais15
taxonIdCalais042	phytosociological survey estimating species cardinality (a combiantion of species cover and abundance) in a 10x10m plot	r	Category Species cardinality	2008-10-21T09:26Z	Estimating species cardinality using Wilmanns cover-abundance scale (Wilmanns 1973)	PlotCalais15
taxonIdCalais044	phytosociological survey estimating species cardinality (a combiantion of species cover and abundance) in a 10x10m plot	r	Category Species cardinality	2008-10-21T09:26Z	Estimating species cardinality using Wilmanns cover-abundance scale (Wilmanns 1973)	PlotCalais15
taxonIdCalais051	phytosociological survey estimating species cardinality (a combiantion of species cover and abundance) in a 10x10m plot	1	Category Species cardinality	2008-10-21T09:26Z	Estimating species cardinality using Wilmanns cover-abundance scale (Wilmanns 1973)	PlotCalais15
taxonIdCalais056	phytosociological survey estimating species cardinality (a combiantion of species cover and abundance) in a 10x10m plot	1	Category Species cardinality	2008-10-21T09:26Z	Estimating species cardinality using Wilmanns cover-abundance scale (Wilmanns 1973)	PlotCalais15
taxonIdCalais060	phytosociological survey estimating species cardinality (a combiantion of species cover and abundance) in a 10x10m plot	r	Category Species cardinality	2008-10-21T09:26Z	Estimating species cardinality using Wilmanns cover-abundance scale (Wilmanns 1973)	PlotCalais15
taxonIdCalais064	phytosociological survey estimating species cardinality (a combiantion of species cover and abundance) in a 10x10m plot	+	Category Species cardinality	2008-10-21T09:26Z	Estimating species cardinality using Wilmanns cover-abundance scale (Wilmanns 1973)	PlotCalais15
taxonIdCalais066	phytosociological survey estimating species cardinality (a combiantion of species cover and abundance) in a 10x10m plot	+	Category Species cardinality	2008-10-21T09:26Z	Estimating species cardinality using Wilmanns cover-abundance scale (Wilmanns 1973)	PlotCalais15
taxonIdCalais068	phytosociological survey estimating species cardinality (a combiantion of species cover and abundance) in a 10x10m plot	+	Category Species cardinality	2008-10-21T09:26Z	Estimating species cardinality using Wilmanns cover-abundance scale (Wilmanns 1973)	PlotCalais15
taxonIdCalais070	phytosociological survey estimating species cardinality (a combiantion of species cover and abundance) in a 10x10m plot	r	Category Species cardinality	2008-10-21T09:26Z	Estimating species cardinality using Wilmanns cover-abundance scale (Wilmanns 1973)	PlotCalais15
taxonIdCalais074	phytosociological survey estimating species cardinality (a combiantion of species cover and abundance) in a 10x10m plot	1	Category Species cardinality	2008-10-21T09:26Z	Estimating species cardinality using Wilmanns cover-abundance scale (Wilmanns 1973)	PlotCalais15
taxonIdCalais076	phytosociological survey estimating species cardinality (a combiantion of species cover and abundance) in a 10x10m plot	2m	Category Species cardinality	2008-10-21T09:26Z	Estimating species cardinality using Wilmanns cover-abundance scale (Wilmanns 1973)	PlotCalais15
taxonIdCalais078	phytosociological survey estimating species cardinality (a combiantion of species cover and abundance) in a 10x10m plot	1	Category Species cardinality	2008-10-21T09:26Z	Estimating species cardinality using Wilmanns cover-abundance scale (Wilmanns 1973)	PlotCalais15
taxonIdCalais081	phytosociological survey estimating species cardinality (a combiantion of species cover and abundance) in a 10x10m plot	3	Category Species cardinality	2008-10-21T09:26Z	Estimating species cardinality using Wilmanns cover-abundance scale (Wilmanns 1973)	PlotCalais15
taxonIdCalais082	phytosociological survey estimating species cardinality (a combiantion of species cover and abundance) in a 10x10m plot	1	Category Species cardinality	2008-10-21T09:26Z	Estimating species cardinality using Wilmanns cover-abundance scale (Wilmanns 1973)	PlotCalais15
taxonIdCalais083	phytosociological survey estimating species cardinality (a combiantion of species cover and abundance) in a 10x10m plot	1	Category Species cardinality	2008-10-21T09:26Z	Estimating species cardinality using Wilmanns cover-abundance scale (Wilmanns 1973)	PlotCalais15
taxonIdCalais091	phytosociological survey estimating species cardinality (a combiantion of species cover and abundance) in a 10x10m plot	1	Category Species cardinality	2008-10-21T09:26Z	Estimating species cardinality using Wilmanns cover-abundance scale (Wilmanns 1973)	PlotCalais15
taxonIdCalais093	phytosociological survey estimating species cardinality (a combiantion of species cover and abundance) in a 10x10m plot	1	Category Species cardinality	2008-10-21T09:26Z	Estimating species cardinality using Wilmanns cover-abundance scale (Wilmanns 1973)	PlotCalais15
taxonIdCalais097	phytosociological survey estimating species cardinality (a combiantion of species cover and abundance) in a 10x10m plot	+	Category Species cardinality	2008-10-21T09:26Z	Estimating species cardinality using Wilmanns cover-abundance scale (Wilmanns 1973)	PlotCalais15
taxonIdCalais101	phytosociological survey estimating species cardinality (a combiantion of species cover and abundance) in a 10x10m plot	r	Category Species cardinality	2008-10-21T09:26Z	Estimating species cardinality using Wilmanns cover-abundance scale (Wilmanns 1973)	PlotCalais15
taxonIdCalais102	phytosociological survey estimating species cardinality (a combiantion of species cover and abundance) in a 10x10m plot	2m	Category Species cardinality	2008-10-21T09:26Z	Estimating species cardinality using Wilmanns cover-abundance scale (Wilmanns 1973)	PlotCalais15
taxonIdCalais104	phytosociological survey estimating species cardinality (a combiantion of species cover and abundance) in a 10x10m plot	+	Category Species cardinality	2008-10-21T09:26Z	Estimating species cardinality using Wilmanns cover-abundance scale (Wilmanns 1973)	PlotCalais15
taxonIdCalais106	phytosociological survey estimating species cardinality (a combiantion of species cover and abundance) in a 10x10m plot	r	Category Species cardinality	2008-10-21T09:26Z	Estimating species cardinality using Wilmanns cover-abundance scale (Wilmanns 1973)	PlotCalais15
