# Supplementary material for: Vascular plant community composition from the campos rupestres of the Itacolomi State Park, Brazil
Source: Biodivers Data J. 2015 Feb 27;(3):e4507. doi: 10.3897/BDJ.3.e4507 (PMC4355493; doi:10.3897/BDJ.3.e4507)
Supplement: Supplementary material 2 — Calais [file biodiversity_data_journal-3-e4507-s002.zip › camporupestre-15plot-survey-sampling-itacolomi-calais107-checklist/meta.xml]

<archive xmlns="http://rs.tdwg.org/dwc/text/" metadata="eml.xml">
  <core encoding="UTF-8" fieldsTerminatedBy="\t" linesTerminatedBy="\n" fieldsEnclosedBy="" ignoreHeaderLines="1" rowType="http://rs.tdwg.org/dwc/terms/Taxon">
    <files>
      <location>taxon.txt</location>
    </files>
		<id index="0"/>
		<field index="1" term="http://rs.tdwg.org/dwc/terms/taxonID"/>
		<field index="2" term="http://purl.org/dc/terms/modified"/>
		<field index="3" term="http://purl.org/dc/terms/bibliographicCitation"/>
		<field index="4" term="http://purl.org/dc/terms/references"/>
		<field index="5" term="http://rs.tdwg.org/dwc/terms/acceptedNameUsageID"/>
		<field index="6" term="http://rs.tdwg.org/dwc/terms/parentNameUsageID"/>
		<field index="7" term="http://rs.tdwg.org/dwc/terms/nameAccordingToID"/>
		<field index="8" term="http://rs.tdwg.org/dwc/terms/scientificName"/>
		<field index="9" term="http://rs.tdwg.org/dwc/terms/acceptedNameUsage"/>
		<field index="10" term="http://rs.tdwg.org/dwc/terms/parentNameUsage"/>
		<field index="11" term="http://rs.tdwg.org/dwc/terms/nameAccordingTo"/>
		<field index="12" term="http://rs.tdwg.org/dwc/terms/higherClassification"/>
		<field index="13" term="http://rs.tdwg.org/dwc/terms/class"/>
		<field index="14" term="http://rs.tdwg.org/dwc/terms/order"/>
		<field index="15" term="http://rs.tdwg.org/dwc/terms/family"/>
		<field index="16" term="http://rs.tdwg.org/dwc/terms/genus"/>
		<field index="17" term="http://rs.tdwg.org/dwc/terms/subgenus"/>
		<field index="18" term="http://rs.tdwg.org/dwc/terms/specificEpithet"/>
		<field index="19" term="http://rs.tdwg.org/dwc/terms/infraSpecificEpithet"/>
		<field index="20" term="http://rs.tdwg.org/dwc/terms/taxonRank"/>
		<field index="21" term="http://rs.tdwg.org/dwc/terms/scientificNameAuthorship"/>
		<field index="22" term="http://rs.tdwg.org/dwc/terms/taxonomicStatus"/>
		<field default="en" term="http://purl.org/dc/terms/language"/>
		<field default="http://creativecommons.org/publicdomain/zero/1.0/ &amp; http://www.canadensys.net/norms" term="http://purl.org/dc/terms/rights"/>
		<field default="Federal University of Vicosa (UFV/LEEP)" term="http://purl.org/dc/terms/rightsHolder"/>
		<field default="camporupestre-15plot-survey-sampling-itacolomi-calais107-checklist" term="http://rs.tdwg.org/dwc/terms/datasetName"/>
		<field default="Plantae" term="http://rs.tdwg.org/dwc/terms/kingdom"/>
		<field default="ICBN" term="http://rs.tdwg.org/dwc/terms/nomenclaturalCode"/>
	</core>
  <extension encoding="UTF-8" fieldsTerminatedBy="\t" linesTerminatedBy="\n" fieldsEnclosedBy="" ignoreHeaderLines="1" rowType="http://rs.tdwg.org/dwc/terms/MeasurementOrFact">
    <files>
      <location>measurementorfactspeciescardinality.txt</location>
    </files>
    <coreid index="0" />
    <field index="1" term="http://rs.tdwg.org/dwc/terms/measurementType"/>
    <field index="2" term="http://rs.tdwg.org/dwc/terms/measurementValue"/>
    <field index="3" term="http://rs.tdwg.org/dwc/terms/measurementUnit"/>
    <field index="4" term="http://rs.tdwg.org/dwc/terms/measurementDeterminedDate"/>
    <field index="5" term="http://rs.tdwg.org/dwc/terms/measurementMethod"/>
    <field index="6" term="http://rs.tdwg.org/dwc/terms/measurementRemarks"/>
  </extension>
  <extension encoding="UTF-8" fieldsTerminatedBy="\t" linesTerminatedBy="\n" fieldsEnclosedBy="" ignoreHeaderLines="1" rowType="http://rs.tdwg.org/dwc/terms/MeasurementOrFact">
    <files>
      <location>measurementorfactsoil.txt</location>
    </files>
    <coreid index="0" />
    <field index="1" term="http://rs.tdwg.org/dwc/terms/measurementType"/>
    <field index="2" term="http://rs.tdwg.org/dwc/terms/measurementValue"/>
    <field index="3" term="http://rs.tdwg.org/dwc/terms/measurementUnit"/>
    <field index="4" term="http://rs.tdwg.org/dwc/terms/measurementDeterminedDate"/>
    <field index="5" term="http://rs.tdwg.org/dwc/terms/measurementMethod"/>
    <field index="6" term="http://rs.tdwg.org/dwc/terms/measurementRemarks"/>
  </extension>
  <extension encoding="UTF-8" fieldsTerminatedBy="\t" linesTerminatedBy="\n" fieldsEnclosedBy="" ignoreHeaderLines="1" rowType="http://rs.gbif.org/terms/1.0/Distribution">
    <files>
      <location>distribution.txt</location>
    </files>
    <coreid index="0" />
    <field index="1" term="http://rs.tdwg.org/dwc/terms/locationID"/>
    <field index="2" term="http://rs.tdwg.org/dwc/terms/locality"/>
    <field index="3" term="http://rs.tdwg.org/dwc/terms/countryCode"/>
    <field index="4" term="http://rs.tdwg.org/dwc/terms/occurrenceStatus"/>
    <field index="5" term="http://rs.tdwg.org/dwc/terms/establishmentMeans"/>
    <field index="6" term="http://rs.tdwg.org/dwc/terms/eventDate"/>
    <field index="7" term="http://purl.org/dc/terms/source"/>
    <field index="8" term="http://rs.tdwg.org/dwc/terms/occurrenceRemarks"/>
  </extension>
  <extension encoding="UTF-8" fieldsTerminatedBy="\t" linesTerminatedBy="\n" fieldsEnclosedBy="" ignoreHeaderLines="1" rowType="http://rs.gbif.org/terms/1.0/Description">
    <files>
      <location>habit.txt</location>
    </files>
		<coreid index="0"/>
		<field index="1" term="http://purl.org/dc/terms/description"/>
		<field default="habit" term="http://purl.org/dc/terms/type"/>
		<field default="en-US" term="http://purl.org/dc/terms/language"/>	
  </extension>
</archive>
