# Supplementary material for: Vascular plant community composition from the campos rupestres of the Itacolomi State Park, Brazil
Source: Biodivers Data J. 2015 Feb 27;(3):e4507. doi: 10.3897/BDJ.3.e4507 (PMC4355493; doi:10.3897/BDJ.3.e4507)
Supplement: Supplementary material 2 — Calais [file biodiversity_data_journal-3-e4507-s002.zip › camporupestre-15plot-survey-sampling-itacolomi-calais107-checklist/taxon.txt]

id	taxonID	modified	bibliographicCitation	references	acceptedNameUsageID	parentNameUsageID	nameAccordingToID	scientificName	acceptedNameUsage	parentNameUsage	nameAccordingTo	higherClassification	class	order	family	genus	subgenus	specificEpithet	infraSpecificEpithet	taxonRank	scientificNameAuthorship	taxonomicStatus
taxonIdCalais001	taxonIdCalais001	2014-09-29T12:19-0500	ISSN 1927-0488 E-ISSN 1927-0496	http://dx.doi.org/10.5539/enrr.v2n3p115	taxonIdCalais001		http://www.tropicos.org/Name/100950	Ruellia macrantha					Equisetopsida	Lamiales	Acanthaceae	Ruellia		macrantha		species	Lindau	accepted
taxonIdCalais002	taxonIdCalais002	2014-09-29T12:19-0500	ISSN 1927-0488 E-ISSN 1927-0496	http://dx.doi.org/10.5539/enrr.v2n3p115	taxonIdCalais002		http://www.tropicos.org/Name/42000073	Amaranthaceae					Equisetopsida	Caryophyllales	Amaranthaceae					family	Juss.	accepted
taxonIdCalais003	taxonIdCalais003	2014-09-29T12:19-0500	ISSN 1927-0488 E-ISSN 1927-0496	http://dx.doi.org/10.5539/enrr.v2n3p115	taxonIdCalais003		http://www.tropicos.org/Name/1200417	Hypoxis decumbens					Equisetopsida	Asparagales	Hypoxidaceae	Hypoxis		decumbens		species	L.	accepted
taxonIdCalais004	taxonIdCalais004	2014-09-29T12:19-0500	ISSN 1927-0488 E-ISSN 1927-0496	http://dx.doi.org/10.5539/enrr.v2n3p115	taxonIdCalais004		http://www.tropicos.org/Name/100346035	Guatteria villosissima					Equisetopsida	Magnoliales	Annonaceae	Guatteria		villosissima		species	A. St.-Hil.	accepted
taxonIdCalais005	taxonIdCalais005	2014-09-29T12:19-0500	ISSN 1927-0488 E-ISSN 1927-0496	http://dx.doi.org/10.5539/enrr.v2n3p115	taxonIdCalais005		http://www.tropicos.org/Name/2601952	Oxypetalum appendiculatum					Equisetopsida	Gentianales	Apocynaceae	Oxypetalum		appendiculatum		species	Mart.	accepted
taxonIdCalais006	taxonIdCalais006	2014-09-29T12:19-0500	ISSN 1927-0488 E-ISSN 1927-0496	http://dx.doi.org/10.5539/enrr.v2n3p115	taxonIdCalais006		http://www.tropicos.org/Name/2717091	Acanthospermum australe					Equisetopsida	Asterales	Asteraceae	Acanthospermum		australe		species	(Loefl.) Kuntze	accepted
taxonIdCalais007	taxonIdCalais007	2014-09-29T12:19-0500	ISSN 1927-0488 E-ISSN 1927-0496	http://dx.doi.org/10.5539/enrr.v2n3p115	taxonIdCalais007		http://www.tropicos.org/Name/2717100	Achyrocline satureioides					Equisetopsida	Asterales	Asteraceae	Achyrocline		satureioides		species	(Lam.) DC.	accepted
taxonIdCalais008	taxonIdCalais008	2014-09-29T12:19-0500	ISSN 1927-0488 E-ISSN 1927-0496	http://dx.doi.org/10.5539/enrr.v2n3p115	taxonIdCalais008		http://www.tropicos.org/Name/2704883	Baccharis sessiliflora					Equisetopsida	Asterales	Asteraceae	Baccharis		sessiliflora		species	Vahl	accepted
taxonIdCalais009	taxonIdCalais009	2014-09-29T12:19-0500	ISSN 1927-0488 E-ISSN 1927-0496	http://dx.doi.org/10.5539/enrr.v2n3p115	taxonIdCalais009		http://www.tropicos.org/Name/2700274	Baccharis dracunculifolia					Equisetopsida	Asterales	Asteraceae	Baccharis		dracunculifolia		species	DC.	accepted
taxonIdCalais010	taxonIdCalais010	2014-09-29T12:19-0500	ISSN 1927-0488 E-ISSN 1927-0496	http://dx.doi.org/10.5539/enrr.v2n3p115	taxonIdCalais010			Baccharis serrulata					Equisetopsida	Asterales	Asteraceae	Baccharis		serrulata		species	(Lam.) Pers.	accepted
taxonIdCalais011	taxonIdCalais011	2014-09-29T12:19-0500	ISSN 1927-0488 E-ISSN 1927-0496	http://dx.doi.org/10.5539/enrr.v2n3p115	taxonIdCalais011		http://www.tropicos.org/Name/40023714	Baccharis					Equisetopsida	Asterales	Asteraceae	Baccharis				genus	L.	accepted
taxonIdCalais012	taxonIdCalais012	2014-09-29T12:19-0500	ISSN 1927-0488 E-ISSN 1927-0496	http://dx.doi.org/10.5539/enrr.v2n3p115	taxonIdCalais012		http://www.tropicos.org/Name/2709746	Chaptalia nutans					Equisetopsida	Asterales	Asteraceae	Chaptalia		nutans		species	(L.) Pol.	accepted
taxonIdCalais013	taxonIdCalais013	2014-09-29T12:19-0500	ISSN 1927-0488 E-ISSN 1927-0496	http://dx.doi.org/10.5539/enrr.v2n3p115	taxonIdCalais013		http://www.tropicos.org/Name/50159239	Eremanthus erythropappus					Equisetopsida	Asterales	Asteraceae	Eremanthus		erythropappus		species	(DC.) MacLeish	accepted
taxonIdCalais014	taxonIdCalais014	2014-09-29T12:19-0500	ISSN 1927-0488 E-ISSN 1927-0496	http://dx.doi.org/10.5539/enrr.v2n3p115	taxonIdCalais014		http://www.tropicos.org/Name/2705517	Eremanthus incanus					Equisetopsida	Asterales	Asteraceae	Eremanthus		incanus		species	(Less.) Less.	accepted
taxonIdCalais015	taxonIdCalais015	2014-09-29T12:19-0500	ISSN 1927-0488 E-ISSN 1927-0496	http://dx.doi.org/10.5539/enrr.v2n3p115	taxonIdCalais015		http://www.tropicos.org/Name/40007075	Eupatorium					Equisetopsida	Asterales	Asteraceae	Eupatorium				genus	L.	accepted
taxonIdCalais016	taxonIdCalais016	2014-09-29T12:19-0500	ISSN 1927-0488 E-ISSN 1927-0496	http://dx.doi.org/10.5539/enrr.v2n3p115	taxonIdCalais016		http://www.tropicos.org/Name/2707009	Mikania nummularia					Equisetopsida	Asterales	Asteraceae	Mikania		nummularia		species	DC.	accepted
taxonIdCalais017	taxonIdCalais017	2014-09-29T12:19-0500	ISSN 1927-0488 E-ISSN 1927-0496	http://dx.doi.org/10.5539/enrr.v2n3p115	taxonIdCalais017		http://www.tropicos.org/Name/2736152	Pterocaulon lanatum					Equisetopsida	Asterales	Asteraceae	Pterocaulon		lanatum		species	Kuntze	accepted
taxonIdCalais018	taxonIdCalais018	2014-09-29T12:19-0500	ISSN 1927-0488 E-ISSN 1927-0496	http://dx.doi.org/10.5539/enrr.v2n3p115	taxonIdCalais018		http://www.tropicos.org/Name/2707534	Senecio adamantinus					Equisetopsida	Asterales	Asteraceae	Senecio		adamantinus		species	Bong.	accepted
taxonIdCalais019	taxonIdCalais019	2014-09-29T12:19-0500	ISSN 1927-0488 E-ISSN 1927-0496	http://dx.doi.org/10.5539/enrr.v2n3p115	taxonIdCalais019		http://www.tropicos.org/Name/2708306	Stevia clausseni					Equisetopsida	Asterales	Asteraceae	Stevia		clausseni		species	Sch. Bip. ex Baker	accepted
taxonIdCalais020	taxonIdCalais020	2014-09-29T12:19-0500	ISSN 1927-0488 E-ISSN 1927-0496	http://dx.doi.org/10.5539/enrr.v2n3p115	taxonIdCalais020		http://www.tropicos.org/Name/40017545	Trichogonia					Equisetopsida	Asterales	Asteraceae	Trichogonia				genus	(DC.) Gardner	accepted
taxonIdCalais021	taxonIdCalais021	2014-09-29T12:19-0500	ISSN 1927-0488 E-ISSN 1927-0496	http://dx.doi.org/10.5539/enrr.v2n3p115	taxonIdCalais021		http://www.tropicos.org/Name/50233921	Eremanthus crotonoides					Equisetopsida	Asterales	Asteraceae	Eremanthus		crotonoides		species	(DC.) Sch. Bip.	accepted
taxonIdCalais022	taxonIdCalais022	2014-09-29T12:19-0500	ISSN 1927-0488 E-ISSN 1927-0496	http://dx.doi.org/10.5539/enrr.v2n3p115	taxonIdCalais022		http://www.tropicos.org/Name/2735157	Cyrtocymura scorpioides					Equisetopsida	Asterales	Asteraceae	Cyrtocymura		scorpioides		species	(Lam.) H. Rob.	accepted
taxonIdCalais023	taxonIdCalais023	2014-09-29T12:19-0500	ISSN 1927-0488 E-ISSN 1927-0496	http://dx.doi.org/10.5539/enrr.v2n3p115	taxonIdCalais023		http://www.tropicos.org/Name/40023887	Vernonia					Equisetopsida	Asterales	Asteraceae	Vernonia				genus	Schreb.	accepted
taxonIdCalais024	taxonIdCalais024	2014-09-29T12:19-0500	ISSN 1927-0488 E-ISSN 1927-0496	http://dx.doi.org/10.5539/enrr.v2n3p115	taxonIdCalais024		http://www.tropicos.org/Name/40023887	Vernonia					Equisetopsida	Asterales	Asteraceae	Vernonia				genus	Schreb.	accepted
taxonIdCalais025	taxonIdCalais025	2014-09-29T12:19-0500	ISSN 1927-0488 E-ISSN 1927-0496	http://dx.doi.org/10.5539/enrr.v2n3p115	taxonIdCalais025		http://www.tropicos.org/Name/26601471	Blechnum tabulare					Equisetopsida	Polypodiales	Blechnaceae	Blechnum		imperiale		species	(Thunb.) Kuhn	accepted
taxonIdCalais026	taxonIdCalais026	2014-09-29T12:19-0500	ISSN 1927-0488 E-ISSN 1927-0496	http://dx.doi.org/10.5539/enrr.v2n3p115	taxonIdCalais026		http://www.tropicos.org/Name/4001245	Varronia curassavica					Equisetopsida	Boraginales	Boraginaceae	Varronia		curassavica		species	Jacq.	accepted
taxonIdCalais027	taxonIdCalais027	2014-09-29T12:19-0500	ISSN 1927-0488 E-ISSN 1927-0496	http://dx.doi.org/10.5539/enrr.v2n3p115	taxonIdCalais027		http://www.tropicos.org/Name/8300718	Dichorisandra thyrsiflora					Equisetopsida	Commelinales	Commelinaceae	Dichorisandra		thyrsiflora		species	J.C. Mikan	accepted
taxonIdCalais028	taxonIdCalais028	2014-09-29T12:19-0500	ISSN 1927-0488 E-ISSN 1927-0496	http://dx.doi.org/10.5539/enrr.v2n3p115	taxonIdCalais028		http://www.tropicos.org/Name/8300224	Tradescantia ambigua					Equisetopsida	Commelinales	Commelinaceae	Tradescantia		ambigua		species	Mart.	accepted
taxonIdCalais029	taxonIdCalais029	2014-09-29T12:19-0500	ISSN 1927-0488 E-ISSN 1927-0496	http://dx.doi.org/10.5539/enrr.v2n3p115	taxonIdCalais029		http://www.tropicos.org/Name/9903754	Trilepis microstachya					Equisetopsida	Poales	Cyperaceae	Fintelmannia		microstachya		species	(C.B. Clarke) H. Pfeiff.	accepted
taxonIdCalais030	taxonIdCalais030	2014-09-29T12:19-0500	ISSN 1927-0488 E-ISSN 1927-0496	http://dx.doi.org/10.5539/enrr.v2n3p115	taxonIdCalais030		http://www.tropicos.org/Name/9902358	Rhynchospora tenuis					Equisetopsida	Poales	Cyperaceae	Rhynchospora		tenuis		species	Willd. ex Link	accepted
taxonIdCalais031	taxonIdCalais031	2014-09-29T12:19-0500	ISSN 1927-0488 E-ISSN 1927-0496	http://dx.doi.org/10.5539/enrr.v2n3p115	taxonIdCalais031		http://www.tropicos.org/Name/9902347	Rhynchospora corymbosa					Equisetopsida	Poales	Cyperaceae	Rhynchospora		corymbosa		species	(L.) Britton	accepted
taxonIdCalais032	taxonIdCalais032	2014-09-29T12:19-0500	ISSN 1927-0488 E-ISSN 1927-0496	http://dx.doi.org/10.5539/enrr.v2n3p115	taxonIdCalais032		http://www.tropicos.org/Name/40025466	Rhynchospora					Equisetopsida	Poales	Cyperaceae	Rhynchospora				genus	Vahl	accepted
taxonIdCalais033	taxonIdCalais033	2014-09-29T12:19-0500	ISSN 1927-0488 E-ISSN 1927-0496	http://dx.doi.org/10.5539/enrr.v2n3p115	taxonIdCalais033		http://www.tropicos.org/Name/40033443	Scleria					Equisetopsida	Poales	Cyperaceae	Scleria				genus	P.J. Bergius	accepted
taxonIdCalais034	taxonIdCalais034	2014-09-29T12:19-0500	ISSN 1927-0488 E-ISSN 1927-0496	http://dx.doi.org/10.5539/enrr.v2n3p115	taxonIdCalais034		http://www.tropicos.org/Name/9901341	Scleria hirtella					Equisetopsida	Poales	Cyperaceae	Scleria		hirtella		species	Sw.	accepted
taxonIdCalais035	taxonIdCalais035	2014-09-29T12:19-0500	ISSN 1927-0488 E-ISSN 1927-0496	http://dx.doi.org/10.5539/enrr.v2n3p115	taxonIdCalais035		http://www.tropicos.org/Name/42000356	Cyperaceae					Equisetopsida	Poales	Cyperaceae					family	Juss.	accepted
taxonIdCalais036	taxonIdCalais036	2014-09-29T12:19-0500	ISSN 1927-0488 E-ISSN 1927-0496	http://dx.doi.org/10.5539/enrr.v2n3p115	taxonIdCalais036		http://www.tropicos.org/Name/42000356	Cyperaceae					Equisetopsida	Poales	Cyperaceae					family	Juss.	accepted
taxonIdCalais037	taxonIdCalais037	2014-09-29T12:19-0500	ISSN 1927-0488 E-ISSN 1927-0496	http://dx.doi.org/10.5539/enrr.v2n3p115	taxonIdCalais037		http://www.tropicos.org/Name/42000356	Cyperaceae					Equisetopsida	Poales	Cyperaceae					family	Juss.	accepted
taxonIdCalais038	taxonIdCalais038	2014-09-29T12:19-0500	ISSN 1927-0488 E-ISSN 1927-0496	http://dx.doi.org/10.5539/enrr.v2n3p115	taxonIdCalais038		http://www.tropicos.org/Name/26606822	Pteridium arachnoideum					Equisetopsida	Polypodiales	Dennstaedtiaceae	Pteridium		arachnoideum		species	(Kaulf.) Maxon	accepted
taxonIdCalais039	taxonIdCalais039	2014-09-29T12:19-0500	ISSN 1927-0488 E-ISSN 1927-0496	http://dx.doi.org/10.5539/enrr.v2n3p115	taxonIdCalais039		http://www.tropicos.org/Name/40031872	Dioscorea					Equisetopsida	Dioscoreales	Dioscoreaceae	Dioscorea				genus	L.	accepted
taxonIdCalais040	taxonIdCalais040	2014-09-29T12:19-0500	ISSN 1927-0488 E-ISSN 1927-0496	http://dx.doi.org/10.5539/enrr.v2n3p115	taxonIdCalais040		http://www.tropicos.org/Name/13007573	Aeschynomene elegans					Equisetopsida	Fabales	Fabaceae	Aeschynomene		elegans		species	Schltdl. & Cham.	accepted
taxonIdCalais041	taxonIdCalais041	2014-09-29T12:19-0500	ISSN 1927-0488 E-ISSN 1927-0496	http://dx.doi.org/10.5539/enrr.v2n3p115	taxonIdCalais041		http://www.tropicos.org/Name/13044896	Chamaecrista flexuosa					Equisetopsida	Fabales	Fabaceae	Chamaecrista		flexuosa		species	(L.) Greene	accepted
taxonIdCalais042	taxonIdCalais042	2014-09-29T12:19-0500	ISSN 1927-0488 E-ISSN 1927-0496	http://dx.doi.org/10.5539/enrr.v2n3p115	taxonIdCalais042		http://www.tropicos.org/Name/13044964	Chamaecrista rotundifolia					Equisetopsida	Fabales	Fabaceae	Chamaecrista		rotundifolia		species	(Pers.) Greene	accepted
taxonIdCalais043	taxonIdCalais043	2014-09-29T12:19-0500	ISSN 1927-0488 E-ISSN 1927-0496	http://dx.doi.org/10.5539/enrr.v2n3p115	taxonIdCalais043		http://www.tropicos.org/Name/40016956	Crotalaria					Equisetopsida	Fabales	Fabaceae	Crotalaria				genus	L.	accepted
taxonIdCalais044	taxonIdCalais044	2014-09-29T12:19-0500	ISSN 1927-0488 E-ISSN 1927-0496	http://dx.doi.org/10.5539/enrr.v2n3p115	taxonIdCalais044		http://www.tropicos.org/Name/13013946	Dalbergia brasiliensis					Equisetopsida	Fabales	Fabaceae	Dalbergia		brasiliensis		species	Vogel	accepted
taxonIdCalais045	taxonIdCalais045	2014-09-29T12:19-0500	ISSN 1927-0488 E-ISSN 1927-0496	http://dx.doi.org/10.5539/enrr.v2n3p115	taxonIdCalais045		http://www.tropicos.org/Name/13018304	Desmodium adscendens					Equisetopsida	Fabales	Fabaceae	Desmodium		adscendens		species	(Sw.) DC.	accepted
taxonIdCalais046	taxonIdCalais046	2014-09-29T12:19-0500	ISSN 1927-0488 E-ISSN 1927-0496	http://dx.doi.org/10.5539/enrr.v2n3p115	taxonIdCalais046		http://www.tropicos.org/Name/13048275	Desmodium barbatum					Equisetopsida	Fabales	Fabaceae	Desmodium		barbatum		species	(L.) Benth.	accepted
taxonIdCalais047	taxonIdCalais047	2014-09-29T12:19-0500	ISSN 1927-0488 E-ISSN 1927-0496	http://dx.doi.org/10.5539/enrr.v2n3p115	taxonIdCalais047		http://www.tropicos.org/Name/13021381	Inga sessilis					Equisetopsida	Fabales	Fabaceae	Inga		sessilis		species	(Vell.) Mart.	accepted
taxonIdCalais048	taxonIdCalais048	2014-09-29T12:19-0500	ISSN 1927-0488 E-ISSN 1927-0496	http://dx.doi.org/10.5539/enrr.v2n3p115	taxonIdCalais048			Fabaceae					Equisetopsida	Fabales							Lindley, John	accepted
taxonIdCalais049	taxonIdCalais049	2014-09-29T12:19-0500	ISSN 1927-0488 E-ISSN 1927-0496	http://dx.doi.org/10.5539/enrr.v2n3p115	taxonIdCalais049		http://www.tropicos.org/Name/13012020	Periandra mediterranea					Equisetopsida	Fabales	Fabaceae	Periandra		mediterranea		species	(Vell.) Taub.	accepted
taxonIdCalais050	taxonIdCalais050	2014-09-29T12:19-0500	ISSN 1927-0488 E-ISSN 1927-0496	http://dx.doi.org/10.5539/enrr.v2n3p115	taxonIdCalais050		http://www.tropicos.org/Name/13041487	Senna reniformis					Equisetopsida	Fabales	Fabaceae	Senna		reniformis		species	(G. Don) H.S. Irwin & Barneby	accepted
taxonIdCalais051	taxonIdCalais051	2014-09-29T12:19-0500	ISSN 1927-0488 E-ISSN 1927-0496	http://dx.doi.org/10.5539/enrr.v2n3p115	taxonIdCalais051		http://www.tropicos.org/Name/13001655	Stylosanthes viscosa					Equisetopsida	Fabales	Fabaceae	Stylosanthes		viscosa		species	(L.) Sw.	accepted
taxonIdCalais052	taxonIdCalais052	2014-09-29T12:19-0500	ISSN 1927-0488 E-ISSN 1927-0496	http://dx.doi.org/10.5539/enrr.v2n3p115	taxonIdCalais052		http://www.tropicos.org/Name/13013077	Zornia reticulata					Equisetopsida	Fabales	Fabaceae	Zornia		reticulata		species	Sm.	accepted
taxonIdCalais053	taxonIdCalais053	2014-09-29T12:19-0500	ISSN 1927-0488 E-ISSN 1927-0496	http://dx.doi.org/10.5539/enrr.v2n3p115	taxonIdCalais053		http://www.tropicos.org/Name/13200167	Casearia sylvestris					Equisetopsida	Malpighiales	Salicaceae	Casearia		sylvestris		species	Sw.	accepted
taxonIdCalais054	taxonIdCalais054	2014-09-29T12:19-0500	ISSN 1927-0488 E-ISSN 1927-0496	http://dx.doi.org/10.5539/enrr.v2n3p115	taxonIdCalais054		http://www.tropicos.org/Name/26602000	Dicranopteris flexuosa					Equisetopsida	Gleicheniales	Gleicheniaceae	Dicranopteris		flexuosa		species	(Schrad.) Underw.	accepted
taxonIdCalais055	taxonIdCalais055	2014-09-29T12:19-0500	ISSN 1927-0488 E-ISSN 1927-0496	http://dx.doi.org/10.5539/enrr.v2n3p115	taxonIdCalais055		http://www.tropicos.org/Name/16600446	Sisyrinchium vaginatum					Equisetopsida	Asparagales	Iridaceae	Sisyrinchium		vaginatum		species	Spreng.	accepted
taxonIdCalais056	taxonIdCalais056	2014-09-29T12:19-0500	ISSN 1927-0488 E-ISSN 1927-0496	http://dx.doi.org/10.5539/enrr.v2n3p115	taxonIdCalais056		http://www.tropicos.org/Name/100224239	Mesosphaerum homalophyllum					Equisetopsida	Lamiales	Lamiaceae	Hyptis		homolophylla		species	(Pohl ex Benth.) Kuntze	accepted
taxonIdCalais057	taxonIdCalais057	2014-09-29T12:19-0500	ISSN 1927-0488 E-ISSN 1927-0496	http://dx.doi.org/10.5539/enrr.v2n3p115	taxonIdCalais057		http://www.tropicos.org/Name/19200261	Cuphea carthagenensis					Equisetopsida	Myrtales	Lythraceae	Cuphea		carthagenensis		species	(Jacq.) J.F. Macbr.	accepted
taxonIdCalais058	taxonIdCalais058	2014-09-29T12:19-0500	ISSN 1927-0488 E-ISSN 1927-0496	http://dx.doi.org/10.5539/enrr.v2n3p115	taxonIdCalais058		http://www.tropicos.org/Name/40018298	Cuphea					Equisetopsida	Myrtales	Lythraceae	Cuphea				genus	P. Browne	accepted
taxonIdCalais059	taxonIdCalais059	2014-09-29T12:19-0500	ISSN 1927-0488 E-ISSN 1927-0496	http://dx.doi.org/10.5539/enrr.v2n3p115	taxonIdCalais059		http://www.tropicos.org/Name/19200159	Diplusodon buxifolius					Equisetopsida	Myrtales	Lythraceae	Diplusodon		buxifolius		species	Cham. & Schltdl.	accepted
taxonIdCalais060	taxonIdCalais060	2014-09-29T12:19-0500	ISSN 1927-0488 E-ISSN 1927-0496	http://dx.doi.org/10.5539/enrr.v2n3p115	taxonIdCalais060		http://www.tropicos.org/Name/50042843	Banisteriopsis campestris					Equisetopsida	Malpighiales	Malpighiaceae	Banisteriopsis		campestris		species	(A. Juss.) Little	accepted
taxonIdCalais061	taxonIdCalais061	2014-09-29T12:19-0500	ISSN 1927-0488 E-ISSN 1927-0496	http://dx.doi.org/10.5539/enrr.v2n3p115	taxonIdCalais061		http://www.tropicos.org/Name/19500239	Byrsonima variabilis					Equisetopsida	Malpighiales	Malpighiaceae	Byrsonima		variabilis		species	A. Juss.	accepted
taxonIdCalais062	taxonIdCalais062	2014-09-29T12:19-0500	ISSN 1927-0488 E-ISSN 1927-0496	http://dx.doi.org/10.5539/enrr.v2n3p115	taxonIdCalais062		http://www.tropicos.org/Name/40025267	Heteropterys					Equisetopsida	Malpighiales	Malpighiaceae	Heteropteris				genus	Kunth	accepted
taxonIdCalais063	taxonIdCalais063	2014-09-29T12:19-0500	ISSN 1927-0488 E-ISSN 1927-0496	http://dx.doi.org/10.5539/enrr.v2n3p115	taxonIdCalais063		http://www.tropicos.org/Name/19600093	Sida linifolia					Equisetopsida	Malvales	Malvaceae	Sida		linifolia		species	Cav.	accepted
taxonIdCalais064	taxonIdCalais064	2014-09-29T12:19-0500	ISSN 1927-0488 E-ISSN 1927-0496	http://dx.doi.org/10.5539/enrr.v2n3p115	taxonIdCalais064		http://www.tropicos.org/Name/40026507	Wissadula					Equisetopsida	Malvales	Malvaceae	Wissadula				genus	Medik.	accepted
taxonIdCalais065	taxonIdCalais065	2014-09-29T12:19-0500	ISSN 1927-0488 E-ISSN 1927-0496	http://dx.doi.org/10.5539/enrr.v2n3p115	taxonIdCalais065		http://www.tropicos.org/Name/20300440	Cambessedesia hilariana					Equisetopsida	Myrtales	Melastomataceae	Cambessedesia		hilariana		species	(Kunth) DC.	accepted
taxonIdCalais066	taxonIdCalais066	2014-09-29T12:19-0500	ISSN 1927-0488 E-ISSN 1927-0496	http://dx.doi.org/10.5539/enrr.v2n3p115	taxonIdCalais066		http://www.tropicos.org/Name/50114312	Miconia pepericarpa					Equisetopsida	Myrtales	Melastomataceae	Miconia		pepericarpa		species	Mart. ex DC.	accepted
taxonIdCalais067	taxonIdCalais067	2014-09-29T12:19-0500	ISSN 1927-0488 E-ISSN 1927-0496	http://dx.doi.org/10.5539/enrr.v2n3p115	taxonIdCalais067		http://www.tropicos.org/Name/40018467	Miconia					Equisetopsida	Myrtales	Melastomataceae	Miconia				genus	Ruiz & Pav.	accepted
taxonIdCalais068	taxonIdCalais068	2014-09-29T12:19-0500	ISSN 1927-0488 E-ISSN 1927-0496	http://dx.doi.org/10.5539/enrr.v2n3p115	taxonIdCalais068		http://www.tropicos.org/Name/40018467	Miconia					Equisetopsida	Myrtales	Melastomataceae	Miconia				genus	Ruiz & Pav.	accepted
taxonIdCalais069	taxonIdCalais069	2014-09-29T12:19-0500	ISSN 1927-0488 E-ISSN 1927-0496	http://dx.doi.org/10.5539/enrr.v2n3p115	taxonIdCalais069		http://www.tropicos.org/Name/40019048	Microlicia					Equisetopsida	Myrtales	Melastomataceae	Microlicia				genus	D. Don	accepted
taxonIdCalais070	taxonIdCalais070	2014-09-29T12:19-0500	ISSN 1927-0488 E-ISSN 1927-0496	http://dx.doi.org/10.5539/enrr.v2n3p115	taxonIdCalais070		http://www.tropicos.org/Name/50257594	Tibouchina heteromalla					Equisetopsida	Myrtales	Melastomataceae	Tibouchina		heteromalla		species	(D. Don) Cogn.	accepted
taxonIdCalais071	taxonIdCalais071	2014-09-29T12:19-0500	ISSN 1927-0488 E-ISSN 1927-0496	http://dx.doi.org/10.5539/enrr.v2n3p115	taxonIdCalais071		http://www.tropicos.org/Name/22101843	Myrcia amazonica					Equisetopsida	Myrtales	Myrtaceae	Myrcia		amazonica		species	DC.	accepted
taxonIdCalais072	taxonIdCalais072	2014-09-29T12:19-0500	ISSN 1927-0488 E-ISSN 1927-0496	http://dx.doi.org/10.5539/enrr.v2n3p115	taxonIdCalais072		http://www.tropicos.org/Name/22101779	Myrcia splendens					Equisetopsida	Myrtales	Myrtaceae	Myrcia		splendens		species	(Sw.) DC.	accepted
taxonIdCalais073	taxonIdCalais073	2014-09-29T12:19-0500	ISSN 1927-0488 E-ISSN 1927-0496	http://dx.doi.org/10.5539/enrr.v2n3p115	taxonIdCalais073		http://www.tropicos.org/Name/23511280	Sacoila lanceolata					Equisetopsida	Asparagales	Orchidaceae	Sacoila		lanceolata		species	(Aubl.) Garay	accepted
taxonIdCalais074	taxonIdCalais074	2014-09-29T12:19-0500	ISSN 1927-0488 E-ISSN 1927-0496	http://dx.doi.org/10.5539/enrr.v2n3p115	taxonIdCalais074		http://www.tropicos.org/Name/25511647	Andropogon leucostachyus					Equisetopsida	Poales	Poaceae	Andropogon		leucostachyus		species	Kunth	accepted
taxonIdCalais075	taxonIdCalais075	2014-09-29T12:19-0500	ISSN 1927-0488 E-ISSN 1927-0496	http://dx.doi.org/10.5539/enrr.v2n3p115	taxonIdCalais075		http://www.tropicos.org/Name/50327896	Apochloa poliophylla					Equisetopsida	Poales	Poaceae	Apochloa		poliophylla		species	(Renvoize & Zuloaga) Zuloaga & Morrone	accepted
taxonIdCalais076	taxonIdCalais076	2014-09-29T12:19-0500	ISSN 1927-0488 E-ISSN 1927-0496	http://dx.doi.org/10.5539/enrr.v2n3p115	taxonIdCalais076		http://www.tropicos.org/Name/25524594	Axonopus siccus					Equisetopsida	Poales	Poaceae	Axonopus		siccus		species	(Nees) Kuhlm.	accepted
taxonIdCalais077	taxonIdCalais077	2014-09-29T12:19-0500	ISSN 1927-0488 E-ISSN 1927-0496	http://dx.doi.org/10.5539/enrr.v2n3p115	taxonIdCalais077		http://www.tropicos.org/Name/25530737	Urochloa decumbens					Equisetopsida	Poales	Poaceae	Urochloa		decumbens		species	(Stapf) R.D. Webster	accepted
taxonIdCalais078	taxonIdCalais078	2014-09-29T12:19-0500	ISSN 1927-0488 E-ISSN 1927-0496	http://dx.doi.org/10.5539/enrr.v2n3p115	taxonIdCalais078		http://www.tropicos.org/Name/40007510	Chloris					Equisetopsida	Poales	Poaceae	Chloris				genus	Sw.	accepted
taxonIdCalais079	taxonIdCalais079	2014-09-29T12:19-0500	ISSN 1927-0488 E-ISSN 1927-0496	http://dx.doi.org/10.5539/enrr.v2n3p115	taxonIdCalais079		http://www.tropicos.org/Name/25513360	Eragrostis maypurensis					Equisetopsida	Poales	Poaceae	Eragrostis		maypurensis		species	(Kunth) Steud.	accepted
taxonIdCalais080	taxonIdCalais080	2014-09-29T12:19-0500	ISSN 1927-0488 E-ISSN 1927-0496	http://dx.doi.org/10.5539/enrr.v2n3p115	taxonIdCalais080		http://www.tropicos.org/Name/25519226	Ichnanthus bambusiflorus					Equisetopsida	Poales	Poaceae	Ichnanthus		bambusiflorus		species	(Trin.) D�ll	accepted
taxonIdCalais081	taxonIdCalais081	2014-09-29T12:19-0500	ISSN 1927-0488 E-ISSN 1927-0496	http://dx.doi.org/10.5539/enrr.v2n3p115	taxonIdCalais081		http://www.tropicos.org/Name/25512172	Melinis minutiflora					Equisetopsida	Poales	Poaceae	Melinis		minutiflora		species	P. Beauv.	accepted
taxonIdCalais082	taxonIdCalais082	2014-09-29T12:19-0500	ISSN 1927-0488 E-ISSN 1927-0496	http://dx.doi.org/10.5539/enrr.v2n3p115	taxonIdCalais082		http://www.tropicos.org/Name/25522064	Panicum pseudisachne					Equisetopsida	Poales	Poaceae	Panicum		pseudisachne		species	Mez	accepted
taxonIdCalais083	taxonIdCalais083	2014-09-29T12:19-0500	ISSN 1927-0488 E-ISSN 1927-0496	http://dx.doi.org/10.5539/enrr.v2n3p115	taxonIdCalais083		http://www.tropicos.org/Name/25522086	Panicum wettsteinii					Equisetopsida	Poales	Poaceae	Panicum		wettsteinii		species	Hack.	accepted
taxonIdCalais084	taxonIdCalais084	2014-09-29T12:19-0500	ISSN 1927-0488 E-ISSN 1927-0496	http://dx.doi.org/10.5539/enrr.v2n3p115	taxonIdCalais084		http://www.tropicos.org/Name/25517428	Paspalum hyalinum					Equisetopsida	Poales	Poaceae	Paspalum		hyalinum		species	Nees ex Trin.	accepted
taxonIdCalais085	taxonIdCalais085	2014-09-29T12:19-0500	ISSN 1927-0488 E-ISSN 1927-0496	http://dx.doi.org/10.5539/enrr.v2n3p115	taxonIdCalais085		http://www.tropicos.org/Name/25509839	Paspalum notatum					Equisetopsida	Poales	Poaceae	Paspalum		notatum		species	Alain ex Fl�gg�	accepted
taxonIdCalais086	taxonIdCalais086	2014-09-29T12:19-0500	ISSN 1927-0488 E-ISSN 1927-0496	http://dx.doi.org/10.5539/enrr.v2n3p115	taxonIdCalais086		http://www.tropicos.org/Name/25512333	Paspalum plicatulum					Equisetopsida	Poales	Poaceae	Paspalum		plicatum		species	Michx.	accepted
taxonIdCalais087	taxonIdCalais087	2014-09-29T12:19-0500	ISSN 1927-0488 E-ISSN 1927-0496	http://dx.doi.org/10.5539/enrr.v2n3p115	taxonIdCalais087		http://www.tropicos.org/Name/25512365	Pennisetum setosum					Equisetopsida	Poales	Poaceae	Pennisetum		setosum		species	(Sw.) Rich.	accepted
taxonIdCalais088	taxonIdCalais088	2014-09-29T12:19-0500	ISSN 1927-0488 E-ISSN 1927-0496	http://dx.doi.org/10.5539/enrr.v2n3p115	taxonIdCalais088		http://www.tropicos.org/Name/25509881	Poa annua					Equisetopsida	Poales	Poaceae	Poa		annua		species	L.	accepted
taxonIdCalais089	taxonIdCalais089	2014-09-29T12:19-0500	ISSN 1927-0488 E-ISSN 1927-0496	http://dx.doi.org/10.5539/enrr.v2n3p115	taxonIdCalais089		http://www.tropicos.org/Name/25509951	Schizachyrium sanguineum					Equisetopsida	Poales	Poaceae	Schizachyrium		sanguineum		species	(Retz.) Alston	accepted
taxonIdCalais090	taxonIdCalais090	2014-09-29T12:19-0500	ISSN 1927-0488 E-ISSN 1927-0496	http://dx.doi.org/10.5539/enrr.v2n3p115	taxonIdCalais090		http://www.tropicos.org/Name/50193775	Sporobolus metallicola					Equisetopsida	Poales	Poaceae	Sporobolus		metallicola		species	Longhi-Wagner & Boechat	accepted
taxonIdCalais091	taxonIdCalais091	2014-09-29T12:19-0500	ISSN 1927-0488 E-ISSN 1927-0496	http://dx.doi.org/10.5539/enrr.v2n3p115	taxonIdCalais091		http://www.tropicos.org/Name/42000357	Poaceae					Equisetopsida	Poales	Poaceae					family	Barnhart	accepted
taxonIdCalais092	taxonIdCalais092	2014-09-29T12:19-0500	ISSN 1927-0488 E-ISSN 1927-0496	http://dx.doi.org/10.5539/enrr.v2n3p115	taxonIdCalais092		http://www.tropicos.org/Name/42000357	Poaceae					Equisetopsida	Poales	Poaceae					family	Barnhart	accepted
taxonIdCalais093	taxonIdCalais093	2014-09-29T12:19-0500	ISSN 1927-0488 E-ISSN 1927-0496	http://dx.doi.org/10.5539/enrr.v2n3p115	taxonIdCalais093		http://www.tropicos.org/Name/50113326	Polygala paniculata					Equisetopsida	Fabales	Polygalaceae	Polygala		paniculata		species	L.	accepted
taxonIdCalais094	taxonIdCalais094	2014-09-29T12:19-0500	ISSN 1927-0488 E-ISSN 1927-0496	http://dx.doi.org/10.5539/enrr.v2n3p115	taxonIdCalais094		http://www.tropicos.org/Name/25901033	Polygala violacea					Equisetopsida	Fabales	Polygalaceae	Polygala		violacea		species	Aubl.	accepted
taxonIdCalais095	taxonIdCalais095	2014-09-29T12:19-0500	ISSN 1927-0488 E-ISSN 1927-0496	http://dx.doi.org/10.5539/enrr.v2n3p115	taxonIdCalais095		http://www.tropicos.org/Name/26610129	Pecluma pectinata					Equisetopsida	Polypodiales	Polypodiaceae	Pecluma		pectinata		species	(L.) M.G. Price	accepted
taxonIdCalais096	taxonIdCalais096	2014-09-29T12:19-0500	ISSN 1927-0488 E-ISSN 1927-0496	http://dx.doi.org/10.5539/enrr.v2n3p115	taxonIdCalais096		http://www.tropicos.org/Name/27800793	Rubus brasiliensis					Equisetopsida	Rosales	Rosaceae	Rubus		brasiliensis		species	Mart.	accepted
taxonIdCalais097	taxonIdCalais097	2014-09-29T12:19-0500	ISSN 1927-0488 E-ISSN 1927-0496	http://dx.doi.org/10.5539/enrr.v2n3p115	taxonIdCalais097		http://www.tropicos.org/Name/27904520	Spermacoce verticillata					Equisetopsida	Gentianales	Rubiaceae	Borreria		verticillata		species	L.	accepted
taxonIdCalais098	taxonIdCalais098	2014-09-29T12:19-0500	ISSN 1927-0488 E-ISSN 1927-0496	http://dx.doi.org/10.5539/enrr.v2n3p115	taxonIdCalais098		http://www.tropicos.org/Name/27903133	Diodia teres					Equisetopsida	Gentianales	Rubiaceae	Diodella		teres		species	Walter	accepted
taxonIdCalais099	taxonIdCalais099	2014-09-29T12:19-0500	ISSN 1927-0488 E-ISSN 1927-0496	http://dx.doi.org/10.5539/enrr.v2n3p115	taxonIdCalais099		http://www.tropicos.org/Name/28101406	Dictyoloma vandellianum					Equisetopsida	Sapindales	Rutaceae	Dictyoloma		vandellianum		species	A.H.L. Juss.	accepted
taxonIdCalais100	taxonIdCalais100	2014-09-29T12:19-0500	ISSN 1927-0488 E-ISSN 1927-0496	http://dx.doi.org/10.5539/enrr.v2n3p115	taxonIdCalais100		http://www.tropicos.org/Name/28601383	Matayba marginata					Equisetopsida	Sapindales	Sapindaceae	Matayba		marginata		species	Radlk.	accepted
taxonIdCalais101	taxonIdCalais101	2014-09-29T12:19-0500	ISSN 1927-0488 E-ISSN 1927-0496	http://dx.doi.org/10.5539/enrr.v2n3p115	taxonIdCalais101		http://www.tropicos.org/Name/50294027	Anemia ferruginea var. ahenobarba					Equisetopsida	Schizaeales	Anemiaceae	Anemia		ahenobarba		species	(Christ.) Mickel	accepted
taxonIdCalais102	taxonIdCalais102	2014-09-29T12:19-0500	ISSN 1927-0488 E-ISSN 1927-0496	http://dx.doi.org/10.5539/enrr.v2n3p115	taxonIdCalais102		http://www.tropicos.org/Name/29603035	Schwenckia americana					Equisetopsida	Solanales	Solanaceae	Schwenckia		americana		species	D. Royen ex L.	accepted
taxonIdCalais103	taxonIdCalais103	2014-09-29T12:19-0500	ISSN 1927-0488 E-ISSN 1927-0496	http://dx.doi.org/10.5539/enrr.v2n3p115	taxonIdCalais103		http://www.tropicos.org/Name/29600095	Solanum americanum					Equisetopsida	Solanales	Solanaceae	Solanum		americanum		species	Mill.	accepted
taxonIdCalais104	taxonIdCalais104	2014-09-29T12:19-0500	ISSN 1927-0488 E-ISSN 1927-0496	http://dx.doi.org/10.5539/enrr.v2n3p115	taxonIdCalais104		http://www.tropicos.org/Name/29601478	Solanum granuloso-leprosum					Equisetopsida	Solanales	Solanaceae	Solanum		granuloso-leprosum		species	Dunal	accepted
taxonIdCalais105	taxonIdCalais105	2014-09-29T12:19-0500	ISSN 1927-0488 E-ISSN 1927-0496	http://dx.doi.org/10.5539/enrr.v2n3p115	taxonIdCalais105		http://www.tropicos.org/Name/33700010	Lantana camara					Equisetopsida	Lamiales	Verbenaceae	Lantana		camara		species	L.	accepted
taxonIdCalais106	taxonIdCalais106	2014-09-29T12:19-0500	ISSN 1927-0488 E-ISSN 1927-0496	http://dx.doi.org/10.5539/enrr.v2n3p115	taxonIdCalais106		http://www.tropicos.org/Name/33700967	Lantana fucata					Equisetopsida	Lamiales	Verbenaceae	Lantana		fucata		species	Lindl.	accepted
taxonIdCalais107	taxonIdCalais107	2014-09-29T12:19-0500	ISSN 1927-0488 E-ISSN 1927-0496	http://dx.doi.org/10.5539/enrr.v2n3p115	taxonIdCalais107		http://www.tropicos.org/Name/33700254	Lippia hermannioides					Equisetopsida	Lamiales	Verbenaceae	Lippia		hermannioides		species	Cham.	accepted
